# Supplementary material
Source: PubMed Central journal article supplement (PMC4732411)
Supplement: itxc_a_1061477_sm5412.pdf [file itxc_a_1061477_sm5412.pdf]

Dose-response Data and BMD Curves from EPL (2011) and  
Dodd *et al.* (2012)

| Lesion Code and Description |                     |                                                                                      |
|-----------------------------|---------------------|--------------------------------------------------------------------------------------|
| Lesion Code                 | Lesion Location     | Lesion Description                                                                   |
| m_rea                       | Ventral Respiratory | male rat nasal respiratory epithelial adenoma                                        |
| f_rea                       | Ventral Respiratory | female rat nasal respiratory epithelial adenoma                                      |
| m_oen                       | Dorsal Olfactory    | male rat nasal olfactory epithelial neuroblastoma                                    |
| f_oen                       | Dorsal Olfactory    | female rat nasal olfactory epithelial neuroblastoma                                  |
| m_reh                       | Ventral Respiratory | male rat respiratory epithelium - hyperplasia (2 year study)                         |
| m_resm                      | Ventral Respiratory | male rat respiratory epithelium - squamous metaplasia (2 year study)                 |
| m_oed                       | Dorsal Olfactory    | male rat olfactory epithelium - Degeneration (2 year study)                          |
| m_oh                        | Dorsal Olfactory    | male rat olfactory epithelium - hyperplasia (2 year study)                           |
| f_reh                       | Ventral Respiratory | female rat respiratory epithelium - hyperplasia (2 year study)                       |
| f_resm                      | Ventral Respiratory | female rat respiratory epithelium - squamous metaplasia (2 year study)               |
| f_oed                       | Dorsal Olfactory    | female rat olfactory epithelium - Degeneration (2 year study)                        |
| f_oh                        | Dorsal Olfactory    | female rat olfactory epithelium - hyperplasia (2 year study)                         |
| m_oeic                      | Dorsal Olfactory    | male rat olfactory epithelium - inflammation chronic (2 year study)                  |
| f_oeic                      | Dorsal Olfactory    | female rat olfactory epithelium - inflammation chronic (2 year study)                |
| m_gch                       | Ventral Respiratory | male rat respiratory epithelium – goblet cell hyperplasia (2 year study)             |
| m_gch_9                     | Ventral Respiratory | male rat nasopharyngeal duct - goblet cell hypertrophy/hyperplasia (90 day study)    |
| f_gch                       | Ventral Respiratory | female rat respiratory epithelium – goblet cell hyperplasia (2 year study)           |
| f_gch_9                     | Ventral Respiratory | female rat nasopharyngeal duct - goblet cell hypertrophy/hyperplasia (90 day study)  |
| m_reh_9                     | Ventral Respiratory | male rat respiratory epithelium - hyperplasia (90 day study)                         |
| m_resm_9                    | Ventral Respiratory | male rat respiratory epithelium - squamous metaplasia (90 day study)                 |
| m_oed_9                     | Dorsal Olfactory    | male rat olfactory epithelium - Degeneration (90 day study)                          |
| m_oh_9                      | Dorsal Olfactory    | male rat olfactory epithelium - hyperplasia (90 day study)                           |
| f_reh_9                     | Ventral Respiratory | female rat respiratory epithelium - hyperplasia (90 day study)                       |
| f_resm_9                    | Ventral Respiratory | female rat respiratory epithelium - squamous metaplasia (90 day study)               |
| f_oed_9                     | Dorsal Olfactory    | female rat olfactory epithelium - Degeneration (90 day study)                        |
| f_oh_9                      | Dorsal Olfactory    | female rat olfactory epithelium - hyperplasia (90 day study)                         |
| m_nt_inflam                 | Dorsal Olfactory    | male rat nasal tip epithelium inflammation (90 day study)                            |
| f_nt_inflam                 | Dorsal Olfactory    | female rat nasal tip epithelium inflammation (90 day study)**                        |
| m_nt_inflam_rec             | Dorsal Olfactory    | male rat nasal tip epithelium inflammation, 4 weeks post recovery (90 day study)     |
| f_nt_inflam_rec             | Dorsal Olfactory    | female rat nasal tip epithelium inflammation, 4 weeks post recovery (90 day study)** |

## Quantitative Consideration of the Severity of Lesions Using Quantal BMDs Modeling Techniques

### Female REH Lesions in the Subchronic (90-Day) Dodd et al. (2012) Study

| Group                | 1  | 2        | 3        | 4        | 5        |
|----------------------|----|----------|----------|----------|----------|
| Amt Mtb (nmol/min-g) | 0  | 0.912448 | 4.438954 | 7.122926 | 7.547781 |
| Number Examined      | 10 | 10       | 10       | 10       | 10       |
| With f_reh lesion*   | 0  | 0        | 10       | 9        | 9        |
| Severity 1           | 0  | 0        | 10       | 2        | 3        |
| Severity 2           | 0  | 0        | 0        | 7        | 6        |
| Severity 3           | 0  | 0        | 0        | 0        | 0        |
| Severity 4           | 0  | 0        | 0        | 0        | 0        |
| Severity 5           | 0  | 0        | 0        | 0        | 0        |
| Average Severity     | -- | --       | 1.00     | 1.60     | 1.50     |

  

| f_reh_9_md4 |            |                      |    |          |          |
|-------------|------------|----------------------|----|----------|----------|
| Group       | Conc (ppm) | Amt Mtb (nmol/min-g) | N  | Effect 1 | Effect 2 |
| 1           | 0          | 0.000                | 10 | 0        | 0        |
| 2           | 0.1        | 0.912                | 10 | 0        | 0        |
| 3           | 1          | 4.439                | 10 | 10       | 0        |
| 4           | 10         | 7.123                | 10 | 9        | 7        |
| 5           | 30         | 7.548                | 10 | 9        | 6        |

  

|                    |      |      |
|--------------------|------|------|
| BMD <sub>10</sub>  | 4.99 | 5.24 |
| BMDL <sub>10</sub> | 3.84 | 3.69 |

Dodd et al. Scale (1-5): 1= minimal, 2 = slight/mild, 3 = moderate, 4 = moderately severe, 5 = severe/high

\*Level 2, Transitional respiratory epithelium hyperplasia

### Female RESM Lesions in the Subchronic (90-Day) Dodd et al. (2012) Study

| Group                | 1  | 2        | 3        | 4        | 5        |
|----------------------|----|----------|----------|----------|----------|
| Amt Mtb (nmol/min-g) | 0  | 0.912448 | 4.438954 | 7.122926 | 7.547781 |
| Number Examined      | 10 | 10       | 10       | 10       | 10       |
| With f_resm lesion*  | 0  | 0        | 0        | 9        | 8        |
| Severity 1           | 0  | 0        | 0        | 9        | 8        |
| Severity 2           | 0  | 0        | 0        | 0        | 0        |
| Severity 3           | 0  | 0        | 0        | 0        | 0        |
| Severity 4           | 0  | 0        | 0        | 0        | 0        |
| Severity 5           | 0  | 0        | 0        | 0        | 0        |
| Average Severity     | -- | --       | --       | 0.90     | 0.80     |

  

| f_resm_9_md4 |            |                      |    |          |          |
|--------------|------------|----------------------|----|----------|----------|
| Group        | Conc (ppm) | Amt Mtb (nmol/min-g) | N  | Effect 1 | Effect 2 |
| 1            | 0          | 0.000                | 10 | 0        | 0        |
| 2            | 0.1        | 0.912                | 10 | 0        | 0        |
| 3            | 1          | 4.439                | 10 | 0        | 0        |
| 4            | 10         | 7.123                | 10 | 9        | 0        |
| 5            | 30         | 7.548                | 10 | 8        | 0        |

  

|                    |      |    |
|--------------------|------|----|
| BMD <sub>10</sub>  | 4.95 | -- |
| BMDL <sub>10</sub> | 3.74 | -- |

Dodd et al. Scale (1-5): 1= minimal, 2 = slight/mild, 3 = moderate, 4 = moderately severe, 5 = severe/high

\*Level 2, Transitional respiratory epithelium squamous metaplasia

### Female OED Lesions in the Subchronic (90-Day) Dodd et al. (2012) Study

| Group                         | 1  | 2        | 3        | 4        | 5        |
|-------------------------------|----|----------|----------|----------|----------|
| Amt Mtb (nmol/min-g)          | 0  | 0.141975 | 1.380519 | 10.21883 | 19.38274 |
| Number Examined               | 10 | 10       | 10       | 10       | 10       |
| With f <sub>oed</sub> lesion* | 0  | 0        | 0        | 10       | 10       |
| Severity 1                    | 0  | 0        | 0        | 0        | 0        |
| Severity 2                    | 0  | 0        | 0        | 7        | 8        |
| Severity 3                    | 0  | 0        | 0        | 3        | 2        |
| Severity 4                    | 0  | 0        | 0        | 0        | 0        |
| Severity 5                    | 0  | 0        | 0        | 0        | 0        |
| Average Severity              | -- | --       | --       | 2.30     | 2.20     |

  

| f <sub>oed</sub> _9_md4 |            |                      |    |          |          |
|-------------------------|------------|----------------------|----|----------|----------|
| Group                   | Conc (ppm) | Amt Mtb (nmol/min-g) | N  | Effect 1 | Effect 2 |
| 1                       | 0          | 0.000                | 10 | 0        | 0        |
| 2                       | 0.1        | 0.142                | 10 | 0        | 0        |
| 3                       | 1          | 1.381                | 10 | 0        | 0        |
| 4                       | 10         | 10.219               | 10 | 10       | 10       |
| 5                       | 30         | 19.383               | 10 | 10       | 10       |

  

|                    |      |      |
|--------------------|------|------|
| BMD <sub>10</sub>  | 4.41 | 4.41 |
| BMDL <sub>10</sub> | 1.25 | 1.25 |

Dodd et al. Scale (1-5): 1= minimal, 2 = slight/mild, 3 = moderate, 4 = moderately severe, 5 = severe/high

\*Max severity of Levels 2-5, Olfactory epithelium degeneration

### Female OEH Lesions in the Subchronic (90-Day) Dodd et al. (2012) Study

| Group                         | 1  | 2        | 3        | 4        | 5        |
|-------------------------------|----|----------|----------|----------|----------|
| Amt Mtb (nmol/min-g)          | 0  | 0.141975 | 1.380519 | 10.21883 | 19.38274 |
| Number Examined               | 10 | 10       | 10       | 10       | 10       |
| With f <sub>oeh</sub> lesion* | 0  | 0        | 0        | 10       | 10       |
| Severity 1                    | 0  | 0        | 0        | 0        | 0        |
| Severity 2                    | 0  | 0        | 0        | 10       | 5        |
| Severity 3                    | 0  | 0        | 0        | 0        | 5        |
| Severity 4                    | 0  | 0        | 0        | 0        | 0        |
| Severity 5                    | 0  | 0        | 0        | 0        | 0        |
| Average Severity              | -- | --       | --       | 2.00     | 2.50     |

  

| f <sub>oeh</sub> _9_md4 |            |                      |    |          |          |
|-------------------------|------------|----------------------|----|----------|----------|
| Group                   | Conc (ppm) | Amt Mtb (nmol/min-g) | N  | Effect 1 | Effect 2 |
| 1                       | 0          | 0.000                | 10 | 0        | 0        |
| 2                       | 0.1        | 0.142                | 10 | 0        | 0        |
| 3                       | 1          | 1.381                | 10 | 0        | 0        |
| 4                       | 10         | 10.219               | 10 | 10       | 10       |
| 5                       | 30         | 19.383               | 10 | 10       | 10       |

  

|                    |      |      |
|--------------------|------|------|
| BMD <sub>10</sub>  | 4.41 | 4.41 |
| BMDL <sub>10</sub> | 1.25 | 1.25 |

Dodd et al. Scale (1-5): 1= minimal, 2 = slight/mild, 3 = moderate, 4 = moderately severe, 5 = severe/high

\*Max severity of Levels 2-5, Olfactory epithelium hyperplasia

#### Notes:

Effect 1 = Incidence of all lesions

Effect 2 = Incidence of lesions having a severity  $\geq 2$ .

BMDs = Average BMD (or BMDL) in nmol/min-g tissue

| Model Name     | Data File Name      | Option File Name | AIC     | Inputs + Estimates + Scaled Res. | P-value | Specified Effect | Risk Type  | BMD     | BMDL (POD) | Scaled residual for dose group near BMD | Δ BMD    | Δ BMD:POD | Consider Model | POD selected | Selected POD | Average BMD | Average POD | POD Range | N  | Model Note                                                          |
|----------------|---------------------|------------------|---------|----------------------------------|---------|------------------|------------|---------|------------|-----------------------------------------|----------|-----------|----------------|--------------|--------------|-------------|-------------|-----------|----|---------------------------------------------------------------------|
| Gamma          | f_oed_9_md4.dax     | Gam-BMR10.opt    | 2.00077 | Array                            | 1       | 0.1              | Extra risk | 3.14545 | 1.25963    | -0.016                                  | 1.88582  | 1.497122  | Y              | N            | --           | --          | --          | --        | -- |                                                                     |
| Logistic       | f_oed_9_md4.dax     | Log-BMR10.opt    | 4       | Array                            | 1       | 0.1              | Extra risk | 5.46189 | 1.2495     | 0                                       | 4.21239  | 3.371261  | Y              | N            | --           | --          | --          | --        | -- |                                                                     |
| LogLogistic    | f_oed_9_md4.dax     | LogLog-BMR10.opt | 2       | Array                            | 1       | 0.1              | Extra risk | 3.36446 | 1.29844    | 0                                       | 2.06602  | 1.591156  | Y              | Y            | 1.29844      | 4.4050143   | 1.2451886   | 0.20682   | 7  | Selected over Weibull because of smaller delta BMD                  |
| Probit         | f_oed_9_md4.dax     | Probit-BMR10.opt | 4       | Array                            | 1       | 0.1              | Extra risk | 5.26349 | 1.29435    | 0                                       | 3.96914  | 3.066512  | Y              | N            | --           | --          | --          | --        | -- |                                                                     |
| LogProbit      | f_oed_9_md4.dax     | LogPro-BMR10.opt | 4       | Array                            | 1       | 0.1              | Extra risk | 3.54958 | 1.29456    | 0                                       | 2.25502  | 1.74192   | Y              | N            | --           | --          | --          | --        | -- |                                                                     |
| Multistage     | f_oed_9_md4.dax     | NCMst1-BMR10.opt | 11.2155 | Array                            | 0.269   | 0.1              | Extra risk | 0.48343 | 0.279612   | -0.561                                  | 0.203816 | 0.728924  | N              | N            | --           | --          | --          | --        | -- | Outlier AIC                                                         |
| Multistage     | f_oed_9_md4.dax     | NCMst2-BMR10.opt | 3.84618 | Array                            | 0.9169  | 0.1              | Extra risk | 1.65623 | 0.823198   | -0.872                                  | 0.833032 | 1.011946  | N              | N            | --           | --          | --          | --        | -- | Not selected as Multistage because another has better fit           |
| Multistage     | f_oed_9_md4.dax     | NCMst3-BMR10.opt | 2.34613 | Array                            | 0.9964  | 0.1              | Extra risk | 2.65493 | 1.09162    | -0.387                                  | 1.56331  | 1.432101  | Y              | N            | --           | --          | --          | --        | -- | Selected as Multistage because has smallest AIC and largest P value |
| Multistage     | f_oed_9_md4.dax     | NCMst4-BMR10.opt | 2.0602  | Array                            | 0.9999  | 0.1              | Extra risk | 3.48114 | 0          | -0.162                                  | 3.48114  | #DIV/0!   | N              | N            | --           | --          | --          | --        | -- | BMDL = 0                                                            |
| Weibull        | f_oed_9_md4.dax     | Wei-BMR10.opt    | 2       | Array                            | 1       | 0.1              | Extra risk | 7.3953  | 1.22822    | 0                                       | 6.16708  | 5.021153  | Y              | N            | --           | --          | --          | --        | -- |                                                                     |
| Quantal-Linear | f_oed_9_md4.dax     | Quant-BMR10.opt  | 11.2155 | Array                            | 0.269   | 0.1              | Extra risk | 0.48343 | 0.279612   | -0.561                                  | 0.203817 | 0.728928  | N              | N            | --           | --          | --          | --        | -- | Outlier AIC                                                         |
| Gamma          | f_oed_9_sev_md4.dax | Gam-BMR10.opt    | 2.00077 | Array                            | 1       | 0.1              | Extra risk | 3.14545 | 1.25963    | -0.016                                  | 1.88582  | 1.497122  | Y              | N            | --           | --          | --          | --        | -- |                                                                     |
| Logistic       | f_oed_9_sev_md4.dax | Log-BMR10.opt    | 4       | Array                            | 1       | 0.1              | Extra risk | 5.46189 | 1.2495     | 0                                       | 4.21239  | 3.371261  | Y              | N            | --           | --          | --          | --        | -- |                                                                     |
| LogLogistic    | f_oed_9_sev_md4.dax | LogLog-BMR10.opt | 2       | Array                            | 1       | 0.1              | Extra risk | 3.36446 | 1.29844    | 0                                       | 2.06602  | 1.591156  | Y              | Y            | 1.29844      | 4.4050143   | 1.2451886   | 0.20682   | 7  | Selected over Weibull for POD because of smaller delta BMD          |
| Probit         | f_oed_9_sev_md4.dax | Probit-BMR10.opt | 4       | Array                            | 1       | 0.1              | Extra risk | 5.26349 | 1.29435    | 0                                       | 3.96914  | 3.066512  | Y              | N            | --           | --          | --          | --        | -- |                                                                     |
| LogProbit      | f_oed_9_sev_md4.dax | LogPro-BMR10.opt | 4       | Array                            | 1       | 0.1              | Extra risk | 3.54958 | 1.29456    | 0                                       | 2.25502  | 1.74192   | Y              | N            | --           | --          | --          | --        | -- |                                                                     |
| Multistage     | f_oed_9_sev_md4.dax | NCMst1-BMR10.opt | 11.2155 | Array                            | 0.269   | 0.1              | Extra risk | 0.48343 | 0.279612   | -0.561                                  | 0.203816 | 0.728924  | N              | N            | --           | --          | --          | --        | -- | Outlier AIC                                                         |
| Multistage     | f_oed_9_sev_md4.dax | NCMst2-BMR10.opt | 3.84618 | Array                            | 0.9169  | 0.1              | Extra risk | 1.65623 | 0.823198   | -0.872                                  | 0.833032 | 1.011946  | N              | N            | --           | --          | --          | --        | -- | Not selected as Multistage because another has better fit           |
| Multistage     | f_oed_9_sev_md4.dax | NCMst3-BMR10.opt | 2.34613 | Array                            | 0.9964  | 0.1              | Extra risk | 2.65493 | 1.09162    | -0.387                                  | 1.56331  | 1.432101  | Y              | N            | --           | --          | --          | --        | -- | Selected as Multistage because has smallest AIC and largest P value |
| Multistage     | f_oed_9_sev_md4.dax | NCMst4-BMR10.opt | 2.0602  | Array                            | 0.9999  | 0.1              | Extra risk | 3.48114 | 0          | -0.162                                  | 3.48114  | #DIV/0!   | N              | N            | --           | --          | --          | --        | -- | BMDL = 0                                                            |
| Weibull        | f_oed_9_sev_md4.dax | Wei-BMR10.opt    | 2       | Array                            | 1       | 0.1              | Extra risk | 7.3953  | 1.22822    | 0                                       | 6.16708  | 5.021153  | Y              | N            | --           | --          | --          | --        | -- |                                                                     |
| Quantal-Linear | f_oed_9_sev_md4.dax | Quant-BMR10.opt  | 11.2155 | Array                            | 0.269   | 0.1              | Extra risk | 0.48343 | 0.279612   | -0.561                                  | 0.203817 | 0.728928  | N              | N            | --           | --          | --          | --        | -- | Outlier AIC                                                         |
| Gamma          | f_oe_h_9_md4.dax    | Gam-BMR10.opt    | 2.00077 | Array                            | 1       | 0.1              | Extra risk | 3.14545 | 1.25963    | -0.016                                  | 1.88582  | 1.497122  | Y              | N            | --           | --          | --          | --        | -- |                                                                     |
| Logistic       | f_oe_h_9_md4.dax    | Log-BMR10.opt    | 4       | Array                            | 1       | 0.1              | Extra risk | 5.46189 | 1.2495     | 0                                       | 4.21239  | 3.371261  | Y              | N            | --           | --          | --          | --        | -- |                                                                     |
| LogLogistic    | f_oe_h_9_md4.dax    | LogLog-BMR10.opt | 2       | Array                            | 1       | 0.1              | Extra risk | 3.36446 | 1.29844    | 0                                       | 2.06602  | 1.591156  | Y              | Y            | 1.29844      | 4.4050143   | 1.2451886   | 0.20682   | 7  | Selected over Weibull because of smaller delta BMD                  |
| Probit         | f_oe_h_9_md4.dax    | Probit-BMR10.opt | 4       | Array                            | 1       | 0.1              | Extra risk | 5.26349 | 1.29435    | 0                                       | 3.96914  | 3.066512  | Y              | N            | --           | --          | --          | --        | -- |                                                                     |
| LogProbit      | f_oe_h_9_md4.dax    | LogPro-BMR10.opt | 4       | Array                            | 1       | 0.1              | Extra risk | 3.54958 | 1.29456    | 0                                       | 2.25502  | 1.74192   | Y              | N            | --           | --          | --          | --        | -- |                                                                     |
| Multistage     | f_oe_h_9_md4.dax    | NCMst1-BMR10.opt | 11.2155 | Array                            | 0.269   | 0.1              | Extra risk | 0.48343 | 0.279612   | -0.561                                  | 0.203816 | 0.728924  | N              | N            | --           | --          | --          | --        | -- | Outlier AIC                                                         |
| Multistage     | f_oe_h_9_md4.dax    | NCMst2-BMR10.opt | 3.84618 | Array                            | 0.9169  | 0.1              | Extra risk | 1.65623 | 0.823198   | -0.872                                  | 0.833032 | 1.011946  | N              | N            | --           | --          | --          | --        | -- | Not selected as Multistage because another has better fit           |
| Multistage     | f_oe_h_9_md4.dax    | NCMst3-BMR10.opt | 2.34613 | Array                            | 0.9964  | 0.1              | Extra risk | 2.65493 | 1.09162    | -0.387                                  | 1.56331  | 1.432101  | Y              | N            | --           | --          | --          | --        | -- | Selected as Multistage because has smallest AIC and largest P value |
| Multistage     | f_oe_h_9_md4.dax    | NCMst4-BMR10.opt | 2.0602  | Array                            | 0.9999  | 0.1              | Extra risk | 3.48114 | 0          | -0.162                                  | 3.48114  | #DIV/0!   | N              | N            | --           | --          | --          | --        | -- | BMDL = 0                                                            |
| Weibull        | f_oe_h_9_md4.dax    | Wei-BMR10.opt    | 2       | Array                            | 1       | 0.1              | Extra risk | 7.3953  | 1.22822    | 0                                       | 6.16708  | 5.021153  | Y              | N            | --           | --          | --          | --        | -- |                                                                     |
| Quantal-Linear | f_oe_h_9_md4.dax    | Quant-BMR10.opt  | 11.2155 | Array                            | 0.269   | 0.1              | Extra risk | 0.48343 | 0.279612   | -0.561                                  | 0.203817 | 0.728928  | N              | N            | --           | --          | --          | --        | -- | Outlier AIC                                                         |

| Model Name     | Data File Name      | Option File Name | AIC     | Inputs + Estimates + Scaled Res. | P-value | Specified Effect | Risk Type  | BMD     | BMDL (POD) | Scaled residual for dose group near BMD | Δ BMD    | Δ BMD:POD | Consider Model | POD selected | Selected POD | Average BMD | Average POD | POD Range | N  | Model Note                                                          |
|----------------|---------------------|------------------|---------|----------------------------------|---------|------------------|------------|---------|------------|-----------------------------------------|----------|-----------|----------------|--------------|--------------|-------------|-------------|-----------|----|---------------------------------------------------------------------|
| Gamma          | f_oeH_9_sev_md4.dax | Gam-BMR10.opt    | 2.00077 | Array                            | 1       | 0.1              | Extra risk | 3.14545 | 1.25963    | -0.016                                  | 1.88582  | 1.497122  | Y              | N            | --           | --          | --          | --        | -- |                                                                     |
| Logistic       | f_oeH_9_sev_md4.dax | Log-BMR10.opt    | 4       | Array                            | 1       | 0.1              | Extra risk | 5.46189 | 1.2495     | 0                                       | 4.21239  | 3.371261  | Y              | N            | --           | --          | --          | --        | -- |                                                                     |
| LogLogistic    | f_oeH_9_sev_md4.dax | LogLog-BMR10.opt | 2       | Array                            | 1       | 0.1              | Extra risk | 3.36446 | 1.29844    | 0                                       | 2.06602  | 1.591156  | Y              | Y            | 1.29844      | 4.4050143   | 1.2451886   | 0.20682   | 7  | Selected over Weibull because of smaller delta BMD                  |
| Probit         | f_oeH_9_sev_md4.dax | Probit-BMR10.opt | 4       | Array                            | 1       | 0.1              | Extra risk | 5.26349 | 1.29435    | 0                                       | 3.96914  | 3.066512  | Y              | N            | --           | --          | --          | --        | -- |                                                                     |
| LogProbit      | f_oeH_9_sev_md4.dax | LogPro-BMR10.opt | 4       | Array                            | 1       | 0.1              | Extra risk | 3.54958 | 1.29456    | 0                                       | 2.25502  | 1.74192   | Y              | N            | --           | --          | --          | --        | -- |                                                                     |
| Multistage     | f_oeH_9_sev_md4.dax | NCMst1-BMR10.opt | 11.2155 | Array                            | 0.269   | 0.1              | Extra risk | 0.48343 | 0.279612   | -0.561                                  | 0.203816 | 0.728924  | N              | N            | --           | --          | --          | --        | -- | Outlier AIC                                                         |
| Multistage     | f_oeH_9_sev_md4.dax | NCMst2-BMR10.opt | 3.84618 | Array                            | 0.9169  | 0.1              | Extra risk | 1.65623 | 0.823198   | -0.872                                  | 0.833032 | 1.011946  | N              | N            | --           | --          | --          | --        | -- | Not selected as Multistage because another has better fit           |
| Multistage     | f_oeH_9_sev_md4.dax | NCMst3-BMR10.opt | 2.34613 | Array                            | 0.9964  | 0.1              | Extra risk | 2.65493 | 1.09162    | -0.387                                  | 1.56331  | 1.432101  | Y              | N            | --           | --          | --          | --        | -- | Selected as Multistage because has smallest AIC and largest P value |
| Multistage     | f_oeH_9_sev_md4.dax | NCMst4-BMR10.opt | 2.0602  | Array                            | 0.9999  | 0.1              | Extra risk | 3.48114 | 0          | -0.162                                  | 3.48114  | #DIV/0!   | N              | N            | --           | --          | --          | --        | -- | BMDL = 0                                                            |
| Weibull        | f_oeH_9_sev_md4.dax | Wei-BMR10.opt    | 2       | Array                            | 1       | 0.1              | Extra risk | 7.3953  | 1.22822    | 0                                       | 6.16708  | 5.021153  | Y              | N            | --           | --          | --          | --        | -- |                                                                     |
| Quantal-Linear | f_oeH_9_sev_md4.dax | Quant-BMR10.opt  | 11.2155 | Array                            | 0.269   | 0.1              | Extra risk | 0.48343 | 0.279612   | -0.561                                  | 0.203817 | 0.728928  | N              | N            | --           | --          | --          | --        | -- | Outlier AIC                                                         |
| Gamma          | f_reh_9_md4.dax     | Gam-BMR10.opt    | 18.6355 | Array                            | 0.7012  | 0.1              | Extra risk | 4.2322  | 3.61273    | -1.254                                  | 0.61947  | 0.171469  | Y              | N            | --           | --          | --          | --        | -- |                                                                     |
| Logistic       | f_reh_9_md4.dax     | Log-BMR10.opt    | 17.6354 | Array                            | 0.896   | 0.1              | Extra risk | 5.55254 | 4.12764    | -0.261                                  | 1.4249   | 0.345209  | Y              | N            | --           | --          | --          | --        | -- |                                                                     |
| LogLogistic    | f_reh_9_md4.dax     | LogLog-BMR10.opt | 17.4376 | Array                            | 0.9387  | 0.1              | Extra risk | 5.47818 | 4.22496    | -0.212                                  | 1.25322  | 0.296623  | Y              | N            | --           | --          | --          | --        | -- |                                                                     |
| Probit         | f_reh_9_md4.dax     | Probit-BMR10.opt | 17.6518 | Array                            | 0.8907  | 0.1              | Extra risk | 5.413   | 4.15537    | -0.221                                  | 1.25763  | 0.302652  | Y              | N            | --           | --          | --          | --        | -- |                                                                     |
| LogProbit      | f_reh_9_md4.dax     | LogPro-BMR10.opt | 17.4339 | Array                            | 0.9377  | 0.1              | Extra risk | 5.32694 | 4.25348    | -0.173                                  | 1.07346  | 0.252372  | Y              | Y            | 4.25348      | 4.9867857   | 3.8426929   | 1.68466   | 7  |                                                                     |
| Multistage     | f_reh_9_md4.dax     | NCMst1-BMR10.opt | 37.0266 | Array                            | 0.0033  | 0.1              | Extra risk | 0.71739 | 0.487642   | -1.197                                  | 0.229749 | 0.471143  | N              | N            | --           | --          | --          | --        | -- | P-value too low                                                     |
| Multistage     | f_reh_9_md4.dax     | NCMst2-BMR10.opt | 28.5214 | Array                            | 0.0548  | 0.1              | Extra risk | 2.00544 | 1.32384    | -0.469                                  | 0.6816   | 0.514866  | N              | N            | --           | --          | --          | --        | -- | P-value too low                                                     |
| Multistage     | f_reh_9_md4.dax     | NCMst3-BMR10.opt | 23.743  | Array                            | 0.2309  | 0.1              | Extra risk | 2.92732 | 2.03673    | -2.107                                  | 0.89059  | 0.437265  | N              | N            | --           | --          | --          | --        | -- | Not selected as Multistage because another has better fit           |
| Multistage     | f_reh_9_md4.dax     | NCMst4-BMR10.opt | 20.6867 | Array                            | 0.4879  | 0.1              | Extra risk | 3.58209 | 2.56882    | -1.679                                  | 1.01327  | 0.39445   | Y              | N            | --           | --          | --          | --        | -- | Selected as Multistage because has smallest AIC and largest P value |
| Weibull        | f_reh_9_md4.dax     | Wei-BMR10.opt    | 18.2771 | Array                            | 0.7725  | 0.1              | Extra risk | 5.32255 | 3.95585    | -0.433                                  | 1.3667   | 0.345488  | Y              | N            | --           | --          | --          | --        | -- |                                                                     |
| Quantal-Linear | f_reh_9_md4.dax     | Quant-BMR10.opt  | 37.0266 | Array                            | 0.0033  | 0.1              | Extra risk | 0.71739 | 0.487642   | -1.197                                  | 0.229749 | 0.471143  | N              | N            | --           | --          | --          | --        | -- | P-value too low                                                     |
| Gamma          | f_reh_9_sev_md4.dax | Gam-BMR10.opt    | 29.4993 | Array                            | 0.8539  | 0.1              | Extra risk | 4.94638 | 3.77618    | -0.694                                  | 1.1702   | 0.30989   | Y              | Y            | 3.77618      | 5.2434329   | 3.6892457   | 1.23229   | 7  |                                                                     |
| Logistic       | f_reh_9_sev_md4.dax | Log-BMR10.opt    | 31.4582 | Array                            | 0.6567  | 0.1              | Extra risk | 5.56791 | 3.83714    | -0.432                                  | 1.73077  | 0.451057  | Y              | N            | --           | --          | --          | --        | -- |                                                                     |
| LogLogistic    | f_reh_9_sev_md4.dax | LogLog-BMR10.opt | 31.1002 | Array                            | 0.7292  | 0.1              | Extra risk | 5.50933 | 3.90306    | -0.366                                  | 1.60627  | 0.411541  | Y              | N            | --           | --          | --          | --        | -- |                                                                     |
| Probit         | f_reh_9_sev_md4.dax | Probit-BMR10.opt | 31.2172 | Array                            | 0.6966  | 0.1              | Extra risk | 5.54104 | 3.8423     | -0.333                                  | 1.69874  | 0.442115  | Y              | N            | --           | --          | --          | --        | -- |                                                                     |
| LogProbit      | f_reh_9_sev_md4.dax | LogPro-BMR10.opt | 30.8944 | Array                            | 0.7658  | 0.1              | Extra risk | 5.45736 | 4.02849    | -0.274                                  | 1.42887  | 0.354691  | Y              | N            | --           | --          | --          | --        | -- |                                                                     |
| Multistage     | f_reh_9_sev_md4.dax | NCMst1-BMR10.opt | 39.8662 | Array                            | 0.0798  | 0.1              | Extra risk | 1.19595 | 0.775455   | -0.915                                  | 0.420495 | 0.542256  | N              | N            | --           | --          | --          | --        | -- | P-value too low                                                     |
| Multistage     | f_reh_9_sev_md4.dax | NCMst2-BMR10.opt | 35.0201 | Array                            | 0.3134  | 0.1              | Extra risk | 2.68381 | 1.58781    | -1.828                                  | 1.096    | 0.690259  | N              | N            | --           | --          | --          | --        | -- | Not selected as Multistage because another has better fit           |
| Multistage     | f_reh_9_sev_md4.dax | NCMst3-BMR10.opt | 32.5272 | Array                            | 0.5474  | 0.1              | Extra risk | 3.6241  | 2.29912    | -1.462                                  | 1.32498  | 0.576299  | N              | N            | --           | --          | --          | --        | -- | Not selected as Multistage because another has better fit           |
| Multistage     | f_reh_9_sev_md4.dax | NCMst4-BMR10.opt | 31.0701 | Array                            | 0.6997  | 0.1              | Extra risk | 4.25519 | 2.7962     | -1.153                                  | 1.45899  | 0.521776  | Y              | N            | --           | --          | --          | --        | -- | Selected as Multistage because has smallest AIC and largest P value |
| Weibull        | f_reh_9_sev_md4.dax | Wei-BMR10.opt    | 31.6192 | Array                            | 0.6345  | 0.1              | Extra risk | 5.42682 | 3.64135    | -0.488                                  | 1.78547  | 0.490332  | Y              | N            | --           | --          | --          | --        | -- |                                                                     |
| Quantal-Linear | f_reh_9_sev_md4.dax | Quant-BMR10.opt  | 39.8662 | Array                            | 0.0798  | 0.1              | Extra risk | 1.19595 | 0.775455   | -0.915                                  | 0.420495 | 0.542256  | N              | N            | --           | --          | --          | --        | -- | P-value too low                                                     |
| Gamma          | f_resm_9_md4.dax    | Gam-BMR10.opt    | 22.1517 | Array                            | 0.6703  | 0.1              | Extra risk | 4.39044 | 3.66306    | -1.098                                  | 0.72738  | 0.198572  | Y              | N            | --           | --          | --          | --        | -- |                                                                     |
| Logistic       | f_resm_9_md4.dax    | Log-BMR10.opt    | 22.5618 | Array                            | 0.5813  | 0.1              | Extra risk | 5.40146 | 3.94131    | -0.396                                  | 1.46015  | 0.370473  | Y              | N            | --           | --          | --          | --        | -- |                                                                     |

| Model Name     | Data File Name       | Option File Name | AIC     | Inputs + Estimates + Scaled Res. | P-value | Specified Effect | Risk Type  | BMD     | BMDL (POD) | Scaled residual for dose group near BMD | Δ BMD    | Δ BMD:POD | Consider Model | POD selected | Selected POD | Average BMD | Average POD | POD Range | N  | Model Note                                                          |                       |
|----------------|----------------------|------------------|---------|----------------------------------|---------|------------------|------------|---------|------------|-----------------------------------------|----------|-----------|----------------|--------------|--------------|-------------|-------------|-----------|----|---------------------------------------------------------------------|-----------------------|
| LogLogistic    | f_resm_9_md4.dax     | LogLog-BMR10.opt | 22.1805 | Array                            | 0.6611  | 0.1              | Extra risk | 5.34033 | 4.09242    | -0.335                                  | 1.24791  | 0.304932  | Y              | N            | --           | --          | --          | --        | -- |                                                                     |                       |
| Probit         | f_resm_9_md4.dax     | Probit-BMR10.opt | 22.5244 | Array                            | 0.5908  | 0.1              | Extra risk | 5.32946 | 3.9892     | -0.33                                   | 1.34026  | 0.335972  | Y              | N            | --           | --          | --          | --        | -- |                                                                     |                       |
| LogProbit      | f_resm_9_md4.dax     | LogPro-BMR10.opt | 22.1299 | Array                            | 0.6721  | 0.1              | Extra risk | 5.25288 | 4.15165    | -0.272                                  | 1.10123  | 0.265251  | Y              | Y            | 4.15165      | 4.9475843   | 3.7424486   | 1.54091   | 7  |                                                                     |                       |
| Multistage     | f_resm_9_md4.dax     | NCMst1-BMR10.opt | 38.2781 | Array                            | 0.0072  | 0.1              | Extra risk | 0.79352 | 0.535982   | -1.135                                  | 0.257539 | 0.480499  | N              | N            | --           | --          | --          | --        | -- | P-value too low                                                     |                       |
| Multistage     | f_resm_9_md4.dax     | NCMst2-BMR10.opt | 30.7641 | Array                            | 0.0828  | 0.1              | Extra risk | 2.13255 | 1.37373    | -0.441                                  | 0.75882  | 0.552379  | N              | N            | --           | --          | --          | --        | -- | P-value too low                                                     |                       |
| Multistage     | f_resm_9_md4.dax     | NCMst3-BMR10.opt | 26.6909 | Array                            | 0.2649  | 0.1              | Extra risk | 3.07082 | 2.08712    | -1.936                                  | 0.9837   | 0.471319  | N              | N            | --           | --          | --          | --        | -- | Not selected as Multistage because another has better fit           |                       |
| Multistage     | f_resm_9_md4.dax     | NCMst4-BMR10.opt | 24.1919 | Array                            | 0.4672  | 0.1              | Extra risk | 3.73118 | 2.61074    | -1.533                                  | 1.12044  | 0.429166  | Y              | N            | --           | --          | --          | --        | -- | Selected as Multistage because has smallest AIC and largest P value |                       |
| Weibull        | f_resm_9_md4.dax     | Wei-BMR10.opt    | 23.2617 | Array                            | 0.4918  | 0.1              | Extra risk | 5.18734 | 3.74876    | -0.547                                  | 1.43858  | 0.383748  | Y              | N            | --           | --          | --          | --        | -- |                                                                     |                       |
| Quantal-Linear | f_resm_9_md4.dax     | Quant-BMR10.opt  | 38.2781 | Array                            | 0.0072  | 0.1              | Extra risk | 0.79352 | 0.535982   | -1.135                                  | 0.257539 | 0.480499  | N              | N            | --           | --          | --          | --        | -- | P-value too low                                                     |                       |
| Gamma          | f_resm_9_sev_md4.dax | Gam-BMR10.opt    | NA      | NA                               | NA      | NA               | NA         | NA      | NA         | NA                                      | NA       | NA        | NA             | NA           | NA           | NA          | NA          | NA        | NA | NA                                                                  | Could not run in BMDS |
| Logistic       | f_resm_9_sev_md4.dax | Log-BMR10.opt    | NA      | NA                               | NA      | NA               | NA         | NA      | NA         | NA                                      | NA       | NA        | NA             | NA           | NA           | NA          | NA          | NA        | NA | NA                                                                  | Could not run in BMDS |
| LogLogistic    | f_resm_9_sev_md4.dax | LogLog-BMR10.opt | NA      | NA                               | NA      | NA               | NA         | NA      | NA         | NA                                      | NA       | NA        | NA             | NA           | NA           | NA          | NA          | NA        | NA | NA                                                                  | Could not run in BMDS |
| Probit         | f_resm_9_sev_md4.dax | Probit-BMR10.opt | NA      | NA                               | NA      | NA               | NA         | NA      | NA         | NA                                      | NA       | NA        | NA             | NA           | NA           | NA          | NA          | NA        | NA | NA                                                                  | Could not run in BMDS |
| LogProbit      | f_resm_9_sev_md4.dax | LogPro-BMR10.opt | NA      | NA                               | NA      | NA               | NA         | NA      | NA         | NA                                      | NA       | NA        | NA             | NA           | NA           | NA          | NA          | NA        | NA | NA                                                                  | Could not run in BMDS |
| Multistage     | f_resm_9_sev_md4.dax | NCMst1-BMR10.opt | NA      | NA                               | NA      | NA               | NA         | NA      | NA         | NA                                      | NA       | NA        | NA             | NA           | NA           | NA          | NA          | NA        | NA | NA                                                                  | Could not run in BMDS |
| Multistage     | f_resm_9_sev_md4.dax | NCMst2-BMR10.opt | NA      | NA                               | NA      | NA               | NA         | NA      | NA         | NA                                      | NA       | NA        | NA             | NA           | NA           | NA          | NA          | NA        | NA | NA                                                                  | Could not run in BMDS |
| Multistage     | f_resm_9_sev_md4.dax | NCMst3-BMR10.opt | NA      | NA                               | NA      | NA               | NA         | NA      | NA         | NA                                      | NA       | NA        | NA             | NA           | NA           | NA          | NA          | NA        | NA | NA                                                                  | Could not run in BMDS |
| Multistage     | f_resm_9_sev_md4.dax | NCMst4-BMR10.opt | NA      | NA                               | NA      | NA               | NA         | NA      | NA         | NA                                      | NA       | NA        | NA             | NA           | NA           | NA          | NA          | NA        | NA | NA                                                                  | Could not run in BMDS |
| Weibull        | f_resm_9_sev_md4.dax | Wei-BMR10.opt    | NA      | NA                               | NA      | NA               | NA         | NA      | NA         | NA                                      | NA       | NA        | NA             | NA           | NA           | NA          | NA          | NA        | NA | NA                                                                  | Could not run in BMDS |
| Quantal-Linear | f_resm_9_sev_md4.dax | Quant-BMR10.opt  | NA      | NA                               | NA      | NA               | NA         | NA      | NA         | NA                                      | NA       | NA        | NA             | NA           | NA           | NA          | NA          | NA        | NA | NA                                                                  | Could not run in BMDS |

|                             |
|-----------------------------|
| Model excluded from average |
| Reason for model exclusion  |
| Selected model (best fit)   |

### A: Gamma\_f\_oed\_9\_md4\_Gam-BMR10

Gamma Multi-Hit Model, with BMR of 10% Extra Risk for the BMD and 0.95 Lower Confidence Limit for the BMD

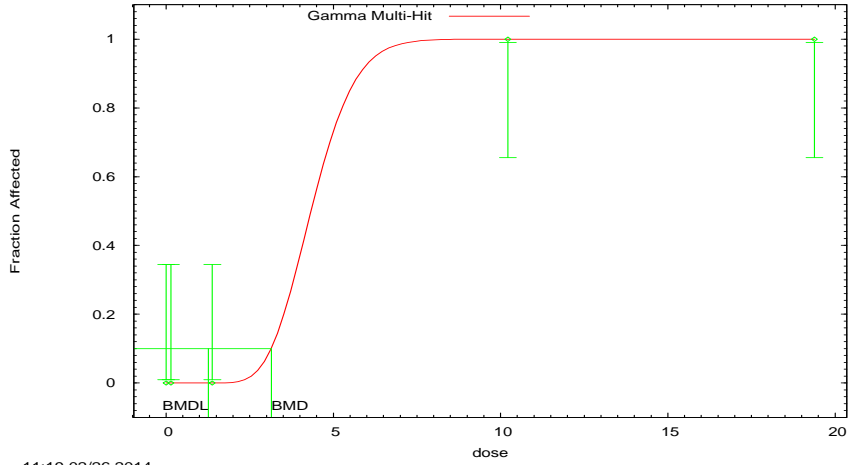

11:19 02/26 2014

### B: Logistic\_f\_oed\_9\_md4\_Log-BMR10

Logistic Model, with BMR of 10% Extra Risk for the BMD and 0.95 Lower Confidence Limit for the BMDL

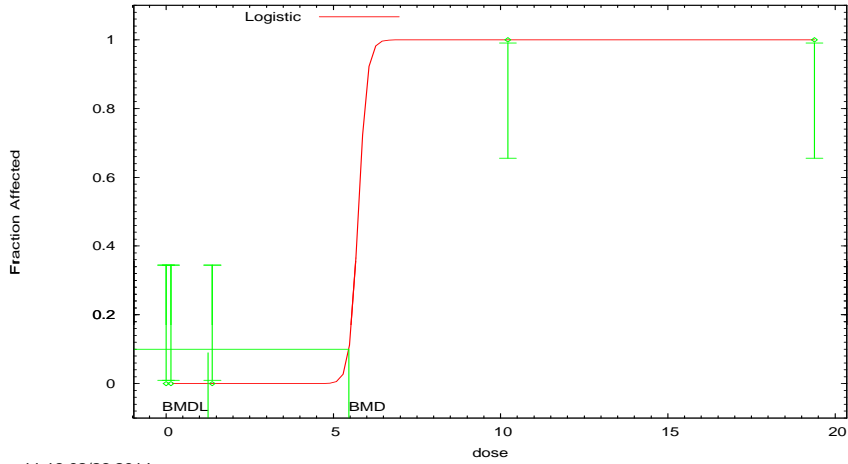

11:19 02/26 2014

### C: LogLogistic\_f\_oed\_9\_md4\_LogLog-BMR10

Log-Logistic Model, with BMR of 10% Extra Risk for the BMD and 0.95 Lower Confidence Limit for the BMDL

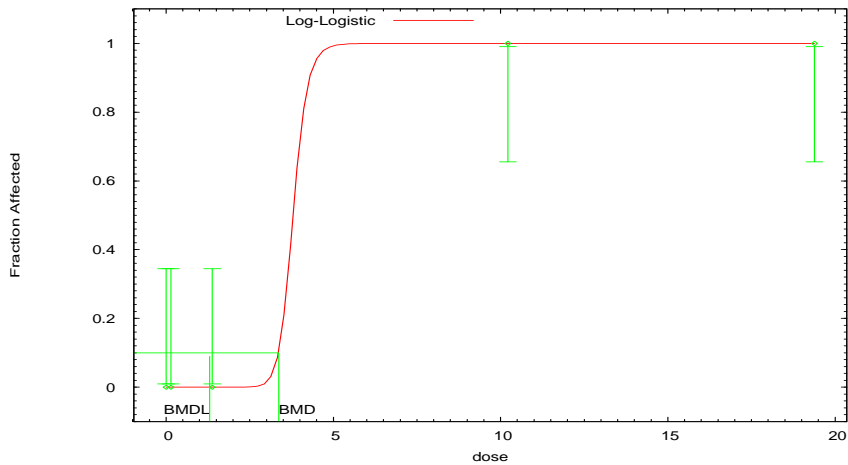

11:19 02/26 2014



### D: Probit\_f\_oed\_9\_md4\_Probit-BMR10

Probit Model, with BMR of 10% Extra Risk for the BMD and 0.95 Lower Confidence Limit for the BMDL

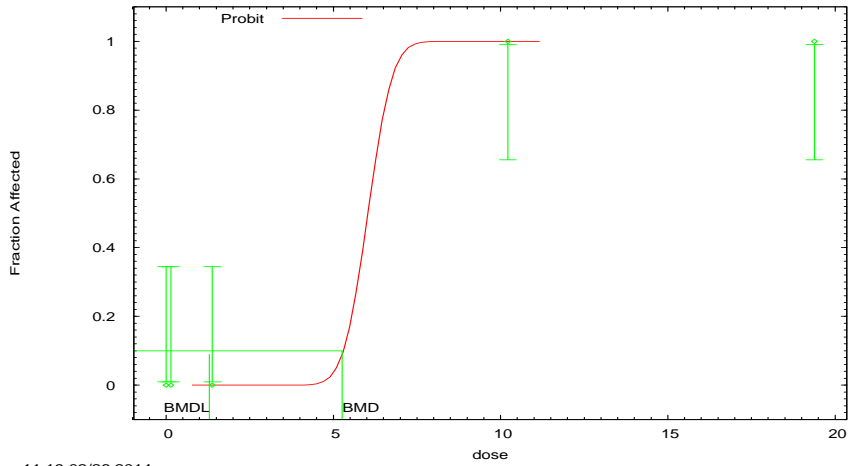

11:19 02/26 2014

### E: LogProbit\_f\_oed\_9\_md4\_LogPro-BMR10

LogProbit Model, with BMR of 10% Extra Risk for the BMD and 0.95 Lower Confidence Limit for the BMDL

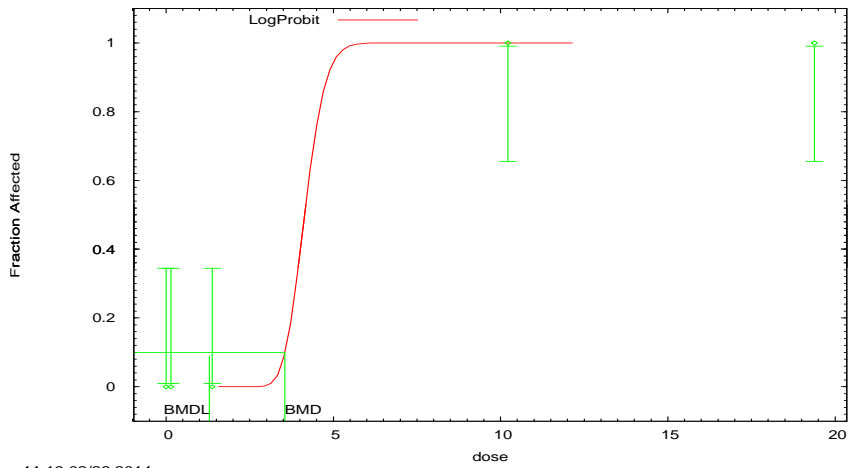

11:19 02/26 2014

### F: Multistage\_f\_oed\_9\_md4\_NCMst1-BMR10

Multistage Model, with BMR of 10% Extra Risk for the BMD and 0.95 Lower Confidence Limit for the BMDL

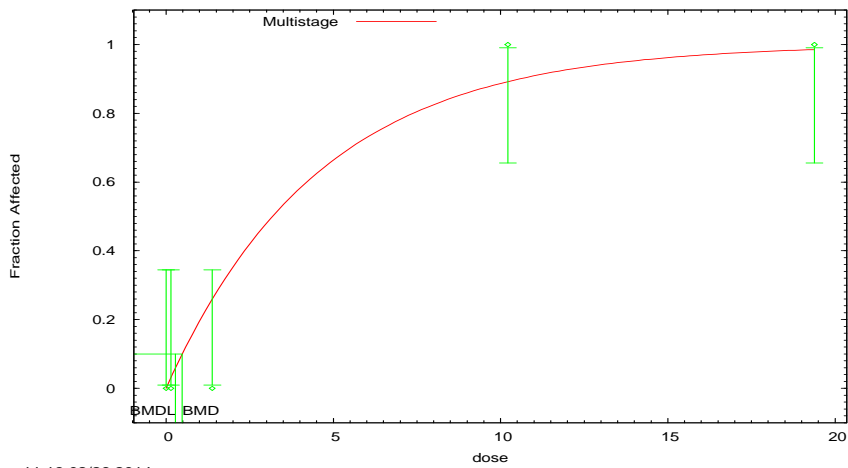

11:19 02/26 2014

**G: Multistage\_f\_oed\_9\_md4\_NCMst2-BMR10**

Multistage Model, with BMR of 10% Extra Risk for the BMD and 0.95 Lower Confidence Limit for the BMDL

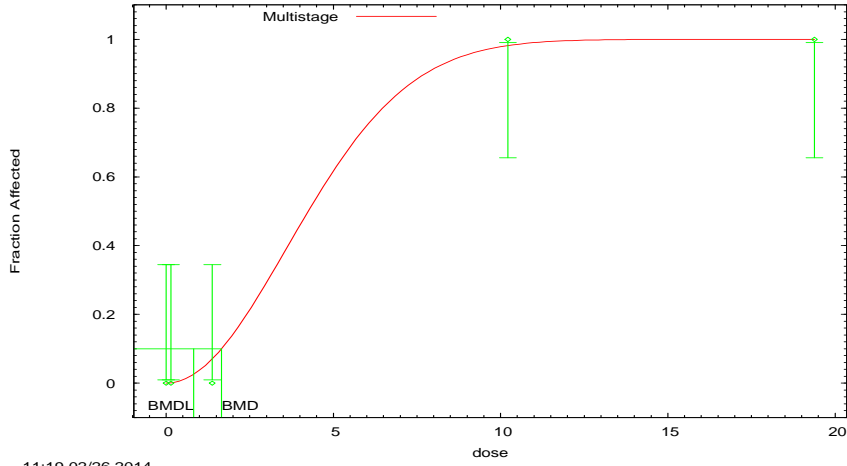

11:19 02/26 2014

**H: Multistage\_f\_oed\_9\_md4\_NCMst3-BMR10**

Multistage Model, with BMR of 10% Extra Risk for the BMD and 0.95 Lower Confidence Limit for the BMDL

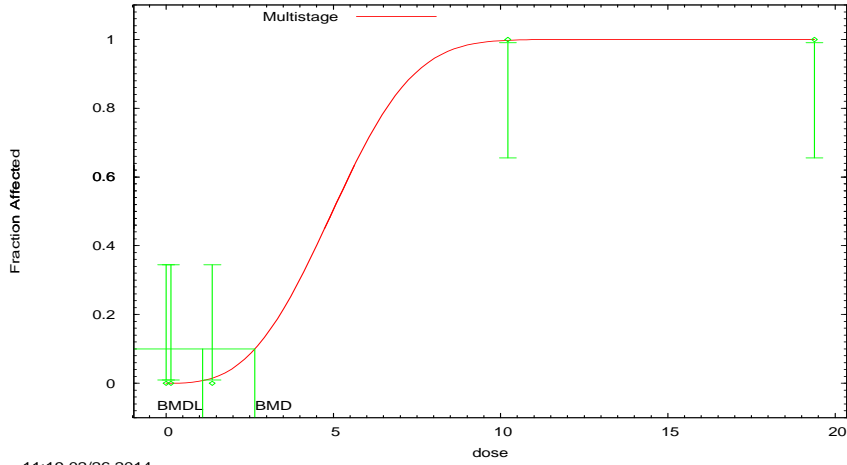

11:19 02/26 2014

**I: Multistage\_f\_oed\_9\_md4\_NCMst4-BMR10**

Multistage Model, with BMR of 10% Extra Risk for the BMD and 0.95 Lower Confidence Limit for the BMDL

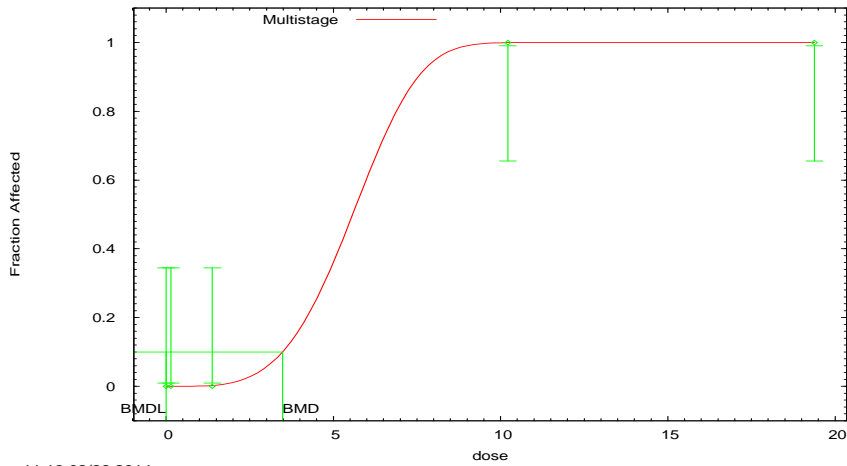

11:19 02/26 2014

### J: Weibull\_f\_oed\_9\_md4\_Wei-BMR10

Weibull Model, with BMR of 10% Extra Risk for the BMD and 0.95 Lower Confidence Limit for the BMDL

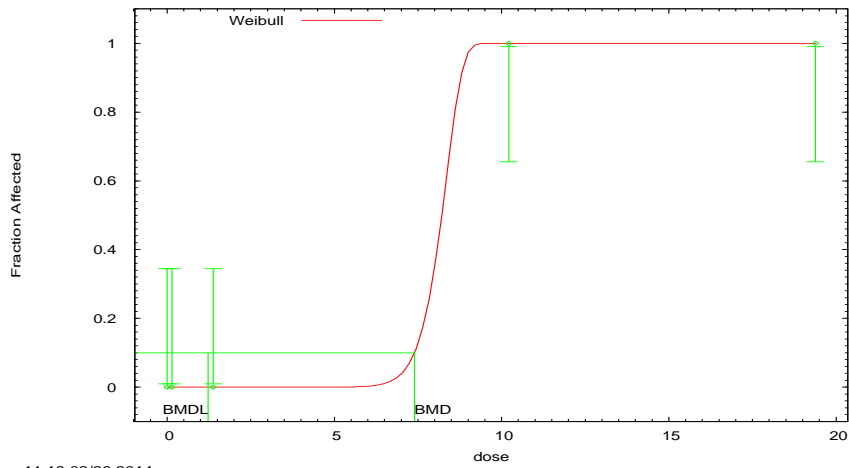

### K: Quantal-Linear\_f\_oed\_9\_md4\_Quant-BMR10

Quantal Linear Model, with BMR of 10% Extra Risk for the BMD and 0.95 Lower Confidence Limit for the BMD

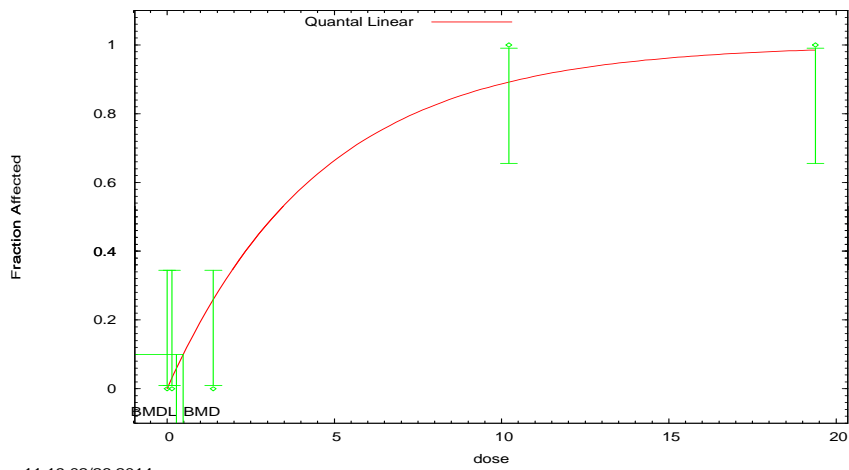

**A: Gamma\_f\_oeH\_9\_md4\_Gam-BMR10**

Gamma Multi-Hit Model, with BMR of 10% Extra Risk for the BMD and 0.95 Lower Confidence Limit for the BMD

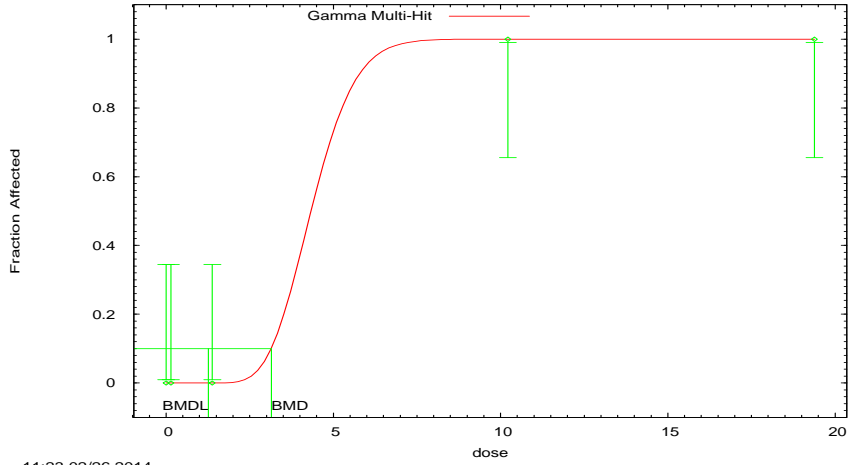

11:23 02/26 2014

**B: Logistic\_f\_oeH\_9\_md4\_Log-BMR10**

Logistic Model, with BMR of 10% Extra Risk for the BMD and 0.95 Lower Confidence Limit for the BMDL

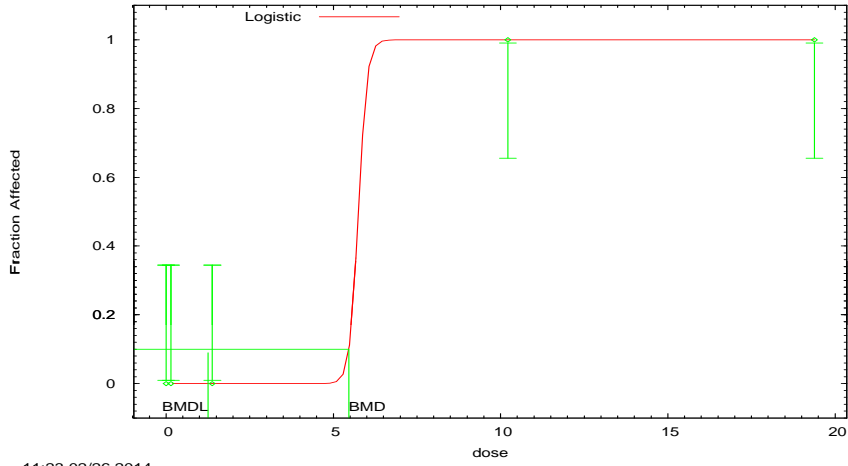

11:23 02/26 2014

**C: LogLogistic\_f\_oeH\_9\_md4\_LogLog-BMR10**

Log-Logistic Model, with BMR of 10% Extra Risk for the BMD and 0.95 Lower Confidence Limit for the BMDL

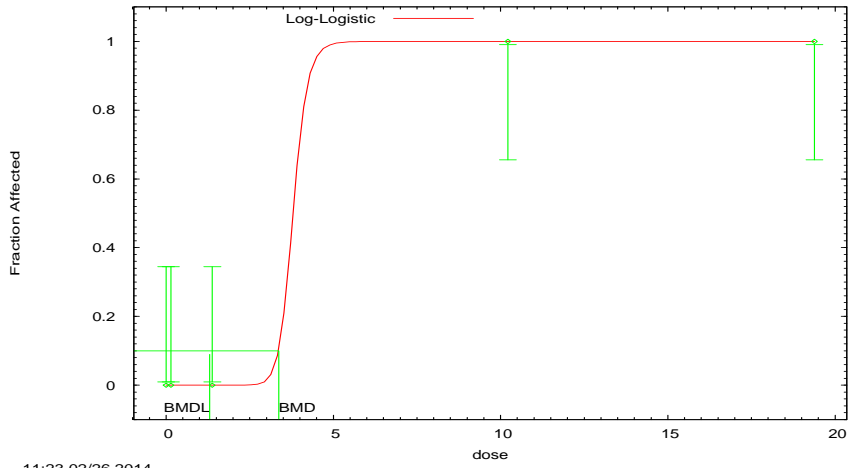

11:23 02/26 2014

### D: Probit\_f\_oeH\_9\_md4\_Probit-BMR10

Probit Model, with BMR of 10% Extra Risk for the BMD and 0.95 Lower Confidence Limit for the BMDL

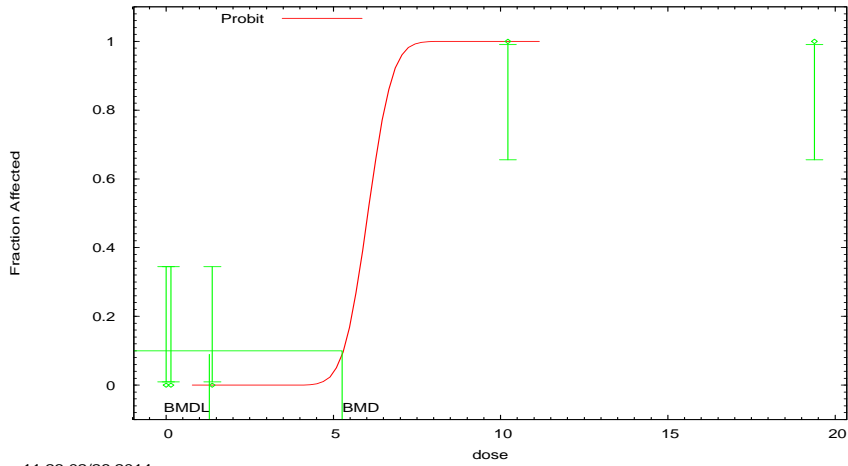

11:23 02/26 2014

### E: LogProbit\_f\_oeH\_9\_md4\_LogPro-BMR10

LogProbit Model, with BMR of 10% Extra Risk for the BMD and 0.95 Lower Confidence Limit for the BMDL

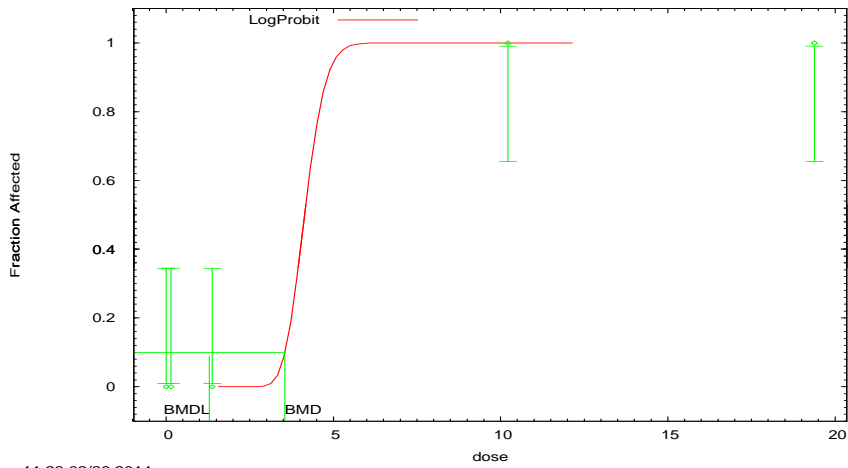

11:23 02/26 2014

### F: Multistage\_f\_oeH\_9\_md4\_NCMst1-BMR10

Multistage Model, with BMR of 10% Extra Risk for the BMD and 0.95 Lower Confidence Limit for the BMDL

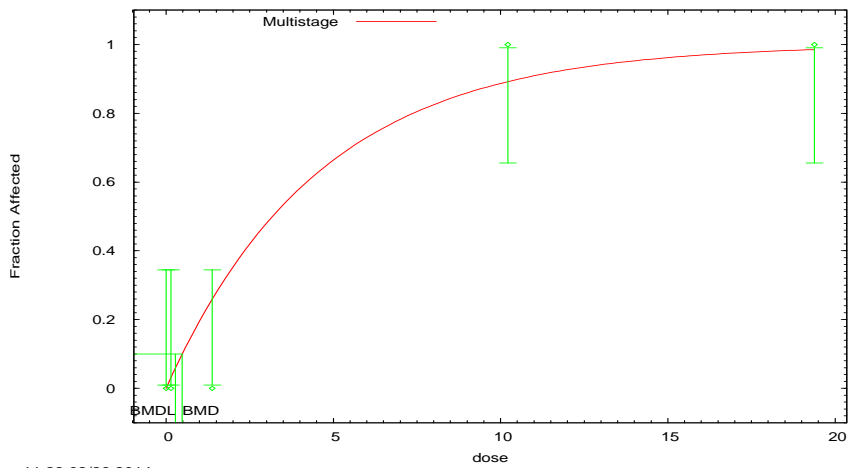

11:23 02/26 2014

**G: Multistage\_f\_oeH\_9\_md4\_NCMst2-BMR10**

Multistage Model, with BMR of 10% Extra Risk for the BMD and 0.95 Lower Confidence Limit for the BMDL

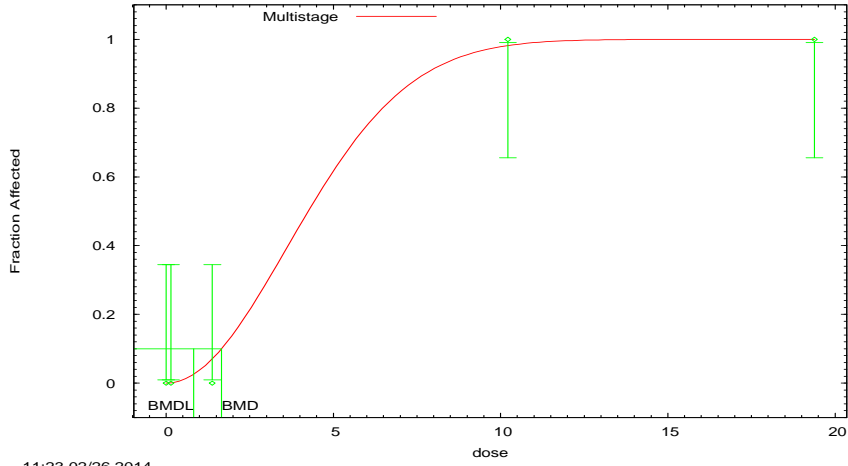

11:23 02/26 2014

**H: Multistage\_f\_oeH\_9\_md4\_NCMst3-BMR10**

Multistage Model, with BMR of 10% Extra Risk for the BMD and 0.95 Lower Confidence Limit for the BMDL

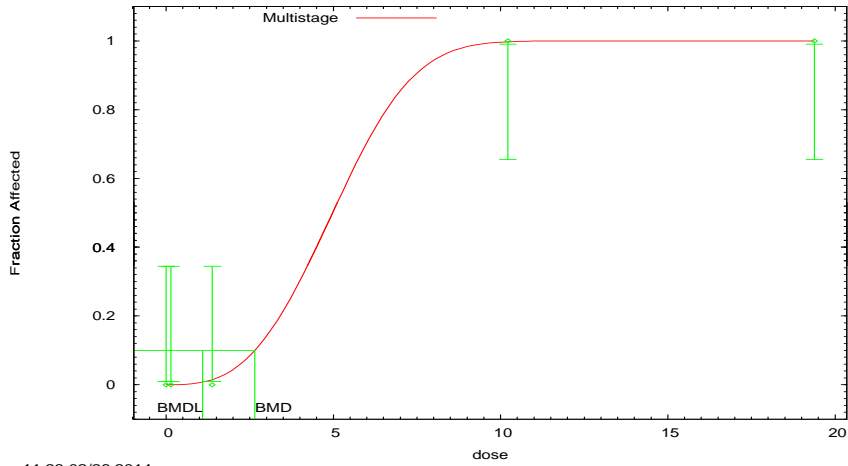

11:23 02/26 2014

**I: Multistage\_f\_oeH\_9\_md4\_NCMst4-BMR10**

Multistage Model, with BMR of 10% Extra Risk for the BMD and 0.95 Lower Confidence Limit for the BMDL

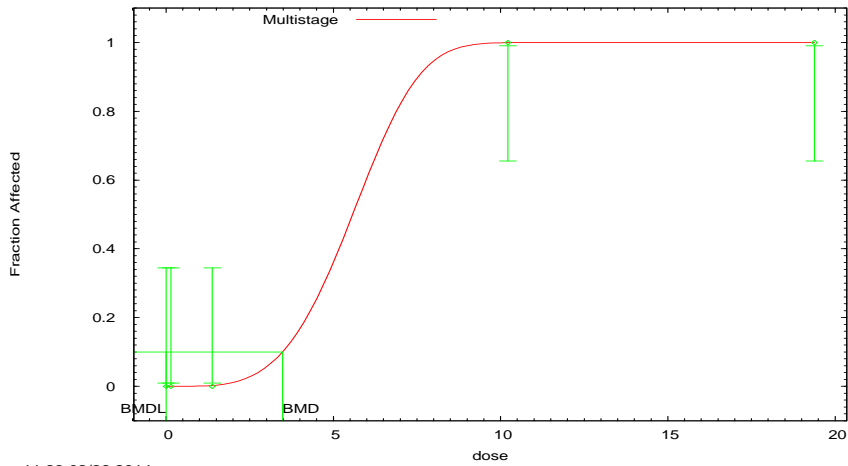

11:23 02/26 2014

**J: Weibull\_f\_oh9\_md4\_Wei-BMR10**

Weibull Model, with BMR of 10% Extra Risk for the BMD and 0.95 Lower Confidence Limit for the BMDL

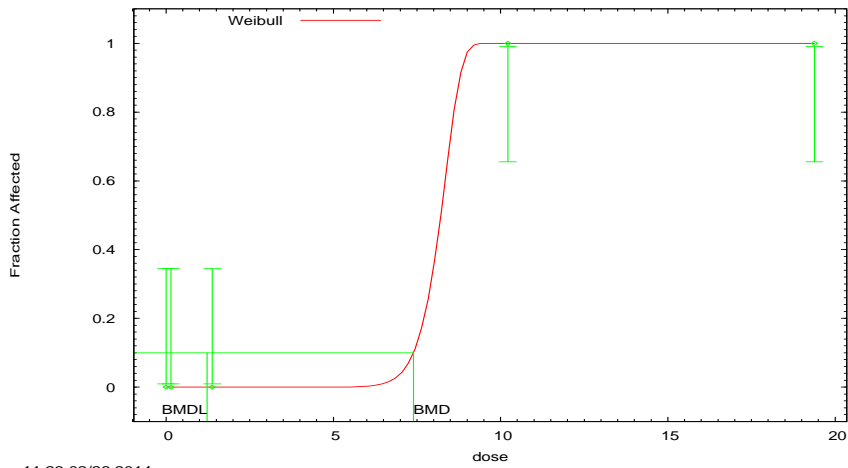

11:23 02/26 2014

**K: Quantal-Linear\_f\_oh9\_md4\_Quant-BMR10**

Quantal Linear Model, with BMR of 10% Extra Risk for the BMD and 0.95 Lower Confidence Limit for the BMD

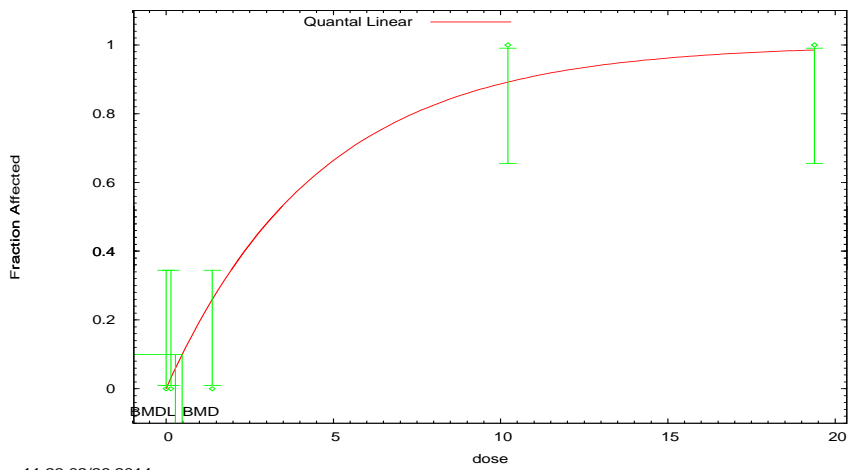

11:23 02/26 2014

### A: Gamma\_f\_reh\_9\_md4\_Gam-BMR10

Gamma Multi-Hit Model, with BMR of 10% Extra Risk for the BMD and 0.95 Lower Confidence Limit for the BMD

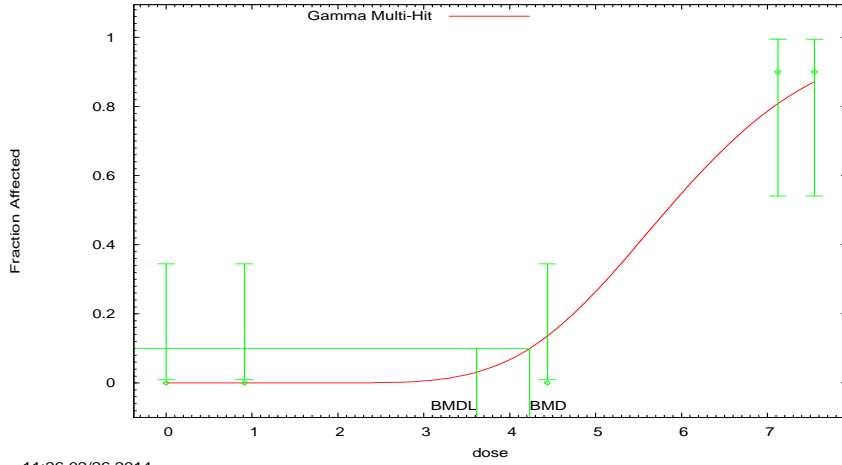

11:26 02/26 2014

### B: Logistic\_f\_reh\_9\_md4\_Log-BMR10

Logistic Model, with BMR of 10% Extra Risk for the BMD and 0.95 Lower Confidence Limit for the BMDL

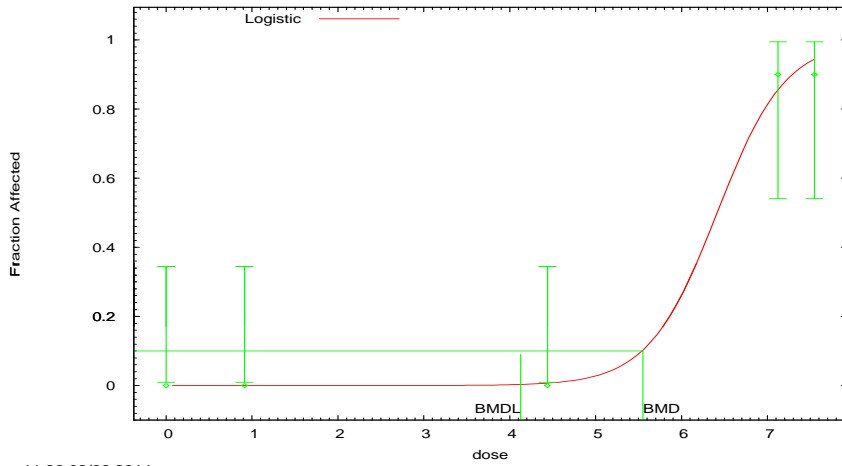

11:26 02/26 2014

### C: LogLogistic\_f\_reh\_9\_md4\_LogLog-BMR10

Log-Logistic Model, with BMR of 10% Extra Risk for the BMD and 0.95 Lower Confidence Limit for the BMDL

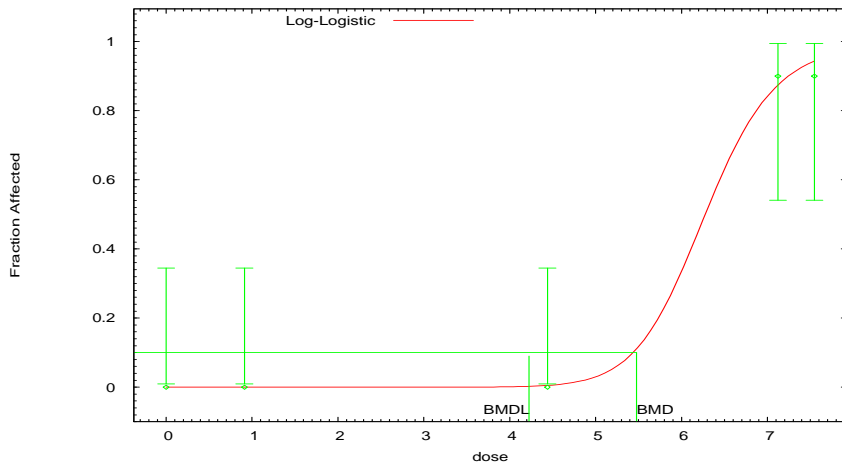

11:26 02/26 2014



**D: Probit\_f\_reh\_9\_md4\_Probit-BMR10**

Probit Model, with BMR of 10% Extra Risk for the BMD and 0.95 Lower Confidence Limit for the BMDL

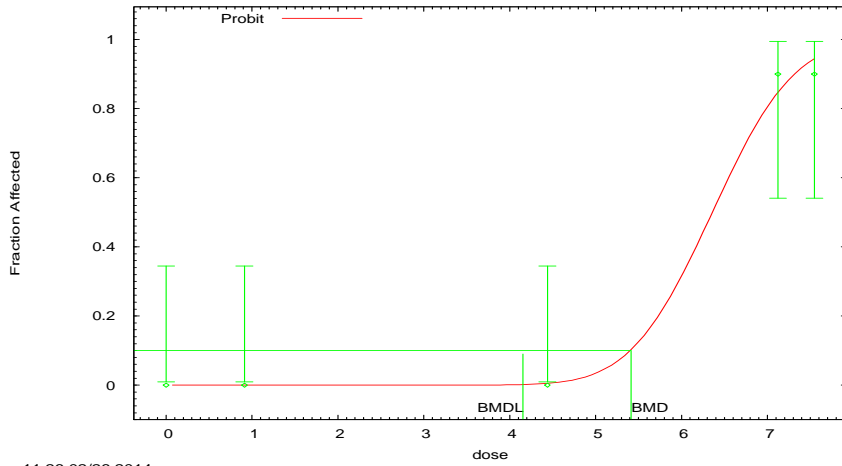

11:26 02/26 2014

**E: LogProbit\_f\_reh\_9\_md4\_LogPro-BMR10**

LogProbit Model, with BMR of 10% Extra Risk for the BMD and 0.95 Lower Confidence Limit for the BMDL

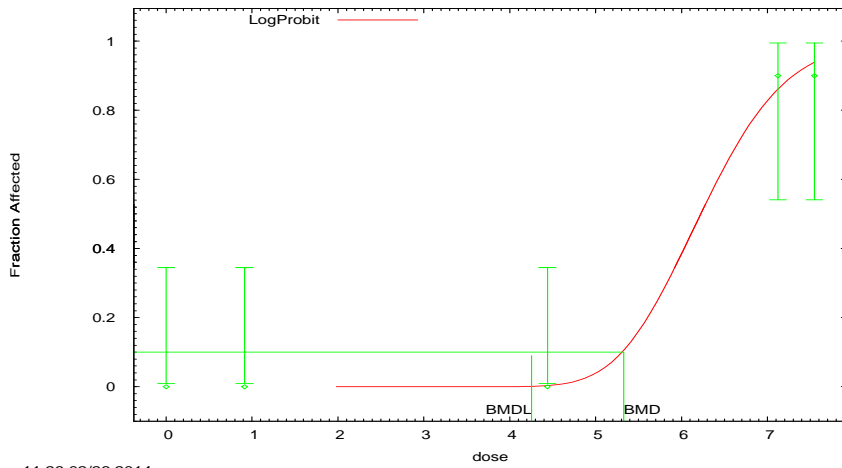

11:26 02/26 2014

**F: Multistage\_f\_reh\_9\_md4\_NCMst1-BMR10**

Multistage Model, with BMR of 10% Extra Risk for the BMD and 0.95 Lower Confidence Limit for the BMDL

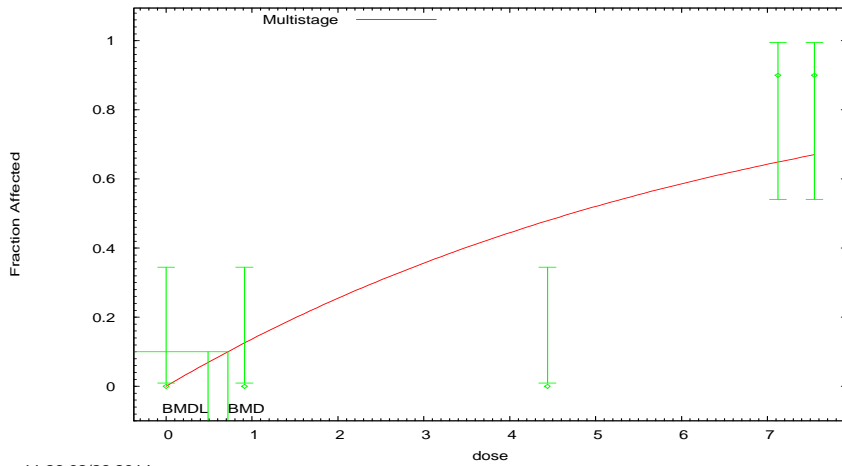

11:26 02/26 2014

### G: Multistage\_f\_reh\_9\_md4\_NCMst2-BMR10

Multistage Model, with BMR of 10% Extra Risk for the BMD and 0.95 Lower Confidence Limit for the BMDL

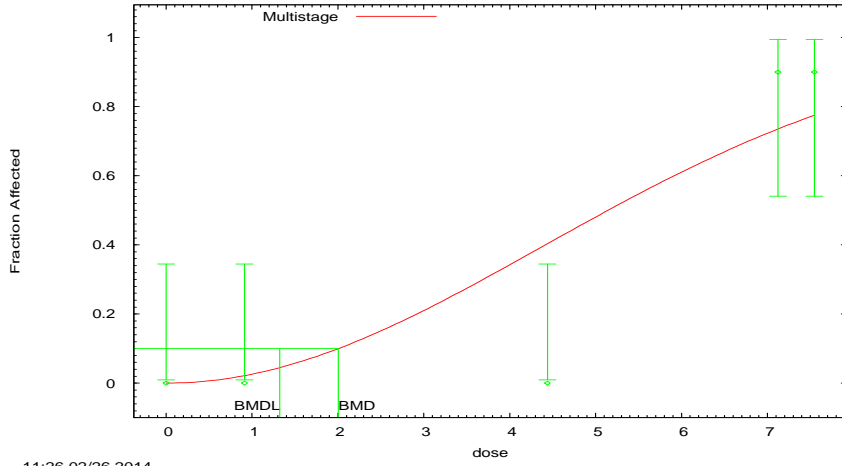

11:26 02/26 2014

### H: Multistage\_f\_reh\_9\_md4\_NCMst3-BMR10

Multistage Model, with BMR of 10% Extra Risk for the BMD and 0.95 Lower Confidence Limit for the BMDL

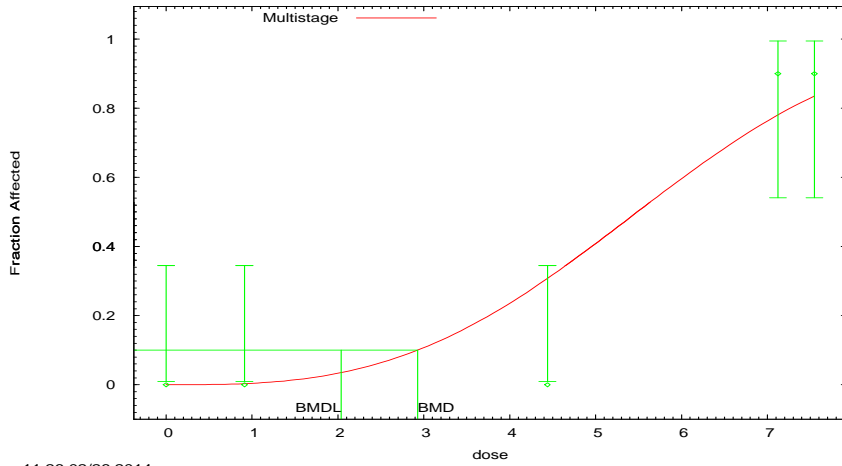

11:26 02/26 2014

### I: Multistage\_f\_reh\_9\_md4\_NCMst4-BMR10

Multistage Model, with BMR of 10% Extra Risk for the BMD and 0.95 Lower Confidence Limit for the BMDL

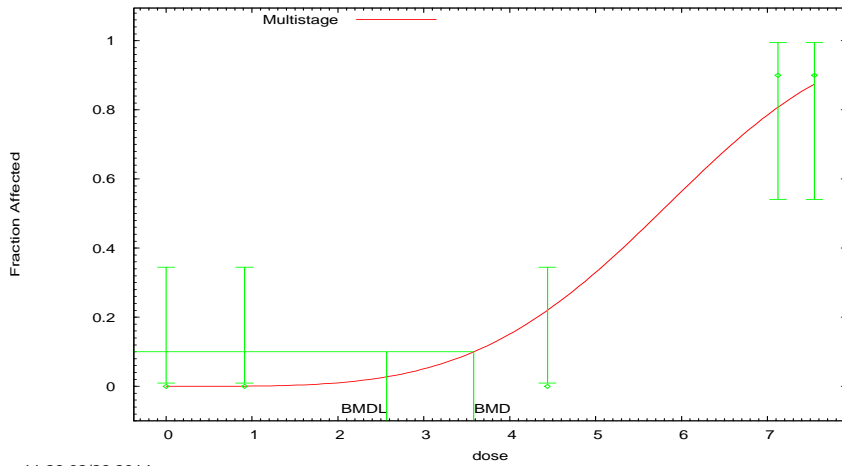

11:26 02/26 2014

**J: Weibull\_f\_reh\_9\_md4\_Wei-BMR10**

Weibull Model, with BMR of 10% Extra Risk for the BMD and 0.95 Lower Confidence Limit for the BMDL

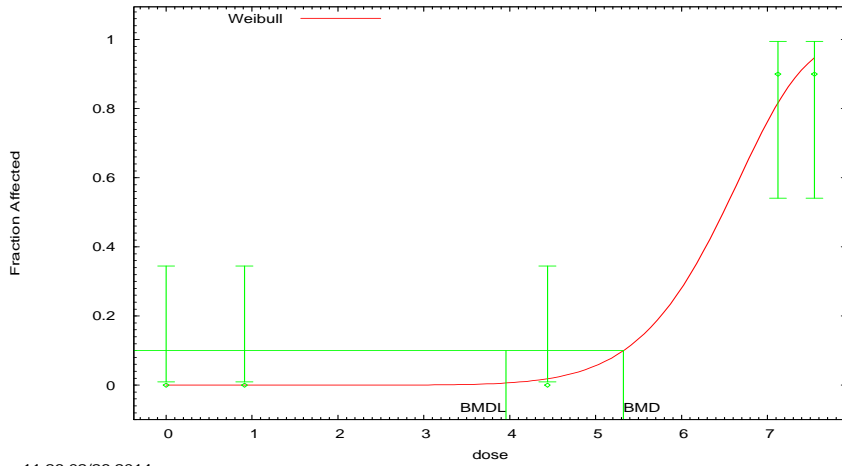

11:26 02/26 2014

**K: Quantal-Linear\_f\_reh\_9\_md4\_Quant-BMR10**

Quantal Linear Model, with BMR of 10% Extra Risk for the BMD and 0.95 Lower Confidence Limit for the BMD

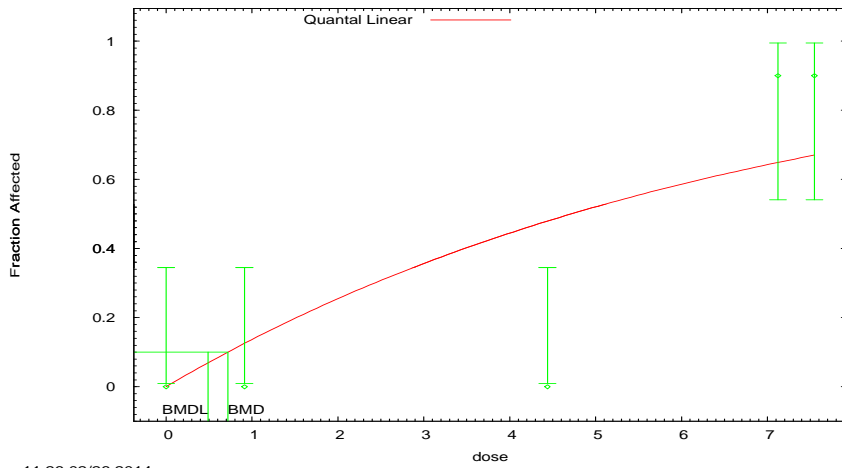

11:26 02/26 2014

### A: Gamma\_f\_resm\_9\_md4\_Gam-BMR10

Gamma Multi-Hit Model, with BMR of 10% Extra Risk for the BMD and 0.95 Lower Confidence Limit for the BMD

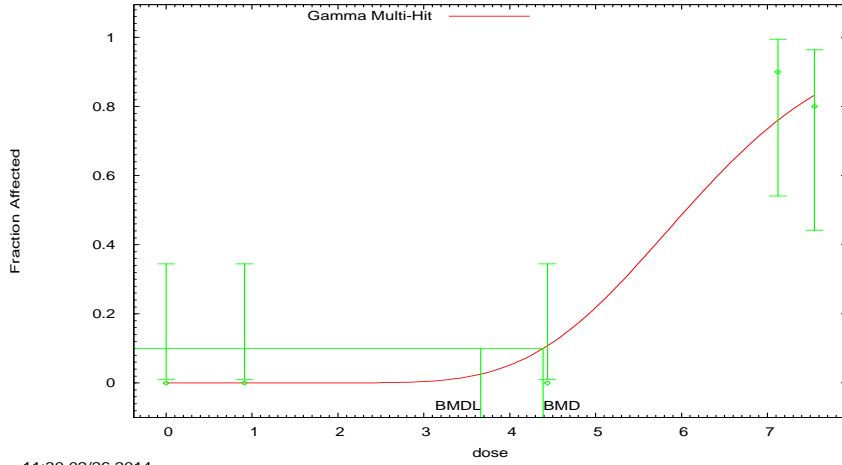

11:30 02/26 2014

### B: Logistic\_f\_resm\_9\_md4\_Log-BMR10

Logistic Model, with BMR of 10% Extra Risk for the BMD and 0.95 Lower Confidence Limit for the BMDL

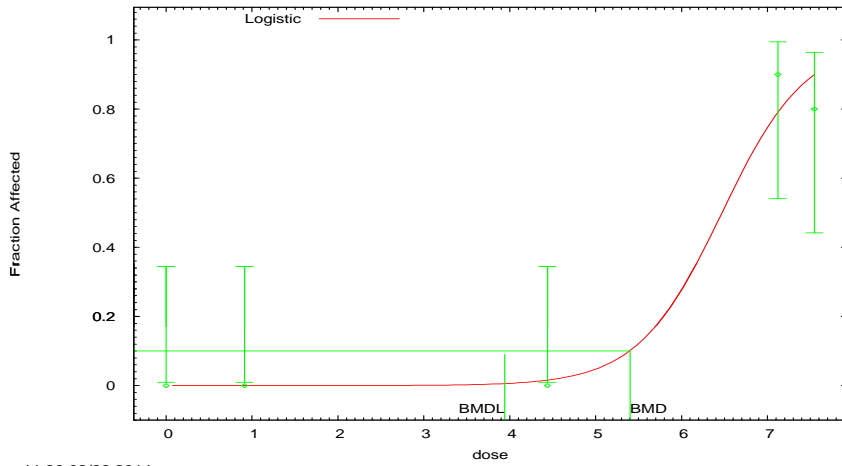

11:30 02/26 2014

### C: LogLogistic\_f\_resm\_9\_md4\_LogLog-BMR10

Log-Logistic Model, with BMR of 10% Extra Risk for the BMD and 0.95 Lower Confidence Limit for the BMDL

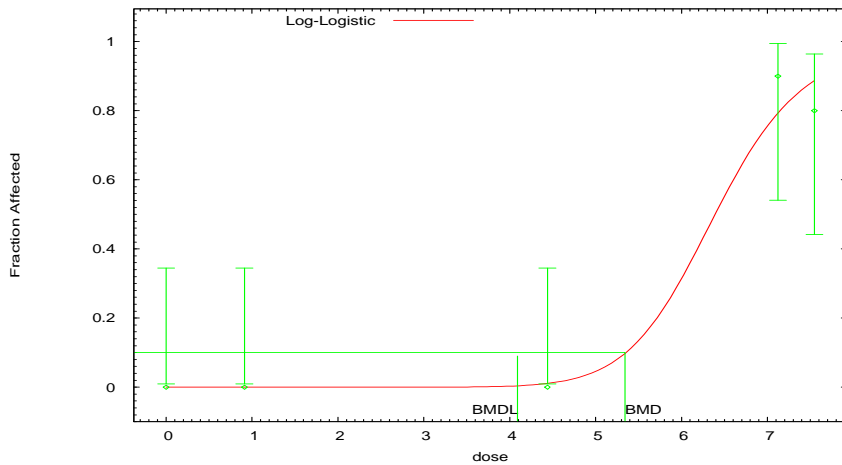

11:30 02/26 2014

**D: Probit\_f\_resm\_9\_md4\_Probit-BMR10**

Probit Model, with BMR of 10% Extra Risk for the BMD and 0.95 Lower Confidence Limit for the BMDL

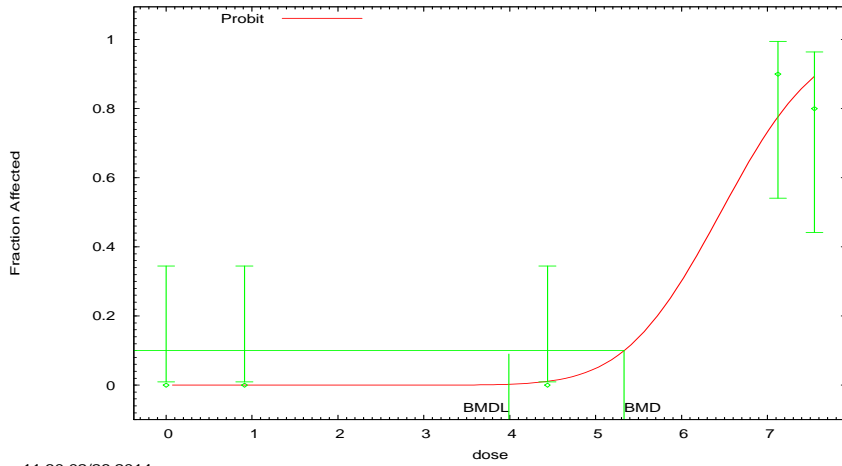

11:30 02/26 2014

**E: LogProbit\_f\_resm\_9\_md4\_LogPro-BMR10**

LogProbit Model, with BMR of 10% Extra Risk for the BMD and 0.95 Lower Confidence Limit for the BMDL

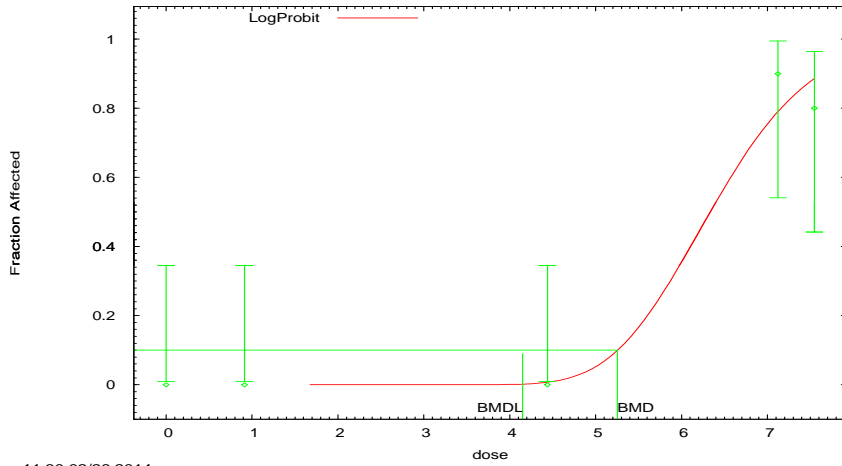

11:30 02/26 2014

**F: Multistage\_f\_resm\_9\_md4\_NCMst1-BMR10**

Multistage Model, with BMR of 10% Extra Risk for the BMD and 0.95 Lower Confidence Limit for the BMDL

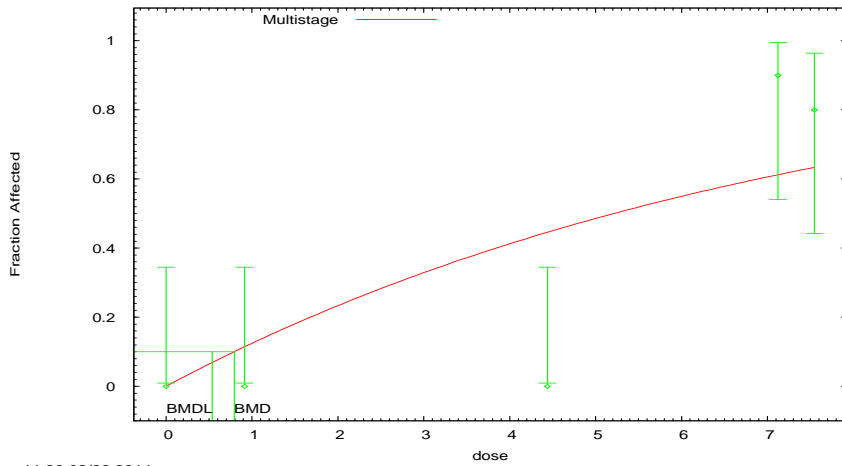

11:30 02/26 2014

**G: Multistage\_f\_resm\_9\_md4\_NCMst2-BMR10**

Multistage Model, with BMR of 10% Extra Risk for the BMD and 0.95 Lower Confidence Limit for the BMDL

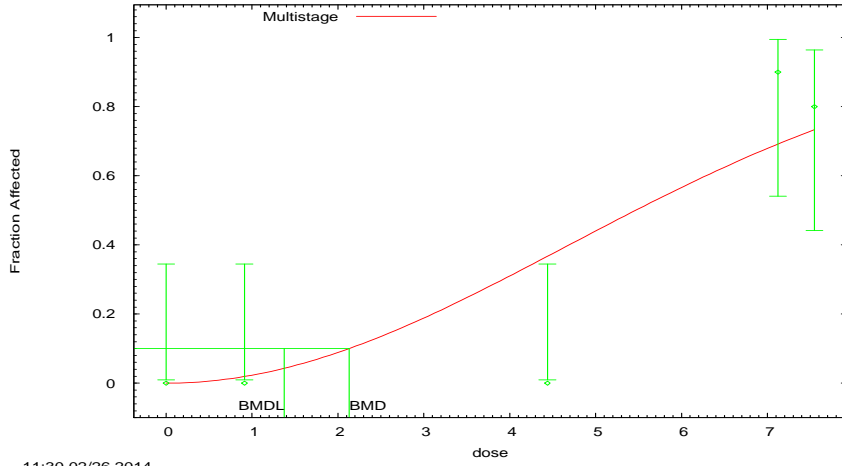

11:30 02/26 2014

**H: Multistage\_f\_resm\_9\_md4\_NCMst3-BMR10**

Multistage Model, with BMR of 10% Extra Risk for the BMD and 0.95 Lower Confidence Limit for the BMDL

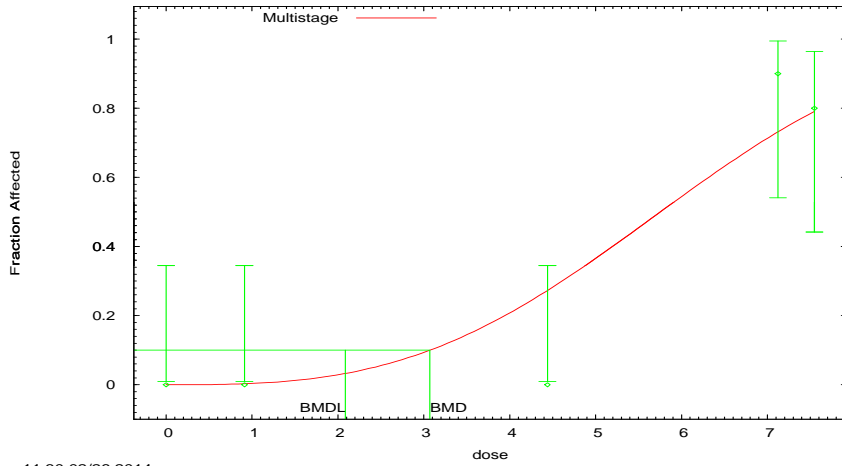

11:30 02/26 2014

**I: Multistage\_f\_resm\_9\_md4\_NCMst4-BMR10**

Multistage Model, with BMR of 10% Extra Risk for the BMD and 0.95 Lower Confidence Limit for the BMDL

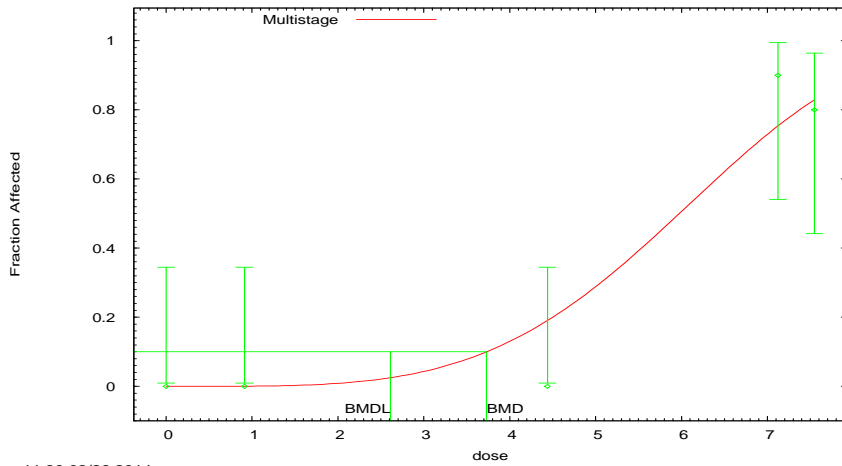

11:30 02/26 2014

**J: Weibull\_f\_resm\_9\_md4\_Wei-BMR10**

Weibull Model, with BMR of 10% Extra Risk for the BMD and 0.95 Lower Confidence Limit for the BMDL

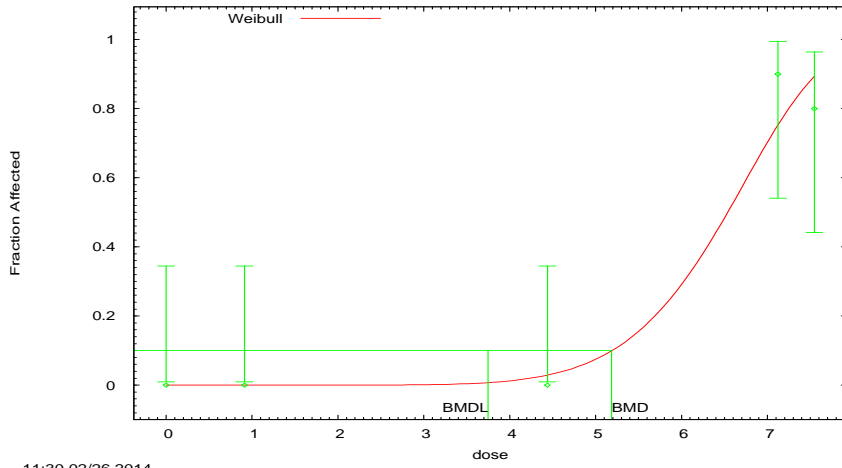

11:30 02/26 2014

**K: Quantal-Linear\_f\_resm\_9\_md4\_Quant-BMR10**

Quantal Linear Model, with BMR of 10% Extra Risk for the BMD and 0.95 Lower Confidence Limit for the BMD

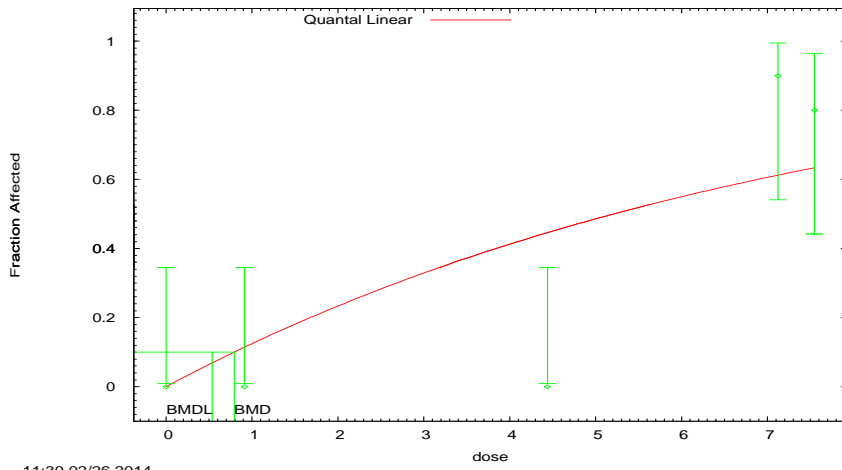

11:30 02/26 2014

## Quantitative Consideration of the Severity of Lesions Using Quantal BMDs Modeling Techniques

### Male REH Lesions in the Subchronic (90-Day) Dodd et al. (2012) Study

| Group                | 1  | 2        | 3        | 4        | 5        |
|----------------------|----|----------|----------|----------|----------|
| Amt Mtb (nmol/min-g) | 0  | 0.912448 | 4.438954 | 7.122926 | 7.547781 |
| Number Examined      | 10 | 10       | 10       | 10       | 10       |
| With m_reh lesion*   | 0  | 0        | 10       | 10       | 10       |
| Severity 1           | 0  | 0        | 10       | 6        | 6        |
| Severity 2           | 0  | 0        | 0        | 4        | 4        |
| Severity 3           | 0  | 0        | 0        | 0        | 0        |
| Severity 4           | 0  | 0        | 0        | 0        | 0        |
| Severity 5           | 0  | 0        | 0        | 0        | 0        |
| Average Severity     | -- | --       | 1.00     | 1.40     | 1.40     |

  

| m_reh_9_md4 |            |                      |    |          |          |
|-------------|------------|----------------------|----|----------|----------|
| Group       | Conc (ppm) | Amt Mtb (nmol/min-g) | N  | Effect 1 | Effect 2 |
| 1           | 0          | 0.000                | 10 | 0        | 0        |
| 2           | 0.1        | 0.912                | 10 | 0        | 0        |
| 3           | 1          | 4.439                | 10 | 10       | 0        |
| 4           | 10         | 7.123                | 10 | 10       | 4        |
| 5           | 30         | 7.548                | 10 | 10       | 4        |

  

|                    |      |      |
|--------------------|------|------|
| BMD <sub>10</sub>  | 2.00 | 5.84 |
| BMDL <sub>10</sub> | 0.78 | 3.80 |

Dodd et al. Scale (1-5): 1= minimal, 2 = slight/mild, 3 = moderate, 4 = moderately severe, 5 = severe/high

\*Level 2, Transitional respiratory epithelium hyperplasia

### Male RESM Lesions in the Subchronic (90-Day) Dodd et al. (2012) Study

| Group                | 1  | 2        | 3        | 4        | 5        |
|----------------------|----|----------|----------|----------|----------|
| Amt Mtb (nmol/min-g) | 0  | 0.912448 | 4.438954 | 7.122926 | 7.547781 |
| Number Examined      | 10 | 10       | 10       | 10       | 10       |
| With m_resm lesion*  | 0  | 0        | 0        | 8        | 8        |
| Severity 1           | 0  | 0        | 0        | 7        | 8        |
| Severity 2           | 0  | 0        | 0        | 1        | 0        |
| Severity 3           | 0  | 0        | 0        | 0        | 0        |
| Severity 4           | 0  | 0        | 0        | 0        | 0        |
| Severity 5           | 0  | 0        | 0        | 0        | 0        |
| Average Severity     | -- | --       | --       | 0.90     | 0.80     |

  

| m_resm_9_md4 |            |                      |    |          |          |
|--------------|------------|----------------------|----|----------|----------|
| Group        | Conc (ppm) | Amt Mtb (nmol/min-g) | N  | Effect 1 | Effect 2 |
| 1            | 0          | 0.000                | 10 | 0        | 0        |
| 2            | 0.1        | 0.912                | 10 | 0        | 0        |
| 3            | 1          | 4.439                | 10 | 0        | 0        |
| 4            | 10         | 7.123                | 10 | 8        | 1        |
| 5            | 30         | 7.548                | 10 | 8        | 0        |

  

|                    |      |    |
|--------------------|------|----|
| BMD <sub>10</sub>  | 5.12 | -- |
| BMDL <sub>10</sub> | 3.82 | -- |

Dodd et al. Scale (1-5): 1= minimal, 2 = slight/mild, 3 = moderate, 4 = moderately severe, 5 = severe/high

\*Level 2, Transitional respiratory epithelium squamous metaplasia



### Male OED Lesions in the Subchronic (90-Day) Dodd et al. (2012) Study

| Group                | 1  | 2        | 3        | 4        | 5        |
|----------------------|----|----------|----------|----------|----------|
| Amt Mtb (nmol/min-g) | 0  | 0.141975 | 1.380519 | 10.21883 | 19.38274 |
| Number Examined      | 10 | 10       | 10       | 10       | 10       |
| With m_oed lesion*   | 0  | 0        | 0        | 10       | 10       |
| Severity 1           | 0  | 0        | 0        | 1        | 0        |
| Severity 2           | 0  | 0        | 0        | 9        | 3        |
| Severity 3           | 0  | 0        | 0        | 0        | 7        |
| Severity 4           | 0  | 0        | 0        | 0        | 0        |
| Severity 5           | 0  | 0        | 0        | 0        | 0        |
| Average Severity     | -- | --       | --       | 1.90     | 2.70     |

  

| m_oed_9_md4 |            |                      |    |          |          |
|-------------|------------|----------------------|----|----------|----------|
| Group       | Conc (ppm) | Amt Mtb (nmol/min-g) | N  | Effect 1 | Effect 2 |
| 1           | 0          | 0.000                | 10 | 0        | 0        |
| 2           | 0.1        | 0.142                | 10 | 0        | 0        |
| 3           | 1          | 1.381                | 10 | 0        | 0        |
| 4           | 10         | 10.219               | 10 | 10       | 9        |
| 5           | 30         | 19.383               | 10 | 10       | 10       |

  

|                    |      |      |
|--------------------|------|------|
| BMD <sub>10</sub>  | 4.41 | 6.83 |
| BMDL <sub>10</sub> | 1.25 | 1.60 |

Dodd et al. Scale (1-5): 1= minimal, 2 = slight/mild, 3 = moderate, 4 = moderately severe, 5 = severe/high

*\*Max severity of Levels 2-5, Olfactory epithelium degeneration*

### Male OEH Lesions in the Subchronic (90-Day) Dodd et al. (2012) Study

| Group                | 1  | 2        | 3        | 4        | 5        |
|----------------------|----|----------|----------|----------|----------|
| Amt Mtb (nmol/min-g) | 0  | 0.141975 | 1.380519 | 10.21883 | 19.38274 |
| Number Examined      | 10 | 10       | 10       | 10       | 10       |
| With m_oeh lesion*   | 0  | 0        | 0        | 10       | 10       |
| Severity 1           | 0  | 0        | 0        | 6        | 0        |
| Severity 2           | 0  | 0        | 0        | 3        | 9        |
| Severity 3           | 0  | 0        | 0        | 0        | 1        |
| Severity 4           | 0  | 0        | 0        | 0        | 0        |
| Severity 5           | 0  | 0        | 0        | 0        | 0        |
| Average Severity     | -- | --       | --       | 1.20     | 2.10     |

  

| m_oeh_9_md4 |            |                      |    |          |          |
|-------------|------------|----------------------|----|----------|----------|
| Group       | Conc (ppm) | Amt Mtb (nmol/min-g) | N  | Effect 1 | Effect 2 |
| 1           | 0          | 0.000                | 10 | 0        | 0        |
| 2           | 0.1        | 0.142                | 10 | 0        | 0        |
| 3           | 1          | 1.381                | 10 | 0        | 0        |
| 4           | 10         | 10.219               | 10 | 9        | 3        |
| 5           | 30         | 19.383               | 10 | 10       | 10       |

  

|                    |      |      |
|--------------------|------|------|
| BMD <sub>10</sub>  | 6.83 | 8.84 |
| BMDL <sub>10</sub> | 1.60 | 5.04 |

Dodd et al. Scale (1-5): 1= minimal, 2 = slight/mild, 3 = moderate, 4 = moderately severe, 5 = severe/high

*\*Max severity of Levels 2-5, Olfactory epithelium hyperplasia*

#### Notes:

Effect 1 = Incidence of all lesions

Effect 2 = Incidence of lesions having a severity  $\geq 2$ .

BMDs = Average BMD (or BMDL) in nmol/min-g tissue

| Model Name     | Data File Name      | Option File Name | AIC     | Inputs + Estimates + Scaled Res. | P-value | Specified Effect | Risk Type  | BMD     | BMDL (POD) | Scaled residual for dose group near BMD | Δ BMD    | Δ BMD:POD | Consider Model | POD selected | Selected POD | Average BMD | Average POD | POD Range | N  | Model Note                                                          |
|----------------|---------------------|------------------|---------|----------------------------------|---------|------------------|------------|---------|------------|-----------------------------------------|----------|-----------|----------------|--------------|--------------|-------------|-------------|-----------|----|---------------------------------------------------------------------|
| Gamma          | m_oed_9_md4.dax     | Gam-BMR10.opt    | 2.00077 | Array                            | 1       | 0.1              | Extra risk | 3.14545 | 1.25963    | -0.016                                  | 1.88582  | 1.497122  | Y              | N            | --           | --          | --          | --        | -- |                                                                     |
| Logistic       | m_oed_9_md4.dax     | Log-BMR10.opt    | 4       | Array                            | 1       | 0.1              | Extra risk | 5.46189 | 1.2495     | 0                                       | 4.21239  | 3.371261  | Y              | N            | --           | --          | --          | --        | -- |                                                                     |
| LogLogistic    | m_oed_9_md4.dax     | LogLog-BMR10.opt | 2       | Array                            | 1       | 0.1              | Extra risk | 3.36446 | 1.29844    | 0                                       | 2.06602  | 1.591156  | Y              | Y            | 1.29844      | 4.4050143   | 1.24518857  | 0.20682   | 7  | Selected over Weibull because of smaller delta BMD                  |
| Probit         | m_oed_9_md4.dax     | Probit-BMR10.opt | 4       | Array                            | 1       | 0.1              | Extra risk | 5.26349 | 1.29435    | 0                                       | 3.96914  | 3.066512  | Y              | N            | --           | --          | --          | --        | -- |                                                                     |
| LogProbit      | m_oed_9_md4.dax     | LogPro-BMR10.opt | 4       | Array                            | 1       | 0.1              | Extra risk | 3.54958 | 1.29456    | 0                                       | 2.25502  | 1.74192   | Y              | N            | --           | --          | --          | --        | -- |                                                                     |
| Multistage     | m_oed_9_md4.dax     | NCMst1-BMR10.opt | 11.2155 | Array                            | 0.269   | 0.1              | Extra risk | 0.48343 | 0.279612   | -0.561                                  | 0.203816 | 0.728924  | N              | N            | --           | --          | --          | --        | -- | Outlier AIC                                                         |
| Multistage     | m_oed_9_md4.dax     | NCMst2-BMR10.opt | 3.84618 | Array                            | 0.9169  | 0.1              | Extra risk | 1.65623 | 0.823198   | -0.872                                  | 0.833032 | 1.011946  | N              | N            | --           | --          | --          | --        | -- | Not selected as Multistage because another has better fit           |
| Multistage     | m_oed_9_md4.dax     | NCMst3-BMR10.opt | 2.34613 | Array                            | 0.9964  | 0.1              | Extra risk | 2.65493 | 1.09162    | -0.387                                  | 1.56331  | 1.432101  | Y              | N            | --           | --          | --          | --        | -- | Selected as Multistage because has smallest AIC and largest P value |
| Multistage     | m_oed_9_md4.dax     | NCMst4-BMR10.opt | 2.0602  | Array                            | 0.9999  | 0.1              | Extra risk | 3.48114 | 0          | -0.162                                  | 3.48114  | #DIV/0!   | N              | N            | --           | --          | --          | --        | -- | BMDL = 0                                                            |
| Weibull        | m_oed_9_md4.dax     | Wei-BMR10.opt    | 2       | Array                            | 1       | 0.1              | Extra risk | 7.3953  | 1.22822    | 0                                       | 6.16708  | 5.021153  | Y              | N            | --           | --          | --          | --        | -- |                                                                     |
| Quantal-Linear | m_oed_9_md4.dax     | Quant-BMR10.opt  | 11.2155 | Array                            | 0.269   | 0.1              | Extra risk | 0.48343 | 0.279612   | -0.561                                  | 0.203817 | 0.728928  | N              | N            | --           | --          | --          | --        | -- | Outlier AIC                                                         |
| Gamma          | m_oed_9_sev_md4.dax | Gam-BMR10.opt    | 8.5017  | Array                            | 1       | 0.1              | Extra risk | 5.55041 | 1.22934    | 0                                       | 4.32107  | 3.514951  | Y              | N            | --           | --          | --          | --        | -- |                                                                     |
| Logistic       | m_oed_9_sev_md4.dax | Log-BMR10.opt    | 10.5017 | Array                            | 1       | 0.1              | Extra risk | 8.46206 | 2.61077    | 0                                       | 5.85129  | 2.241212  | Y              | N            | --           | --          | --          | --        | -- |                                                                     |
| LogLogistic    | m_oed_9_sev_md4.dax | LogLog-BMR10.opt | 8.50168 | Array                            | 1       | 0.1              | Extra risk | 8.00536 | 1.34107    | 0                                       | 6.66429  | 4.969383  | Y              | Y            | 1.34107      | 6.8309243   | 1.60080429  | 1.43002   | 7  |                                                                     |
| Probit         | m_oed_9_sev_md4.dax | Probit-BMR10.opt | 10.5017 | Array                            | 1       | 0.1              | Extra risk | 7.03108 | 2.32816    | 0                                       | 4.70292  | 2.020016  | Y              | N            | --           | --          | --          | --        | -- |                                                                     |
| LogProbit      | m_oed_9_sev_md4.dax | LogPro-BMR10.opt | 10.5017 | Array                            | 1       | 0.1              | Extra risk | 7.1478  | 1.30697    | 0                                       | 5.84083  | 4.468986  | Y              | N            | --           | --          | --          | --        | -- |                                                                     |
| Multistage     | m_oed_9_sev_md4.dax | NCMst1-BMR10.opt | 14.8856 | Array                            | 0.4541  | 0.1              | Extra risk | 0.60426 | 0.369705   | -0.501                                  | 0.234553 | 0.634433  | N              | N            | --           | --          | --          | --        | -- | Outlier AIC                                                         |
| Multistage     | m_oed_9_sev_md4.dax | NCMst2-BMR10.opt | 9.33136 | Array                            | 0.9797  | 0.1              | Extra risk | 2.25548 | 0.947395   | -0.635                                  | 1.308085 | 1.380718  | N              | N            | --           | --          | --          | --        | -- | Not selected as Multistage because another has better fit           |
| Multistage     | m_oed_9_sev_md4.dax | NCMst3-BMR10.opt | 8.6149  | Array                            | 0.9996  | 0.1              | Extra risk | 3.66674 | 1.14535    | -0.238                                  | 2.52139  | 2.201414  | N              | N            | --           | --          | --          | --        | -- | Not selected as Multistage because another has better fit           |
| Multistage     | m_oed_9_sev_md4.dax | NCMst4-BMR10.opt | 8.51701 | Array                            | 1       | 0.1              | Extra risk | 4.72787 | 1.18075    | -0.088                                  | 3.54712  | 3.004124  | Y              | N            | --           | --          | --          | --        | -- | Selected as Multistage because has smallest AIC and largest P value |
| Weibull        | m_oed_9_sev_md4.dax | Wei-BMR10.opt    | 10.5017 | Array                            | 1       | 0.1              | Extra risk | 6.89189 | 1.20857    | 0                                       | 5.68332  | 4.702516  | Y              | N            | --           | --          | --          | --        | -- |                                                                     |
| Quantal-Linear | m_oed_9_sev_md4.dax | Quant-BMR10.opt  | 14.8856 | Array                            | 0.4541  | 0.1              | Extra risk | 0.60425 | 0.369704   | -0.501                                  | 0.23455  | 0.634426  | N              | N            | --           | --          | --          | --        | -- | Outlier AIC                                                         |
| Gamma          | m_oe_h_9_md4.dax    | Gam-BMR10.opt    | 8.5017  | Array                            | 1       | 0.1              | Extra risk | 5.55041 | 1.22934    | 0                                       | 4.32107  | 3.514951  | Y              | N            | --           | --          | --          | --        | -- |                                                                     |
| Logistic       | m_oe_h_9_md4.dax    | Log-BMR10.opt    | 10.5017 | Array                            | 1       | 0.1              | Extra risk | 8.46206 | 2.61077    | 0                                       | 5.85129  | 2.241212  | Y              | N            | --           | --          | --          | --        | -- |                                                                     |
| LogLogistic    | m_oe_h_9_md4.dax    | LogLog-BMR10.opt | 8.50168 | Array                            | 1       | 0.1              | Extra risk | 8.00536 | 1.34107    | 0                                       | 6.66429  | 4.969383  | Y              | Y            | 1.34107      | 6.8309243   | 1.60080429  | 1.43002   | 7  |                                                                     |
| Probit         | m_oe_h_9_md4.dax    | Probit-BMR10.opt | 10.5017 | Array                            | 1       | 0.1              | Extra risk | 7.03108 | 2.32816    | 0                                       | 4.70292  | 2.020016  | Y              | N            | --           | --          | --          | --        | -- |                                                                     |
| LogProbit      | m_oe_h_9_md4.dax    | LogPro-BMR10.opt | 10.5017 | Array                            | 1       | 0.1              | Extra risk | 7.1478  | 1.30697    | 0                                       | 5.84083  | 4.468986  | Y              | N            | --           | --          | --          | --        | -- |                                                                     |
| Multistage     | m_oe_h_9_md4.dax    | NCMst1-BMR10.opt | 14.8856 | Array                            | 0.4541  | 0.1              | Extra risk | 0.60426 | 0.369705   | -0.501                                  | 0.234553 | 0.634433  | N              | N            | --           | --          | --          | --        | -- | Outlier AIC                                                         |
| Multistage     | m_oe_h_9_md4.dax    | NCMst2-BMR10.opt | 9.33136 | Array                            | 0.9797  | 0.1              | Extra risk | 2.25548 | 0.947395   | -0.635                                  | 1.308085 | 1.380718  | N              | N            | --           | --          | --          | --        | -- | Not selected as Multistage because another has better fit           |
| Multistage     | m_oe_h_9_md4.dax    | NCMst3-BMR10.opt | 8.6149  | Array                            | 0.9996  | 0.1              | Extra risk | 3.66674 | 1.14535    | -0.238                                  | 2.52139  | 2.201414  | N              | N            | --           | --          | --          | --        | -- | Not selected as Multistage because another has better fit           |
| Multistage     | m_oe_h_9_md4.dax    | NCMst4-BMR10.opt | 8.51701 | Array                            | 1       | 0.1              | Extra risk | 4.72787 | 1.18075    | -0.088                                  | 3.54712  | 3.004124  | Y              | N            | --           | --          | --          | --        | -- | Selected as Multistage because has smallest AIC and largest P value |
| Weibull        | m_oe_h_9_md4.dax    | Wei-BMR10.opt    | 10.5017 | Array                            | 1       | 0.1              | Extra risk | 6.89189 | 1.20857    | 0                                       | 5.68332  | 4.702516  | Y              | N            | --           | --          | --          | --        | -- |                                                                     |

| Model Name     | Data File Name      | Option File Name | AIC     | Inputs + Estimates + Scaled Res. | P-value | Specified Effect | Risk Type  | BMD     | BMDL (POD) | Scaled residual for dose group near BMD | Δ BMD    | Δ BMD:POD | Consider Model | POD selected | Selected POD | Average BMD | Average POD | POD Range | N  | Model Note                                                          |
|----------------|---------------------|------------------|---------|----------------------------------|---------|------------------|------------|---------|------------|-----------------------------------------|----------|-----------|----------------|--------------|--------------|-------------|-------------|-----------|----|---------------------------------------------------------------------|
| Quantal-Linear | m_oeH_9_md4.dax     | Quant-BMR10.opt  | 14.8856 | Array                            | 0.4541  | 0.1              | Extra risk | 0.60425 | 0.369704   | -0.501                                  | 0.23455  | 0.634426  | N              | N            | --           | --          | --          | --        | -- | Outlier AIC                                                         |
| Gamma          | m_oeH_9_sev_md4.dax | Gam-BMR10.opt    | 14.3863 | Array                            | 0.999   | 0.1              | Extra risk | 8.32568 | 5.33106    | -0.111                                  | 2.99462  | 0.561731  | Y              | N            | --           | --          | --          | --        | -- |                                                                     |
| Logistic       | m_oeH_9_sev_md4.dax | Log-BMR10.opt    | 16.2173 | Array                            | 1       | 0.1              | Extra risk | 9.60576 | 5.47701    | 0                                       | 4.12875  | 0.753833  | Y              | N            | --           | --          | --          | --        | -- |                                                                     |
| LogLogistic    | m_oeH_9_sev_md4.dax | LogLog-BMR10.opt | 14.2177 | Array                            | 1       | 0.1              | Extra risk | 9.48059 | 6.21293    | 0                                       | 3.26766  | 0.525945  | Y              | Y            | 6.21293      | 8.84077     | 5.04054714  | 3.56279   | 7  |                                                                     |
| Probit         | m_oeH_9_sev_md4.dax | Probit-BMR10.opt | 16.2173 | Array                            | 1       | 0.1              | Extra risk | 9.09481 | 4.89411    | 0                                       | 4.2007   | 0.858317  | Y              | N            | --           | --          | --          | --        | -- |                                                                     |
| LogProbit      | m_oeH_9_sev_md4.dax | LogPro-BMR10.opt | 16.2173 | Array                            | 1       | 0.1              | Extra risk | 9.44871 | 6.15695    | 0                                       | 3.29176  | 0.534641  | Y              | N            | --           | --          | --          | --        | -- |                                                                     |
| Multistage     | m_oeH_9_sev_md4.dax | NCMst1-BMR10.opt | 24.0867 | Array                            | 0.1674  | 0.1              | Extra risk | 1.41452 | 0.890032   | -1.041                                  | 0.524488 | 0.589291  | N              | N            | --           | --          | --          | --        | -- | Outlier AIC                                                         |
| Multistage     | m_oeH_9_sev_md4.dax | NCMst2-BMR10.opt | 17.7981 | Array                            | 0.654   | 0.1              | Extra risk | 4.12365 | 2.19006    | -0.345                                  | 1.93359  | 0.882894  | N              | N            | --           | --          | --          | --        | -- | Not selected as Multistage because another has better fit           |
| Multistage     | m_oeH_9_sev_md4.dax | NCMst3-BMR10.opt | 15.2917 | Array                            | 0.9496  | 0.1              | Extra risk | 6.09156 | 2.81387    | -0.595                                  | 3.27769  | 1.164833  | N              | N            | --           | --          | --          | --        | -- | Not selected as Multistage because another has better fit           |
| Multistage     | m_oeH_9_sev_md4.dax | NCMst4-BMR10.opt | 14.3726 | Array                            | 0.999   | 0.1              | Extra risk | 7.34804 | 2.65014    | -0.174                                  | 4.6979   | 1.772699  | Y              | N            | --           | --          | --          | --        | -- | Selected as Multistage because has smallest AIC and largest P value |
| Weibull        | m_oeH_9_sev_md4.dax | Wei-BMR10.opt    | 16.2173 | Array                            | 1       | 0.1              | Extra risk | 8.5818  | 4.56163    | 0                                       | 4.02017  | 0.881301  | Y              | N            | --           | --          | --          | --        | -- |                                                                     |
| Quantal-Linear | m_oeH_9_sev_md4.dax | Quant-BMR10.opt  | 24.0867 | Array                            | 0.1674  | 0.1              | Extra risk | 1.41452 | 0.890032   | -1.041                                  | 0.524488 | 0.589291  | N              | N            | --           | --          | --          | --        | -- | Outlier AIC                                                         |
| Gamma          | m_reH_9_md4.dax     | Gam-BMR10.opt    | 2.02031 | Array                            | 1       | 0.1              | Extra risk | 1.58754 | 0.850208   | -0.08                                   | 0.737332 | 0.867237  | Y              | N            | --           | --          | --          | --        | -- |                                                                     |
| Logistic       | m_reH_9_md4.dax     | Log-BMR10.opt    | 4       | Array                            | 1       | 0.1              | Extra risk | 2.65507 |            | 0                                       | 2.65507  | #DIV/0!   | N              | N            | --           | --          | --          | --        | -- | Benchmark dose computation failed. Lower limit includes zero.       |
| LogLogistic    | m_reH_9_md4.dax     | LogLog-BMR10.opt | 2.00003 | Array                            | 1       | 0.1              | Extra risk | 1.78083 | 0.868999   | -0.003                                  | 0.911831 | 1.049289  | Y              | N            | --           | --          | --          | --        | -- |                                                                     |
| Probit         | m_reH_9_md4.dax     | Probit-BMR10.opt | 4       | Array                            | 1       | 0.1              | Extra risk | 2.53256 | 0.848426   | 0                                       | 1.684134 | 1.98501   | Y              | N            | --           | --          | --          | --        | -- |                                                                     |
| LogProbit      | m_reH_9_md4.dax     | LogPro-BMR10.opt | 4       | Array                            | 1       | 0.1              | Extra risk | 2.34713 |            | 0                                       | 2.34713  | #DIV/0!   | N              | N            | --           | --          | --          | --        | -- | Benchmark dose computation failed. Lower limit includes zero.       |
| Multistage     | m_reH_9_md4.dax     | NCMst1-BMR10.opt | 14.461  | Array                            | 0.1101  | 0.1              | Extra risk | 0.20961 | 0.133088   | 0                                       | 0.076521 | 0.574965  | N              | N            | --           | --          | --          | --        | -- | Outlier AIC                                                         |
| Multistage     | m_reH_9_md4.dax     | NCMst2-BMR10.opt | 5.54066 | Array                            | 0.7586  | 0.1              | Extra risk | 0.8021  | 0.431569   | -1.208                                  | 0.370534 | 0.858574  | N              | N            | --           | --          | --          | --        | -- | Outlier AIC                                                         |
| Multistage     | m_reH_9_md4.dax     | NCMst3-BMR10.opt | 2.99764 | Array                            | 0.9727  | 0.1              | Extra risk | 1.24667 | 0.60842    | -0.649                                  | 0.63825  | 1.049029  | Y              | N            | --           | --          | --          | --        | -- |                                                                     |
| Multistage     | m_reH_9_md4.dax     | NCMst4-BMR10.opt | 2.26124 | Array                            | 0.9979  | 0.1              | Extra risk | 1.59436 | 0.682118   | -0.337                                  | 0.912242 | 1.337367  | Y              | N            | --           | --          | --          | --        | -- |                                                                     |
| Weibull        | m_reH_9_md4.dax     | Wei-BMR10.opt    | 2       | Array                            | 1       | 0.1              | Extra risk | 3.2522  | 0.82734    | 0                                       | 2.42486  | 2.930911  | Y              | Y            | 0.82734      | 1.9990267   | 0.7809185   | 0.260579  | 6  |                                                                     |
| Quantal-Linear | m_reH_9_md4.dax     | Quant-BMR10.opt  | 14.461  | Array                            | 0.1101  | 0.1              | Extra risk | 0.20961 | 0.133088   | 0                                       | 0.07652  | 0.574958  | N              | N            | --           | --          | --          | --        | -- | Outlier AIC                                                         |
| Gamma          | m_reH_9_sev_md4.dax | Gam-BMR10.opt    | 29.3931 | Array                            | 0.9876  | 0.1              | Extra risk | 5.693   | 3.80194    | -0.38                                   | 1.89106  | 0.497393  | Y              | Y            | 3.80194      | 5.8406729   | 3.80131     | 1.12032   | 7  |                                                                     |
| Logistic       | m_reH_9_sev_md4.dax | Log-BMR10.opt    | 31.57   | Array                            | 0.907   | 0.1              | Extra risk | 6.09992 | 4.20686    | 0.52                                    | 1.89306  | 0.449994  | Y              | N            | --           | --          | --          | --        | -- |                                                                     |
| LogLogistic    | m_reH_9_sev_md4.dax | LogLog-BMR10.opt | 31.3889 | Array                            | 0.94    | 0.1              | Extra risk | 6.02082 | 3.81058    | 0.439                                   | 2.21024  | 0.580027  | Y              | N            | --           | --          | --          | --        | -- |                                                                     |
| Probit         | m_reH_9_sev_md4.dax | Probit-BMR10.opt | 31.379  | Array                            | 0.938   | 0.1              | Extra risk | 6.05205 | 4.06723    | 0.459                                   | 1.98482  | 0.488003  | Y              | N            | --           | --          | --          | --        | -- |                                                                     |
| LogProbit      | m_reH_9_sev_md4.dax | LogPro-BMR10.opt | 31.2369 | Array                            | 0.9628  | 0.1              | Extra risk | 5.95058 | 3.93067    | 0.379                                   | 2.01991  | 0.513884  | Y              | N            | --           | --          | --          | --        | -- |                                                                     |
| Multistage     | m_reH_9_sev_md4.dax | NCMst1-BMR10.opt | 35.0278 | Array                            | 0.4214  | 0.1              | Extra risk | 2.22816 | 1.30659    | -0.664                                  | 0.92157  | 0.705325  | N              | N            | --           | --          | --          | --        | -- | Outlier AIC                                                         |
| Multistage     | m_reH_9_sev_md4.dax | NCMst2-BMR10.opt | 32.427  | Array                            | 0.7217  | 0.1              | Extra risk | 3.72282 | 1.93396    | -1.271                                  | 1.78886  | 0.924973  | N              | N            | --           | --          | --          | --        | -- | Not selected as Multistage because another has better fit           |
| Multistage     | m_reH_9_sev_md4.dax | NCMst3-BMR10.opt | 31.1068 | Array                            | 0.8703  | 0.1              | Extra risk | 4.53793 | 2.62544    | -1.018                                  | 1.91249  | 0.728446  | N              | N            | --           | --          | --          | --        | -- | Not selected as Multistage because another has better fit           |
| Multistage     | m_reH_9_sev_md4.dax | NCMst4-BMR10.opt | 30.3351 | Array                            | 0.937   | 0.1              | Extra risk | 5.05377 | 3.08654    | -0.804                                  | 1.96723  | 0.637358  | Y              | N            | --           | --          | --          | --        | -- | Selected as Multistage because has smallest AIC and largest P value |
| Weibull        | m_reH_9_sev_md4.dax | Wei-BMR10.opt    | 31.5149 | Array                            | 0.9182  | 0.1              | Extra risk | 6.01457 | 3.70535    | 0.507                                   | 2.30922  | 0.623212  | Y              | N            | --           | --          | --          | --        | -- |                                                                     |

| Model Name     | Data File Name       | Option File Name | AIC     | Inputs + Estimates + Scaled Res. | P-value | Specified Effect | Risk Type  | BMD     | BMDL (POD) | Scaled residual for dose group near BMD | Δ BMD    | Δ BMD:POD | Consider Model | POD selected | Selected POD | Average BMD | Average POD | POD Range | N  | Model Note                                                          |                       |
|----------------|----------------------|------------------|---------|----------------------------------|---------|------------------|------------|---------|------------|-----------------------------------------|----------|-----------|----------------|--------------|--------------|-------------|-------------|-----------|----|---------------------------------------------------------------------|-----------------------|
| Quantal-Linear | m_reh_9_sev_md4.dax  | Quant-BMR10.opt  | 35.0278 | Array                            | 0.4214  | 0.1              | Extra risk | 2.22816 | 1.30659    | -0.664                                  | 0.92157  | 0.705325  | N              | N            | --           | --          | --          | --        | -- | Outlier AIC                                                         |                       |
| Gamma          | m_resm_9_md4.dax     | Gam-BMR10.opt    | 24.2219 | Array                            | 0.8597  | 0.1              | Extra risk | 4.52949 | 3.73717    | -0.978                                  | 0.79232  | 0.212011  | Y              | Y            | 3.73717      | 5.11611     | 3.81894571  | 1.51488   | 7  |                                                                     |                       |
| Logistic       | m_resm_9_md4.dax     | Log-BMR10.opt    | 24.8318 | Array                            | 0.8654  | 0.1              | Extra risk | 5.59068 | 4.02387    | -0.32                                   | 1.56681  | 0.389379  | Y              | N            | --           | --          | --          | --        | -- |                                                                     |                       |
| LogLogistic    | m_resm_9_md4.dax     | LogLog-BMR10.opt | 24.5845 | Array                            | 0.9165  | 0.1              | Extra risk | 5.52695 | 4.13921    | -0.261                                  | 1.38774  | 0.335267  | Y              | N            | --           | --          | --          | --        | -- |                                                                     |                       |
| Probit         | m_resm_9_md4.dax     | Probit-BMR10.opt | 24.729  | Array                            | 0.8825  | 0.1              | Extra risk | 5.49706 | 4.06654    | -0.25                                   | 1.43052  | 0.351778  | Y              | N            | --           | --          | --          | --        | -- |                                                                     |                       |
| LogProbit      | m_resm_9_md4.dax     | LogPro-BMR10.opt | 24.4946 | Array                            | 0.9309  | 0.1              | Extra risk | 5.41249 | 4.19841    | -0.196                                  | 1.21408  | 0.289176  | Y              | N            | --           | --          | --          | --        | -- |                                                                     |                       |
| Multistage     | m_resm_9_md4.dax     | NCMst1-BMR10.opt | 39.0358 | Array                            | 0.0174  | 0.1              | Extra risk | 0.87587 | 0.58688    | -1.077                                  | 0.288987 | 0.492412  | N              | N            | --           | --          | --          | --        | -- | P-value too low                                                     |                       |
| Multistage     | m_resm_9_md4.dax     | NCMst2-BMR10.opt | 32.188  | Array                            | 0.1503  | 0.1              | Extra risk | 2.25608 | 1.43287    | -0.417                                  | 0.82321  | 0.574518  | N              | N            | --           | --          | --          | --        | -- | Not selected as Multistage because another has better fit           |                       |
| Multistage     | m_resm_9_md4.dax     | NCMst3-BMR10.opt | 28.478  | Array                            | 0.4058  | 0.1              | Extra risk | 3.19915 | 2.15545    | -1.803                                  | 1.0437   | 0.484214  | N              | N            | --           | --          | --          | --        | -- | Not selected as Multistage because another has better fit           |                       |
| Multistage     | m_resm_9_md4.dax     | NCMst4-BMR10.opt | 26.1855 | Array                            | 0.6511  | 0.1              | Extra risk | 3.85471 | 2.68353    | -1.427                                  | 1.17118  | 0.436433  | Y              | N            | --           | --          | --          | --        | -- | Selected as Multistage because has smallest AIC and largest P value |                       |
| Weibull        | m_resm_9_md4.dax     | Wei-BMR10.opt    | 25.232  | Array                            | 0.7931  | 0.1              | Extra risk | 5.40139 | 3.88389    | -0.435                                  | 1.5175   | 0.390717  | Y              | N            | --           | --          | --          | --        | -- |                                                                     |                       |
| Quantal-Linear | m_resm_9_md4.dax     | Quant-BMR10.opt  | 39.0358 | Array                            | 0.0174  | 0.1              | Extra risk | 0.87587 | 0.58688    | -1.077                                  | 0.288987 | 0.492412  | N              | N            | --           | --          | --          | --        | -- | P-value too low                                                     |                       |
| Gamma          | m_resm_9_sev_md4.dax | Gam-BMR10.opt    | NA      | NA                               | NA      | NA               | NA         | NA      | NA         | NA                                      | NA       | NA        | NA             | NA           | NA           | NA          | NA          | NA        | NA | NA                                                                  | Could not run in BMDS |
| Logistic       | m_resm_9_sev_md4.dax | Log-BMR10.opt    | NA      | NA                               | NA      | NA               | NA         | NA      | NA         | NA                                      | NA       | NA        | NA             | NA           | NA           | NA          | NA          | NA        | NA | NA                                                                  | Could not run in BMDS |
| LogLogistic    | m_resm_9_sev_md4.dax | LogLog-BMR10.opt | NA      | NA                               | NA      | NA               | NA         | NA      | NA         | NA                                      | NA       | NA        | NA             | NA           | NA           | NA          | NA          | NA        | NA | NA                                                                  | Could not run in BMDS |
| Probit         | m_resm_9_sev_md4.dax | Probit-BMR10.opt | NA      | NA                               | NA      | NA               | NA         | NA      | NA         | NA                                      | NA       | NA        | NA             | NA           | NA           | NA          | NA          | NA        | NA | NA                                                                  | Could not run in BMDS |
| LogProbit      | m_resm_9_sev_md4.dax | LogPro-BMR10.opt | NA      | NA                               | NA      | NA               | NA         | NA      | NA         | NA                                      | NA       | NA        | NA             | NA           | NA           | NA          | NA          | NA        | NA | NA                                                                  | Could not run in BMDS |
| Multistage     | m_resm_9_sev_md4.dax | NCMst1-BMR10.opt | NA      | NA                               | NA      | NA               | NA         | NA      | NA         | NA                                      | NA       | NA        | NA             | NA           | NA           | NA          | NA          | NA        | NA | NA                                                                  | Could not run in BMDS |
| Multistage     | m_resm_9_sev_md4.dax | NCMst2-BMR10.opt | NA      | NA                               | NA      | NA               | NA         | NA      | NA         | NA                                      | NA       | NA        | NA             | NA           | NA           | NA          | NA          | NA        | NA | NA                                                                  | Could not run in BMDS |
| Multistage     | m_resm_9_sev_md4.dax | NCMst3-BMR10.opt | NA      | NA                               | NA      | NA               | NA         | NA      | NA         | NA                                      | NA       | NA        | NA             | NA           | NA           | NA          | NA          | NA        | NA | NA                                                                  | Could not run in BMDS |
| Multistage     | m_resm_9_sev_md4.dax | NCMst4-BMR10.opt | NA      | NA                               | NA      | NA               | NA         | NA      | NA         | NA                                      | NA       | NA        | NA             | NA           | NA           | NA          | NA          | NA        | NA | NA                                                                  | Could not run in BMDS |
| Weibull        | m_resm_9_sev_md4.dax | Wei-BMR10.opt    | NA      | NA                               | NA      | NA               | NA         | NA      | NA         | NA                                      | NA       | NA        | NA             | NA           | NA           | NA          | NA          | NA        | NA | NA                                                                  | Could not run in BMDS |
| Quantal-Linear | m_resm_9_sev_md4.dax | Quant-BMR10.opt  | NA      | NA                               | NA      | NA               | NA         | NA      | NA         | NA                                      | NA       | NA        | NA             | NA           | NA           | NA          | NA          | NA        | NA | NA                                                                  | Could not run in BMDS |

|                             |
|-----------------------------|
| Model excluded from average |
| Reason for model exclusion  |
| Selected model (best fit)   |

**A: Gamma\_m\_oed\_9\_md4\_Gam-BMR10**

Gamma Multi-Hit Model, with BMR of 10% Extra Risk for the BMD and 0.95 Lower Confidence Limit for the BMD

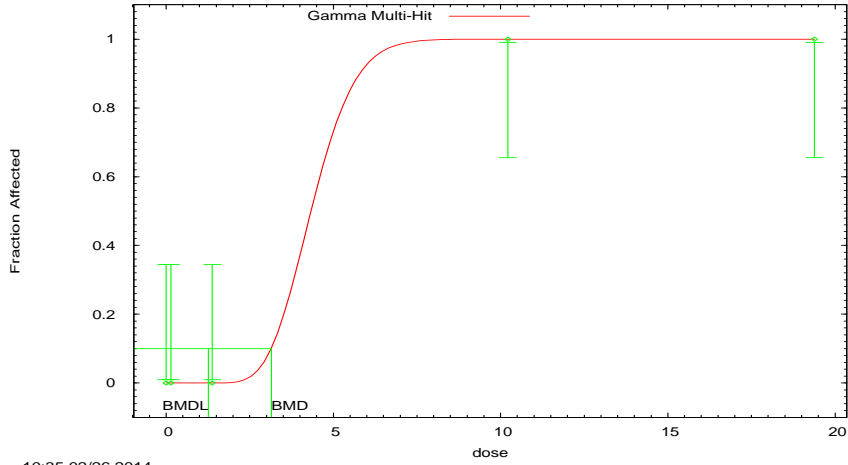

10:35 02/26 2014

**B: Logistic\_m\_oed\_9\_md4\_Log-BMR10**

Logistic Model, with BMR of 10% Extra Risk for the BMD and 0.95 Lower Confidence Limit for the BMDL

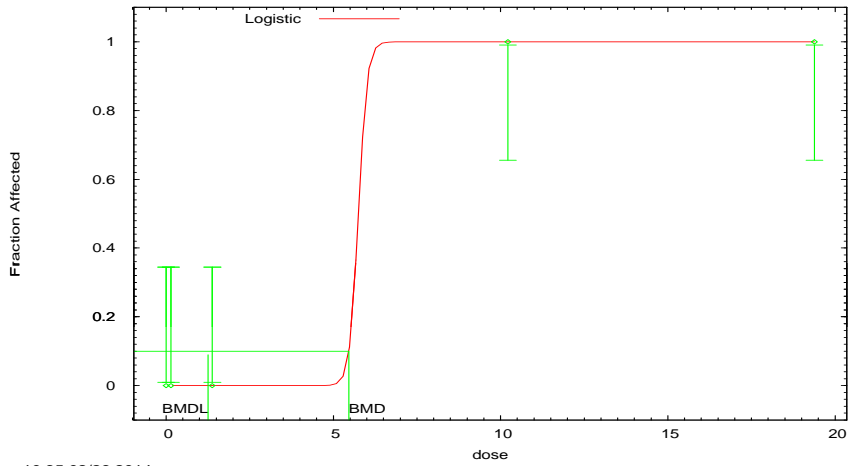

10:35 02/26 2014

**C: LogLogistic\_m\_oed\_9\_md4\_LogLog-BMR10**

Log-Logistic Model, with BMR of 10% Extra Risk for the BMD and 0.95 Lower Confidence Limit for the BMDL

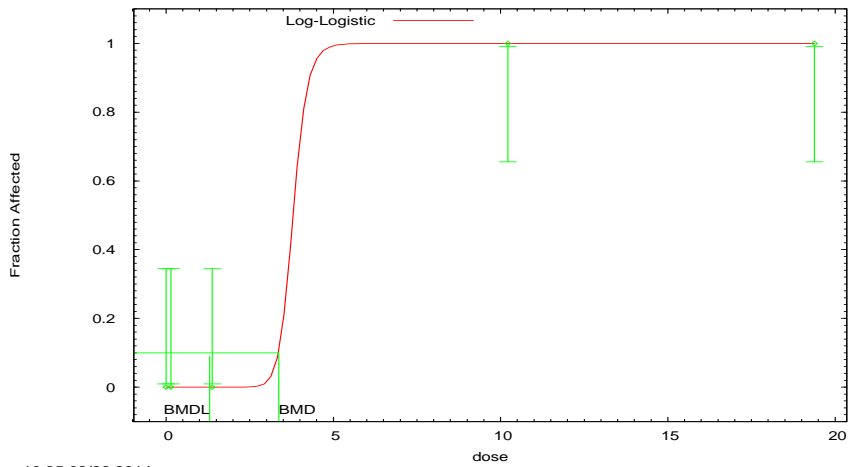

10:35 02/26 2014

**D: Probit\_m\_oed\_9\_md4\_Probit-BMR10**

Probit Model, with BMR of 10% Extra Risk for the BMD and 0.95 Lower Confidence Limit for the BMDL

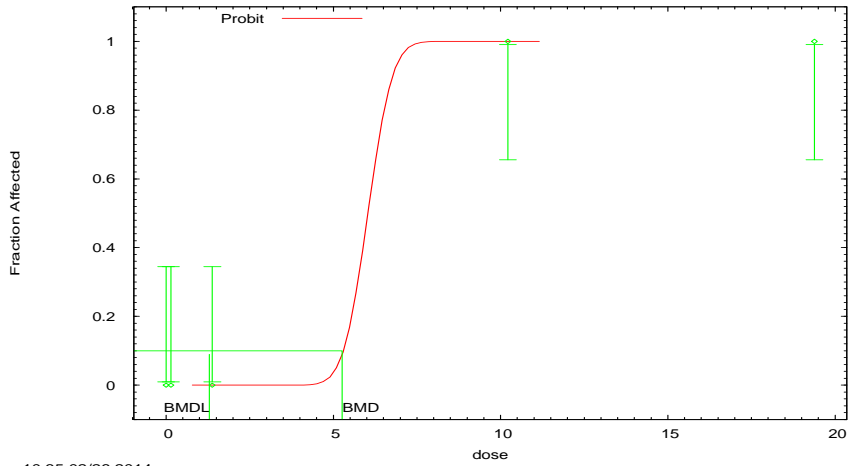

**E: LogProbit\_m\_oed\_9\_md4\_LogPro-BMR10**

LogProbit Model, with BMR of 10% Extra Risk for the BMD and 0.95 Lower Confidence Limit for the BMDL

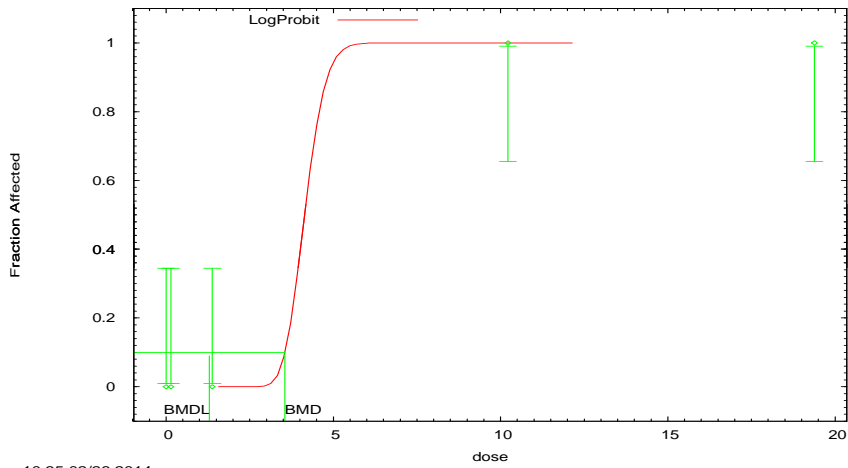

**F: Multistage\_m\_oed\_9\_md4\_NCMst1-BMR10**

Multistage Model, with BMR of 10% Extra Risk for the BMD and 0.95 Lower Confidence Limit for the BMDL

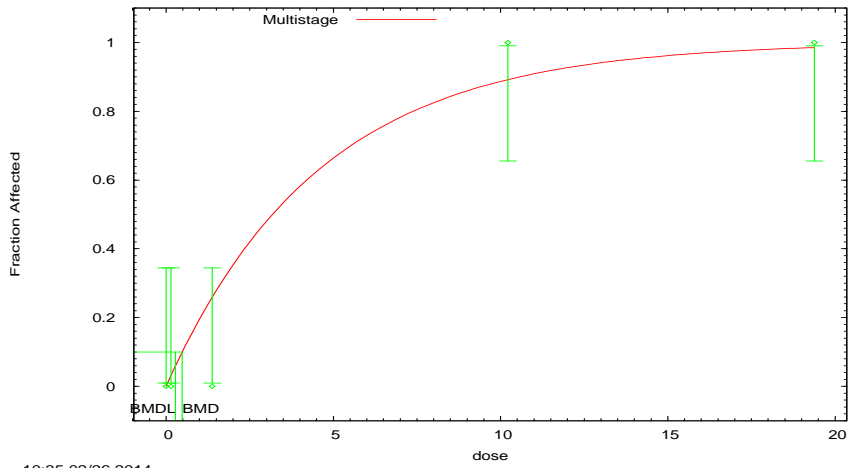

**G: Multistage\_m\_oed\_9\_md4\_NCMst2-BMR10**

Multistage Model, with BMR of 10% Extra Risk for the BMD and 0.95 Lower Confidence Limit for the BMDL

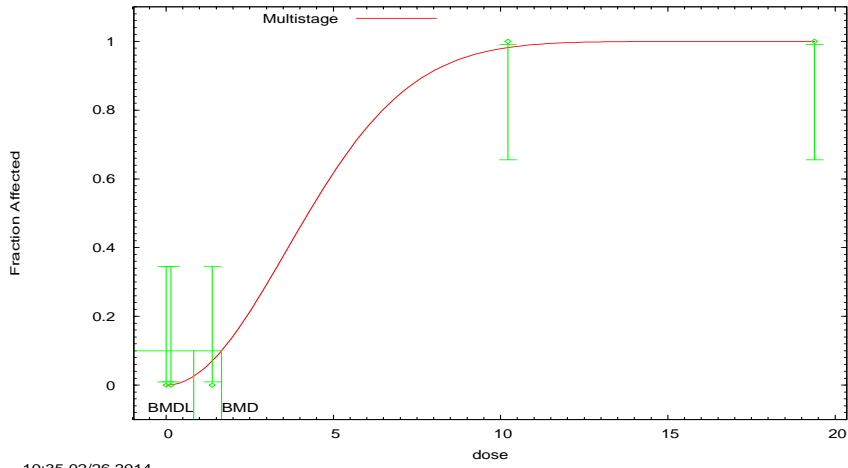

10:35 02/26 2014

**H: Multistage\_m\_oed\_9\_md4\_NCMst3-BMR10**

Multistage Model, with BMR of 10% Extra Risk for the BMD and 0.95 Lower Confidence Limit for the BMDL

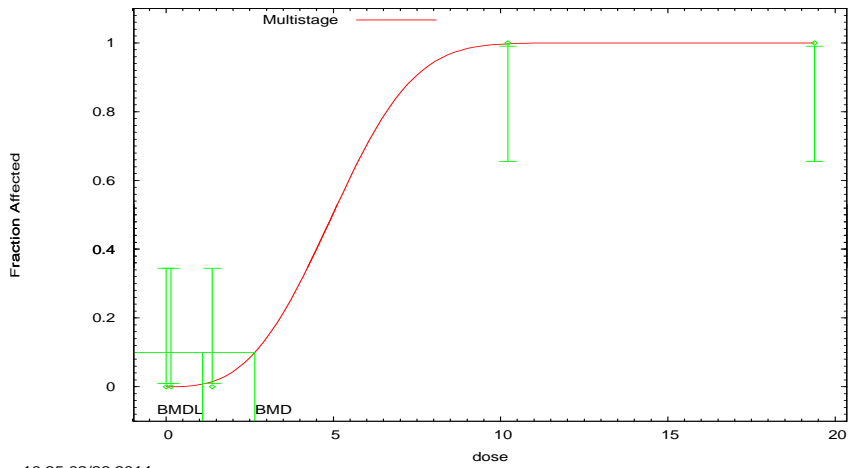

10:35 02/26 2014

**I: Multistage\_m\_oed\_9\_md4\_NCMst4-BMR10**

Multistage Model, with BMR of 10% Extra Risk for the BMD and 0.95 Lower Confidence Limit for the BMDL

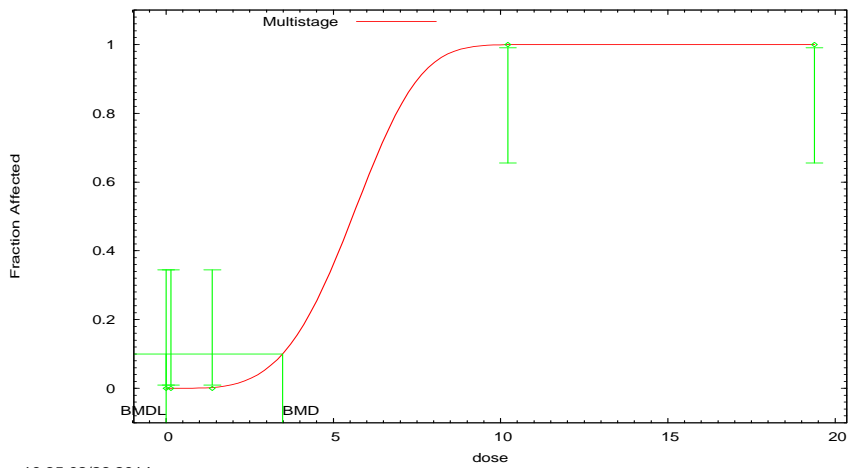

10:35 02/26 2014

**J: Weibull\_m\_oed\_9\_md4\_Wei-BMR10**

Weibull Model, with BMR of 10% Extra Risk for the BMD and 0.95 Lower Confidence Limit for the BMDL

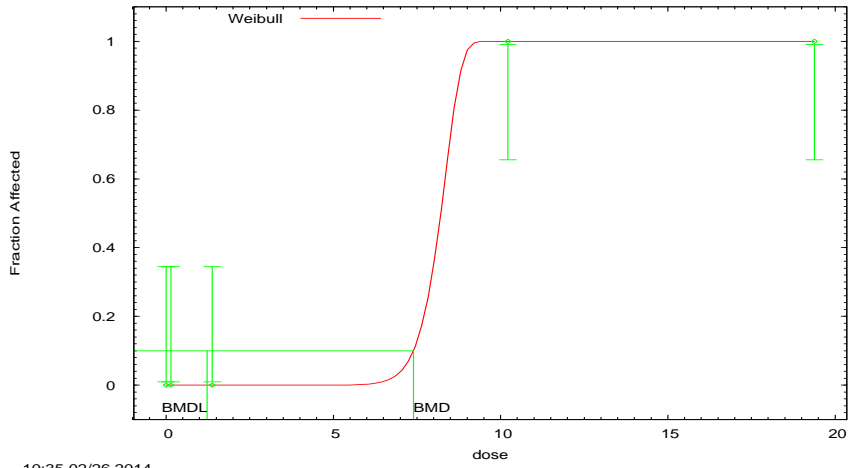

10:35 02/26 2014

**K: Quantal-Linear\_m\_oed\_9\_md4\_Quant-BMR10**

Quantal Linear Model, with BMR of 10% Extra Risk for the BMD and 0.95 Lower Confidence Limit for the BMD

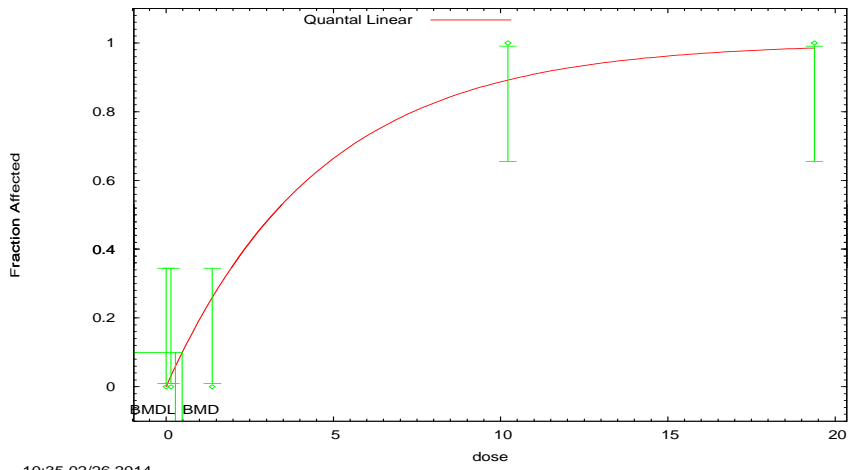

10:35 02/26 2014



### A: Gamma\_m\_oeH\_9\_md4\_Gam-BMR10

Gamma Multi-Hit Model, with BMR of 10% Extra Risk for the BMD and 0.95 Lower Confidence Limit for the BMD

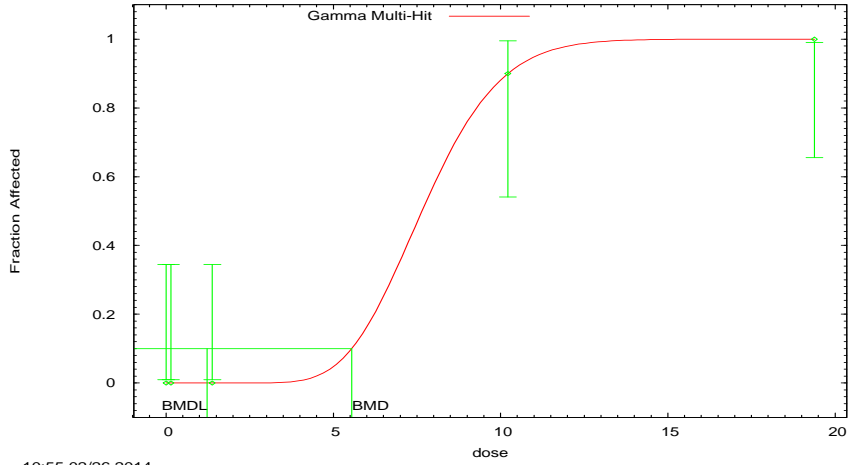

10:55 02/26 2014

### B: Logistic\_m\_oeH\_9\_md4\_Log-BMR10

Logistic Model, with BMR of 10% Extra Risk for the BMD and 0.95 Lower Confidence Limit for the BMDL

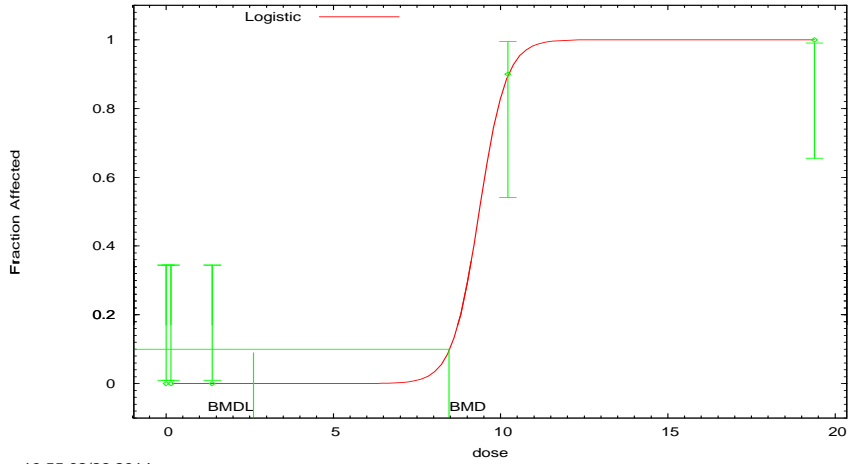

10:55 02/26 2014

### C: LogLogistic\_m\_oeH\_9\_md4\_LogLog-BMR10

Log-Logistic Model, with BMR of 10% Extra Risk for the BMD and 0.95 Lower Confidence Limit for the BMDL

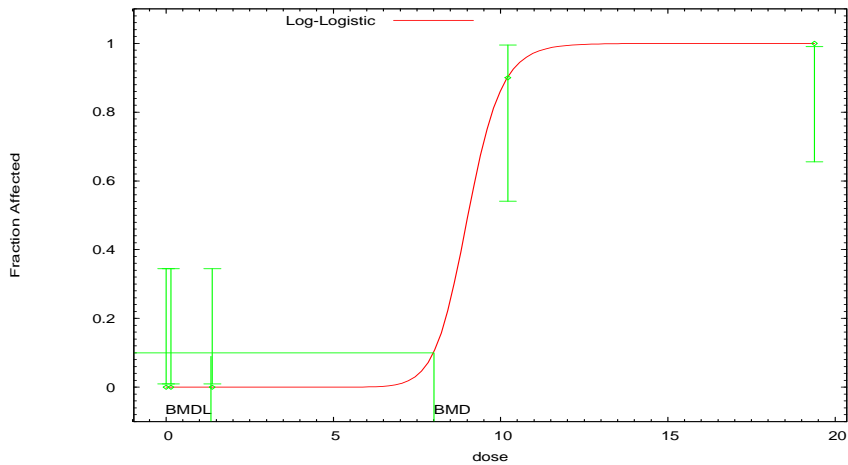

10:55 02/26 2014

**D: Probit\_m\_oeH\_9\_md4\_Probit-BMR10**

Probit Model, with BMR of 10% Extra Risk for the BMD and 0.95 Lower Confidence Limit for the BMDL

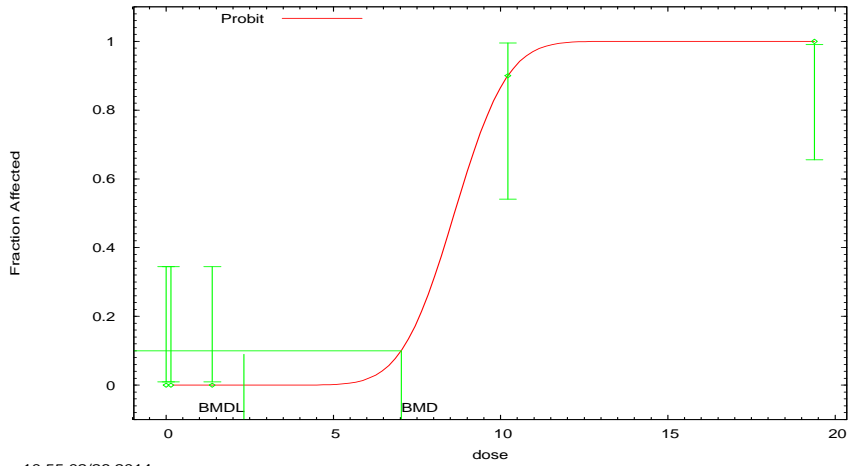

**E: LogProbit\_m\_oeH\_9\_md4\_LogPro-BMR10**

LogProbit Model, with BMR of 10% Extra Risk for the BMD and 0.95 Lower Confidence Limit for the BMDL

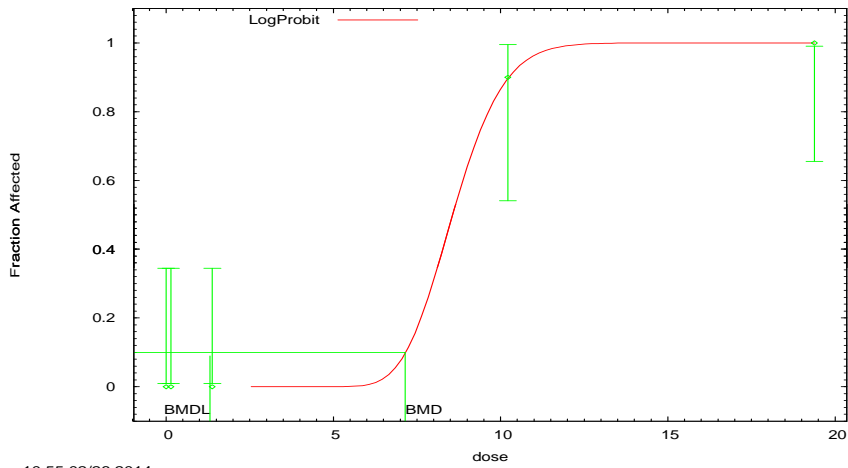

**F: Multistage\_m\_oeH\_9\_md4\_NCMst1-BMR10**

Multistage Model, with BMR of 10% Extra Risk for the BMD and 0.95 Lower Confidence Limit for the BMDL

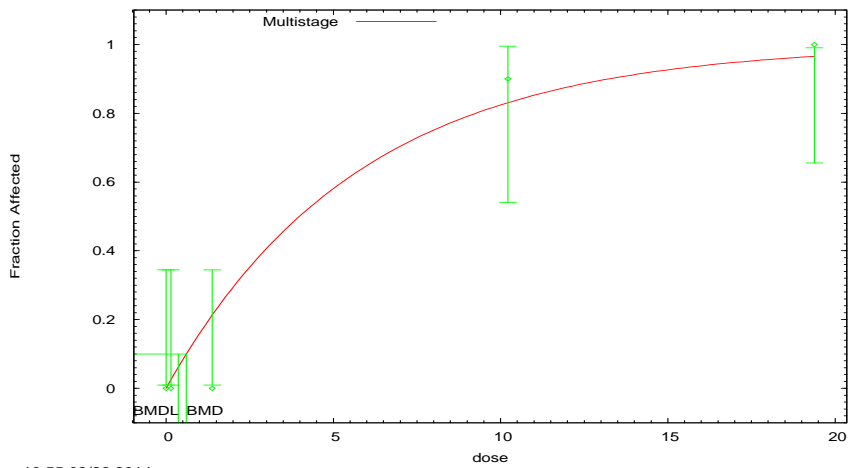

**G: Multistage\_m\_oeH\_9\_md4\_NCMst2-BMR10**

Multistage Model, with BMR of 10% Extra Risk for the BMD and 0.95 Lower Confidence Limit for the BMDL

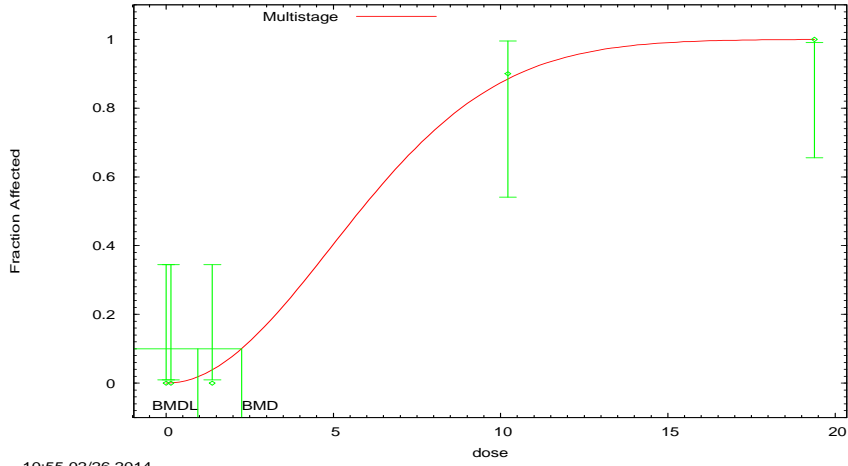

**H: Multistage\_m\_oeH\_9\_md4\_NCMst3-BMR10**

Multistage Model, with BMR of 10% Extra Risk for the BMD and 0.95 Lower Confidence Limit for the BMDL

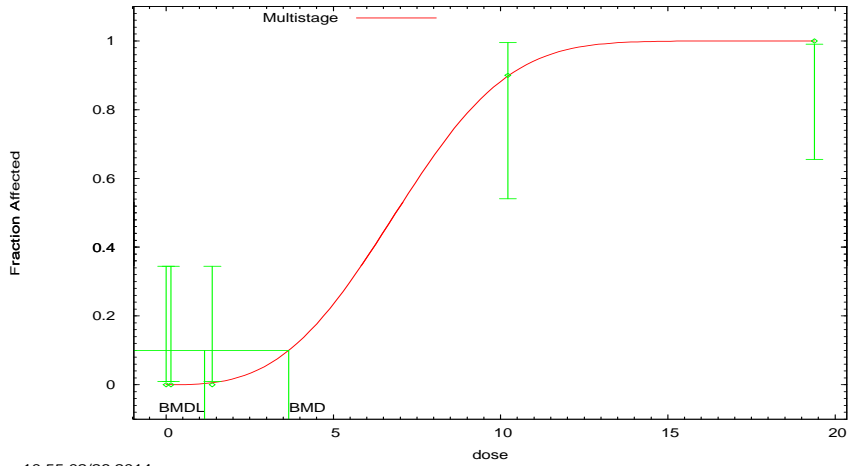

**I: Multistage\_m\_oeH\_9\_md4\_NCMst4-BMR10**

Multistage Model, with BMR of 10% Extra Risk for the BMD and 0.95 Lower Confidence Limit for the BMDL

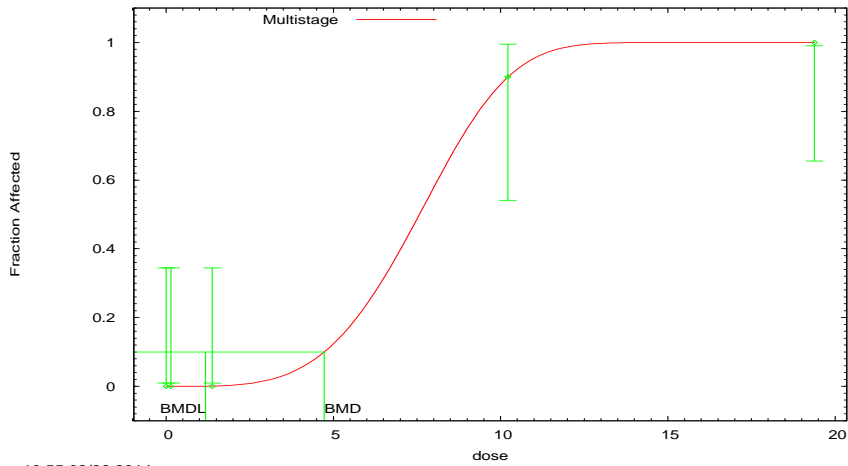

**J: Weibull\_m\_oe\_h\_9\_md4\_Wei-BMR10**

Weibull Model, with BMR of 10% Extra Risk for the BMD and 0.95 Lower Confidence Limit for the BMDL

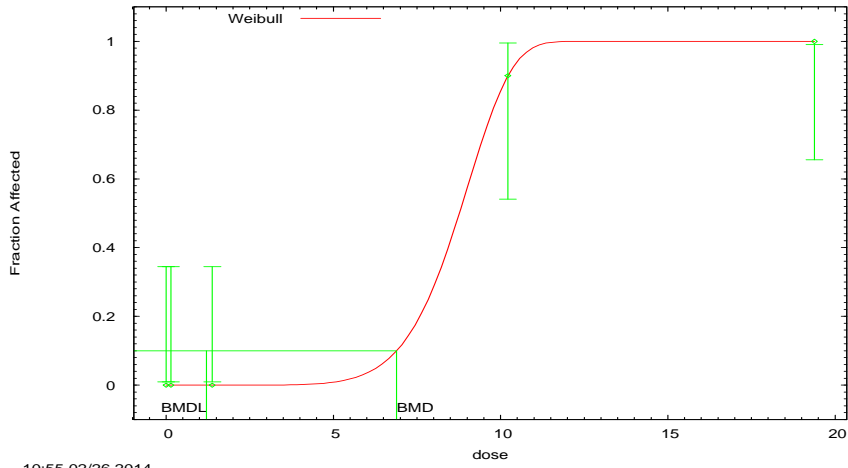

10:55 02/26 2014

**K: Quantal-Linear\_m\_oe\_h\_9\_md4\_Quant-BMR10**

Quantal Linear Model, with BMR of 10% Extra Risk for the BMD and 0.95 Lower Confidence Limit for the BMDL

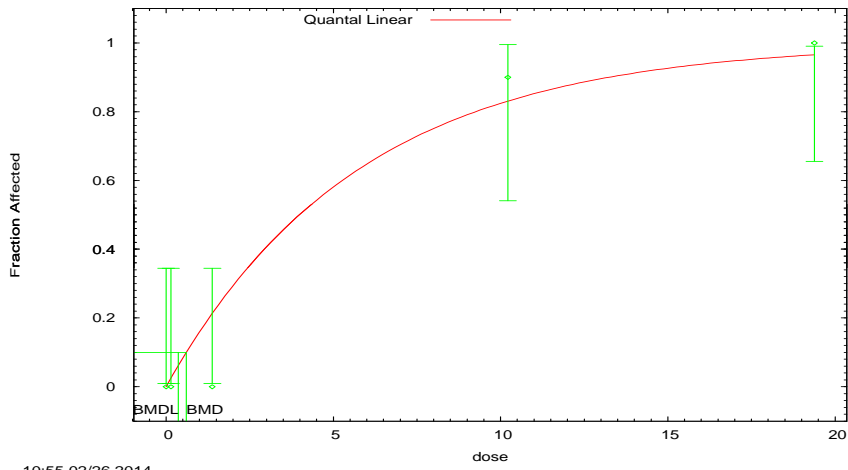

10:55 02/26 2014

**A: Gamma\_m\_reh\_9\_md4\_Gam-BMR10**

Gamma Multi-Hit Model, with BMR of 10% Extra Risk for the BMD and 0.95 Lower Confidence Limit for the BMD

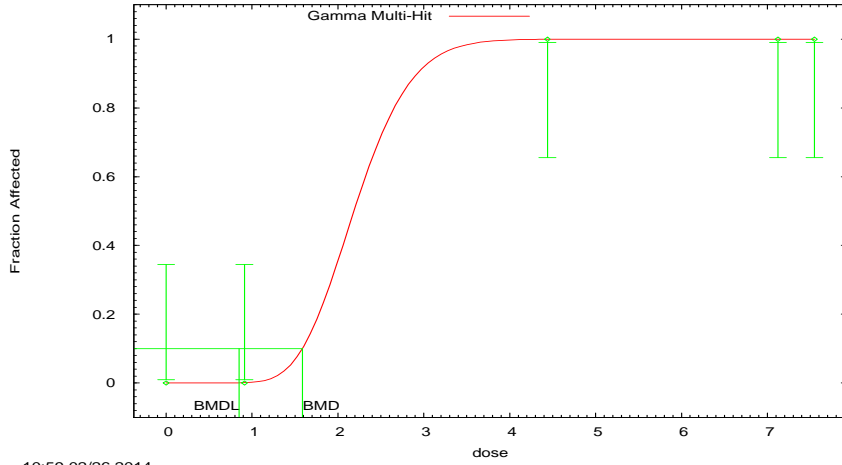

10:59 02/26 2014

**B: Logistic\_m\_reh\_9\_md4\_Log-BMR10**

Logistic Model

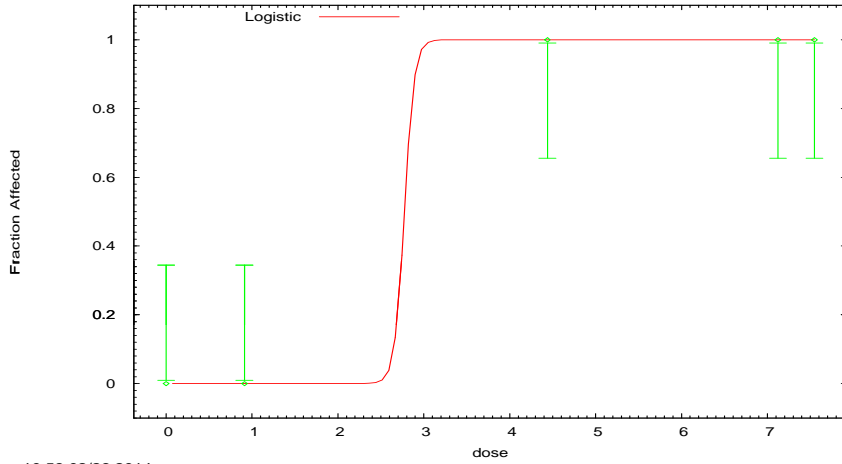

10:59 02/26 2014

**C: LogLogistic\_m\_reh\_9\_md4\_LogLog-BMR10**

Log-Logistic Model, with BMR of 10% Extra Risk for the BMD and 0.95 Lower Confidence Limit for the BMDL

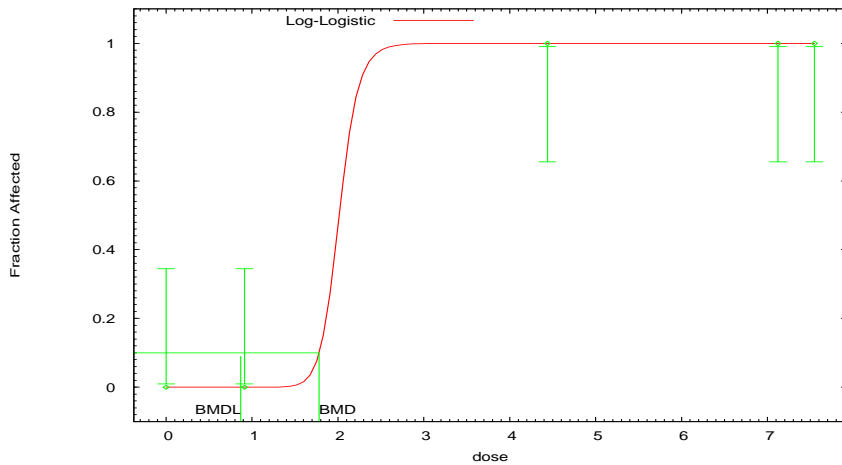

10:59 02/26 2014

**D: Probit\_m\_reh\_9\_md4\_Probit-BMR10**

Probit Model, with BMR of 10% Extra Risk for the BMD and 0.95 Lower Confidence Limit for the BMDL

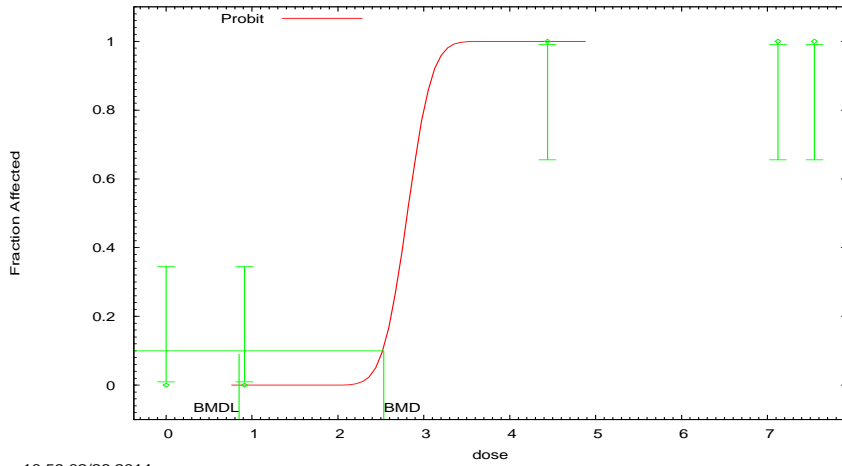

10:59 02/26 2014

**E: LogProbit\_m\_reh\_9\_md4\_LogPro-BMR10**

LogProbit Model

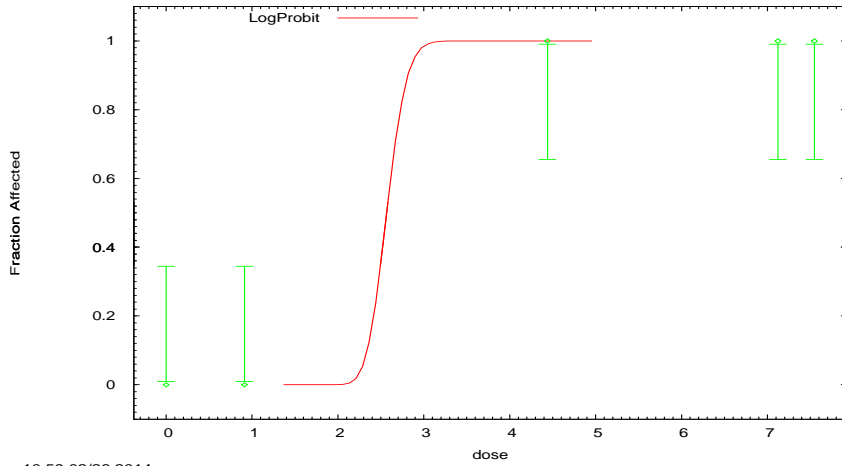

10:59 02/26 2014

**F: Multistage\_m\_reh\_9\_md4\_NCMst1-BMR10**

Multistage Model, with BMR of 10% Extra Risk for the BMD and 0.95 Lower Confidence Limit for the BMDL

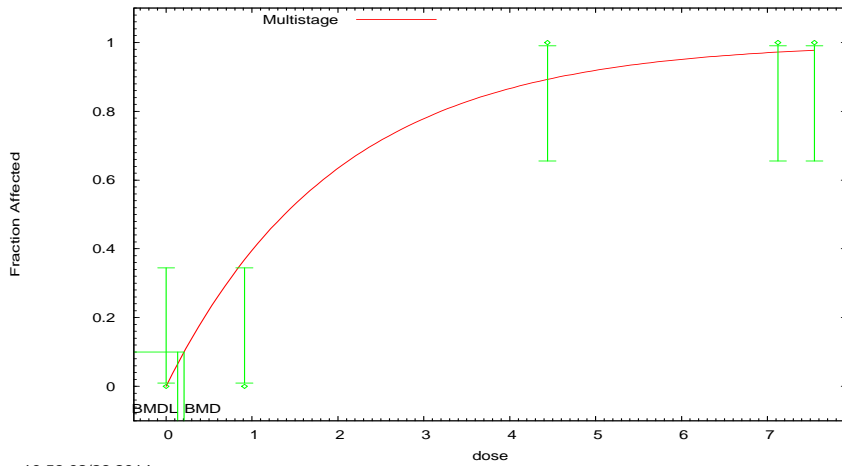

10:59 02/26 2014

**G: Multistage\_m\_reh\_9\_md4\_NCMst2-BMR10**

Multistage Model, with BMR of 10% Extra Risk for the BMD and 0.95 Lower Confidence Limit for the BMDL

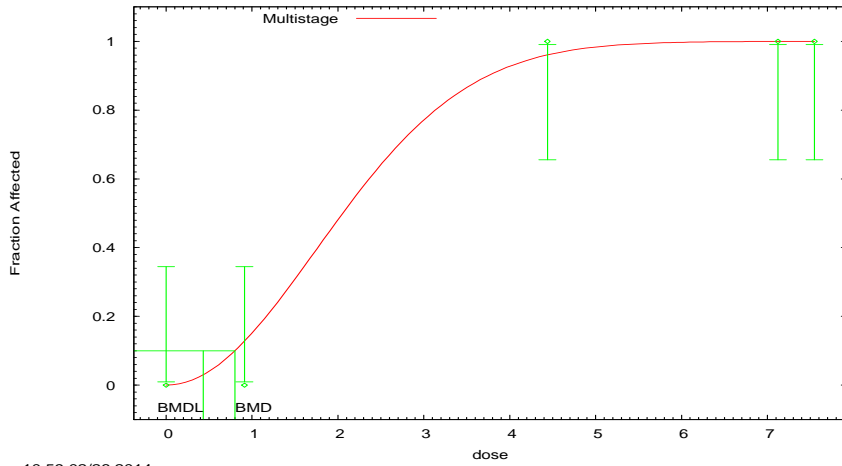

**H: Multistage\_m\_reh\_9\_md4\_NCMst3-BMR10**

Multistage Model, with BMR of 10% Extra Risk for the BMD and 0.95 Lower Confidence Limit for the BMDL

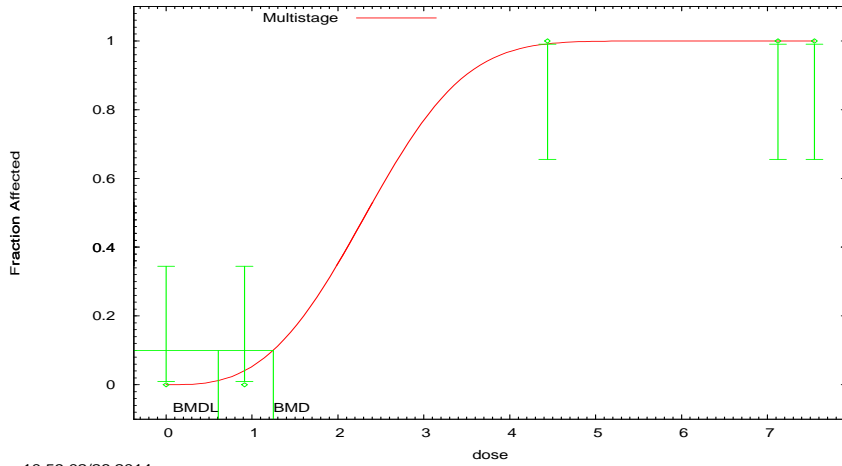

**I: Multistage\_m\_reh\_9\_md4\_NCMst4-BMR10**

Multistage Model, with BMR of 10% Extra Risk for the BMD and 0.95 Lower Confidence Limit for the BMDL

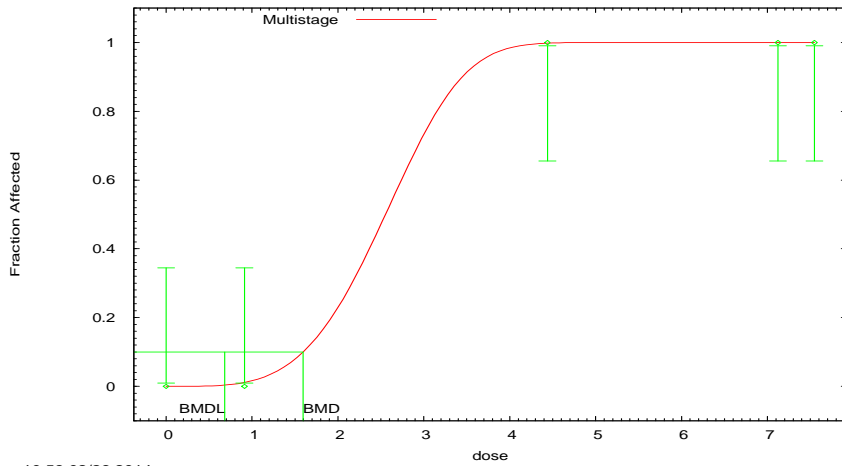

**J: Weibull\_m\_reh\_9\_md4\_Wei-BMR10**

Weibull Model, with BMR of 10% Extra Risk for the BMD and 0.95 Lower Confidence Limit for the BMDL

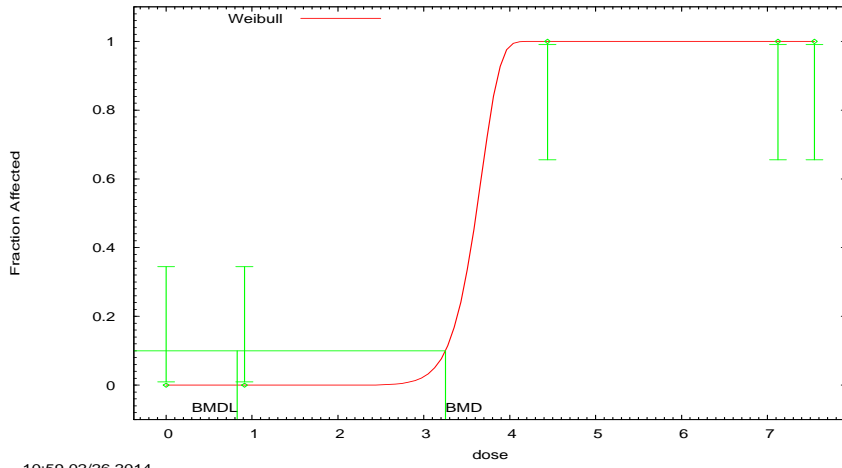

10:59 02/26 2014

**K: Quantal-Linear\_m\_reh\_9\_md4\_Quant-BMR10**

Quantal Linear Model, with BMR of 10% Extra Risk for the BMD and 0.95 Lower Confidence Limit for the BMD

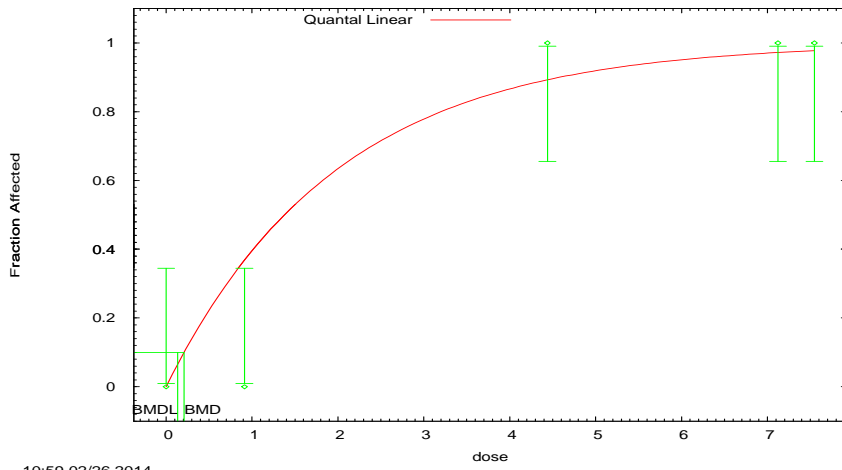

10:59 02/26 2014



**A: Gamma\_m\_resm\_9\_md4\_Gam-BMR10**

Gamma Multi-Hit Model, with BMR of 10% Extra Risk for the BMD and 0.95 Lower Confidence Limit for the BMD

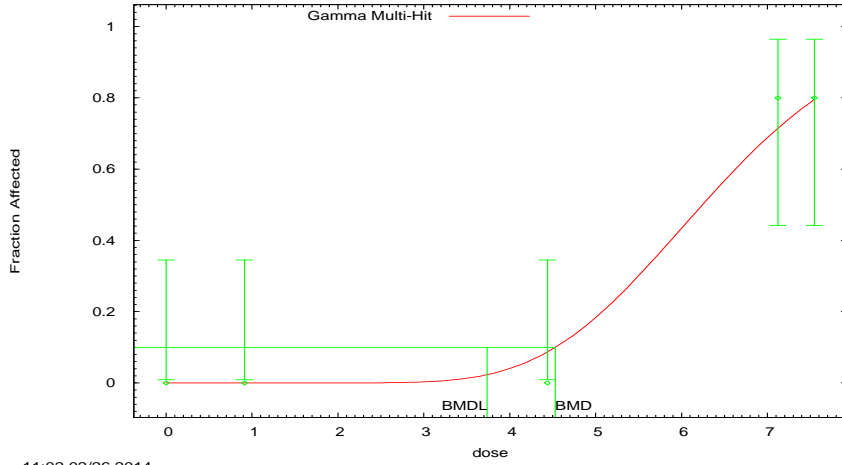

11:02 02/26 2014

**B: Logistic\_m\_resm\_9\_md4\_Log-BMR10**

Logistic Model, with BMR of 10% Extra Risk for the BMD and 0.95 Lower Confidence Limit for the BMDL

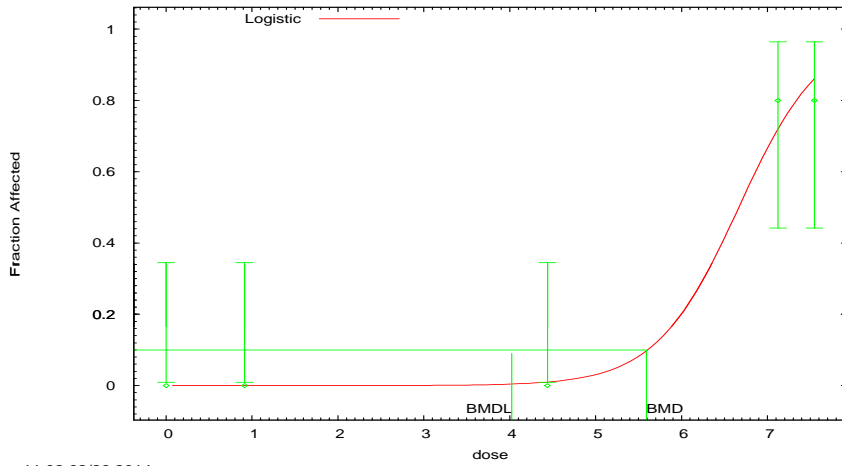

11:02 02/26 2014

**C: LogLogistic\_m\_resm\_9\_md4\_LogLog-BMR10**

Log-Logistic Model, with BMR of 10% Extra Risk for the BMD and 0.95 Lower Confidence Limit for the BMDL

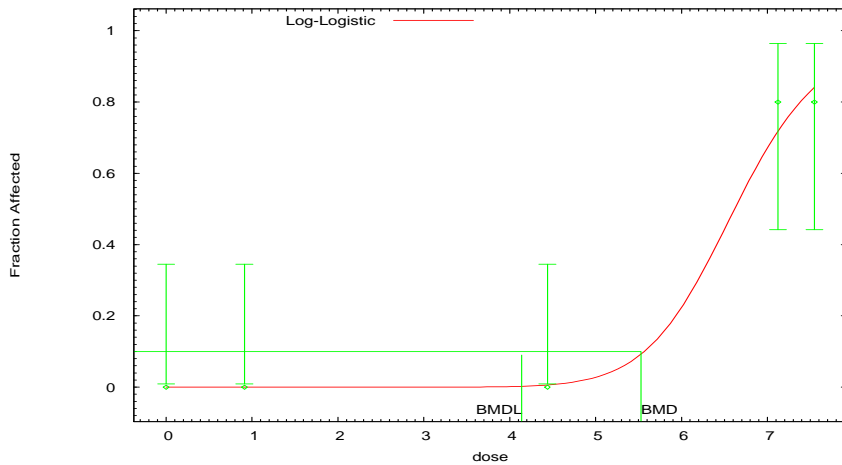

11:02 02/26 2014

**D: Probit\_m\_resm\_9\_md4\_Probit-BMR10**

Probit Model, with BMR of 10% Extra Risk for the BMD and 0.95 Lower Confidence Limit for the BMDL

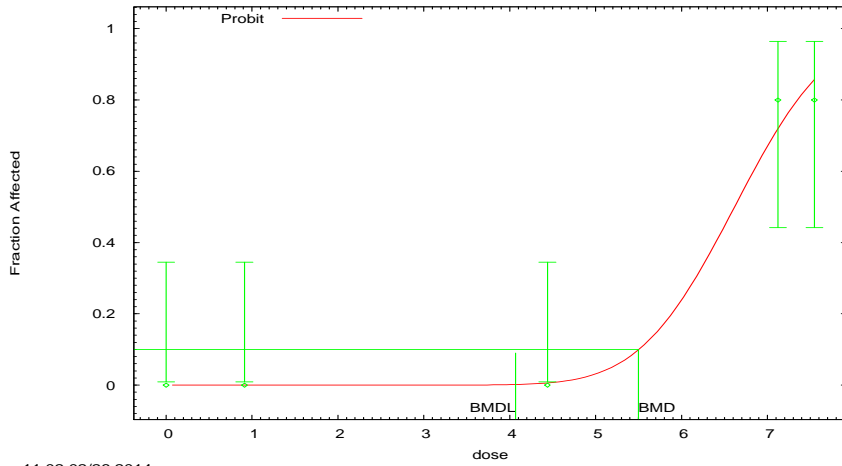

11:02 02/26 2014

**E: LogProbit\_m\_resm\_9\_md4\_LogPro-BMR10**

LogProbit Model, with BMR of 10% Extra Risk for the BMD and 0.95 Lower Confidence Limit for the BMDL

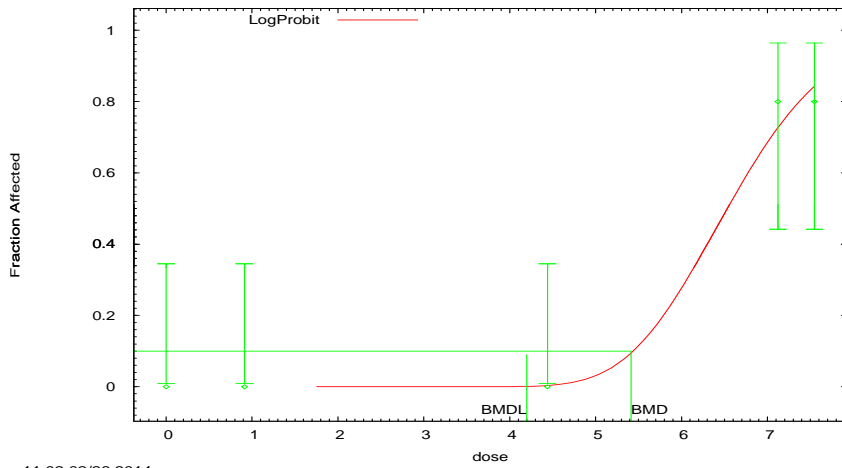

11:02 02/26 2014

**F: Multistage\_m\_resm\_9\_md4\_NCMst1-BMR10**

Multistage Model, with BMR of 10% Extra Risk for the BMD and 0.95 Lower Confidence Limit for the BMDL

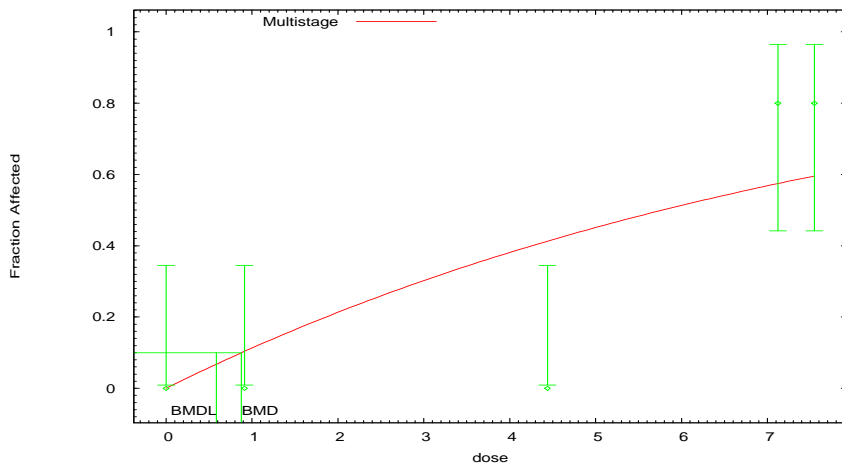

11:02 02/26 2014

**G: Multistage\_m\_resm\_9\_md4\_NCMst2-BMR10**

Multistage Model, with BMR of 10% Extra Risk for the BMD and 0.95 Lower Confidence Limit for the BMDL

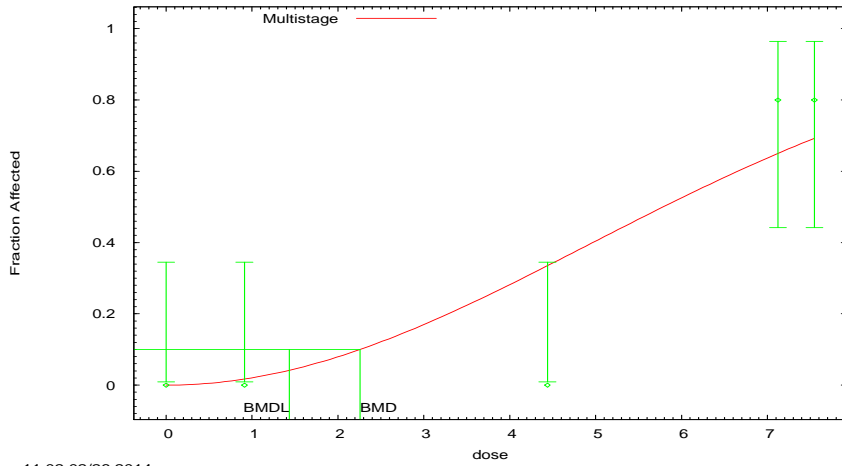

11:02 02/26 2014

**H: Multistage\_m\_resm\_9\_md4\_NCMst3-BMR10**

Multistage Model, with BMR of 10% Extra Risk for the BMD and 0.95 Lower Confidence Limit for the BMDL

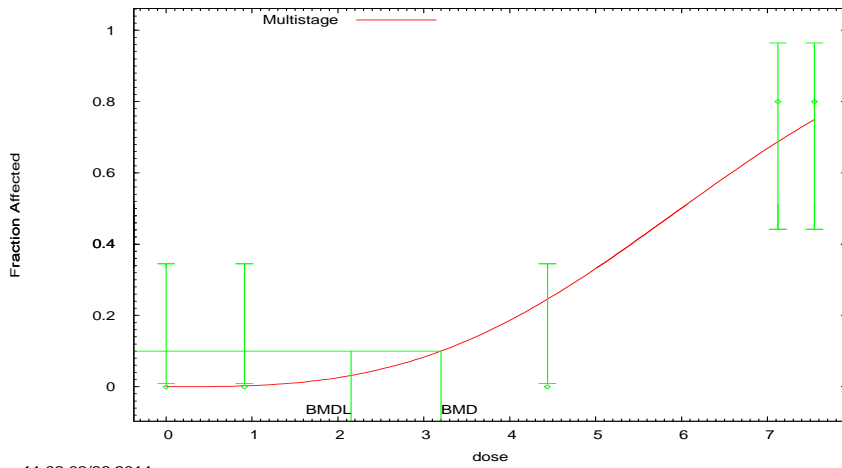

11:02 02/26 2014

**I: Multistage\_m\_resm\_9\_md4\_NCMst4-BMR10**

Multistage Model, with BMR of 10% Extra Risk for the BMD and 0.95 Lower Confidence Limit for the BMDL

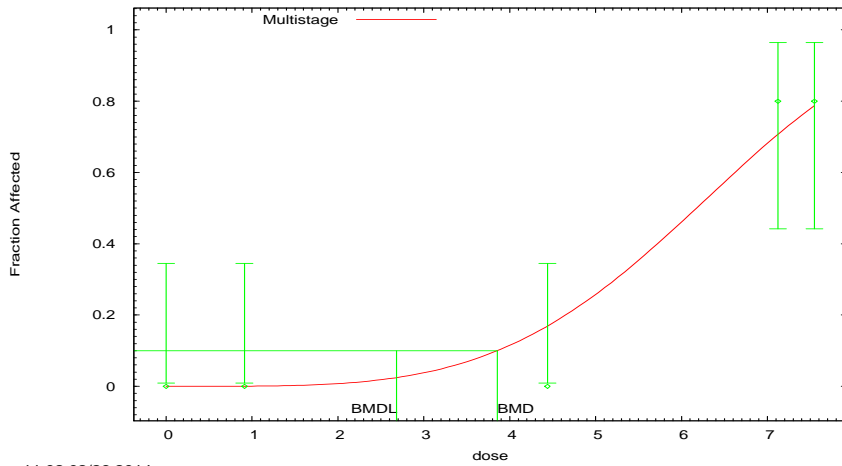

11:02 02/26 2014

**J: Weibull\_m\_resm\_9\_md4\_Wei-BMR10**

Weibull Model, with BMR of 10% Extra Risk for the BMD and 0.95 Lower Confidence Limit for the BMDL

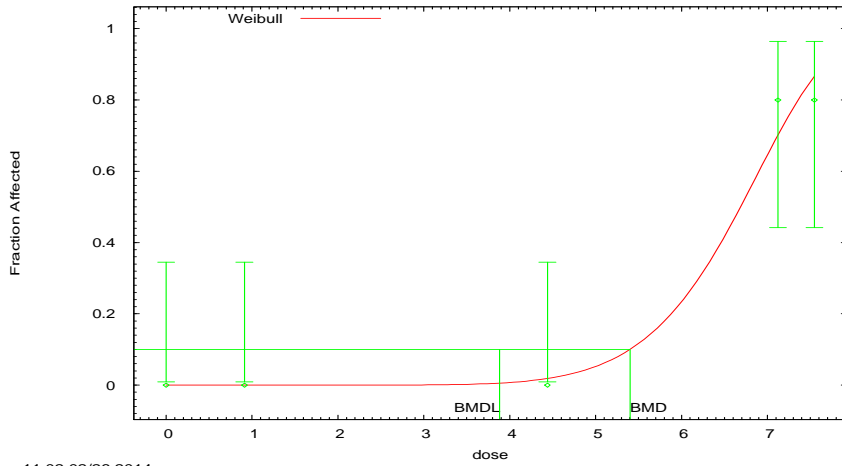

11:02 02/26 2014

**K: Quantal-Linear\_m\_resm\_9\_md4\_Quant-BMR10**

Quantal Linear Model, with BMR of 10% Extra Risk for the BMD and 0.95 Lower Confidence Limit for the BMD

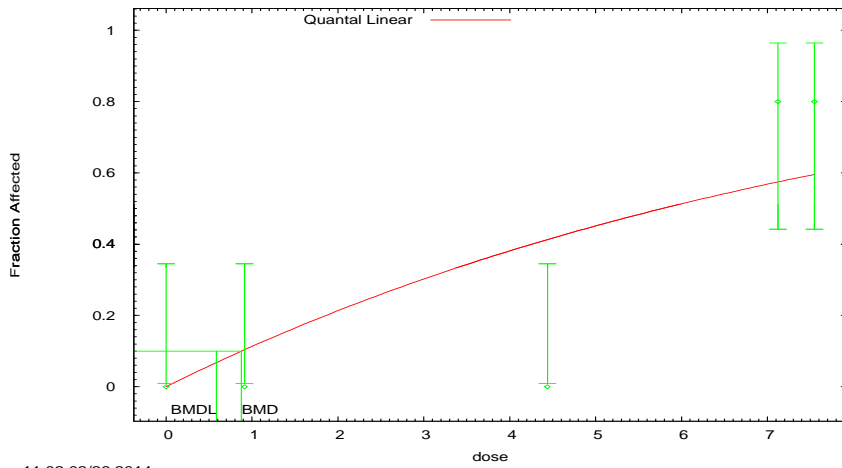

11:02 02/26 2014

**Report:**

**Experimental Pathology Laboratories, Inc. (2011). 90-Day Inhalation Toxicity Study of Naphthalene Vapor in Fischer 344 Rats. Submitted to The Hamner Institutes for Health Sciences, January 31.**

## **APPENDIX 4**

**Histopathology Report (62 pages)**

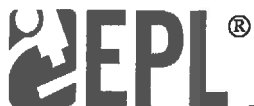

**90-DAY INHALATION TOXICITY STUDY  
OF NAPHTHALENE VAPOR IN  
FISCHER 344 RATS**

**THE HAMNER INSTITUTES FOR  
HEALTH SCIENCES STUDY ID: 09001**

**EPL PROJECT NO. 304-440**

**FINAL PATHOLOGY REPORT**

**Submitted to:**

**The Hamner Institutes for Health Sciences  
6 Davis Drive  
P.O. Box 12137  
Research Triangle Park, NC 27709-2137**

**Submitted by:**

**Experimental Pathology Laboratories, Inc.  
P.O. Box 12766  
Research Triangle Park, NC 27709**

**615 Davis Drive, Suite 500  
Durham, NC 27713**

**January 31, 2011**

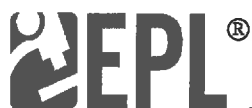

90-DAY INHALATION TOXICITY STUDY  
OF NAPHTHALENE VAPOR IN  
FISCHER 344 RATS

THE HAMNER INSTITUTES FOR  
HEALTH SCIENCES STUDY ID: 09001

EPL PROJECT NO. 304-440

FINAL PATHOLOGY REPORT

TABLE OF CONTENTS

|                                            | <u>Page</u> |
|--------------------------------------------|-------------|
| INTRODUCTION .....                         | 3           |
| METHODS.....                               | 3           |
| RESULTS.....                               | 4           |
| SUMMARY.....                               | 9           |
| REFERENCE.....                             | 10          |
| REGULATORY COMPLIANCE STATEMENT .....      | 11          |
| QUALITY ASSURANCE FINAL CERTIFICATION..... | 12          |
| <b>90-DAY SACRIFICE</b>                    |             |
| SUMMARY INCIDENCE TABLES.....              | I-1         |
| HISTOPATHOLOGY INCIDENCE TABLES.....       | II-1        |
| <b>RECOVERY SACRIFICE</b>                  |             |
| SUMMARY INCIDENCE TABLES.....              | III-1       |
| HISTOPATHOLOGY INCIDENCE TABLES.....       | IV-1        |



90-DAY INHALATION TOXICITY STUDY  
OF NAPHTHALENE VAPOR IN  
FISCHER 344 RATS

THE HAMNER INSTITUTES FOR  
HEALTH SCIENCES STUDY ID: 09001

EPL PROJECT NO. 304-440

FINAL PATHOLOGY REPORT

### **INTRODUCTION**

The primary objective of this study was to establish an exposure-response relationship for nasal epithelial effects in Fischer 344 (F344) rats in a 90-day study using whole body exposures of 6 hours/day, 5 days/week to naphthalene vapor at concentrations of 0 ppm, 0.1 ppm, 1.0 ppm, 10 ppm or 30 ppm. To determine and evaluate recovery from any effects, groups of similarly exposed rats were necropsied and evaluated after a recovery period of 4 weeks.

### **METHODS**

Six standard nose sections (Morgan, et. al, 1993) were processed and stained with H&E stains and evaluated by light microscopy. The sections (from anterior to posterior) are labeled Tip, Level 1, Level 2, Level 3, Level 4 and Level 5. The Tip and Level 1 have mostly squamous and respiratory epithelium. Olfactory epithelium is first observed along the dorsal meatus of Level 2. Level 3 has olfactory epithelium lining the dorsal meatus, dorsal tips of an ethmoid turbinate first appearing in the dorsal meatus lumen and sometimes low in the nasal septum (the tiny "septal olfactory organ" which is also referred to as the Organ of Masera), the Levels 4 and 5 have mostly olfactory epithelium dorsally lining the meatus, ethmoid turbinates and most of the nasal septum.

TABLE 1. EXPERIMENTAL DESIGN – ANIMAL DISPOSITION

| Naphthalene Concentration | Group                 | Animal Numbers                       |                                      |
|---------------------------|-----------------------|--------------------------------------|--------------------------------------|
|                           |                       | Male                                 | Female                               |
| 0 ppm                     | Control (1)           | 101-110 (Core)<br>111-120 (Recovery) | 301-310 (Core)<br>311-320 (Recovery) |
| 0.1 ppm                   | Low (2)               | 136-145 (Core)<br>146-155 (Recovery) | 336-345 (Core)<br>346-355 (Recovery) |
| 1.0 ppm                   | Intermediate Low (3)  | 171-180 (Core)<br>181-190 (Recovery) | 371-380 (Core)<br>381-390 (Recovery) |
| 10 ppm                    | Intermediate High (4) | 206-215 (Core)<br>216-225 (Recovery) | 406-415 (Core)<br>416-425 (Recovery) |
| 30 ppm                    | High (5)              | 241-250 (Core)<br>215-260 (Recovery) | 441-450 (Core)<br>451-460 (Recovery) |

TABLE 2. SUMMARY OF EXPERIMENTAL DESIGN

| Concentration (Naphthalene) | Number of rats/sex           |                                |
|-----------------------------|------------------------------|--------------------------------|
|                             | Necropsy 1 Day Post Exposure | Necropsy 4 Weeks Post Exposure |
| Control                     | 10                           | 10                             |
| Low (0.1 ppm)               | 10                           | 10                             |
| Intermediate Low (1.0 ppm)  | 10                           | 10                             |
| Intermediate High (10 ppm)  | 10                           | 10                             |
| High (30 ppm)               | 10                           | 10                             |

**RESULTS**

The appended tables contain the complete individual animal Histopathology Incidence Tables (HITs) and the Summary Incidence Tables (SITs). Tables 3 – 14 summarize selected histological findings in the nose.

Lesions that could be related to exposure to naphthalene were not observed in the Nose Level Tip and Nose Level 1 of male or female rats. The variable and often prominent mixed inflammatory cell infiltrates commonly present in these two anterior sections were not related to naphthalene exposure. Occasionally, there appeared to be a hair shaft present in the inflamed nasal tissues, otherwise a cause could not be determined.

More posterior (Level 2), lesions related to exposure to naphthalene were clearly observed in the transitional/respiratory epithelium of male and female F344 rats. These changes were observed in the transitional/respiratory epithelium of the lateral walls of Nose Level 2 and characterized by an increase in the thickness of the epithelium (from a normal 1 cell

layer of cuboidal or low columnar epithelia to 2-3 cell layers thick with an increased basophilic appearance). In rats exposed to 1 ppm the transitional/respiratory epithelium was minimally hyperplastic in males and females and that epithelium was minimally to mildly hyperplastic when they were exposed to 10 ppm or 30 ppm. Rats exposed to 10 ppm or 30 ppm commonly also had minimal squamous metaplasia (the superficial epithelial cell layer being horizontal to the basement membrane) of the transitional/respiratory epithelium of the same region. Male and female rats in the 1 ppm, 10 ppm and 30 ppm recovery groups had remarkable recovery of the squamous metaplasia and hyperplasia of the transitional/respiratory epithelium observed in the lateral wall of Level 2 (only one male from the 10 ppm group had residual minimal epithelial hyperplasia).

TABLE 3. Incidence of Transitional/Respiratory Epithelial Hyperplasia in Males - Core

|              | Control | 0.1 ppm | 1.0 ppm | 10 ppm | 30 ppm |
|--------------|---------|---------|---------|--------|--------|
| Nose level 2 | 0/10    | 0/10    | 10/10   | 10/10  | 10/10  |

TABLE 4. Incidence of Transitional/Respiratory Epithelial Hyperplasia in Males - Recovery

|              | Control | 0.1 ppm | 1.0 ppm | 10 ppm | 30 ppm |
|--------------|---------|---------|---------|--------|--------|
| Nose level 2 | 0/10    | 0/10    | 0/10    | 1/9    | 0/10   |

TABLE 5. Incidence of Transitional/Respiratory Epithelial Hyperplasia in Females - Core

|              | Control | 0.1 ppm | 1.0 ppm | 10 ppm | 30 ppm |
|--------------|---------|---------|---------|--------|--------|
| Nose level 2 | 0/10    | 0/10    | 10/10   | 9/10   | 9/10   |

TABLE 6. Incidence of Transitional/Respiratory Epithelial Hyperplasia in Females - Recovery

|              | Control | 0.1 ppm | 1.0 ppm | 10 ppm | 30 ppm |
|--------------|---------|---------|---------|--------|--------|
| Nose level 2 | 0/10    | 0/10    | 0/10    | 0/10   | 0/10   |

The olfactory epithelial degeneration that was observed at 1 ppm in the two previous studies (1-day and 5-day) was not evident in this study. Sections of nose did not consistently contain the nasal septal organ on Level 3 (the most sensitive location observed in the prior two

studies). When sections of nasal septal organs were present, no changes could be appreciated regardless of exposure group.

The other lesions clearly related to exposure to naphthalene were observed in the olfactory epithelium. These changes were diagnosed as olfactory epithelial degeneration/necrosis. Among the predominately degenerative lesions was evidence of prior and ongoing necrosis. The lesions were generally multifocal and were characterized by cytoplasmic vacuolation, loss of proper epithelial orientation, thinning of the epithelial layer due to decreased olfactory epithelial cells, pyknotic and karyorrhectic nuclei and occasionally sloughing of the epithelium. There were some areas of re-epithelialization, beneath the sloughed epithelium, that sometimes covered the surface with flattened cells similar to squamous cells but not layered enough to call squamous metaplasia in most cases. Occasionally respiratory epithelial metaplasia of the olfactory epithelium (columnar ciliated cells replacing olfactory epithelium) was observed as a sequel to the degeneration and necrosis that had occurred. Minimal mixed inflammatory cell infiltration was present in the lamina propria and occasionally neutrophils were seen free in the nasal lumen.

Associated with the degenerative changes in the olfactory epithelium was basal cell hyperplasia characterized by increase numbers of basal cells per unit length of the epithelium underlying the olfactory neurons and sustentacular cells. The basal cells often became rounded (instead of flattened), crowded, and frequently oriented perpendicular to the basement membrane. Often the basal cell nuclei were double to triple-layered and occasionally a few small foci could be seen deeper in the lamina propria.

Overall, the induced olfactory epithelial changes were relatively consistent in incidence and severity between male and female F344 rats.

Neither sex of F344 rats exposed to 0.1 ppm or 1.0 ppm of naphthalene had lesions related to exposure in the olfactory epithelium.

In rats exposed to 10 ppm of naphthalene and sacrificed one day after the end of exposure, prominent olfactory epithelial lesions were evident in all male and female F344 rats in most nose sections in all nose levels (2, 3, 4, and 5) containing olfactory epithelium. The olfactory lesions were similar in male and female rats. Most of the olfactory epithelium lining the dorsal meatus of Level 2 was degenerative, which consisted of a prominent loss of neuronal cells and disorganization of residual sustentacular cells. In this 10 ppm group, the Level 3

sections now had lesions observed extensively in the dorsal meatus. The olfactory epithelium of Levels 4 and 5 had multifocal to confluent areas of degeneration/necrosis located in the dorsal meatus, along the nasal septum, in ethmoid turbinates in proximity to the septum and multifocally in the ethmoid turbinate lateral aspects.

In general, the olfactory epithelial degeneration/necrosis was associated with a relatively inconspicuous mixed cell inflammation that was not diagnosed separately.

The rats exposed to 10 ppm of naphthalene and allowed to recover for 4 weeks all showed a similar remarkable degree of olfactory neuron recovery, but most still had evidence of residual olfactory epithelial degeneration. Many lesions seem to have repopulated with neuronal cells but remained minimally thinner (fewer cells in some areas), contained scattered rosettes, and had minimally disorganized foci in previously affected locations: nasal septum, dorsal meatus and ethmoid turbinates. Recovery appeared to be more complete in the more posterior sections that contained olfactory epithelium. Basal cell hyperplasia recovery seemed to lag olfactory neuron recovery. Most olfactory epithelial inflammatory changes were resolved.

The male and female rats exposed to 30 ppm of naphthalene had olfactory lesions that were qualitatively similar to those rats exposed to 10 ppm, but somewhat more severe. Recovery of the olfactory epithelium occurred, but was not as pronounced as seen at 10 ppm. Recovery appeared to be more complete in the more posterior sections that contained olfactory epithelium and again the basal cell hyperplasia recovery appeared to lag behind the olfactory neuronal recovery.

Table 7. Incidence of Olfactory Epithelial Degeneration/Necrosis in Males – Core

|              | Control | 0.1 ppm | 1.0 ppm | 10 ppm | 30 ppm |
|--------------|---------|---------|---------|--------|--------|
| Nose Level 2 | 0/10    | 0/10    | 0/10    | 8/10   | 10/10  |
| Nose Level 3 | 0/10    | 0/10    | 0/10    | 10/10  | 10/10  |
| Nose Level 4 | 0/10    | 0/10    | 0/10    | 10/10  | 10/10  |
| Nose Level 5 | 0/10    | 0/10    | 0/10    | 9/10   | 10/10  |

Table 8. Incidence of Olfactory Epithelial Degeneration/Necrosis in Males - Recovery

|              | Control | 0.1 ppm | 1.0 ppm | 10 ppm | 30 ppm |
|--------------|---------|---------|---------|--------|--------|
| Nose Level 2 | 0/10    | 0/10    | 0/10    | 6/9    | 8/10   |
| Nose Level 3 | 0/10    | 0/10    | 0/10    | 9/9    | 10/10  |
| Nose Level 4 | 0/10    | 0/10    | 0/10    | 8/9    | 10/10  |
| Nose Level 5 | 0/10    | 0/10    | 0/10    | 0/9    | 6/10   |

Table 9 Incidence of Olfactory Epithelial Degeneration/Necrosis in Females – Core

|              | Control | 0.1 ppm | 1.0 ppm | 10 ppm | 30 ppm |
|--------------|---------|---------|---------|--------|--------|
| Nose Level 2 | 0/10    | 0/10    | 0/10    | 10/10  | 10/10  |
| Nose Level 3 | 0/10    | 0/10    | 0/10    | 10/10  | 10/10  |
| Nose Level 4 | 0/10    | 0/10    | 0/10    | 10/10  | 10/10  |
| Nose Level 5 | 0/10    | 0/10    | 0/10    | 9/10   | 10/10  |

Table 10 Incidence of Olfactory Epithelial Degeneration/Necrosis in Females – Recovery

|              | Control | 0.1 ppm | 1.0 ppm | 10 ppm | 30 ppm |
|--------------|---------|---------|---------|--------|--------|
| Nose Level 2 | 0/10    | 0/10    | 0/10    | 5/10   | 8/10   |
| Nose Level 3 | 0/10    | 0/10    | 0/10    | 8/10   | 10/10  |
| Nose Level 4 | 0/10    | 0/10    | 0/10    | 7/10   | 10/10  |
| Nose Level 5 | 0/10    | 0/10    | 0/10    | 2/10   | 7/10   |

Table 11 Incidence of Olfactory Epithelial Basal Cell Hyperplasia in Males – Core

|              | Control | 0.1 ppm | 1.0 ppm | 10 ppm | 30 ppm |
|--------------|---------|---------|---------|--------|--------|
| Nose Level 2 | 0/10    | 0/10    | 0/10    | 7/10   | 10/10  |
| Nose Level 3 | 0/10    | 0/10    | 0/10    | 8/10   | 10/10  |
| Nose Level 4 | 0/10    | 0/10    | 0/10    | 9/10   | 10/10  |
| Nose Level 5 | 0/10    | 0/10    | 0/10    | 6/10   | 10/10  |

Table 12 Incidence of Olfactory Epithelial Basal Cell Hyperplasia in Males – Recovery

|              | Control | 0.1 ppm | 1.0 ppm | 10 ppm | 30 ppm |
|--------------|---------|---------|---------|--------|--------|
| Nose Level 2 | 0/10    | 0/10    | 0/10    | 8/9    | 8/10   |
| Nose Level 3 | 0/10    | 0/10    | 0/10    | 7/9    | 10/10  |
| Nose Level 4 | 0/10    | 0/10    | 0/10    | 6/9    | 10/10  |
| Nose Level 5 | 0/10    | 0/10    | 0/10    | 2/9    | 9/10   |

Table 13 Incidence of Olfactory Epithelial Basal Cell Hyperplasia in Females – Core

|              | Control | 0.1 ppm | 1.0 ppm | 10 ppm | 30 ppm |
|--------------|---------|---------|---------|--------|--------|
| Nose Level 2 | 0/10    | 0/10    | 0/10    | 10/10  | 10/10  |
| Nose Level 3 | 0/10    | 0/10    | 0/10    | 10/10  | 10/10  |
| Nose Level 4 | 0/10    | 0/10    | 0/10    | 10/10  | 10/10  |
| Nose Level 5 | 0/10    | 0/10    | 0/10    | 9/10   | 10/10  |

Table 14 Incidence of Olfactory Epithelial Basal Cell Hyperplasia Females – Recovery

|              | Control | 0.1 ppm | 1.0 ppm | 10 ppm | 30 ppm |
|--------------|---------|---------|---------|--------|--------|
| Nose Level 2 | 0/10    | 0/10    | 0/10    | 6/10   | 8/10   |
| Nose Level 3 | 0/10    | 0/10    | 0/10    | 10/10  | 10/10  |
| Nose Level 4 | 0/10    | 0/10    | 0/10    | 10/10  | 10/10  |
| Nose Level 5 | 0/10    | 0/10    | 0/10    | 6/10   | 10/10  |

An ancillary observation was recorded in some rats exposed to 1 ppm, 10 ppm, or 30 ppm of naphthalene. Nasopharyngeal duct goblet cell hyperplasia/hypertrophy appeared marginally related to exposure and was graded as minimal. It was diagnosed in 1 male exposed to 1 ppm, 5 females and 1 male exposed to 10 ppm, and 7 females and 5 males exposed to 30 ppm. In the 4 week recovery rats, it appeared as a residual lesion in only 1 male exposed to 10 ppm, and in 3 females that were exposed to 30 ppm.

### **SUMMARY**

Lesions clearly related to exposure to naphthalene were observed in the transitional/respiratory epithelium and in the olfactory epithelium. These changes were diagnosed as transitional/respiratory epithelial hyperplasia and squamous metaplasia. The olfactory epithelium had degeneration/necrosis and olfactory epithelial basal cell hyperplasia. Goblet cell hypertrophy/hyperplasia of the nasopharyngeal duct was a possible exposure related effect evident at the higher exposure levels.

Overall, the induced olfactory epithelial changes were relatively consistent in incidence and severity among male and female rats.

Female and male F344 rats exposed to 0.1 ppm or 1 ppm of naphthalene had no lesions in the olfactory epithelium.

In rats exposed to 1 ppm of naphthalene lesions related to exposure to naphthalene were only observed in the transitional/respiratory epithelium of the lateral wall of Nasal Level 2.

In rats exposed to 10 ppm and 30 ppm of naphthalene and sacrificed one day after the end of exposure had prominent olfactory epithelial lesions in male and female F344 rats in most nose sections in all nose levels (2, 3, 4, and 5) containing olfactory epithelium. The olfactory lesions were similar in these rats. Most of the olfactory epithelium lining the dorsal meatus of Level 2 was affected. In these two highest exposure groups, the Level 3 sections had lesions observed in the dorsal meatus. The olfactory epithelium of Levels 4 and 5 had multifocal to

confluent areas of degeneration located in the dorsal meatus, along the nasal septum, in ethmoid turbinates in proximity to the septum and multifocally in the ethmoid turbinate lateral aspects.

Rats exposed to naphthalene and then allowed to recover for 4 weeks, all showed a similar and remarkable degree of olfactory epithelial recovery, but most still had evidence of minimal residual olfactory epithelial degeneration. Basal cell hyperplasia underlying the olfactory epithelium was a lessened lesion but still an obvious change from normal.



\_\_\_\_\_  
RODNEY A. MILLER, D.V.M., Ph.D.  
Diplomate, ACVP  
Veterinary Pathologist

1-31-11

\_\_\_\_\_  
Date

RAM/dc

**REFERENCE:**

Morgan, K. T., Gross, E. A., Bonnefoi, M. 1993. Nasal structure, function, and toxicology. Chapter 2 in *Toxicology of the Lung* 2<sup>nd</sup> ed., D. E. Gardner et al. New York: Raven Press, Ltd.



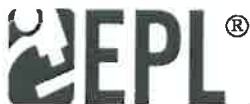

COMPLIANCE STATEMENT

|              |                                                                                  |                            |                              |
|--------------|----------------------------------------------------------------------------------|----------------------------|------------------------------|
| Client Name  | <u>The Hamner Institutes for Health Sciences</u>                                 | EPL Principal Investigator | <u>Dr. Gabrielle Willson</u> |
| Client Study | <u>Protocol No. 09001</u>                                                        | EPL Pathologist            | <u>Dr. Rodney Miller</u>     |
| Species      | <u>Fischer 344 Rats</u>                                                          | EPL Project Number         | <u>304-440</u>               |
| Study Title  | <u>90-Day Inhalation Toxicity Study of Naphthalene Vapor in Fischer 344 Rats</u> |                            |                              |
| Test Article | <u>Naphthalene</u>                                                               |                            |                              |

The tissue histopathology (H&E) evaluations were conducted in compliance with U.S. EPA Toxic Substances Control Act (TSCA) Good Laboratory Practices (GLP) as noted in Title 40 CFR Part 792.

  
EPL Principal Investigator

31<sup>st</sup> January 2011  
Date

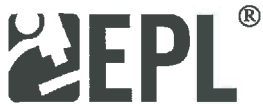

QUALITY ASSURANCE FINAL CERTIFICATION

Study Title: 90-Day Inhalation Toxicity Study of Naphthalene Vapor in Fischer 344 Rats

Client Study: Protocol No. 09001

EPL Principal Investigator: Dr. Gabrielle Willson

EPL Project Number: 304-440

EPL Pathologist: Dr. Rodney Miller

The following aspects of this study were inspected by the Quality Assurance Unit of Experimental Pathology Laboratories, Inc. Dates inspections were performed and findings reported to the EPL Principal Investigator and Management are indicated below.

| Area Inspected         | Dates                                                      |                                                            |
|------------------------|------------------------------------------------------------|------------------------------------------------------------|
|                        | Inspection                                                 | Reporting                                                  |
| EPL Project Sheets     | March 19, 2009;<br>October 14, 2009;<br>September 30, 2010 | March 19, 2009;<br>October 14, 2009;<br>September 30, 2010 |
| Project Setup          | November 20 & 30, 2009                                     | November 30, 2009                                          |
| Data Review            | July 6, 2010                                               | July 6, 2010                                               |
| Draft Pathology Report | December 3, 2009                                           | December 3, 2009                                           |
| Final Pathology Report | January 31, 2011                                           | January 31, 2011                                           |

|                                             |                  |
|---------------------------------------------|------------------|
| Date reported to Study Director/Management  | January 31, 2011 |
| Date of last quarterly facility inspection: | January 2011     |

Jane J Hollingsworth  
EPL Quality Assurance Unit

January 31, 2011  
Date

**90-DAY SACRIFICE**

**PROTOCOL NO. 09001  
EPL PROJECT NO. 304-440**

**SUMMARY INCIDENCE TABLES**  
**90-Day Sacrifice**

## SUMMARY INCIDENCE TABLE

09001  
90-Day Sacrifice  
Male Rat

|                                                                 | GROUP<br>0ppm | GROUP<br>0.1ppm | GROUP<br>1.0ppm | GROUP<br>10ppm | GROUP<br>30ppm |  |
|-----------------------------------------------------------------|---------------|-----------------|-----------------|----------------|----------------|--|
| Nose, Level 1 (NO. EXAMINED)                                    | (10)          | (10)            | (10)            | (10)           | (10)           |  |
| Transitional/Respiratory<br>Epithelium, Hyperplasia             | 1             | 1               | 2               |                |                |  |
| Transitional/Respiratory<br>Epithelium, Inflammation            | 6             | 6               | 5               | 5              | 4              |  |
| Transitional/Respiratory<br>Epithelium, Squamous,<br>Metaplasia | 1             | 1               |                 |                |                |  |
| Nose, Level 2 (NO. EXAMINED)                                    | (10)          | (10)            | (10)            | (10)           | (10)           |  |
| Olfactory Epithelium, Basal<br>Cell, Hyperplasia                |               |                 |                 | 7              | 10             |  |
| Olfactory Epithelium,<br>Degeneration/Necrosis                  |               |                 |                 | 8              | 10             |  |
| Olfactory Epithelium,<br>Inflammation                           |               |                 |                 |                | 1              |  |
| Transitional/Respiratory<br>Epithelium, Hyperplasia             |               |                 | 10              | 10             | 10             |  |
| Transitional/Respiratory<br>Epithelium, Inflammation            |               |                 |                 | 1              |                |  |
| Transitional/Respiratory<br>Epithelium, Squamous,<br>Metaplasia |               |                 |                 | 8              | 8              |  |
| Nose, Level 3 (NO. EXAMINED)                                    | (10)          | (10)            | (10)            | (10)           | (10)           |  |
| Olfactory Epithelium, Basal<br>Cell, Hyperplasia                |               |                 |                 | 8              | 10             |  |
| Olfactory Epithelium,<br>Degeneration/Necrosis                  |               |                 |                 | 10             | 10             |  |
| Nose, Level 4 (NO. EXAMINED)                                    | (10)          | (10)            | (10)            | (10)           | (10)           |  |
| Olfactory Epithelium, Basal<br>Cell, Hyperplasia                |               |                 |                 | 9              | 10             |  |
| Olfactory Epithelium,<br>Degeneration/Necrosis                  |               |                 |                 | 10             | 10             |  |
| Olfactory Epithelium,<br>Inflammation                           |               |                 |                 |                | 1              |  |
| Olfactory Epithelium,<br>Squamous, Hyperplasia                  |               |                 |                 |                | 1              |  |
| Nose, Level 5 (NO. EXAMINED)                                    | (10)          | (10)            | (10)            | (10)           | (10)           |  |
| Nasopharyngeal Duct, Goblet<br>Cell, Hypertrophy/Hyperplasia    |               |                 | 1               | 1              | 5              |  |
| Olfactory Epithelium, Basal<br>Cell, Hyperplasia                |               |                 |                 | 6              | 10             |  |



## SUMMARY INCIDENCE TABLE

09001  
90-Day Sacrifice  
Female Rat

|                                                                 | GROUP<br>0ppm | GROUP<br>0.1ppm | GROUP<br>1.0ppm | GROUP<br>10ppm | GROUP<br>30ppm |  |
|-----------------------------------------------------------------|---------------|-----------------|-----------------|----------------|----------------|--|
| Nose, Level 1 (NO. EXAMINED)                                    | (10)          | (10)            | (10)            | (9)            | (10)           |  |
| Transitional/Respiratory<br>Epithelium, Hyperplasia             |               |                 |                 |                |                |  |
| Transitional/Respiratory<br>Epithelium, Inflammation            | 9             | 8               | 8               | 6              | 8              |  |
| Transitional/Respiratory<br>Epithelium, Squamous,<br>Metaplasia |               |                 |                 |                |                |  |
| Nose, Level 2 (NO. EXAMINED)                                    | (10)          | (10)            | (10)            | (10)           | (10)           |  |
| Olfactory Epithelium, Basal<br>Cell, Hyperplasia                |               |                 |                 | 10             | 10             |  |
| Olfactory Epithelium,<br>Degeneration/Necrosis                  |               |                 |                 | 10             | 10             |  |
| Olfactory Epithelium,<br>Inflammation                           |               |                 |                 |                |                |  |
| Transitional/Respiratory<br>Epithelium, Hyperplasia             |               |                 | 10              | 9              | 9              |  |
| Transitional/Respiratory<br>Epithelium, Inflammation            |               |                 |                 |                |                |  |
| Transitional/Respiratory<br>Epithelium, Squamous,<br>Metaplasia |               |                 |                 | 9              | 8              |  |
| Nose, Level 3 (NO. EXAMINED)                                    | (10)          | (10)            | (10)            | (10)           | (10)           |  |
| Olfactory Epithelium, Basal<br>Cell, Hyperplasia                |               |                 |                 | 10             | 10             |  |
| Olfactory Epithelium,<br>Degeneration/Necrosis                  |               |                 |                 | 10             | 10             |  |
| Nose, Level 4 (NO. EXAMINED)                                    | (10)          | (10)            | (10)            | (10)           | (10)           |  |
| Olfactory Epithelium, Basal<br>Cell, Hyperplasia                |               |                 |                 | 10             | 10             |  |
| Olfactory Epithelium,<br>Degeneration/Necrosis                  |               |                 |                 | 10             | 10             |  |
| Olfactory Epithelium,<br>Inflammation                           |               |                 |                 |                |                |  |
| Olfactory Epithelium,<br>Squamous, Hyperplasia                  |               |                 |                 |                |                |  |
| Nose, Level 5 (NO. EXAMINED)                                    | (10)          | (10)            | (10)            | (10)           | (10)           |  |
| Nasopharyngeal Duct, Goblet<br>Cell, Hypertrophy/Hyperplasia    |               |                 |                 | 5              | 7              |  |
| Olfactory Epithelium, Basal<br>Cell, Hyperplasia                |               |                 |                 | 9              | 10             |  |





**HISTOPATHOLOGY INCIDENCE TABLES**  
**90-Day Sacrifice**

# HISTOPATHOLOGY INCIDENCE TABLE

GROUP  
0ppm

09001  
90-Day Sacrifice  
Male Rat

A  
N  
I  
M  
A  
L

|                                                           | 1 | 1 | 1 | 1 | 1 | 1 | 1 | 1 | 1 | 1 |
|-----------------------------------------------------------|---|---|---|---|---|---|---|---|---|---|
|                                                           | 0 | 0 | 0 | 0 | 0 | 0 | 0 | 0 | 0 | 1 |
|                                                           | 1 | 2 | 3 | 4 | 5 | 6 | 7 | 8 | 9 | 0 |
| Nose, Level 1                                             | X |   | X | X |   |   |   | X |   |   |
| Transitional/Respiratory Epithelium, Hyperplasia          |   | 1 |   |   |   |   |   |   |   |   |
| Transitional/Respiratory Epithelium, Inflammation         |   | 1 |   |   | 1 | 1 | 2 |   | 2 | 1 |
| Transitional/Respiratory Epithelium, Squamous, Metaplasia |   | 1 |   |   |   |   |   |   |   |   |
| Nose, Level 2                                             | X | X | X | X | X | X | X | X | X | X |
| Olfactory Epithelium, Basal Cell, Hyperplasia             |   |   |   |   |   |   |   |   |   |   |
| Olfactory Epithelium, Degeneration/Necrosis               |   |   |   |   |   |   |   |   |   |   |
| Olfactory Epithelium, Inflammation                        |   |   |   |   |   |   |   |   |   |   |
| Transitional/Respiratory Epithelium, Hyperplasia          |   |   |   |   |   |   |   |   |   |   |
| Transitional/Respiratory Epithelium, Inflammation         |   |   |   |   |   |   |   |   |   |   |
| Transitional/Respiratory Epithelium, Squamous, Metaplasia |   |   |   |   |   |   |   |   |   |   |
| Nose, Level 3                                             | X | X | X | X | X | X | X | X | X | X |
| Olfactory Epithelium, Basal Cell, Hyperplasia             |   |   |   |   |   |   |   |   |   |   |
| Olfactory Epithelium, Degeneration/Necrosis               |   |   |   |   |   |   |   |   |   |   |
| Nose, Level 4                                             | X | X | X | X | X | X | X | X | X | X |
| Olfactory Epithelium, Basal Cell, Hyperplasia             |   |   |   |   |   |   |   |   |   |   |
| Olfactory Epithelium, Degeneration/Necrosis               |   |   |   |   |   |   |   |   |   |   |
| Olfactory Epithelium, Inflammation                        |   |   |   |   |   |   |   |   |   |   |
| Olfactory Epithelium, Squamous, Hyperplasia               |   |   |   |   |   |   |   |   |   |   |

Key : X-Not Remarkable N-No Section I-Incomplete A-Autolysis  
 1-minimal 2-slight/mild 3-moderate 4-moderately severe 5-severe/high  
 P-Present B-Benign M-Malignant  
 m-missing one paired organ u-unscheduled sac./death

# HISTOPATHOLOGY INCIDENCE TABLE

GROUP  
Oppm

09001  
90-Day Sacrifice  
Male Rat

A  
N  
I  
M  
A  
L

|                                                           | 1 | 2 | 3 | 4 | 5 | 6 | 7 | 8 | 9 | 0 |  |  |  |  |  |  |  |  |
|-----------------------------------------------------------|---|---|---|---|---|---|---|---|---|---|--|--|--|--|--|--|--|--|
|                                                           | 1 | 1 | 1 | 1 | 1 | 1 | 1 | 1 | 1 | 1 |  |  |  |  |  |  |  |  |
|                                                           | 0 | 0 | 0 | 0 | 0 | 0 | 0 | 0 | 0 | 1 |  |  |  |  |  |  |  |  |
|                                                           | 1 | 2 | 3 | 4 | 5 | 6 | 7 | 8 | 9 | 0 |  |  |  |  |  |  |  |  |
| Nose, Level 5                                             | X | X | X | X | X | X | X | X | X | X |  |  |  |  |  |  |  |  |
| Nasopharyngeal Duct, Goblet Cell, Hypertrophy/Hyperplasia |   |   |   |   |   |   |   |   |   |   |  |  |  |  |  |  |  |  |
| Olfactory Epithelium, Basal Cell, Hyperplasia             |   |   |   |   |   |   |   |   |   |   |  |  |  |  |  |  |  |  |
| Olfactory Epithelium, Degeneration/Necrosis               |   |   |   |   |   |   |   |   |   |   |  |  |  |  |  |  |  |  |
| Olfactory Epithelium, Squamous, Metaplasia                |   |   |   |   |   |   |   |   |   |   |  |  |  |  |  |  |  |  |
| Nose, Tip                                                 | X | X |   |   |   |   |   | X | X | X |  |  |  |  |  |  |  |  |
| Squamous Epithelium, Hyperplasia                          |   |   | 1 |   | 1 |   |   |   |   |   |  |  |  |  |  |  |  |  |
| Squamous Epithelium, Inflammation                         |   |   | 1 | 1 | 2 | 1 |   |   |   | 1 |  |  |  |  |  |  |  |  |
|                                                           |   |   |   |   |   |   |   |   |   |   |  |  |  |  |  |  |  |  |

Key : X-Not Remarkable N-No Section I-Incomplete A=Autolysis  
 1-minimal 2-slight/mild 3-moderate 4-moderately severe 5-severe/high  
 P=Present B-Benign M=Malignant  
 m=missing one paired organ u=unsheduled sac./death

# HISTOPATHOLOGY INCIDENCE TABLE

GROUP  
0.1ppm

09001  
90-Day Sacrifice  
Male Rat

A  
N  
I  
M  
A  
L

|                                                           | 1 | 1 | 1 | 1 | 1 | 1 | 1 | 1 | 1 | 1 | 1 | 1 | 1 | 1 | 1 | 1 | 1 | 1 | 1 |  |
|-----------------------------------------------------------|---|---|---|---|---|---|---|---|---|---|---|---|---|---|---|---|---|---|---|--|
|                                                           | 3 | 3 | 3 | 3 | 4 | 4 | 4 | 4 | 4 | 4 | 4 | 4 | 4 | 4 | 4 | 4 | 4 | 4 | 4 |  |
|                                                           | 6 | 7 | 8 | 9 | 0 | 1 | 2 | 3 | 4 | 5 |   |   |   |   |   |   |   |   |   |  |
| Nose, Level 1                                             |   |   | X |   |   | X | X |   |   | X |   |   |   |   |   |   |   |   |   |  |
| Transitional/Respiratory Epithelium, Hyperplasia          |   |   |   |   | 1 |   |   |   |   |   |   |   |   |   |   |   |   |   |   |  |
| Transitional/Respiratory Epithelium, Inflammation         | 2 | 1 |   | 1 | 2 |   |   | 2 | 1 |   |   |   |   |   |   |   |   |   |   |  |
| Transitional/Respiratory Epithelium, Squamous, Metaplasia |   |   |   |   | 1 |   |   |   |   |   |   |   |   |   |   |   |   |   |   |  |
| Nose, Level 2                                             | X | X | X | X | X | X | X | X | X | X |   |   |   |   |   |   |   |   |   |  |
| Olfactory Epithelium, Basal Cell, Hyperplasia             |   |   |   |   |   |   |   |   |   |   |   |   |   |   |   |   |   |   |   |  |
| Olfactory Epithelium, Degeneration/Necrosis               |   |   |   |   |   |   |   |   |   |   |   |   |   |   |   |   |   |   |   |  |
| Olfactory Epithelium, Inflammation                        |   |   |   |   |   |   |   |   |   |   |   |   |   |   |   |   |   |   |   |  |
| Transitional/Respiratory Epithelium, Hyperplasia          |   |   |   |   |   |   |   |   |   |   |   |   |   |   |   |   |   |   |   |  |
| Transitional/Respiratory Epithelium, Inflammation         |   |   |   |   |   |   |   |   |   |   |   |   |   |   |   |   |   |   |   |  |
| Transitional/Respiratory Epithelium, Squamous, Metaplasia |   |   |   |   |   |   |   |   |   |   |   |   |   |   |   |   |   |   |   |  |
| Nose, Level 3                                             | X | X | X | X | X | X | X | X | X | X |   |   |   |   |   |   |   |   |   |  |
| Olfactory Epithelium, Basal Cell, Hyperplasia             |   |   |   |   |   |   |   |   |   |   |   |   |   |   |   |   |   |   |   |  |
| Olfactory Epithelium, Degeneration/Necrosis               |   |   |   |   |   |   |   |   |   |   |   |   |   |   |   |   |   |   |   |  |
| Nose, Level 4                                             | X | X | X | X | X | X | X | X | X | X |   |   |   |   |   |   |   |   |   |  |
| Olfactory Epithelium, Basal Cell, Hyperplasia             |   |   |   |   |   |   |   |   |   |   |   |   |   |   |   |   |   |   |   |  |
| Olfactory Epithelium, Degeneration/Necrosis               |   |   |   |   |   |   |   |   |   |   |   |   |   |   |   |   |   |   |   |  |
| Olfactory Epithelium, Inflammation                        |   |   |   |   |   |   |   |   |   |   |   |   |   |   |   |   |   |   |   |  |
| Olfactory Epithelium, Squamous, Hyperplasia               |   |   |   |   |   |   |   |   |   |   |   |   |   |   |   |   |   |   |   |  |

Key : X=Not Remarkable N=No Section I=Incomplete A=Autolysis  
 1=minimal 2=slight/mild 3=moderate 4=moderately severe 5=severe/high  
 P=Present B=Benign M=Malignant  
 m=missing one paired organ u=unscheduled sac./death

# HISTOPATHOLOGY INCIDENCE TABLE

GROUP  
0.1ppm

09001  
90-Day Sacrifice  
Male Rat

A  
N  
I  
M  
A  
L

|                                                           | 1 | 2 | 3 | 4 | 5 | 6 | 7 | 8 | 9 | 10 | 11 | 12 | 13 | 14 | 15 | 16 | 17 | 18 | 19 | 20 |
|-----------------------------------------------------------|---|---|---|---|---|---|---|---|---|----|----|----|----|----|----|----|----|----|----|----|
|                                                           | 1 | 1 | 1 | 1 | 1 | 1 | 1 | 1 | 1 | 1  | 1  | 1  | 1  | 1  |    |    |    |    |    |    |
|                                                           | 3 | 3 | 3 | 3 | 4 | 4 | 4 | 4 | 4 | 4  | 4  | 4  | 4  | 4  |    |    |    |    |    |    |
|                                                           | 6 | 7 | 8 | 9 | 0 | 1 | 2 | 3 | 4 | 5  |    |    |    |    |    |    |    |    |    |    |
| Nose, Level 5                                             | X | X | X | X | X | X | X | X | X | X  | X  | X  | X  | X  |    |    |    |    |    |    |
| Nasopharyngeal Duct, Goblet Cell, Hypertrophy/Hyperplasia |   |   |   |   |   |   |   |   |   |    |    |    |    |    |    |    |    |    |    |    |
| Olfactory Epithelium, Basal Cell, Hyperplasia             |   |   |   |   |   |   |   |   |   |    |    |    |    |    |    |    |    |    |    |    |
| Olfactory Epithelium, Degeneration/Necrosis               |   |   |   |   |   |   |   |   |   |    |    |    |    |    |    |    |    |    |    |    |
| Olfactory Epithelium, Squamous, Metaplasia                |   |   |   |   |   |   |   |   |   |    |    |    |    |    |    |    |    |    |    |    |
| Nose, Tip                                                 | X |   |   |   | X | X | X |   |   |    |    |    |    |    |    |    |    |    |    |    |
| Squamous Epithelium, Hyperplasia                          |   |   |   |   |   |   |   |   |   |    |    |    |    |    |    |    |    |    |    |    |
| Squamous Epithelium, Inflammation                         |   |   |   |   |   |   |   |   |   |    |    |    |    |    |    |    |    |    |    |    |
|                                                           |   | 2 | 2 | 2 |   |   |   |   |   |    |    |    |    |    |    |    |    |    |    |    |
|                                                           |   |   |   |   |   |   |   |   |   |    |    |    |    |    |    |    |    |    |    |    |
|                                                           |   |   |   |   |   |   |   |   |   |    |    |    |    |    |    |    |    |    |    |    |
|                                                           |   |   |   |   |   |   |   |   |   |    |    |    |    |    |    |    |    |    |    |    |
|                                                           |   |   |   |   |   |   |   |   |   |    |    |    |    |    |    |    |    |    |    |    |
|                                                           |   |   |   |   |   |   |   |   |   |    |    |    |    |    |    |    |    |    |    |    |
|                                                           |   |   |   |   |   |   |   |   |   |    |    |    |    |    |    |    |    |    |    |    |
|                                                           |   |   |   |   |   |   |   |   |   |    |    |    |    |    |    |    |    |    |    |    |
|                                                           |   |   |   |   |   |   |   |   |   |    |    |    |    |    |    |    |    |    |    |    |
|                                                           |   |   |   |   |   |   |   |   |   |    |    |    |    |    |    |    |    |    |    |    |
|                                                           |   |   |   |   |   |   |   |   |   |    |    |    |    |    |    |    |    |    |    |    |
|                                                           |   |   |   |   |   |   |   |   |   |    |    |    |    |    |    |    |    |    |    |    |
|                                                           |   |   |   |   |   |   |   |   |   |    |    |    |    |    |    |    |    |    |    |    |
|                                                           |   |   |   |   |   |   |   |   |   |    |    |    |    |    |    |    |    |    |    |    |
|                                                           |   |   |   |   |   |   |   |   |   |    |    |    |    |    |    |    |    |    |    |    |
|                                                           |   |   |   |   |   |   |   |   |   |    |    |    |    |    |    |    |    |    |    |    |
|                                                           |   |   |   |   |   |   |   |   |   |    |    |    |    |    |    |    |    |    |    |    |
|                                                           |   |   |   |   |   |   |   |   |   |    |    |    |    |    |    |    |    |    |    |    |
|                                                           |   |   |   |   |   |   |   |   |   |    |    |    |    |    |    |    |    |    |    |    |
|                                                           |   |   |   |   |   |   |   |   |   |    |    |    |    |    |    |    |    |    |    |    |

Key : X=Not Remarkable N=No Section I=Incomplete A=Autolysis  
 1=minimal 2=slight/mild 3=moderate 4=moderately severe 5=severe/high  
 P=Present B=Benign M=Malignant  
 m=missing one paired organ u=unscheduled sac./death

# HISTOPATHOLOGY INCIDENCE TABLE

GROUP  
1.0ppm

09001  
90-Day Sacrifice  
Male Rat

A  
N  
I  
M  
A  
L

|                                                           | 1 | 1 | 1 | 1 | 1 | 1 | 1 | 1 | 1 | 1 | 1 | 1 | 1 | 1 | 1 | 1 | 1 | 1 | 1 | 1 |
|-----------------------------------------------------------|---|---|---|---|---|---|---|---|---|---|---|---|---|---|---|---|---|---|---|---|
|                                                           | 7 | 7 | 7 | 7 | 7 | 7 | 7 | 7 | 7 | 7 | 7 | 7 | 7 | 7 | 7 | 7 | 7 | 7 | 7 | 7 |
|                                                           | 1 | 2 | 3 | 4 | 5 | 6 | 7 | 8 | 9 | 0 |   |   |   |   |   |   |   |   |   |   |
| Nose, Level 1                                             |   | X | X | X |   |   | X | X |   |   |   |   |   |   |   |   |   |   |   |   |
| Transitional/Respiratory Epithelium, Hyperplasia          | 1 |   |   |   |   | 1 |   |   |   |   |   |   |   |   |   |   |   |   |   |   |
| Transitional/Respiratory Epithelium, Inflammation         | 2 |   |   |   | 2 | 1 |   |   | 1 | 2 |   |   |   |   |   |   |   |   |   |   |
| Transitional/Respiratory Epithelium, Squamous, Metaplasia |   |   |   |   |   |   |   |   |   |   |   |   |   |   |   |   |   |   |   |   |
| Nose, Level 2                                             |   |   |   |   |   |   |   |   |   |   |   |   |   |   |   |   |   |   |   |   |
| Olfactory Epithelium, Basal Cell, Hyperplasia             |   |   |   |   |   |   |   |   |   |   |   |   |   |   |   |   |   |   |   |   |
| Olfactory Epithelium, Degeneration/Necrosis               |   |   |   |   |   |   |   |   |   |   |   |   |   |   |   |   |   |   |   |   |
| Olfactory Epithelium, Inflammation                        |   |   |   |   |   |   |   |   |   |   |   |   |   |   |   |   |   |   |   |   |
| Transitional/Respiratory Epithelium, Hyperplasia          | 1 | 1 | 1 | 1 | 1 | 1 | 1 | 1 | 1 | 1 |   |   |   |   |   |   |   |   |   |   |
| Transitional/Respiratory Epithelium, Inflammation         |   |   |   |   |   |   |   |   |   |   |   |   |   |   |   |   |   |   |   |   |
| Transitional/Respiratory Epithelium, Squamous, Metaplasia |   |   |   |   |   |   |   |   |   |   |   |   |   |   |   |   |   |   |   |   |
| Nose, Level 3                                             | X | X | X | X | X | X | X | X | X | X |   |   |   |   |   |   |   |   |   |   |
| Olfactory Epithelium, Basal Cell, Hyperplasia             |   |   |   |   |   |   |   |   |   |   |   |   |   |   |   |   |   |   |   |   |
| Olfactory Epithelium, Degeneration/Necrosis               |   |   |   |   |   |   |   |   |   |   |   |   |   |   |   |   |   |   |   |   |
| Nose, Level 4                                             | X | X | X | X | X | X | X | X | X | X |   |   |   |   |   |   |   |   |   |   |
| Olfactory Epithelium, Basal Cell, Hyperplasia             |   |   |   |   |   |   |   |   |   |   |   |   |   |   |   |   |   |   |   |   |
| Olfactory Epithelium, Degeneration/Necrosis               |   |   |   |   |   |   |   |   |   |   |   |   |   |   |   |   |   |   |   |   |
| Olfactory Epithelium, Inflammation                        |   |   |   |   |   |   |   |   |   |   |   |   |   |   |   |   |   |   |   |   |
| Olfactory Epithelium, Squamous, Hyperplasia               |   |   |   |   |   |   |   |   |   |   |   |   |   |   |   |   |   |   |   |   |

Key : X=Not Remarkable N=No Section I=Incomplete A=Autolysis  
 1=minimal 2=slight/mild 3=moderate 4=moderately severe 5=severe/high  
 P=Present B=Benign M=Malignant  
 m=missing one paired organ u=unscheduled sac./death



# HISTOPATHOLOGY INCIDENCE TABLE

GROUP  
10ppm

09001  
90-Day Sacrifice  
Male Rat

A  
N  
I  
M  
A  
L

|                                                           | 2 | 2 | 2 | 2 | 2 | 2 | 2 | 2 | 2 | 2 |
|-----------------------------------------------------------|---|---|---|---|---|---|---|---|---|---|
|                                                           | 0 | 0 | 0 | 0 | 1 | 1 | 1 | 1 | 1 | 1 |
|                                                           | 6 | 7 | 8 | 9 | 0 | 1 | 2 | 3 | 4 | 5 |
| Nose, Level 1                                             |   |   | X | X | X |   |   |   | X | X |
| Transitional/Respiratory Epithelium, Hyperplasia          |   |   |   |   |   |   |   |   |   |   |
| Transitional/Respiratory Epithelium, Inflammation         | 1 | 1 |   |   |   | 2 | 1 | 1 |   |   |
| Transitional/Respiratory Epithelium, Squamous, Metaplasia |   |   |   |   |   |   |   |   |   |   |
| Nose, Level 2                                             |   |   |   |   |   |   |   |   |   |   |
| Olfactory Epithelium, Basal Cell, Hyperplasia             | 2 | 1 | 1 | 1 | 2 |   |   |   | 1 | 2 |
| Olfactory Epithelium, Degeneration/Necrosis               | 2 | 2 | 2 | 1 | 2 |   | 2 |   | 2 | 2 |
| Olfactory Epithelium, Inflammation                        |   |   |   |   |   |   |   |   |   |   |
| Transitional/Respiratory Epithelium, Hyperplasia          | 1 | 2 | 2 | 2 | 1 | 1 | 1 | 2 | 1 | 1 |
| Transitional/Respiratory Epithelium, Inflammation         |   |   |   |   |   | 1 |   |   |   |   |
| Transitional/Respiratory Epithelium, Squamous, Metaplasia | 2 | 1 |   | 1 |   | 1 | 1 | 1 | 1 | 1 |
| Nose, Level 3                                             |   |   |   |   |   |   |   |   |   |   |
| Olfactory Epithelium, Basal Cell, Hyperplasia             | 1 | 1 | 1 | 1 | 1 |   |   | 1 | 1 | 1 |
| Olfactory Epithelium, Degeneration/Necrosis               | 1 | 1 | 2 | 2 | 2 | 1 | 1 | 2 | 1 | 1 |
| Nose, Level 4                                             |   |   |   |   |   |   |   |   |   |   |
| Olfactory Epithelium, Basal Cell, Hyperplasia             | 1 | 1 | 1 | 1 | 2 |   | 1 | 1 | 1 | 1 |
| Olfactory Epithelium, Degeneration/Necrosis               | 2 | 2 | 2 | 2 | 2 | 1 | 2 | 2 | 3 | 2 |
| Olfactory Epithelium, Inflammation                        |   |   |   |   |   |   |   |   |   |   |
| Olfactory Epithelium, Squamous, Hyperplasia               |   |   |   |   |   |   |   |   |   |   |

Key : X=Not Remarkable N=No Section I=Incomplete A=Autolysis  
 1=minimal 2=slight/mild 3=moderate 4=moderately severe 5=severe/high  
 P=Present B=Benign M=Malignant  
 m=missing one paired organ u=unscheduled sac./death





# HISTOPATHOLOGY INCIDENCE TABLE

GROUP  
30ppm

09001  
90-Day Sacrifice  
Male Rat

A  
N  
I  
M  
A  
L

|                                                           | 2 | 2 | 2 | 2 | 2 | 2 | 2 | 2 | 2 | 2 |
|-----------------------------------------------------------|---|---|---|---|---|---|---|---|---|---|
|                                                           | 4 | 4 | 4 | 4 | 4 | 4 | 4 | 4 | 4 | 5 |
|                                                           | 1 | 2 | 3 | 4 | 5 | 6 | 7 | 8 | 9 | 0 |
| Nose, Level 1                                             | X | X |   | X |   |   | X | X | X |   |
| Transitional/Respiratory Epithelium, Hyperplasia          |   |   |   |   |   |   |   |   |   |   |
| Transitional/Respiratory Epithelium, Inflammation         |   |   | 1 |   | 1 | 1 |   |   |   | 1 |
| Transitional/Respiratory Epithelium, Squamous, Metaplasia |   |   |   |   |   |   |   |   |   |   |
| Nose, Level 2                                             |   |   |   |   |   |   |   |   |   |   |
| Olfactory Epithelium, Basal Cell, Hyperplasia             | 2 | 2 | 2 | 2 | 1 | 2 | 2 | 1 | 2 | 1 |
| Olfactory Epithelium, Degeneration/Necrosis               | 2 | 2 | 2 | 2 | 1 | 2 | 2 | 1 | 2 | 1 |
| Olfactory Epithelium, Inflammation                        | 1 |   |   |   |   |   |   |   |   |   |
| Transitional/Respiratory Epithelium, Hyperplasia          | 1 | 2 | 2 | 2 | 1 | 1 | 1 | 2 | 1 | 1 |
| Transitional/Respiratory Epithelium, Inflammation         |   |   |   |   |   |   |   |   |   |   |
| Transitional/Respiratory Epithelium, Squamous, Metaplasia |   |   | 1 | 1 | 1 | 1 | 1 | 1 | 1 | 1 |
| Nose, Level 3                                             |   |   |   |   |   |   |   |   |   |   |
| Olfactory Epithelium, Basal Cell, Hyperplasia             | 2 | 2 | 1 | 2 | 2 | 2 | 2 | 2 | 2 | 2 |
| Olfactory Epithelium, Degeneration/Necrosis               | 2 | 2 | 3 | 2 | 2 | 2 | 3 | 2 | 2 | 3 |
| Nose, Level 4                                             |   |   |   |   |   |   |   |   |   |   |
| Olfactory Epithelium, Basal Cell, Hyperplasia             | 2 | 2 | 3 | 2 | 2 | 2 | 2 | 2 | 2 | 2 |
| Olfactory Epithelium, Degeneration/Necrosis               | 2 | 2 | 3 | 3 | 2 | 3 | 3 | 3 | 3 | 3 |
| Olfactory Epithelium, Inflammation                        |   |   |   |   |   |   | 1 |   |   |   |
| Olfactory Epithelium, Squamous, Hyperplasia               |   |   |   |   |   |   |   |   | 2 |   |

Key : X=Not Remarkable N=No Section I=Incomplete A=Autolysis  
 1=minimal 2=slight/mild 3=moderate 4=moderately severe 5=severe/high  
 P=Present B=Benign M=Malignant  
 m=missing one paired organ u=unscheduled sac./death

## HISTOPATHOLOGY INCIDENCE TABLE

GROUP  
30ppm

09001  
90-Day Sacrifice  
Male Rat

A  
N  
I  
M  
A  
L

|                                                           | 2 | 2 | 2 | 2 | 2 | 2 | 2 | 2 | 2 | 2 |
|-----------------------------------------------------------|---|---|---|---|---|---|---|---|---|---|
|                                                           | 4 | 4 | 4 | 4 | 4 | 4 | 4 | 4 | 4 | 5 |
|                                                           | 1 | 2 | 3 | 4 | 5 | 6 | 7 | 8 | 9 | 0 |
| Nose, Level 5                                             |   |   |   |   |   |   |   |   |   |   |
| Nasopharyngeal Duct, Goblet Cell, Hypertrophy/Hyperplasia | 1 |   | 1 |   |   |   |   | 1 | 1 | 1 |
| Olfactory Epithelium, Basal Cell, Hyperplasia             | 2 | 2 | 2 | 2 | 2 | 2 | 2 | 2 | 2 | 2 |
| Olfactory Epithelium, Degeneration/Necrosis               | 2 | 2 | 2 | 2 | 1 | 1 | 2 | 2 | 2 | 2 |
| Olfactory Epithelium, Squamous, Metaplasia                | 1 |   |   |   |   |   |   |   |   |   |
| Nose, Tip                                                 | X | X | X |   |   |   | X | X | X |   |
| Squamous Epithelium, Hyperplasia                          |   |   |   |   |   |   |   |   |   |   |
| Squamous Epithelium, Inflammation                         |   |   |   | 1 | 1 | 1 |   |   |   | 1 |
|                                                           |   |   |   |   |   |   |   |   |   |   |
|                                                           |   |   |   |   |   |   |   |   |   |   |
|                                                           |   |   |   |   |   |   |   |   |   |   |
|                                                           |   |   |   |   |   |   |   |   |   |   |
|                                                           |   |   |   |   |   |   |   |   |   |   |
|                                                           |   |   |   |   |   |   |   |   |   |   |
|                                                           |   |   |   |   |   |   |   |   |   |   |
|                                                           |   |   |   |   |   |   |   |   |   |   |
|                                                           |   |   |   |   |   |   |   |   |   |   |
|                                                           |   |   |   |   |   |   |   |   |   |   |
|                                                           |   |   |   |   |   |   |   |   |   |   |
|                                                           |   |   |   |   |   |   |   |   |   |   |
|                                                           |   |   |   |   |   |   |   |   |   |   |
|                                                           |   |   |   |   |   |   |   |   |   |   |
|                                                           |   |   |   |   |   |   |   |   |   |   |
|                                                           |   |   |   |   |   |   |   |   |   |   |
|                                                           |   |   |   |   |   |   |   |   |   |   |
|                                                           |   |   |   |   |   |   |   |   |   |   |
|                                                           |   |   |   |   |   |   |   |   |   |   |
|                                                           |   |   |   |   |   |   |   |   |   |   |
|                                                           |   |   |   |   |   |   |   |   |   |   |
|                                                           |   |   |   |   |   |   |   |   |   |   |
|                                                           |   |   |   |   |   |   |   |   |   |   |
|                                                           |   |   |   |   |   |   |   |   |   |   |

Key :X=Not Remarkable N=No Section I=Incomplete A=Autolysis  
 1=minimal 2=slight/mild 3=moderate 4=moderately severe 5=severe/high  
 P=Present B=Benign M=Malignant  
 m=missing one paired organ u=unscheduled sac./death

# HISTOPATHOLOGY INCIDENCE TABLE

GROUP  
0ppm

09001  
90-Day Sacrifice  
Female Rat

A  
N  
I  
M  
A  
L

|                                                           | 3 | 3 | 3 | 3 | 3 | 3 | 3 | 3 | 3 | 3 |
|-----------------------------------------------------------|---|---|---|---|---|---|---|---|---|---|
|                                                           | 0 | 0 | 0 | 0 | 0 | 0 | 0 | 0 | 0 | 1 |
|                                                           | 1 | 2 | 3 | 4 | 5 | 6 | 7 | 8 | 9 | 0 |
| Nose, Level 1                                             |   |   |   |   |   |   |   |   |   | X |
| Transitional/Respiratory Epithelium, Hyperplasia          |   |   |   |   |   |   |   |   |   |   |
| Transitional/Respiratory Epithelium, Inflammation         | 2 | 2 | 3 | 2 | 2 | 3 | 2 | 1 | 2 |   |
| Transitional/Respiratory Epithelium, Squamous, Metaplasia |   |   |   |   |   |   |   |   |   |   |
| Nose, Level 2                                             | X | X | X | X | X | X | X | X | X | X |
| Olfactory Epithelium, Basal Cell, Hyperplasia             |   |   |   |   |   |   |   |   |   |   |
| Olfactory Epithelium, Degeneration/Necrosis               |   |   |   |   |   |   |   |   |   |   |
| Olfactory Epithelium, Inflammation                        |   |   |   |   |   |   |   |   |   |   |
| Transitional/Respiratory Epithelium, Hyperplasia          |   |   |   |   |   |   |   |   |   |   |
| Transitional/Respiratory Epithelium, Inflammation         |   |   |   |   |   |   |   |   |   |   |
| Transitional/Respiratory Epithelium, Squamous, Metaplasia |   |   |   |   |   |   |   |   |   |   |
| Nose, Level 3                                             | X | X | X | X | X | X | X | X | X | X |
| Olfactory Epithelium, Basal Cell, Hyperplasia             |   |   |   |   |   |   |   |   |   |   |
| Olfactory Epithelium, Degeneration/Necrosis               |   |   |   |   |   |   |   |   |   |   |
| Nose, Level 4                                             | X | X | X | X | X | X | X | X | X | X |
| Olfactory Epithelium, Basal Cell, Hyperplasia             |   |   |   |   |   |   |   |   |   |   |
| Olfactory Epithelium, Degeneration/Necrosis               |   |   |   |   |   |   |   |   |   |   |
| Olfactory Epithelium, Inflammation                        |   |   |   |   |   |   |   |   |   |   |
| Olfactory Epithelium, Squamous, Hyperplasia               |   |   |   |   |   |   |   |   |   |   |

Key : X-Not Remarkable N-No Section I-Incomplete A-Autolysis  
 1-minimal 2-slight/mild 3-moderate 4-moderately severe 5-severe/high  
 P-Present B-Benign M-Malignant  
 m-missing one paired organ u-unscheduled sac./death

# HISTOPATHOLOGY INCIDENCE TABLE

GROUP  
0ppm

09001  
90-Day Sacrifice  
Female Rat

A  
N  
I  
M  
A  
L

|                                                           | 3<br>0<br>1 | 3<br>0<br>2 | 3<br>0<br>3 | 3<br>0<br>4 | 3<br>0<br>5 | 3<br>0<br>6 | 3<br>0<br>7 | 3<br>0<br>8 | 3<br>0<br>9 | 3<br>1<br>0 |
|-----------------------------------------------------------|-------------|-------------|-------------|-------------|-------------|-------------|-------------|-------------|-------------|-------------|
| Nose, Level 5                                             | X           | X           | X           | X           | X           | X           | X           | X           | X           | X           |
| Nasopharyngeal Duct, Goblet Cell, Hypertrophy/Hyperplasia |             |             |             |             |             |             |             |             |             |             |
| Olfactory Epithelium, Basal Cell, Hyperplasia             |             |             |             |             |             |             |             |             |             |             |
| Olfactory Epithelium, Degeneration/Necrosis               |             |             |             |             |             |             |             |             |             |             |
| Olfactory Epithelium, Squamous, Metaplasia                |             |             |             |             |             |             |             |             |             |             |
| Nose, Tip                                                 |             |             |             |             |             |             |             |             |             |             |
| Squamous Epithelium, Hyperplasia                          |             |             |             |             |             |             |             |             |             |             |
| Squamous Epithelium, Inflammation                         | 2           | 1           | 3           | 2           | 3           | 2           | 2           | 1           | 2           | 1           |

Key: X=Not Remarkable N=No Section I=Incomplete A=Autolysis  
1=Minimal 2=slight/mild 3=moderate 4=moderately severe 5=severe/high  
P=Present B=Benign M=Malignant  
m=missing one paired organ u=unscheduled sac./death

# HISTOPATHOLOGY INCIDENCE TABLE

GROUP  
0.1ppm

09001  
90-Day Sacrifice  
Female Rat

ANIMAL

|                                                           | 1 | 2 | 3 | 4 | 5 | 6 | 7 | 8 | 9 | 10 | 11 | 12 | 13 | 14 | 15 | 16 | 17 | 18 | 19 | 20 |
|-----------------------------------------------------------|---|---|---|---|---|---|---|---|---|----|----|----|----|----|----|----|----|----|----|----|
|                                                           | 3 | 3 | 3 | 3 | 3 | 3 | 3 | 3 | 3 | 3  | 3  | 3  | 3  | 3  | 3  |    |    |    |    |    |
|                                                           | 3 | 3 | 3 | 3 | 4 | 4 | 4 | 4 | 4 | 4  | 4  | 4  | 4  | 4  | 4  |    |    |    |    |    |
|                                                           | 6 | 7 | 8 | 9 | 0 | 1 | 2 | 3 | 4 | 5  |    |    |    |    |    |    |    |    |    |    |
| Nose, Level 1                                             |   |   | X |   |   |   |   |   |   |    |    |    |    |    | X  |    |    |    |    |    |
| Transitional/Respiratory Epithelium, Hyperplasia          |   |   |   |   |   |   |   |   |   |    |    |    |    |    |    |    |    |    |    |    |
| Transitional/Respiratory Epithelium, Inflammation         | 1 | 2 |   | 3 | 2 | 1 | 2 | 1 | 2 |    |    |    |    |    |    |    |    |    |    |    |
| Transitional/Respiratory Epithelium, Squamous, Metaplasia |   |   |   |   |   |   |   |   |   |    |    |    |    |    |    |    |    |    |    |    |
| Nose, Level 2                                             | X | X | X | X | X | X | X | X | X | X  | X  | X  | X  | X  |    |    |    |    |    |    |
| Olfactory Epithelium, Basal Cell, Hyperplasia             |   |   |   |   |   |   |   |   |   |    |    |    |    |    |    |    |    |    |    |    |
| Olfactory Epithelium, Degeneration/Necrosis               |   |   |   |   |   |   |   |   |   |    |    |    |    |    |    |    |    |    |    |    |
| Olfactory Epithelium, Inflammation                        |   |   |   |   |   |   |   |   |   |    |    |    |    |    |    |    |    |    |    |    |
| Transitional/Respiratory Epithelium, Hyperplasia          |   |   |   |   |   |   |   |   |   |    |    |    |    |    |    |    |    |    |    |    |
| Transitional/Respiratory Epithelium, Inflammation         |   |   |   |   |   |   |   |   |   |    |    |    |    |    |    |    |    |    |    |    |
| Transitional/Respiratory Epithelium, Squamous, Metaplasia |   |   |   |   |   |   |   |   |   |    |    |    |    |    |    |    |    |    |    |    |
| Nose, Level 3                                             | X | X | X | X | X | X | X | X | X | X  | X  | X  | X  | X  |    |    |    |    |    |    |
| Olfactory Epithelium, Basal Cell, Hyperplasia             |   |   |   |   |   |   |   |   |   |    |    |    |    |    |    |    |    |    |    |    |
| Olfactory Epithelium, Degeneration/Necrosis               |   |   |   |   |   |   |   |   |   |    |    |    |    |    |    |    |    |    |    |    |
| Nose, Level 4                                             | X | X | X | X | X | X | X | X | X | X  | X  | X  | X  | X  |    |    |    |    |    |    |
| Olfactory Epithelium, Basal Cell, Hyperplasia             |   |   |   |   |   |   |   |   |   |    |    |    |    |    |    |    |    |    |    |    |
| Olfactory Epithelium, Degeneration/Necrosis               |   |   |   |   |   |   |   |   |   |    |    |    |    |    |    |    |    |    |    |    |
| Olfactory Epithelium, Inflammation                        |   |   |   |   |   |   |   |   |   |    |    |    |    |    |    |    |    |    |    |    |
| Olfactory Epithelium, Squamous, Hyperplasia               |   |   |   |   |   |   |   |   |   |    |    |    |    |    |    |    |    |    |    |    |

Key : X=Not Remarkable N=No Section I=Incomplete A=Autolysis  
 1=minimal 2=slight/mild 3=moderate 4=moderately severe 5=severe/high  
 P=Present B=Benign M=Malignant  
 m=missing one paired organ u=unscheduled sac./death

### HISTOPATHOLOGY INCIDENCE TABLE

GROUP  
0.1ppm

09001  
90-Day Sacrifice  
Female Rat

ANIMAL

|                                                              | 3 | 3 | 3 | 3 | 3 | 3 | 3 | 3 | 3 | 3 | 3 |  |  |  |  |  |  |  |  |  |
|--------------------------------------------------------------|---|---|---|---|---|---|---|---|---|---|---|--|--|--|--|--|--|--|--|--|
|                                                              | 3 | 3 | 3 | 3 | 4 | 4 | 4 | 4 | 4 | 4 | 4 |  |  |  |  |  |  |  |  |  |
|                                                              | 6 | 7 | 8 | 9 | 0 | 1 | 2 | 3 | 4 | 5 |   |  |  |  |  |  |  |  |  |  |
| Nose, Level 5                                                | X | X | X | X | X | X | X | X | X | X |   |  |  |  |  |  |  |  |  |  |
| Nasopharyngeal Duct, Goblet<br>Cell, Hypertrophy/Hyperplasia |   |   |   |   |   |   |   |   |   |   |   |  |  |  |  |  |  |  |  |  |
| Olfactory Epithelium, Basal<br>Cell, Hyperplasia             |   |   |   |   |   |   |   |   |   |   |   |  |  |  |  |  |  |  |  |  |
| Olfactory Epithelium,<br>Degeneration/Necrosis               |   |   |   |   |   |   |   |   |   |   |   |  |  |  |  |  |  |  |  |  |
| Olfactory Epithelium,<br>Squamous, Metaplasia                |   |   |   |   |   |   |   |   |   |   |   |  |  |  |  |  |  |  |  |  |
| Nose, Tip                                                    |   |   | X |   |   |   |   |   |   |   |   |  |  |  |  |  |  |  |  |  |
| Squamous Epithelium,<br>Hyperplasia                          |   |   |   |   |   |   |   |   |   |   |   |  |  |  |  |  |  |  |  |  |
| Squamous Epithelium,<br>Inflammation                         | 1 | 2 |   | 2 | 2 | 2 | 2 | 2 | 2 | 2 | 1 |  |  |  |  |  |  |  |  |  |
|                                                              |   |   |   |   |   |   |   |   |   |   |   |  |  |  |  |  |  |  |  |  |
|                                                              |   |   |   |   |   |   |   |   |   |   |   |  |  |  |  |  |  |  |  |  |
|                                                              |   |   |   |   |   |   |   |   |   |   |   |  |  |  |  |  |  |  |  |  |
|                                                              |   |   |   |   |   |   |   |   |   |   |   |  |  |  |  |  |  |  |  |  |
|                                                              |   |   |   |   |   |   |   |   |   |   |   |  |  |  |  |  |  |  |  |  |
|                                                              |   |   |   |   |   |   |   |   |   |   |   |  |  |  |  |  |  |  |  |  |
|                                                              |   |   |   |   |   |   |   |   |   |   |   |  |  |  |  |  |  |  |  |  |
|                                                              |   |   |   |   |   |   |   |   |   |   |   |  |  |  |  |  |  |  |  |  |
|                                                              |   |   |   |   |   |   |   |   |   |   |   |  |  |  |  |  |  |  |  |  |
|                                                              |   |   |   |   |   |   |   |   |   |   |   |  |  |  |  |  |  |  |  |  |
|                                                              |   |   |   |   |   |   |   |   |   |   |   |  |  |  |  |  |  |  |  |  |
|                                                              |   |   |   |   |   |   |   |   |   |   |   |  |  |  |  |  |  |  |  |  |
|                                                              |   |   |   |   |   |   |   |   |   |   |   |  |  |  |  |  |  |  |  |  |
|                                                              |   |   |   |   |   |   |   |   |   |   |   |  |  |  |  |  |  |  |  |  |
|                                                              |   |   |   |   |   |   |   |   |   |   |   |  |  |  |  |  |  |  |  |  |
|                                                              |   |   |   |   |   |   |   |   |   |   |   |  |  |  |  |  |  |  |  |  |
|                                                              |   |   |   |   |   |   |   |   |   |   |   |  |  |  |  |  |  |  |  |  |
|                                                              |   |   |   |   |   |   |   |   |   |   |   |  |  |  |  |  |  |  |  |  |

Key :X-Not Remarkable N-No Section I-Incomplete A-Autolysis  
 1-minimal 2-slight/mild 3-moderate 4-moderately severe 5-severe/high  
 P-Present B-Benign M-Malignant  
 m=missing one paired organ u=unscheduled sac./death

### HISTOPATHOLOGY INCIDENCE TABLE

GROUP  
1.0ppm

09001  
90-Day Sacrifice  
Female Rat

A  
N  
I  
M  
A  
L

|                                                           | 3 | 3 | 3 | 3 | 3 | 3 | 3 | 3 | 3 | 3 | 3 | 3 | 3 | 3 | 3 | 3 | 3 | 3 | 3 | 3 |
|-----------------------------------------------------------|---|---|---|---|---|---|---|---|---|---|---|---|---|---|---|---|---|---|---|---|
|                                                           | 7 | 7 | 7 | 7 | 7 | 7 | 7 | 7 | 7 | 7 | 7 | 7 | 7 | 7 | 7 | 7 | 7 | 7 | 7 | 7 |
|                                                           | 1 | 2 | 3 | 4 | 5 | 6 | 7 | 8 | 9 | 0 |   |   |   |   |   |   |   |   |   |   |
| Nose, Level 1                                             |   |   |   |   | X |   | X |   |   |   |   |   |   |   |   |   |   |   |   |   |
| Transitional/Respiratory Epithelium, Hyperplasia          |   |   |   |   |   |   |   |   |   |   |   |   |   |   |   |   |   |   |   |   |
| Transitional/Respiratory Epithelium, Inflammation         | 3 | 1 | 3 | 1 |   | 2 |   | 2 | 1 | 1 |   |   |   |   |   |   |   |   |   |   |
| Transitional/Respiratory Epithelium, Squamous, Metaplasia |   |   |   |   |   |   |   |   |   |   |   |   |   |   |   |   |   |   |   |   |
| Nose, Level 2                                             |   |   |   |   |   |   |   |   |   |   |   |   |   |   |   |   |   |   |   |   |
| Olfactory Epithelium, Basal Cell, Hyperplasia             |   |   |   |   |   |   |   |   |   |   |   |   |   |   |   |   |   |   |   |   |
| Olfactory Epithelium, Degeneration/Necrosis               |   |   |   |   |   |   |   |   |   |   |   |   |   |   |   |   |   |   |   |   |
| Olfactory Epithelium, Inflammation                        |   |   |   |   |   |   |   |   |   |   |   |   |   |   |   |   |   |   |   |   |
| Transitional/Respiratory Epithelium, Hyperplasia          | 1 | 1 | 1 | 1 | 1 | 1 | 1 | 1 | 1 | 1 |   |   |   |   |   |   |   |   |   |   |
| Transitional/Respiratory Epithelium, Inflammation         |   |   |   |   |   |   |   |   |   |   |   |   |   |   |   |   |   |   |   |   |
| Transitional/Respiratory Epithelium, Squamous, Metaplasia |   |   |   |   |   |   |   |   |   |   |   |   |   |   |   |   |   |   |   |   |
| Nose, Level 3                                             | X | X | X | X | X | X | X | X | X | X |   |   |   |   |   |   |   |   |   |   |
| Olfactory Epithelium, Basal Cell, Hyperplasia             |   |   |   |   |   |   |   |   |   |   |   |   |   |   |   |   |   |   |   |   |
| Olfactory Epithelium, Degeneration/Necrosis               |   |   |   |   |   |   |   |   |   |   |   |   |   |   |   |   |   |   |   |   |
| Nose, Level 4                                             | X | X | X | X | X | X | X | X | X | X |   |   |   |   |   |   |   |   |   |   |
| Olfactory Epithelium, Basal Cell, Hyperplasia             |   |   |   |   |   |   |   |   |   |   |   |   |   |   |   |   |   |   |   |   |
| Olfactory Epithelium, Degeneration/Necrosis               |   |   |   |   |   |   |   |   |   |   |   |   |   |   |   |   |   |   |   |   |
| Olfactory Epithelium, Inflammation                        |   |   |   |   |   |   |   |   |   |   |   |   |   |   |   |   |   |   |   |   |
| Olfactory Epithelium, Squamous, Hyperplasia               |   |   |   |   |   |   |   |   |   |   |   |   |   |   |   |   |   |   |   |   |

Key : X=Not Remarkable N=No Section I=Incomplete A=Autolysis  
1=minimal 2=slight/mild 3=moderate 4=moderately severe 5=severe/high  
P=Present B=Benign M=Malignant  
m=missing one paired organ u=unscheduled sac./death





## HISTOPATHOLOGY INCIDENCE TABLE

GROUP  
10ppm

09001  
90-Day Sacrifice  
Female Rat

A  
N  
I  
M  
A  
L

|                                                           | 4 | 4 | 4 | 4 | 4 | 4 | 4 | 4 | 4 | 4 |
|-----------------------------------------------------------|---|---|---|---|---|---|---|---|---|---|
|                                                           | 0 | 0 | 0 | 0 | 1 | 1 | 1 | 1 | 1 | 1 |
|                                                           | 6 | 7 | 8 | 9 | 0 | 1 | 2 | 3 | 4 | 5 |
| <b>Nose, Level 1</b>                                      |   |   | X | N | X |   |   | X |   |   |
| Transitional/Respiratory Epithelium, Hyperplasia          |   |   |   |   |   |   |   |   |   |   |
| Transitional/Respiratory Epithelium, Inflammation         | 2 | 2 |   |   |   | 2 | 2 |   | 2 | 1 |
| Transitional/Respiratory Epithelium, Squamous, Metaplasia |   |   |   |   |   |   |   |   |   |   |
| <b>Nose, Level 2</b>                                      |   |   |   |   |   |   |   |   |   |   |
| Olfactory Epithelium, Basal Cell, Hyperplasia             | 2 | 2 | 2 | 1 | 2 | 2 | 2 | 2 | 2 | 2 |
| Olfactory Epithelium, Degeneration/Necrosis               | 2 | 2 | 2 | 1 | 2 | 2 | 2 | 2 | 2 | 2 |
| Olfactory Epithelium, Inflammation                        |   |   |   |   |   |   |   |   |   |   |
| Transitional/Respiratory Epithelium, Hyperplasia          | 2 | 2 | 2 | 2 | 2 | 2 | 1 | 1 | 2 |   |
| Transitional/Respiratory Epithelium, Inflammation         |   |   |   |   |   |   |   |   |   |   |
| Transitional/Respiratory Epithelium, Squamous, Metaplasia | 1 | 1 | 1 | 1 | 1 | 1 | 1 | 1 | 1 |   |
| <b>Nose, Level 3</b>                                      |   |   |   |   |   |   |   |   |   |   |
| Olfactory Epithelium, Basal Cell, Hyperplasia             | 1 | 2 | 1 | 1 | 1 | 1 | 1 | 2 | 2 | 2 |
| Olfactory Epithelium, Degeneration/Necrosis               | 1 | 2 | 1 | 2 | 2 | 2 | 1 | 2 | 2 | 2 |
| <b>Nose, Level 4</b>                                      |   |   |   |   |   |   |   |   |   |   |
| Olfactory Epithelium, Basal Cell, Hyperplasia             | 2 | 2 | 2 | 2 | 2 | 2 | 2 | 2 | 2 | 1 |
| Olfactory Epithelium, Degeneration/Necrosis               | 2 | 2 | 2 | 3 | 3 | 2 | 2 | 2 | 3 | 2 |
| Olfactory Epithelium, Inflammation                        |   |   |   |   |   |   |   |   |   |   |
| Olfactory Epithelium, Squamous, Hyperplasia               |   |   |   |   |   |   |   |   |   |   |

Key : X=Not Remarkable N=No Section I=Incomplete A=Autolysis  
 1=minimal 2=slight/mild 3=moderate 4=moderately severe 5=severe/high  
 P=Present B=Benign M=Malignant  
 m=missing one paired organ u=unscheduled sac./death

HISTOPATHOLOGY INCIDENCE TABLE

GROUP  
10ppm

09001  
90-Day Sacrifice  
Female Rat

A  
N  
I  
M  
A  
L

|                                                           | 1 | 2 | 3 | 4 | 5 | 6 | 7 | 8 | 9 | 10 | 11 | 12 | 13 | 14 | 15 | 16 | 17 | 18 | 19 | 20 |
|-----------------------------------------------------------|---|---|---|---|---|---|---|---|---|----|----|----|----|----|----|----|----|----|----|----|
|                                                           | 4 | 4 | 4 | 4 | 4 | 4 | 4 | 4 | 4 | 4  | 4  | 4  | 4  | 4  | 4  |    |    |    |    |    |
|                                                           | 0 | 0 | 0 | 0 | 1 | 1 | 1 | 1 | 1 | 1  | 1  | 1  | 1  | 1  | 1  |    |    |    |    |    |
|                                                           | 6 | 7 | 8 | 9 | 0 | 1 | 2 | 3 | 4 | 5  |    |    |    |    |    |    |    |    |    |    |
| Nose, Level 5                                             |   |   |   | X |   |   |   |   |   |    |    |    |    |    |    |    |    |    |    |    |
| Nasopharyngeal Duct, Goblet Cell, Hypertrophy/Hyperplasia | 1 |   |   |   | 1 | 1 | 1 |   | 1 |    |    |    |    |    |    |    |    |    |    |    |
| Olfactory Epithelium, Basal Cell, Hyperplasia             | 2 | 1 |   | 1 | 1 | 1 | 2 | 1 | 2 | 1  |    |    |    |    |    |    |    |    |    |    |
| Olfactory Epithelium, Degeneration/Necrosis               | 2 | 1 |   | 2 | 3 | 1 | 1 | 1 | 3 | 1  |    |    |    |    |    |    |    |    |    |    |
| Olfactory Epithelium, Squamous, Metaplasia                |   |   |   |   |   |   |   |   |   |    |    |    |    |    |    |    |    |    |    |    |
| Nose, Tip                                                 |   |   |   | X | N | X |   |   |   |    |    |    |    |    |    |    |    |    |    |    |
| Squamous Epithelium, Hyperplasia                          |   |   |   |   |   |   |   |   |   |    |    |    |    |    |    |    |    |    |    |    |
| Squamous Epithelium, Inflammation                         | 2 | 1 |   |   |   | 1 | 2 | 1 | 2 | 1  |    |    |    |    |    |    |    |    |    |    |
|                                                           |   |   |   |   |   |   |   |   |   |    |    |    |    |    |    |    |    |    |    |    |
|                                                           |   |   |   |   |   |   |   |   |   |    |    |    |    |    |    |    |    |    |    |    |
|                                                           |   |   |   |   |   |   |   |   |   |    |    |    |    |    |    |    |    |    |    |    |
|                                                           |   |   |   |   |   |   |   |   |   |    |    |    |    |    |    |    |    |    |    |    |
|                                                           |   |   |   |   |   |   |   |   |   |    |    |    |    |    |    |    |    |    |    |    |
|                                                           |   |   |   |   |   |   |   |   |   |    |    |    |    |    |    |    |    |    |    |    |
|                                                           |   |   |   |   |   |   |   |   |   |    |    |    |    |    |    |    |    |    |    |    |
|                                                           |   |   |   |   |   |   |   |   |   |    |    |    |    |    |    |    |    |    |    |    |
|                                                           |   |   |   |   |   |   |   |   |   |    |    |    |    |    |    |    |    |    |    |    |
|                                                           |   |   |   |   |   |   |   |   |   |    |    |    |    |    |    |    |    |    |    |    |
|                                                           |   |   |   |   |   |   |   |   |   |    |    |    |    |    |    |    |    |    |    |    |
|                                                           |   |   |   |   |   |   |   |   |   |    |    |    |    |    |    |    |    |    |    |    |
|                                                           |   |   |   |   |   |   |   |   |   |    |    |    |    |    |    |    |    |    |    |    |

Key : X=Not Remarkable N=No Section I=Incomplete A=Autolysis  
 1=minimal 2=slight/mild 3=moderate 4=moderately severe 5=severe/high  
 P=Present B=Benign M=Malignant  
 m=missing one paired organ u=unscheduled sac./death

## HISTOPATHOLOGY INCIDENCE TABLE

GROUP  
30ppm

09001  
90-Day Sacrifice  
Female Rat

A  
N  
I  
M  
A  
L

|                                                           | 4 | 4 | 4 | 4 | 4 | 4 | 4 | 4 | 4 | 4 |   |  |  |  |  |  |  |  |  |  |
|-----------------------------------------------------------|---|---|---|---|---|---|---|---|---|---|---|--|--|--|--|--|--|--|--|--|
|                                                           | 4 | 4 | 4 | 4 | 4 | 4 | 4 | 4 | 4 | 4 | 5 |  |  |  |  |  |  |  |  |  |
|                                                           | 1 | 2 | 3 | 4 | 5 | 6 | 7 | 8 | 9 | 0 |   |  |  |  |  |  |  |  |  |  |
| Nose, Level 1                                             |   | X |   |   | X |   |   |   |   |   |   |  |  |  |  |  |  |  |  |  |
| Transitional/Respiratory Epithelium, Hyperplasia          |   |   |   |   |   |   |   |   |   |   |   |  |  |  |  |  |  |  |  |  |
| Transitional/Respiratory Epithelium, Inflammation         | 2 |   | 2 | 1 |   | 2 | 1 | 1 | 3 | 2 |   |  |  |  |  |  |  |  |  |  |
| Transitional/Respiratory Epithelium, Squamous, Metaplasia |   |   |   |   |   |   |   |   |   |   |   |  |  |  |  |  |  |  |  |  |
| Nose, Level 2                                             |   |   |   |   |   |   |   |   |   |   |   |  |  |  |  |  |  |  |  |  |
| Olfactory Epithelium, Basal Cell, Hyperplasia             | 3 | 3 | 2 | 3 | 2 | 2 | 3 | 2 | 2 | 3 |   |  |  |  |  |  |  |  |  |  |
| Olfactory Epithelium, Degeneration/Necrosis               | 2 | 2 | 2 | 2 | 2 | 2 | 2 | 2 | 2 | 2 |   |  |  |  |  |  |  |  |  |  |
| Olfactory Epithelium, Inflammation                        |   |   |   |   |   |   |   |   |   |   |   |  |  |  |  |  |  |  |  |  |
| Transitional/Respiratory Epithelium, Hyperplasia          | 2 | 2 | 2 | 2 | 1 | 1 | 2 | 2 |   | 1 |   |  |  |  |  |  |  |  |  |  |
| Transitional/Respiratory Epithelium, Inflammation         |   |   |   |   |   |   |   |   |   |   |   |  |  |  |  |  |  |  |  |  |
| Transitional/Respiratory Epithelium, Squamous, Metaplasia | 1 | 1 | 1 | 1 | 1 |   | 1 | 1 |   | 1 |   |  |  |  |  |  |  |  |  |  |
| Nose, Level 3                                             |   |   |   |   |   |   |   |   |   |   |   |  |  |  |  |  |  |  |  |  |
| Olfactory Epithelium, Basal Cell, Hyperplasia             | 2 | 2 | 2 | 2 | 2 | 2 | 2 | 2 | 2 | 2 |   |  |  |  |  |  |  |  |  |  |
| Olfactory Epithelium, Degeneration/Necrosis               | 2 | 2 | 2 | 2 | 2 | 2 | 2 | 2 | 2 | 2 |   |  |  |  |  |  |  |  |  |  |
| Nose, Level 4                                             |   |   |   |   |   |   |   |   |   |   |   |  |  |  |  |  |  |  |  |  |
| Olfactory Epithelium, Basal Cell, Hyperplasia             | 2 | 2 | 2 | 2 | 2 | 2 | 2 | 2 | 2 | 2 |   |  |  |  |  |  |  |  |  |  |
| Olfactory Epithelium, Degeneration/Necrosis               | 2 | 3 | 2 | 2 | 2 | 2 | 2 | 2 | 2 | 3 |   |  |  |  |  |  |  |  |  |  |
| Olfactory Epithelium, Inflammation                        |   |   |   |   |   |   |   |   |   |   |   |  |  |  |  |  |  |  |  |  |
| Olfactory Epithelium, Squamous, Hyperplasia               |   |   |   |   |   |   |   |   |   |   |   |  |  |  |  |  |  |  |  |  |

Key : X-Not Remarkable N-No Section I-Incomplete A-Autolysis  
 1=Minimal 2=slight/mild 3=moderate 4=moderately severe 5=severe/high  
 P=Present B=Benign M=Malignant  
 m=missing one paired organ u=unscheduled sac./death

**HISTOPATHOLOGY INCIDENCE TABLE**

GROUP  
30ppm

09001  
90-Day Sacrifice  
Female Rat

A  
N  
I  
M  
A  
L

|                                                           | 4 | 4 | 4 | 4 | 4 | 4 | 4 | 4 | 4 | 4 |  |  |  |  |  |  |  |  |  |
|-----------------------------------------------------------|---|---|---|---|---|---|---|---|---|---|--|--|--|--|--|--|--|--|--|
|                                                           | 4 | 4 | 4 | 4 | 4 | 4 | 4 | 4 | 4 | 4 |  |  |  |  |  |  |  |  |  |
|                                                           | 1 | 2 | 3 | 4 | 5 | 6 | 7 | 8 | 9 | 0 |  |  |  |  |  |  |  |  |  |
| Nose, Level 5                                             |   |   |   |   |   |   |   |   |   |   |  |  |  |  |  |  |  |  |  |
| Nasopharyngeal Duct, Goblet Cell, Hypertrophy/Hyperplasia | 1 | 1 | 1 | 1 |   |   | 1 |   | 1 | 1 |  |  |  |  |  |  |  |  |  |
| Olfactory Epithelium, Basal Cell, Hyperplasia             | 2 | 2 | 2 | 2 | 2 | 1 | 2 | 1 | 2 | 2 |  |  |  |  |  |  |  |  |  |
| Olfactory Epithelium, Degeneration/Necrosis               | 1 | 2 | 2 | 2 | 2 | 1 | 2 | 1 | 2 | 2 |  |  |  |  |  |  |  |  |  |
| Olfactory Epithelium, Squamous, Metaplasia                |   |   |   |   |   |   |   |   |   |   |  |  |  |  |  |  |  |  |  |
| Nose, Tip                                                 |   |   |   |   |   |   |   |   |   |   |  |  |  |  |  |  |  |  |  |
| Squamous Epithelium, Hyperplasia                          |   |   |   |   |   |   |   |   |   |   |  |  |  |  |  |  |  |  |  |
| Squamous Epithelium, Inflammation                         | 2 | 1 | 1 | 1 | 1 | 2 | 1 | 1 | 3 | 2 |  |  |  |  |  |  |  |  |  |
|                                                           |   |   |   |   |   |   |   |   |   |   |  |  |  |  |  |  |  |  |  |
|                                                           |   |   |   |   |   |   |   |   |   |   |  |  |  |  |  |  |  |  |  |
|                                                           |   |   |   |   |   |   |   |   |   |   |  |  |  |  |  |  |  |  |  |
|                                                           |   |   |   |   |   |   |   |   |   |   |  |  |  |  |  |  |  |  |  |
|                                                           |   |   |   |   |   |   |   |   |   |   |  |  |  |  |  |  |  |  |  |
|                                                           |   |   |   |   |   |   |   |   |   |   |  |  |  |  |  |  |  |  |  |
|                                                           |   |   |   |   |   |   |   |   |   |   |  |  |  |  |  |  |  |  |  |
|                                                           |   |   |   |   |   |   |   |   |   |   |  |  |  |  |  |  |  |  |  |
|                                                           |   |   |   |   |   |   |   |   |   |   |  |  |  |  |  |  |  |  |  |
|                                                           |   |   |   |   |   |   |   |   |   |   |  |  |  |  |  |  |  |  |  |
|                                                           |   |   |   |   |   |   |   |   |   |   |  |  |  |  |  |  |  |  |  |
|                                                           |   |   |   |   |   |   |   |   |   |   |  |  |  |  |  |  |  |  |  |
|                                                           |   |   |   |   |   |   |   |   |   |   |  |  |  |  |  |  |  |  |  |
|                                                           |   |   |   |   |   |   |   |   |   |   |  |  |  |  |  |  |  |  |  |
|                                                           |   |   |   |   |   |   |   |   |   |   |  |  |  |  |  |  |  |  |  |
|                                                           |   |   |   |   |   |   |   |   |   |   |  |  |  |  |  |  |  |  |  |
|                                                           |   |   |   |   |   |   |   |   |   |   |  |  |  |  |  |  |  |  |  |
|                                                           |   |   |   |   |   |   |   |   |   |   |  |  |  |  |  |  |  |  |  |
|                                                           |   |   |   |   |   |   |   |   |   |   |  |  |  |  |  |  |  |  |  |

Key : X=Not Remarkable N=No Section I=Incomplete A=Autolysis  
 1=minimal 2=slight/mild 3=moderate 4=moderately severe 5=severe/high  
 P=Present B=Benign M=Malignant  
 m=missing one paired organ u=unscheduled sac./death

**RECOVERY SACRIFICE**

**PROTOCOL NO. 09001  
EPL PROJECT NO. 304-440**

**SUMMARY INCIDENCE TABLES**  
**Recovery Sacrifice**

## SUMMARY INCIDENCE TABLE

09001

Recovery Sacrifice

Male Rat

|                                                              | GROUP<br>0ppm | GROUP<br>0.1ppm | GROUP<br>1.0ppm | GROUP<br>10ppm | GROUP<br>30ppm |  |
|--------------------------------------------------------------|---------------|-----------------|-----------------|----------------|----------------|--|
| Nose, Level 1 (NO. EXAMINED)                                 | (10)          | (10)            | (10)            | (9)            | (10)           |  |
| Transitional/Respiratory<br>Epithelium, Hyperplasia          | 1             |                 |                 |                |                |  |
| Transitional/Respiratory<br>Epithelium, Inflammation         | 5             | 6               | 6               | 8              | 8              |  |
| Nose, Level 2 (NO. EXAMINED)                                 | (10)          | (10)            | (10)            | (9)            | (10)           |  |
| Olfactory Epithelium, Basal<br>Cell, Hyperplasia             |               |                 |                 | 8              | 8              |  |
| Olfactory Epithelium,<br>Degeneration/Necrosis               |               |                 |                 | 6              | 8              |  |
| Transitional/Respiratory<br>Epithelium, Hyperplasia          |               |                 |                 | 1              |                |  |
| Transitional/Respiratory<br>Epithelium, Inflammation         |               |                 |                 |                |                |  |
| Nose, Level 3 (NO. EXAMINED)                                 | (10)          | (10)            | (10)            | (9)            | (10)           |  |
| Olfactory Epithelium, Basal<br>Cell, Hyperplasia             |               |                 |                 | 7              | 10             |  |
| Olfactory Epithelium,<br>Degeneration/Necrosis               |               |                 |                 | 9              | 10             |  |
| Respiratory Epithelium,<br>Inflammation                      | 2             |                 |                 |                |                |  |
| Nose, Level 4 (NO. EXAMINED)                                 | (10)          | (10)            | (10)            | (9)            | (10)           |  |
| Olfactory Epithelium, Basal<br>Cell, Hyperplasia             |               |                 |                 | 6              | 10             |  |
| Olfactory Epithelium,<br>Degeneration/Necrosis               |               |                 |                 | 8              | 10             |  |
| Olfactory Epithelium,<br>Inflammation                        |               |                 |                 |                | 1              |  |
| Nose, Level 5 (NO. EXAMINED)                                 | (10)          | (10)            | (10)            | (9)            | (10)           |  |
| Nasopharyngeal Duct, Goblet<br>Cell, Hypertrophy/Hyperplasia |               |                 |                 | 1              |                |  |
| Olfactory Epithelium, Basal<br>Cell, Hyperplasia             |               |                 |                 | 2              | 9              |  |
| Olfactory Epithelium,<br>Degeneration/Necrosis               |               |                 |                 |                | 6              |  |
| Nose, Tip (NO. EXAMINED)                                     | (10)          | (10)            | (10)            | (9)            | (10)           |  |
| Squamous Epithelium,<br>Hyperplasia                          | 1             |                 |                 |                |                |  |
| Squamous Epithelium,<br>Inflammation                         | 5             | 4               | 3               | 7              | 4              |  |



## SUMMARY INCIDENCE TABLE

09001

Recovery Sacrifice

Female Rat

|                                                              | GROUP<br>0ppm | GROUP<br>0.1ppm | GROUP<br>1.0ppm | GROUP<br>10ppm | GROUP<br>30ppm |  |
|--------------------------------------------------------------|---------------|-----------------|-----------------|----------------|----------------|--|
| Nose, Level 1 (NO. EXAMINED)                                 | (10)          | (9)             | (10)            | (10)           | (10)           |  |
| Transitional/Respiratory<br>Epithelium, Hyperplasia          |               |                 |                 |                |                |  |
| Transitional/Respiratory<br>Epithelium, Inflammation         | 8             | 8               | 9               | 10             | 10             |  |
| Nose, Level 2 (NO. EXAMINED)                                 | (10)          | (10)            | (10)            | (10)           | (10)           |  |
| Olfactory Epithelium, Basal<br>Cell, Hyperplasia             |               |                 |                 | 6              | 8              |  |
| Olfactory Epithelium,<br>Degeneration/Necrosis               |               |                 |                 | 5              | 8              |  |
| Transitional/Respiratory<br>Epithelium, Hyperplasia          |               |                 |                 |                |                |  |
| Transitional/Respiratory<br>Epithelium, Inflammation         | 2             |                 |                 | 4              | 5              |  |
| Nose, Level 3 (NO. EXAMINED)                                 | (10)          | (10)            | (10)            | (10)           | (10)           |  |
| Olfactory Epithelium, Basal<br>Cell, Hyperplasia             |               |                 |                 | 10             | 10             |  |
| Olfactory Epithelium,<br>Degeneration/Necrosis               |               |                 |                 | 8              | 10             |  |
| Respiratory Epithelium,<br>Inflammation                      |               |                 |                 |                |                |  |
| Nose, Level 4 (NO. EXAMINED)                                 | (10)          | (10)            | (10)            | (10)           | (10)           |  |
| Olfactory Epithelium, Basal<br>Cell, Hyperplasia             |               |                 |                 | 10             | 10             |  |
| Olfactory Epithelium,<br>Degeneration/Necrosis               |               |                 |                 | 7              | 10             |  |
| Olfactory Epithelium,<br>Inflammation                        |               |                 |                 |                |                |  |
| Nose, Level 5 (NO. EXAMINED)                                 | (10)          | (10)            | (10)            | (10)           | (10)           |  |
| Nasopharyngeal Duct, Goblet<br>Cell, Hypertrophy/Hyperplasia |               |                 |                 |                | 3              |  |
| Olfactory Epithelium, Basal<br>Cell, Hyperplasia             |               |                 |                 | 6              | 10             |  |
| Olfactory Epithelium,<br>Degeneration/Necrosis               |               |                 |                 | 2              | 7              |  |
| Nose, Tip (NO. EXAMINED)                                     | (10)          | (9)             | (10)            | (10)           | (10)           |  |
| Squamous Epithelium,<br>Hyperplasia                          |               |                 |                 |                |                |  |
| Squamous Epithelium,<br>Inflammation                         | 8             | 8               | 9               | 10             | 8              |  |

**HISTOPATHOLOGY INCIDENCE TABLES**  
**Recovery Sacrifice**

## HISTOPATHOLOGY INCIDENCE TABLE

GROUP  
0ppm

09001  
Recovery Sacrifice  
Male Rat

A  
N  
I  
M  
A  
L

|                                                              | 1 | 1 | 1 | 1 | 1 | 1 | 1 | 1 | 1 | 1 |  |  |  |  |  |  |  |  |  |
|--------------------------------------------------------------|---|---|---|---|---|---|---|---|---|---|--|--|--|--|--|--|--|--|--|
|                                                              | 1 | 1 | 1 | 1 | 1 | 1 | 1 | 1 | 1 | 1 |  |  |  |  |  |  |  |  |  |
|                                                              | 1 | 2 | 3 | 4 | 5 | 6 | 7 | 8 | 9 | 0 |  |  |  |  |  |  |  |  |  |
| Nose, Level 1                                                |   |   | X |   |   | X | X | X | X |   |  |  |  |  |  |  |  |  |  |
| Transitional/Respiratory<br>Epithelium, Hyperplasia          |   |   |   | 1 |   |   |   |   |   |   |  |  |  |  |  |  |  |  |  |
| Transitional/Respiratory<br>Epithelium, Inflammation         | 1 | 1 |   | 1 | 1 |   |   |   |   | 2 |  |  |  |  |  |  |  |  |  |
| Nose, Level 2                                                | X | X | X | X | X | X | X | X | X | X |  |  |  |  |  |  |  |  |  |
| Olfactory Epithelium, Basal<br>Cell, Hyperplasia             |   |   |   |   |   |   |   |   |   |   |  |  |  |  |  |  |  |  |  |
| Olfactory Epithelium,<br>Degeneration/Necrosis               |   |   |   |   |   |   |   |   |   |   |  |  |  |  |  |  |  |  |  |
| Transitional/Respiratory<br>Epithelium, Hyperplasia          |   |   |   |   |   |   |   |   |   |   |  |  |  |  |  |  |  |  |  |
| Transitional/Respiratory<br>Epithelium, Inflammation         |   |   |   |   |   |   |   |   |   |   |  |  |  |  |  |  |  |  |  |
| Nose, Level 3                                                | X | X | X | X |   | X |   | X | X | X |  |  |  |  |  |  |  |  |  |
| Olfactory Epithelium, Basal<br>Cell, Hyperplasia             |   |   |   |   |   |   |   |   |   |   |  |  |  |  |  |  |  |  |  |
| Olfactory Epithelium,<br>Degeneration/Necrosis               |   |   |   |   |   |   |   |   |   |   |  |  |  |  |  |  |  |  |  |
| Respiratory Epithelium,<br>Inflammation                      |   |   |   |   | 1 |   | 1 |   |   |   |  |  |  |  |  |  |  |  |  |
| Nose, Level 4                                                | X | X | X | X | X | X | X | X | X | X |  |  |  |  |  |  |  |  |  |
| Olfactory Epithelium, Basal<br>Cell, Hyperplasia             |   |   |   |   |   |   |   |   |   |   |  |  |  |  |  |  |  |  |  |
| Olfactory Epithelium,<br>Degeneration/Necrosis               |   |   |   |   |   |   |   |   |   |   |  |  |  |  |  |  |  |  |  |
| Olfactory Epithelium,<br>Inflammation                        |   |   |   |   |   |   |   |   |   |   |  |  |  |  |  |  |  |  |  |
| Nose, Level 5                                                | X | X | X | X | X | X | X | X | X | X |  |  |  |  |  |  |  |  |  |
| Nasopharyngeal Duct, Goblet<br>Cell, Hypertrophy/Hyperplasia |   |   |   |   |   |   |   |   |   |   |  |  |  |  |  |  |  |  |  |
| Olfactory Epithelium, Basal<br>Cell, Hyperplasia             |   |   |   |   |   |   |   |   |   |   |  |  |  |  |  |  |  |  |  |
| Olfactory Epithelium,<br>Degeneration/Necrosis               |   |   |   |   |   |   |   |   |   |   |  |  |  |  |  |  |  |  |  |

# HISTOPATHOLOGY INCIDENCE TABLE

GROUP  
0ppm

09001  
Recovery Sacrifice  
Male Rat

A  
N  
I  
M  
A  
L

|                                      | 1 | 1 | 1 | 1 | 1 | 1 | 1 | 1 | 1 | 1 |   |  |  |  |  |  |  |  |  |  |  |  |  |
|--------------------------------------|---|---|---|---|---|---|---|---|---|---|---|--|--|--|--|--|--|--|--|--|--|--|--|
|                                      | 1 | 1 | 1 | 1 | 1 | 1 | 1 | 1 | 1 | 1 | 2 |  |  |  |  |  |  |  |  |  |  |  |  |
|                                      | 1 | 2 | 3 | 4 | 5 | 6 | 7 | 8 | 9 | 0 |   |  |  |  |  |  |  |  |  |  |  |  |  |
| Nose, Tip                            | X |   |   | X | X |   | X | X |   |   |   |  |  |  |  |  |  |  |  |  |  |  |  |
| Squamous Epithelium,<br>Hyperplasia  |   |   |   |   |   |   |   |   |   |   | 1 |  |  |  |  |  |  |  |  |  |  |  |  |
| Squamous Epithelium,<br>Inflammation |   | 1 | 1 |   |   | 2 |   |   | 1 | 2 |   |  |  |  |  |  |  |  |  |  |  |  |  |
|                                      |   |   |   |   |   |   |   |   |   |   |   |  |  |  |  |  |  |  |  |  |  |  |  |
|                                      |   |   |   |   |   |   |   |   |   |   |   |  |  |  |  |  |  |  |  |  |  |  |  |
|                                      |   |   |   |   |   |   |   |   |   |   |   |  |  |  |  |  |  |  |  |  |  |  |  |
|                                      |   |   |   |   |   |   |   |   |   |   |   |  |  |  |  |  |  |  |  |  |  |  |  |
|                                      |   |   |   |   |   |   |   |   |   |   |   |  |  |  |  |  |  |  |  |  |  |  |  |
|                                      |   |   |   |   |   |   |   |   |   |   |   |  |  |  |  |  |  |  |  |  |  |  |  |
|                                      |   |   |   |   |   |   |   |   |   |   |   |  |  |  |  |  |  |  |  |  |  |  |  |
|                                      |   |   |   |   |   |   |   |   |   |   |   |  |  |  |  |  |  |  |  |  |  |  |  |
|                                      |   |   |   |   |   |   |   |   |   |   |   |  |  |  |  |  |  |  |  |  |  |  |  |
|                                      |   |   |   |   |   |   |   |   |   |   |   |  |  |  |  |  |  |  |  |  |  |  |  |
|                                      |   |   |   |   |   |   |   |   |   |   |   |  |  |  |  |  |  |  |  |  |  |  |  |
|                                      |   |   |   |   |   |   |   |   |   |   |   |  |  |  |  |  |  |  |  |  |  |  |  |
|                                      |   |   |   |   |   |   |   |   |   |   |   |  |  |  |  |  |  |  |  |  |  |  |  |
|                                      |   |   |   |   |   |   |   |   |   |   |   |  |  |  |  |  |  |  |  |  |  |  |  |
|                                      |   |   |   |   |   |   |   |   |   |   |   |  |  |  |  |  |  |  |  |  |  |  |  |
|                                      |   |   |   |   |   |   |   |   |   |   |   |  |  |  |  |  |  |  |  |  |  |  |  |
|                                      |   |   |   |   |   |   |   |   |   |   |   |  |  |  |  |  |  |  |  |  |  |  |  |
|                                      |   |   |   |   |   |   |   |   |   |   |   |  |  |  |  |  |  |  |  |  |  |  |  |
|                                      |   |   |   |   |   |   |   |   |   |   |   |  |  |  |  |  |  |  |  |  |  |  |  |
|                                      |   |   |   |   |   |   |   |   |   |   |   |  |  |  |  |  |  |  |  |  |  |  |  |
|                                      |   |   |   |   |   |   |   |   |   |   |   |  |  |  |  |  |  |  |  |  |  |  |  |
|                                      |   |   |   |   |   |   |   |   |   |   |   |  |  |  |  |  |  |  |  |  |  |  |  |
|                                      |   |   |   |   |   |   |   |   |   |   |   |  |  |  |  |  |  |  |  |  |  |  |  |
|                                      |   |   |   |   |   |   |   |   |   |   |   |  |  |  |  |  |  |  |  |  |  |  |  |
|                                      |   |   |   |   |   |   |   |   |   |   |   |  |  |  |  |  |  |  |  |  |  |  |  |
|                                      |   |   |   |   |   |   |   |   |   |   |   |  |  |  |  |  |  |  |  |  |  |  |  |
|                                      |   |   |   |   |   |   |   |   |   |   |   |  |  |  |  |  |  |  |  |  |  |  |  |
|                                      |   |   |   |   |   |   |   |   |   |   |   |  |  |  |  |  |  |  |  |  |  |  |  |
|                                      |   |   |   |   |   |   |   |   |   |   |   |  |  |  |  |  |  |  |  |  |  |  |  |
|                                      |   |   |   |   |   |   |   |   |   |   |   |  |  |  |  |  |  |  |  |  |  |  |  |
|                                      |   |   |   |   |   |   |   |   |   |   |   |  |  |  |  |  |  |  |  |  |  |  |  |
|                                      |   |   |   |   |   |   |   |   |   |   |   |  |  |  |  |  |  |  |  |  |  |  |  |
|                                      |   |   |   |   |   |   |   |   |   |   |   |  |  |  |  |  |  |  |  |  |  |  |  |

Key : X=Not Remarkable N=No Section I=Incomplete A=Autolysis  
1=minimal 2=slight/mild 3=moderate 4=moderately severe 5=severe/high  
P=Present B=Benign M=Malignant  
m=missing one paired organ u=unscheduled sac./death

# HISTOPATHOLOGY INCIDENCE TABLE

GROUP  
0.1ppm

09001  
Recovery Sacrifice  
Male Rat

A  
N  
I  
M  
A  
L

|                                                           | 1 | 2 | 3 | 4 | 5 | 6 | 7 | 8 | 9 | 10 | 11 | 12 | 13 | 14 | 15 | 16 | 17 | 18 | 19 | 20 |
|-----------------------------------------------------------|---|---|---|---|---|---|---|---|---|----|----|----|----|----|----|----|----|----|----|----|
|                                                           | 1 | 1 | 1 | 1 | 1 | 1 | 1 | 1 | 1 | 1  | 1  | 1  | 1  | 1  | 1  | 1  | 1  | 1  | 1  | 1  |
|                                                           | 4 | 4 | 4 | 4 | 5 | 5 | 5 | 5 | 5 | 5  | 5  | 5  | 5  | 5  | 5  | 5  | 5  | 5  | 5  | 5  |
|                                                           | 6 | 7 | 8 | 9 | 0 | 1 | 2 | 3 | 4 | 5  |    |    |    |    |    |    |    |    |    |    |
| Nose, Level 1                                             |   |   | X | X |   |   |   |   |   |    |    | X  | X  |    |    |    |    |    |    |    |
| Transitional/Respiratory Epithelium, Hyperplasia          |   |   |   |   |   |   |   |   |   |    |    |    |    |    |    |    |    |    |    |    |
| Transitional/Respiratory Epithelium, Inflammation         | 1 | 1 |   |   | 1 | 1 | 2 | 1 |   |    |    |    |    |    |    |    |    |    |    |    |
| Nose, Level 2                                             | X | X | X | X | X | X | X | X | X | X  | X  | X  | X  | X  | X  | X  | X  | X  | X  | X  |
| Olfactory Epithelium, Basal Cell, Hyperplasia             |   |   |   |   |   |   |   |   |   |    |    |    |    |    |    |    |    |    |    |    |
| Olfactory Epithelium, Degeneration/Necrosis               |   |   |   |   |   |   |   |   |   |    |    |    |    |    |    |    |    |    |    |    |
| Transitional/Respiratory Epithelium, Hyperplasia          |   |   |   |   |   |   |   |   |   |    |    |    |    |    |    |    |    |    |    |    |
| Transitional/Respiratory Epithelium, Inflammation         |   |   |   |   |   |   |   |   |   |    |    |    |    |    |    |    |    |    |    |    |
| Nose, Level 3                                             | X | X | X | X | X | X | X | X | X | X  | X  | X  | X  | X  | X  | X  | X  | X  | X  | X  |
| Olfactory Epithelium, Basal Cell, Hyperplasia             |   |   |   |   |   |   |   |   |   |    |    |    |    |    |    |    |    |    |    |    |
| Olfactory Epithelium, Degeneration/Necrosis               |   |   |   |   |   |   |   |   |   |    |    |    |    |    |    |    |    |    |    |    |
| Respiratory Epithelium, Inflammation                      |   |   |   |   |   |   |   |   |   |    |    |    |    |    |    |    |    |    |    |    |
| Nose, Level 4                                             | X | X | X | X | X | X | X | X | X | X  | X  | X  | X  | X  | X  | X  | X  | X  | X  | X  |
| Olfactory Epithelium, Basal Cell, Hyperplasia             |   |   |   |   |   |   |   |   |   |    |    |    |    |    |    |    |    |    |    |    |
| Olfactory Epithelium, Degeneration/Necrosis               |   |   |   |   |   |   |   |   |   |    |    |    |    |    |    |    |    |    |    |    |
| Olfactory Epithelium, Inflammation                        |   |   |   |   |   |   |   |   |   |    |    |    |    |    |    |    |    |    |    |    |
| Nose, Level 5                                             | X | X | X | X | X | X | X | X | X | X  | X  | X  | X  | X  | X  | X  | X  | X  | X  | X  |
| Nasopharyngeal Duct, Goblet Cell, Hypertrophy/Hyperplasia |   |   |   |   |   |   |   |   |   |    |    |    |    |    |    |    |    |    |    |    |
| Olfactory Epithelium, Basal Cell, Hyperplasia             |   |   |   |   |   |   |   |   |   |    |    |    |    |    |    |    |    |    |    |    |
| Olfactory Epithelium, Degeneration/Necrosis               |   |   |   |   |   |   |   |   |   |    |    |    |    |    |    |    |    |    |    |    |

Key : X=Not Remarkable N=No Section I=Incomplete A=Autolysis  
 1=minimal 2=slight/mild 3=moderate 4=moderately severe 5=severe/high  
 P=Present B=Benign M=Malignant  
 m=missing one paired organ u=unscheduled sac./death



# HISTOPATHOLOGY INCIDENCE TABLE

|                                                              | GROUP<br>1.0ppm |   |   |   |   |   |   |   |   |   | GROUP<br>10ppm |   |   |   |   |   |   |   |   |   |
|--------------------------------------------------------------|-----------------|---|---|---|---|---|---|---|---|---|----------------|---|---|---|---|---|---|---|---|---|
|                                                              | 1               | 1 | 1 | 1 | 1 | 1 | 1 | 1 | 1 | 1 | 2              | 2 | 2 | 2 | 2 | 2 | 2 | 2 | 2 | 2 |
|                                                              | 8               | 8 | 8 | 8 | 8 | 8 | 8 | 8 | 8 | 1 | 1              | 1 | 2 | 2 | 2 | 2 | 2 | 2 | 2 |   |
|                                                              | 1               | 2 | 3 | 4 | 5 | 6 | 7 | 8 | 9 | 6 | 7              | 8 | 0 | 1 | 2 | 3 | 4 | 5 | 5 |   |
| 09001<br>Recovery Sacrifice<br>Male Rat                      |                 |   |   |   |   |   |   |   |   |   |                |   |   |   |   |   |   |   |   |   |
| A<br>N<br>I<br>M<br>A<br>L                                   |                 |   |   |   |   |   |   |   |   |   |                |   |   |   |   |   |   |   |   |   |
| Nose, Level 1                                                |                 | X |   | X | X | X |   |   |   |   |                |   |   |   |   | X |   |   |   |   |
| Transitional/Respiratory<br>Epithelium, Hyperplasia          |                 |   |   |   |   |   |   |   |   |   |                |   |   |   |   |   |   |   |   |   |
| Transitional/Respiratory<br>Epithelium, Inflammation         | 1               |   | 2 |   |   |   | 1 | 1 | 1 | 1 | 1              | 1 | 1 | 2 |   | 1 | 1 | 1 | 1 |   |
| Nose, Level 2                                                | X               | X | X | X | X | X | X | X | X |   |                |   |   | X |   |   |   |   |   |   |
| Olfactory Epithelium, Basal<br>Cell, Hyperplasia             |                 |   |   |   |   |   |   |   |   | 1 | 1              | 1 |   | 1 | 1 | 1 | 1 | 1 | 1 |   |
| Olfactory Epithelium,<br>Degeneration/Necrosis               |                 |   |   |   |   |   |   |   |   |   |                | 1 |   | 1 | 1 | 2 | 2 | 1 | 1 |   |
| Transitional/Respiratory<br>Epithelium, Hyperplasia          |                 |   |   |   |   |   |   |   |   |   |                | 1 |   |   |   |   |   |   |   |   |
| Transitional/Respiratory<br>Epithelium, Inflammation         |                 |   |   |   |   |   |   |   |   |   |                |   |   |   |   |   |   |   |   |   |
| Nose, Level 3                                                | X               | X | X | X | X | X | X | X | X |   |                |   |   |   |   |   |   |   |   |   |
| Olfactory Epithelium, Basal<br>Cell, Hyperplasia             |                 |   |   |   |   |   |   |   |   |   |                | 1 | 1 | 1 | 1 | 1 | 1 | 1 | 1 |   |
| Olfactory Epithelium,<br>Degeneration/Necrosis               |                 |   |   |   |   |   |   |   |   | 1 | 1              | 1 | 1 | 1 | 1 | 1 | 1 | 1 | 1 |   |
| Respiratory Epithelium,<br>Inflammation                      |                 |   |   |   |   |   |   |   |   |   |                |   |   |   |   |   |   |   |   |   |
| Nose, Level 4                                                | X               | X | X | X | X | X | X | X | X |   |                |   |   |   |   |   |   |   | X |   |
| Olfactory Epithelium, Basal<br>Cell, Hyperplasia             |                 |   |   |   |   |   |   |   |   | 1 |                | 1 | 1 | 1 | 1 |   | 1 |   |   |   |
| Olfactory Epithelium,<br>Degeneration/Necrosis               |                 |   |   |   |   |   |   |   |   | 1 | 1              | 1 | 1 | 1 | 1 | 1 | 1 | 1 |   |   |
| Olfactory Epithelium,<br>Inflammation                        |                 |   |   |   |   |   |   |   |   |   |                |   |   |   |   |   |   |   |   |   |
| Nose, Level 5                                                | X               | X | X | X | X | X | X | X | X | X | X              | X |   | X |   | X | X | X | X |   |
| Nasopharyngeal Duct, Goblet<br>Cell, Hypertrophy/Hyperplasia |                 |   |   |   |   |   |   |   |   |   |                |   |   |   |   | 1 |   |   |   |   |
| Olfactory Epithelium, Basal<br>Cell, Hyperplasia             |                 |   |   |   |   |   |   |   |   |   |                |   |   | 1 | 1 |   |   |   |   |   |
| Olfactory Epithelium,<br>Degeneration/Necrosis               |                 |   |   |   |   |   |   |   |   |   |                |   |   |   |   |   |   |   |   |   |

Key : X-Not Remarkable N-No Section I-Incomplete A-Autolysis  
 1-minimal 2-slight/mild 3-moderate 4-moderately severe 5-severe/high  
 P=Present B=Benign M=Malignant  
 m=missing one paired organ u=unscheduled sac./death

**HISTOPATHOLOGY INCIDENCE TABLE**

GROUP  
1.0ppm

GROUP  
10ppm

09001  
Recovery Sacrifice  
Male Rat

A  
N  
I  
M  
A  
L

|                                   | 1 | 1 | 1 | 1 | 1 | 1 | 1 | 1 | 1 | 1 | 2 | 2 | 2 | 2 | 2 | 2 | 2 | 2 | 2 |
|-----------------------------------|---|---|---|---|---|---|---|---|---|---|---|---|---|---|---|---|---|---|---|
|                                   | 8 | 8 | 8 | 8 | 8 | 8 | 8 | 8 | 8 | 9 | 1 | 1 | 1 | 2 | 2 | 2 | 2 | 2 | 2 |
|                                   | 1 | 2 | 3 | 4 | 5 | 6 | 7 | 8 | 9 | 0 | 6 | 7 | 8 | 0 | 1 | 2 | 3 | 4 | 5 |
| Nose, Tip                         | X |   |   | X | X | X | X | X |   | X |   |   |   | X |   |   |   |   | X |
| Squamous Epithelium, Hyperplasia  |   |   |   |   |   |   |   |   |   |   |   |   |   |   |   |   |   |   |   |
| Squamous Epithelium, Inflammation |   | 1 | 2 |   |   |   |   |   | 2 |   | 1 | 1 |   | 1 | 1 | 1 | 1 |   | 1 |
|                                   |   |   |   |   |   |   |   |   |   |   |   |   |   |   |   |   |   |   |   |
|                                   |   |   |   |   |   |   |   |   |   |   |   |   |   |   |   |   |   |   |   |
|                                   |   |   |   |   |   |   |   |   |   |   |   |   |   |   |   |   |   |   |   |
|                                   |   |   |   |   |   |   |   |   |   |   |   |   |   |   |   |   |   |   |   |
|                                   |   |   |   |   |   |   |   |   |   |   |   |   |   |   |   |   |   |   |   |
|                                   |   |   |   |   |   |   |   |   |   |   |   |   |   |   |   |   |   |   |   |
|                                   |   |   |   |   |   |   |   |   |   |   |   |   |   |   |   |   |   |   |   |
|                                   |   |   |   |   |   |   |   |   |   |   |   |   |   |   |   |   |   |   |   |
|                                   |   |   |   |   |   |   |   |   |   |   |   |   |   |   |   |   |   |   |   |
|                                   |   |   |   |   |   |   |   |   |   |   |   |   |   |   |   |   |   |   |   |
|                                   |   |   |   |   |   |   |   |   |   |   |   |   |   |   |   |   |   |   |   |
|                                   |   |   |   |   |   |   |   |   |   |   |   |   |   |   |   |   |   |   |   |
|                                   |   |   |   |   |   |   |   |   |   |   |   |   |   |   |   |   |   |   |   |
|                                   |   |   |   |   |   |   |   |   |   |   |   |   |   |   |   |   |   |   |   |
|                                   |   |   |   |   |   |   |   |   |   |   |   |   |   |   |   |   |   |   |   |
|                                   |   |   |   |   |   |   |   |   |   |   |   |   |   |   |   |   |   |   |   |
|                                   |   |   |   |   |   |   |   |   |   |   |   |   |   |   |   |   |   |   |   |
|                                   |   |   |   |   |   |   |   |   |   |   |   |   |   |   |   |   |   |   |   |
|                                   |   |   |   |   |   |   |   |   |   |   |   |   |   |   |   |   |   |   |   |
|                                   |   |   |   |   |   |   |   |   |   |   |   |   |   |   |   |   |   |   |   |
|                                   |   |   |   |   |   |   |   |   |   |   |   |   |   |   |   |   |   |   |   |
|                                   |   |   |   |   |   |   |   |   |   |   |   |   |   |   |   |   |   |   |   |
|                                   |   |   |   |   |   |   |   |   |   |   |   |   |   |   |   |   |   |   |   |
|                                   |   |   |   |   |   |   |   |   |   |   |   |   |   |   |   |   |   |   |   |
|                                   |   |   |   |   |   |   |   |   |   |   |   |   |   |   |   |   |   |   |   |
|                                   |   |   |   |   |   |   |   |   |   |   |   |   |   |   |   |   |   |   |   |
|                                   |   |   |   |   |   |   |   |   |   |   |   |   |   |   |   |   |   |   |   |
|                                   |   |   |   |   |   |   |   |   |   |   |   |   |   |   |   |   |   |   |   |
|                                   |   |   |   |   |   |   |   |   |   |   |   |   |   |   |   |   |   |   |   |
|                                   |   |   |   |   |   |   |   |   |   |   |   |   |   |   |   |   |   |   |   |
|                                   |   |   |   |   |   |   |   |   |   |   |   |   |   |   |   |   |   |   |   |
|                                   |   |   |   |   |   |   |   |   |   |   |   |   |   |   |   |   |   |   |   |
|                                   |   |   |   |   |   |   |   |   |   |   |   |   |   |   |   |   |   |   |   |
|                                   |   |   |   |   |   |   |   |   |   |   |   |   |   |   |   |   |   |   |   |
|                                   |   |   |   |   |   |   |   |   |   |   |   |   |   |   |   |   |   |   |   |
|                                   |   |   |   |   |   |   |   |   |   |   |   |   |   |   |   |   |   |   |   |
|                                   |   |   |   |   |   |   |   |   |   |   |   |   |   |   |   |   |   |   |   |
|                                   |   |   |   |   |   |   |   |   |   |   |   |   |   |   |   |   |   |   |   |

Key : X-Not Remarkable N-No Section I-Incomplete A-Autolysis  
 1-minimal 2-slight/mild 3-moderate 4-moderately severe 5-severe/high  
 P-Present B-Benign M-Malignant  
 m-missing one paired organ u-unscheduled sac./death



# HISTOPATHOLOGY INCIDENCE TABLE

GROUP  
30ppm

09001  
Recovery Sacrifice  
Male Rat

A  
N  
I  
M  
A  
L

|                                                           | 2 | 2 | 2 | 2 | 2 | 2 | 2 | 2 | 2 | 2 |  |  |  |  |  |  |  |  |  |  |
|-----------------------------------------------------------|---|---|---|---|---|---|---|---|---|---|--|--|--|--|--|--|--|--|--|--|
|                                                           | 5 | 5 | 5 | 5 | 5 | 5 | 5 | 5 | 5 | 5 |  |  |  |  |  |  |  |  |  |  |
|                                                           | 1 | 2 | 3 | 4 | 5 | 6 | 7 | 8 | 9 | 0 |  |  |  |  |  |  |  |  |  |  |
| <b>Nose, Level 1</b>                                      |   |   |   |   |   |   | X |   |   | X |  |  |  |  |  |  |  |  |  |  |
| Transitional/Respiratory Epithelium, Hyperplasia          |   |   |   |   |   |   |   |   |   |   |  |  |  |  |  |  |  |  |  |  |
| Transitional/Respiratory Epithelium, Inflammation         | 1 | 2 | 1 | 1 | 1 | 1 |   | 1 | 1 |   |  |  |  |  |  |  |  |  |  |  |
| <b>Nose, Level 2</b>                                      |   |   |   |   | X |   |   |   |   | X |  |  |  |  |  |  |  |  |  |  |
| Olfactory Epithelium, Basal Cell, Hyperplasia             | 1 | 2 | 3 | 1 |   | 3 | 3 | 3 | 3 |   |  |  |  |  |  |  |  |  |  |  |
| Olfactory Epithelium, Degeneration/Necrosis               | 1 | 2 | 1 | 1 |   | 2 | 2 | 2 | 2 |   |  |  |  |  |  |  |  |  |  |  |
| Transitional/Respiratory Epithelium, Hyperplasia          |   |   |   |   |   |   |   |   |   |   |  |  |  |  |  |  |  |  |  |  |
| Transitional/Respiratory Epithelium, Inflammation         |   |   |   |   |   |   |   |   |   |   |  |  |  |  |  |  |  |  |  |  |
| <b>Nose, Level 3</b>                                      |   |   |   |   |   |   |   |   |   |   |  |  |  |  |  |  |  |  |  |  |
| Olfactory Epithelium, Basal Cell, Hyperplasia             | 1 | 2 | 2 | 2 | 2 | 2 | 2 | 2 | 2 | 2 |  |  |  |  |  |  |  |  |  |  |
| Olfactory Epithelium, Degeneration/Necrosis               | 1 | 1 | 1 | 2 | 2 | 2 | 1 | 2 | 3 | 2 |  |  |  |  |  |  |  |  |  |  |
| Respiratory Epithelium, Inflammation                      |   |   |   |   |   |   |   |   |   |   |  |  |  |  |  |  |  |  |  |  |
| <b>Nose, Level 4</b>                                      |   |   |   |   |   |   |   |   |   |   |  |  |  |  |  |  |  |  |  |  |
| Olfactory Epithelium, Basal Cell, Hyperplasia             | 2 | 2 | 2 | 2 | 2 | 2 | 2 | 2 | 1 | 1 |  |  |  |  |  |  |  |  |  |  |
| Olfactory Epithelium, Degeneration/Necrosis               | 1 | 1 | 1 | 1 | 1 | 2 | 1 | 2 | 2 | 2 |  |  |  |  |  |  |  |  |  |  |
| Olfactory Epithelium, Inflammation                        |   |   |   |   |   |   |   | 1 |   |   |  |  |  |  |  |  |  |  |  |  |
| <b>Nose, Level 5</b>                                      |   |   |   |   | X |   |   |   |   |   |  |  |  |  |  |  |  |  |  |  |
| Nasopharyngeal Duct, Goblet Cell, Hypertrophy/Hyperplasia |   |   |   |   |   |   |   |   |   |   |  |  |  |  |  |  |  |  |  |  |
| Olfactory Epithelium, Basal Cell, Hyperplasia             | 2 | 1 | 1 | 2 |   | 2 | 2 | 2 | 1 | 1 |  |  |  |  |  |  |  |  |  |  |
| Olfactory Epithelium, Degeneration/Necrosis               | 1 | 1 |   |   |   | 1 | 1 | 1 |   | 1 |  |  |  |  |  |  |  |  |  |  |

Key : X=Not Remarkable N=No Section I=Incomplete A=Autolysis  
 1=Minimal 2=slight/mild 3=moderate 4=moderately severe 5=severe/high  
 P=Present B=Benign M=Malignant  
 m=missing one paired organ u=unscheduled sac./death

### HISTOPATHOLOGY INCIDENCE TABLE

GROUP  
30ppm

09001  
Recovery Sacrifice  
Male Rat

A  
N  
I  
M  
A  
L

|                                   | 2 | 2 | 2 | 2 | 2 | 2 | 2 | 2 | 2 | 2 |  |  |  |  |  |  |  |  |  |  |  |
|-----------------------------------|---|---|---|---|---|---|---|---|---|---|--|--|--|--|--|--|--|--|--|--|--|
|                                   | 5 | 5 | 5 | 5 | 5 | 5 | 5 | 5 | 5 | 5 |  |  |  |  |  |  |  |  |  |  |  |
|                                   | 1 | 2 | 3 | 4 | 5 | 6 | 7 | 8 | 9 | 0 |  |  |  |  |  |  |  |  |  |  |  |
| Nose, Tip                         |   | X | X | X | X |   | X | X |   |   |  |  |  |  |  |  |  |  |  |  |  |
| Squamous Epithelium, Hyperplasia  |   |   |   |   |   |   |   |   |   |   |  |  |  |  |  |  |  |  |  |  |  |
| Squamous Epithelium, Inflammation | 1 |   |   |   |   | 1 |   |   | 2 | 1 |  |  |  |  |  |  |  |  |  |  |  |
|                                   |   |   |   |   |   |   |   |   |   |   |  |  |  |  |  |  |  |  |  |  |  |
|                                   |   |   |   |   |   |   |   |   |   |   |  |  |  |  |  |  |  |  |  |  |  |
|                                   |   |   |   |   |   |   |   |   |   |   |  |  |  |  |  |  |  |  |  |  |  |
|                                   |   |   |   |   |   |   |   |   |   |   |  |  |  |  |  |  |  |  |  |  |  |
|                                   |   |   |   |   |   |   |   |   |   |   |  |  |  |  |  |  |  |  |  |  |  |
|                                   |   |   |   |   |   |   |   |   |   |   |  |  |  |  |  |  |  |  |  |  |  |
|                                   |   |   |   |   |   |   |   |   |   |   |  |  |  |  |  |  |  |  |  |  |  |
|                                   |   |   |   |   |   |   |   |   |   |   |  |  |  |  |  |  |  |  |  |  |  |
|                                   |   |   |   |   |   |   |   |   |   |   |  |  |  |  |  |  |  |  |  |  |  |
|                                   |   |   |   |   |   |   |   |   |   |   |  |  |  |  |  |  |  |  |  |  |  |
|                                   |   |   |   |   |   |   |   |   |   |   |  |  |  |  |  |  |  |  |  |  |  |
|                                   |   |   |   |   |   |   |   |   |   |   |  |  |  |  |  |  |  |  |  |  |  |
|                                   |   |   |   |   |   |   |   |   |   |   |  |  |  |  |  |  |  |  |  |  |  |
|                                   |   |   |   |   |   |   |   |   |   |   |  |  |  |  |  |  |  |  |  |  |  |
|                                   |   |   |   |   |   |   |   |   |   |   |  |  |  |  |  |  |  |  |  |  |  |
|                                   |   |   |   |   |   |   |   |   |   |   |  |  |  |  |  |  |  |  |  |  |  |
|                                   |   |   |   |   |   |   |   |   |   |   |  |  |  |  |  |  |  |  |  |  |  |
|                                   |   |   |   |   |   |   |   |   |   |   |  |  |  |  |  |  |  |  |  |  |  |
|                                   |   |   |   |   |   |   |   |   |   |   |  |  |  |  |  |  |  |  |  |  |  |
|                                   |   |   |   |   |   |   |   |   |   |   |  |  |  |  |  |  |  |  |  |  |  |
|                                   |   |   |   |   |   |   |   |   |   |   |  |  |  |  |  |  |  |  |  |  |  |
|                                   |   |   |   |   |   |   |   |   |   |   |  |  |  |  |  |  |  |  |  |  |  |

Key : X=Not Remarkable N=No Section I=Incomplete A=Autolysis  
 1=minimal 2=slight/mild 3=moderate 4=moderately severe 5=severe/high  
 P=Present B=Benign M=Malignant  
 m=missing one paired organ u=unscheduled sac./death

# HISTOPATHOLOGY INCIDENCE TABLE

GROUP  
0ppm

09001  
Recovery Sacrifice  
Female Rat

A  
N  
I  
M  
A  
L

|                                                           | 3 | 3 | 3 | 3 | 3 | 3 | 3 | 3 | 3 | 3 | 3 | 3 | 3 | 3 | 3 | 3 | 3 | 3 | 3 |
|-----------------------------------------------------------|---|---|---|---|---|---|---|---|---|---|---|---|---|---|---|---|---|---|---|
|                                                           | 1 | 1 | 1 | 1 | 1 | 1 | 1 | 1 | 1 | 1 | 1 | 1 | 1 | 1 | 1 | 1 | 1 | 1 | 1 |
|                                                           | 1 | 2 | 3 | 4 | 5 | 6 | 7 | 8 | 9 | 0 |   |   |   |   |   |   |   |   |   |
| Nose, Level 1                                             |   |   |   | X |   | X |   |   |   |   |   |   |   |   |   |   |   |   |   |
| Transitional/Respiratory Epithelium, Hyperplasia          |   |   |   |   |   |   |   |   |   |   |   |   |   |   |   |   |   |   |   |
| Transitional/Respiratory Epithelium, Inflammation         | 1 | 1 | 1 |   | 2 |   | 2 | 1 | 3 | 1 |   |   |   |   |   |   |   |   |   |
| Nose, Level 2                                             | X | X | X | X |   |   | X | X | X | X |   |   |   |   |   |   |   |   |   |
| Olfactory Epithelium, Basal Cell, Hyperplasia             |   |   |   |   |   |   |   |   |   |   |   |   |   |   |   |   |   |   |   |
| Olfactory Epithelium, Degeneration/Necrosis               |   |   |   |   |   |   |   |   |   |   |   |   |   |   |   |   |   |   |   |
| Transitional/Respiratory Epithelium, Hyperplasia          |   |   |   |   |   |   |   |   |   |   |   |   |   |   |   |   |   |   |   |
| Transitional/Respiratory Epithelium, Inflammation         |   |   |   |   | 1 | 1 |   |   |   |   |   |   |   |   |   |   |   |   |   |
| Nose, Level 3                                             | X | X | X | X | X | X | X | X | X | X |   |   |   |   |   |   |   |   |   |
| Olfactory Epithelium, Basal Cell, Hyperplasia             |   |   |   |   |   |   |   |   |   |   |   |   |   |   |   |   |   |   |   |
| Olfactory Epithelium, Degeneration/Necrosis               |   |   |   |   |   |   |   |   |   |   |   |   |   |   |   |   |   |   |   |
| Respiratory Epithelium, Inflammation                      |   |   |   |   |   |   |   |   |   |   |   |   |   |   |   |   |   |   |   |
| Nose, Level 4                                             | X | X | X | X | X | X | X | X | X | X |   |   |   |   |   |   |   |   |   |
| Olfactory Epithelium, Basal Cell, Hyperplasia             |   |   |   |   |   |   |   |   |   |   |   |   |   |   |   |   |   |   |   |
| Olfactory Epithelium, Degeneration/Necrosis               |   |   |   |   |   |   |   |   |   |   |   |   |   |   |   |   |   |   |   |
| Olfactory Epithelium, Inflammation                        |   |   |   |   |   |   |   |   |   |   |   |   |   |   |   |   |   |   |   |
| Nose, Level 5                                             | X | X | X | X | X | X | X | X | X | X |   |   |   |   |   |   |   |   |   |
| Nasopharyngeal Duct, Goblet Cell, Hypertrophy/Hyperplasia |   |   |   |   |   |   |   |   |   |   |   |   |   |   |   |   |   |   |   |
| Olfactory Epithelium, Basal Cell, Hyperplasia             |   |   |   |   |   |   |   |   |   |   |   |   |   |   |   |   |   |   |   |
| Olfactory Epithelium, Degeneration/Necrosis               |   |   |   |   |   |   |   |   |   |   |   |   |   |   |   |   |   |   |   |

Key : X=Not Remarkable N=No Section I=Incomplete A=Autolysis  
 1=minimal 2=slight/mild 3=moderate 4=moderately severe 5=severe/high  
 P=Present B=Benign M=Malignant  
 m=missing one paired organ u=unscheduled sac./death

# HISTOPATHOLOGY INCIDENCE TABLE

GROUP  
0ppm

09001  
Recovery Sacrifice  
Female Rat

A  
N  
I  
M  
A  
L

|                                      | 1 | 2 | 3 | 4 | 5 | 6 | 7 | 8 | 9 | 0 |  |  |  |  |  |  |  |  |  |
|--------------------------------------|---|---|---|---|---|---|---|---|---|---|--|--|--|--|--|--|--|--|--|
|                                      | 3 | 3 | 3 | 3 | 3 | 3 | 3 | 3 | 3 | 3 |  |  |  |  |  |  |  |  |  |
|                                      | 1 | 1 | 1 | 1 | 1 | 1 | 1 | 1 | 1 | 2 |  |  |  |  |  |  |  |  |  |
|                                      | 1 | 2 | 3 | 4 | 5 | 6 | 7 | 8 | 9 | 0 |  |  |  |  |  |  |  |  |  |
| Nose, Tip                            |   |   | X | X |   |   |   |   |   |   |  |  |  |  |  |  |  |  |  |
| Squamous Epithelium,<br>Hyperplasia  |   |   |   |   |   |   |   |   |   |   |  |  |  |  |  |  |  |  |  |
| Squamous Epithelium,<br>Inflammation | 1 | 1 |   |   | 2 | 1 | 2 | 2 | 3 | 1 |  |  |  |  |  |  |  |  |  |

Key : X-Not Remarkable N-No Section I-Incomplete A-Autolysis  
 1-minimal 2-slight/mild 3-moderate 4-moderately severe 5-severe/high  
 P-Present B-Benign M-Malignant  
 m=missing one paired organ u=unscheduled sac./death

# HISTOPATHOLOGY INCIDENCE TABLE

GROUP  
0.1ppm

09001  
Recovery Sacrifice  
Female Rat

A  
N  
I  
M  
A  
L

|                                                           | 3 | 3 | 3 | 3 | 3 | 3 | 3 | 3 | 3 | 3 |
|-----------------------------------------------------------|---|---|---|---|---|---|---|---|---|---|
|                                                           | 4 | 4 | 4 | 4 | 5 | 5 | 5 | 5 | 5 | 5 |
|                                                           | 6 | 7 | 8 | 9 | 0 | 1 | 2 | 3 | 4 | 5 |
| Nose, Level 1                                             |   |   |   |   |   |   | N |   |   | X |
| Transitional/Respiratory Epithelium, Hyperplasia          |   |   |   |   |   |   |   |   |   |   |
| Transitional/Respiratory Epithelium, Inflammation         | 1 | 2 | 1 | 1 | 1 | 2 |   | 2 | 2 |   |
| Nose, Level 2                                             | X | X | X | X | X | X | X | X | X | X |
| Olfactory Epithelium, Basal Cell, Hyperplasia             |   |   |   |   |   |   |   |   |   |   |
| Olfactory Epithelium, Degeneration/Necrosis               |   |   |   |   |   |   |   |   |   |   |
| Transitional/Respiratory Epithelium, Hyperplasia          |   |   |   |   |   |   |   |   |   |   |
| Transitional/Respiratory Epithelium, Inflammation         |   |   |   |   |   |   |   |   |   |   |
| Nose, Level 3                                             | X | X | X | X | X | X | X | X | X | X |
| Olfactory Epithelium, Basal Cell, Hyperplasia             |   |   |   |   |   |   |   |   |   |   |
| Olfactory Epithelium, Degeneration/Necrosis               |   |   |   |   |   |   |   |   |   |   |
| Respiratory Epithelium, Inflammation                      |   |   |   |   |   |   |   |   |   |   |
| Nose, Level 4                                             | X | X | X | X | X | X | X | X | X | X |
| Olfactory Epithelium, Basal Cell, Hyperplasia             |   |   |   |   |   |   |   |   |   |   |
| Olfactory Epithelium, Degeneration/Necrosis               |   |   |   |   |   |   |   |   |   |   |
| Olfactory Epithelium, Inflammation                        |   |   |   |   |   |   |   |   |   |   |
| Nose, Level 5                                             | X | X | X | X | X | X | X | X | X | X |
| Nasopharyngeal Duct, Goblet Cell, Hypertrophy/Hyperplasia |   |   |   |   |   |   |   |   |   |   |
| Olfactory Epithelium, Basal Cell, Hyperplasia             |   |   |   |   |   |   |   |   |   |   |
| Olfactory Epithelium, Degeneration/Necrosis               |   |   |   |   |   |   |   |   |   |   |

Key : X-Not Remarkable N-No Section I-Incomplete A-Autolysis  
 1-minimal 2-slight/mild 3-moderate 4-moderately severe 5-severe/high  
 P-Present B-Benign M-Malignant  
 m-missing one paired organ u-unscheduled sac./death

# HISTOPATHOLOGY INCIDENCE TABLE

GROUP  
0.1ppm

09001  
Recovery Sacrifice  
Female Rat

A  
N  
I  
M  
A  
L

|                                      |   |   |   |   |   |   |   |   |   |   |  |  |  |  |  |  |  |  |  |  |
|--------------------------------------|---|---|---|---|---|---|---|---|---|---|--|--|--|--|--|--|--|--|--|--|
|                                      | 3 | 3 | 3 | 3 | 3 | 3 | 3 | 3 | 3 | 3 |  |  |  |  |  |  |  |  |  |  |
|                                      | 4 | 4 | 4 | 4 | 5 | 5 | 5 | 5 | 5 | 5 |  |  |  |  |  |  |  |  |  |  |
|                                      | 6 | 7 | 8 | 9 | 0 | 1 | 2 | 3 | 4 | 5 |  |  |  |  |  |  |  |  |  |  |
| Nose, Tip                            |   |   |   | X |   |   | N |   |   |   |  |  |  |  |  |  |  |  |  |  |
| Squamous Epithelium,<br>Hyperplasia  |   |   |   |   |   |   |   |   |   |   |  |  |  |  |  |  |  |  |  |  |
| Squamous Epithelium,<br>Inflammation | 1 | 2 | 1 |   | 1 | 2 |   | 1 | 2 | 1 |  |  |  |  |  |  |  |  |  |  |
|                                      |   |   |   |   |   |   |   |   |   |   |  |  |  |  |  |  |  |  |  |  |
|                                      |   |   |   |   |   |   |   |   |   |   |  |  |  |  |  |  |  |  |  |  |
|                                      |   |   |   |   |   |   |   |   |   |   |  |  |  |  |  |  |  |  |  |  |
|                                      |   |   |   |   |   |   |   |   |   |   |  |  |  |  |  |  |  |  |  |  |
|                                      |   |   |   |   |   |   |   |   |   |   |  |  |  |  |  |  |  |  |  |  |
|                                      |   |   |   |   |   |   |   |   |   |   |  |  |  |  |  |  |  |  |  |  |
|                                      |   |   |   |   |   |   |   |   |   |   |  |  |  |  |  |  |  |  |  |  |
|                                      |   |   |   |   |   |   |   |   |   |   |  |  |  |  |  |  |  |  |  |  |
|                                      |   |   |   |   |   |   |   |   |   |   |  |  |  |  |  |  |  |  |  |  |
|                                      |   |   |   |   |   |   |   |   |   |   |  |  |  |  |  |  |  |  |  |  |
|                                      |   |   |   |   |   |   |   |   |   |   |  |  |  |  |  |  |  |  |  |  |
|                                      |   |   |   |   |   |   |   |   |   |   |  |  |  |  |  |  |  |  |  |  |
|                                      |   |   |   |   |   |   |   |   |   |   |  |  |  |  |  |  |  |  |  |  |
|                                      |   |   |   |   |   |   |   |   |   |   |  |  |  |  |  |  |  |  |  |  |
|                                      |   |   |   |   |   |   |   |   |   |   |  |  |  |  |  |  |  |  |  |  |
|                                      |   |   |   |   |   |   |   |   |   |   |  |  |  |  |  |  |  |  |  |  |
|                                      |   |   |   |   |   |   |   |   |   |   |  |  |  |  |  |  |  |  |  |  |

Key : X=Not Remarkable N=No Section I=Incomplete A=Autolysis  
 1=minimal 2=slight/mild 3=moderate 4=moderately severe 5=severe/high  
 P=Present B=Benign M=Malignant  
 m=missing one paired organ u=unscheduled sac./death

# HISTOPATHOLOGY INCIDENCE TABLE

GROUP  
1.0ppm

09001  
Recovery Sacrifice  
Female Rat

A  
N  
I  
M  
A  
L

|                                                           | 3 | 3 | 3 | 3 | 3 | 3 | 3 | 3 | 3 | 3 |
|-----------------------------------------------------------|---|---|---|---|---|---|---|---|---|---|
|                                                           | 8 | 8 | 8 | 8 | 8 | 8 | 8 | 8 | 8 | 9 |
|                                                           | 1 | 2 | 3 | 4 | 5 | 6 | 7 | 8 | 9 | 0 |
| Nose, Level 1                                             |   |   | X |   |   |   |   |   |   |   |
| Transitional/Respiratory Epithelium, Hyperplasia          |   |   |   |   |   |   |   |   |   |   |
| Transitional/Respiratory Epithelium, Inflammation         | 1 | 2 |   | 3 | 1 | 1 | 1 | 1 | 2 | 3 |
| Nose, Level 2                                             | X | X | X | X | X | X | X | X | X | X |
| Olfactory Epithelium, Basal Cell, Hyperplasia             |   |   |   |   |   |   |   |   |   |   |
| Olfactory Epithelium, Degeneration/Necrosis               |   |   |   |   |   |   |   |   |   |   |
| Transitional/Respiratory Epithelium, Hyperplasia          |   |   |   |   |   |   |   |   |   |   |
| Transitional/Respiratory Epithelium, Inflammation         |   |   |   |   |   |   |   |   |   |   |
| Nose, Level 3                                             | X | X | X | X | X | X | X | X | X | X |
| Olfactory Epithelium, Basal Cell, Hyperplasia             |   |   |   |   |   |   |   |   |   |   |
| Olfactory Epithelium, Degeneration/Necrosis               |   |   |   |   |   |   |   |   |   |   |
| Respiratory Epithelium, Inflammation                      |   |   |   |   |   |   |   |   |   |   |
| Nose, Level 4                                             | X | X | X | X | X | X | X | X | X | X |
| Olfactory Epithelium, Basal Cell, Hyperplasia             |   |   |   |   |   |   |   |   |   |   |
| Olfactory Epithelium, Degeneration/Necrosis               |   |   |   |   |   |   |   |   |   |   |
| Olfactory Epithelium, Inflammation                        |   |   |   |   |   |   |   |   |   |   |
| Nose, Level 5                                             | X | X | X | X | X | X | X | X | X | X |
| Nasopharyngeal Duct, Goblet Cell, Hypertrophy/Hyperplasia |   |   |   |   |   |   |   |   |   |   |
| Olfactory Epithelium, Basal Cell, Hyperplasia             |   |   |   |   |   |   |   |   |   |   |
| Olfactory Epithelium, Degeneration/Necrosis               |   |   |   |   |   |   |   |   |   |   |

Key : X=Not Remarkable N=No Section I=Incomplete A=Autolysis  
 1=minimal 2=slight/mild 3=moderate 4=moderately severe 5=severe/high  
 P=Present B=Benign M=Malignant  
 m=missing one paired organ u=unscheduled sac./death





# HISTOPATHOLOGY INCIDENCE TABLE

GROUP  
10ppm

09001  
Recovery Sacrifice  
Female Rat

A  
N  
I  
M  
A  
L

|                                                           | 1 | 2 | 3 | 4 | 5 | 6 | 7 | 8 | 9 | 10 | 11 | 12 | 13 | 14 | 15 | 16 | 17 | 18 | 19 | 20 |
|-----------------------------------------------------------|---|---|---|---|---|---|---|---|---|----|----|----|----|----|----|----|----|----|----|----|
|                                                           | 4 | 4 | 4 | 4 | 4 | 4 | 4 | 4 | 4 | 4  | 4  | 4  | 4  | 4  | 4  |    |    |    |    |    |
|                                                           | 1 | 1 | 1 | 1 | 2 | 2 | 2 | 2 | 2 | 2  | 2  | 2  | 2  | 2  | 2  |    |    |    |    |    |
|                                                           | 6 | 7 | 8 | 9 | 0 | 1 | 2 | 3 | 4 | 5  |    |    |    |    |    |    |    |    |    |    |
| Nose, Level 1                                             |   |   |   |   |   |   |   |   |   |    |    |    |    |    |    |    |    |    |    |    |
| Transitional/Respiratory Epithelium, Hyperplasia          |   |   |   |   |   |   |   |   |   |    |    |    |    |    |    |    |    |    |    |    |
| Transitional/Respiratory Epithelium, Inflammation         | 3 | 3 | 2 | 1 | 1 | 1 | 1 | 2 | 2 | 1  |    |    |    |    |    |    |    |    |    |    |
| Nose, Level 2                                             |   |   |   |   |   | X | X |   |   | X  |    |    |    |    |    |    |    |    |    |    |
| Olfactory Epithelium, Basal Cell, Hyperplasia             | 1 | 1 |   | 1 | 1 |   |   |   |   | 1  | 1  |    |    |    |    |    |    |    |    |    |
| Olfactory Epithelium, Degeneration/Necrosis               | 1 |   |   | 1 | 1 |   |   |   |   | 1  | 2  |    |    |    |    |    |    |    |    |    |
| Transitional/Respiratory Epithelium, Hyperplasia          |   |   |   |   |   |   |   |   |   |    |    |    |    |    |    |    |    |    |    |    |
| Transitional/Respiratory Epithelium, Inflammation         | 2 |   | 2 |   | 2 |   |   |   |   | 2  |    |    |    |    |    |    |    |    |    |    |
| Nose, Level 3                                             |   |   |   |   |   |   |   |   |   |    |    |    |    |    |    |    |    |    |    |    |
| Olfactory Epithelium, Basal Cell, Hyperplasia             | 1 | 1 | 1 | 1 | 1 | 1 | 1 | 1 | 1 | 1  | 1  | 2  |    |    |    |    |    |    |    |    |
| Olfactory Epithelium, Degeneration/Necrosis               |   | 1 | 1 | 1 | 1 |   |   |   |   | 1  | 1  | 1  | 1  |    |    |    |    |    |    |    |
| Respiratory Epithelium, Inflammation                      |   |   |   |   |   |   |   |   |   |    |    |    |    |    |    |    |    |    |    |    |
| Nose, Level 4                                             |   |   |   |   |   |   |   |   |   |    |    |    |    |    |    |    |    |    |    |    |
| Olfactory Epithelium, Basal Cell, Hyperplasia             | 1 | 1 | 1 | 1 | 1 | 1 | 1 | 1 | 1 | 1  | 1  | 2  |    |    |    |    |    |    |    |    |
| Olfactory Epithelium, Degeneration/Necrosis               |   | 1 | 1 |   | 1 |   |   |   |   | 1  | 1  | 1  | 1  |    |    |    |    |    |    |    |
| Olfactory Epithelium, Inflammation                        |   |   |   |   |   |   |   |   |   |    |    |    |    |    |    |    |    |    |    |    |
| Nose, Level 5                                             |   |   |   | X | X | X |   |   |   | X  |    |    |    |    |    |    |    |    |    |    |
| Nasopharyngeal Duct, Goblet Cell, Hypertrophy/Hyperplasia |   |   |   |   |   |   |   |   |   |    |    |    |    |    |    |    |    |    |    |    |
| Olfactory Epithelium, Basal Cell, Hyperplasia             | 1 | 1 | 1 |   |   |   |   |   |   | 1  | 1  |    | 1  |    |    |    |    |    |    |    |
| Olfactory Epithelium, Degeneration/Necrosis               |   | 1 | 1 |   |   |   |   |   |   |    |    |    |    |    |    |    |    |    |    |    |

Key : X=Not Remarkable N=No Section I=Incomplete A=Autolysis  
 1=minimal 2=slight/mild 3=moderate 4=moderately severe 5=severe/high  
 P=Present B=Benign M=Malignant  
 m=missing one paired organ u=unscheduled sac./death

HISTOPATHOLOGY INCIDENCE TABLE

GROUP  
10ppm

09001  
Recovery Sacrifice  
Female Rat

A  
N  
I  
M  
A  
L

|                                      |   |   |   |   |   |   |   |   |   |   |  |  |  |  |  |  |  |  |  |  |  |  |  |  |
|--------------------------------------|---|---|---|---|---|---|---|---|---|---|--|--|--|--|--|--|--|--|--|--|--|--|--|--|
|                                      | 4 | 4 | 4 | 4 | 4 | 4 | 4 | 4 | 4 | 4 |  |  |  |  |  |  |  |  |  |  |  |  |  |  |
|                                      | 1 | 1 | 1 | 1 | 2 | 2 | 2 | 2 | 2 | 2 |  |  |  |  |  |  |  |  |  |  |  |  |  |  |
|                                      | 6 | 7 | 8 | 9 | 0 | 1 | 2 | 3 | 4 | 5 |  |  |  |  |  |  |  |  |  |  |  |  |  |  |
| Nose, Tip                            |   |   |   |   |   |   |   |   |   |   |  |  |  |  |  |  |  |  |  |  |  |  |  |  |
| Squamous Epithelium,<br>Hyperplasia  |   |   |   |   |   |   |   |   |   |   |  |  |  |  |  |  |  |  |  |  |  |  |  |  |
| Squamous Epithelium,<br>Inflammation | 3 | 2 | 1 | 1 | 1 | 1 | 1 | 2 | 1 | 1 |  |  |  |  |  |  |  |  |  |  |  |  |  |  |
|                                      |   |   |   |   |   |   |   |   |   |   |  |  |  |  |  |  |  |  |  |  |  |  |  |  |
|                                      |   |   |   |   |   |   |   |   |   |   |  |  |  |  |  |  |  |  |  |  |  |  |  |  |
|                                      |   |   |   |   |   |   |   |   |   |   |  |  |  |  |  |  |  |  |  |  |  |  |  |  |
|                                      |   |   |   |   |   |   |   |   |   |   |  |  |  |  |  |  |  |  |  |  |  |  |  |  |
|                                      |   |   |   |   |   |   |   |   |   |   |  |  |  |  |  |  |  |  |  |  |  |  |  |  |
|                                      |   |   |   |   |   |   |   |   |   |   |  |  |  |  |  |  |  |  |  |  |  |  |  |  |
|                                      |   |   |   |   |   |   |   |   |   |   |  |  |  |  |  |  |  |  |  |  |  |  |  |  |
|                                      |   |   |   |   |   |   |   |   |   |   |  |  |  |  |  |  |  |  |  |  |  |  |  |  |
|                                      |   |   |   |   |   |   |   |   |   |   |  |  |  |  |  |  |  |  |  |  |  |  |  |  |
|                                      |   |   |   |   |   |   |   |   |   |   |  |  |  |  |  |  |  |  |  |  |  |  |  |  |
|                                      |   |   |   |   |   |   |   |   |   |   |  |  |  |  |  |  |  |  |  |  |  |  |  |  |
|                                      |   |   |   |   |   |   |   |   |   |   |  |  |  |  |  |  |  |  |  |  |  |  |  |  |
|                                      |   |   |   |   |   |   |   |   |   |   |  |  |  |  |  |  |  |  |  |  |  |  |  |  |
|                                      |   |   |   |   |   |   |   |   |   |   |  |  |  |  |  |  |  |  |  |  |  |  |  |  |
|                                      |   |   |   |   |   |   |   |   |   |   |  |  |  |  |  |  |  |  |  |  |  |  |  |  |

Key : X=Not Remarkable N=No Section I=Incomplete A=Autolysis  
1=minimal 2=slight/mild 3=moderate 4=moderately severe 5=severe/high  
P=Present B=Benign M=Malignant  
m=missing one paired organ u=unscheduled sac./death

# HISTOPATHOLOGY INCIDENCE TABLE

GROUP  
30ppm

09001  
Recovery Sacrifice  
Female Rat

A  
N  
:  
M  
A  
L

|                                                           | 4 | 4 | 4 | 4 | 4 | 4 | 4 | 4 | 4 | 4 |
|-----------------------------------------------------------|---|---|---|---|---|---|---|---|---|---|
|                                                           | 5 | 5 | 5 | 5 | 5 | 5 | 5 | 5 | 5 | 6 |
|                                                           | 1 | 2 | 3 | 4 | 5 | 6 | 7 | 8 | 9 | 0 |
| Nose, Level 1                                             |   |   |   |   |   |   |   |   |   |   |
| Transitional/Respiratory Epithelium, Hyperplasia          |   |   |   |   |   |   |   |   |   |   |
| Transitional/Respiratory Epithelium, Inflammation         | 1 | 2 | 1 | 1 | 3 | 1 | 1 | 2 | 2 | 1 |
| Nose, Level 2                                             |   |   |   |   |   | X |   |   |   |   |
| Olfactory Epithelium, Basal Cell, Hyperplasia             | 2 | 1 | 2 | 2 | 2 |   | 3 |   | 1 | 2 |
| Olfactory Epithelium, Degeneration/Necrosis               | 2 | 1 | 2 | 2 | 2 |   | 2 |   | 1 | 1 |
| Transitional/Respiratory Epithelium, Hyperplasia          |   |   |   |   |   |   |   |   |   |   |
| Transitional/Respiratory Epithelium, Inflammation         | 1 |   |   | 2 | 2 |   |   | 2 | 2 |   |
| Nose, Level 3                                             |   |   |   |   |   |   |   |   |   |   |
| Olfactory Epithelium, Basal Cell, Hyperplasia             | 2 | 1 | 2 | 2 | 3 | 2 | 2 | 2 | 2 | 2 |
| Olfactory Epithelium, Degeneration/Necrosis               | 2 | 1 | 1 | 1 | 2 | 2 | 2 | 2 | 1 | 2 |
| Respiratory Epithelium, Inflammation                      |   |   |   |   |   |   |   |   |   |   |
| Nose, Level 4                                             |   |   |   |   |   |   |   |   |   |   |
| Olfactory Epithelium, Basal Cell, Hyperplasia             | 2 | 2 | 2 | 2 | 2 | 2 | 2 | 2 | 2 | 2 |
| Olfactory Epithelium, Degeneration/Necrosis               | 2 | 1 | 1 | 1 | 2 | 2 | 2 | 1 | 2 | 2 |
| Olfactory Epithelium, Inflammation                        |   |   |   |   |   |   |   |   |   |   |
| Nose, Level 5                                             |   |   |   |   |   |   |   |   |   |   |
| Nasopharyngeal Duct, Goblet Cell, Hypertrophy/Hyperplasia |   | 1 |   |   |   | 1 | 1 |   |   |   |
| Olfactory Epithelium, Basal Cell, Hyperplasia             | 2 | 1 | 2 | 2 | 1 | 1 | 2 | 2 | 2 | 1 |
| Olfactory Epithelium, Degeneration/Necrosis               | 2 | 1 | 1 | 1 | 1 |   | 1 | 1 |   |   |

# HISTOPATHOLOGY INCIDENCE TABLE

GROUP  
30ppm

09001  
Recovery Sacrifice  
Female Rat

A  
N  
I  
M  
A  
L

|                                      | 4 | 4 | 4 | 4 | 4 | 4 | 4 | 4 | 4 | 4 |
|--------------------------------------|---|---|---|---|---|---|---|---|---|---|
|                                      | 5 | 5 | 5 | 5 | 5 | 5 | 5 | 5 | 5 | 6 |
|                                      | 1 | 2 | 3 | 4 | 5 | 6 | 7 | 8 | 9 | 0 |
| Nose, Tip                            |   |   | X |   |   |   |   |   |   | X |
| Squamous Epithelium,<br>Hyperplasia  |   |   |   |   |   |   |   |   |   |   |
| Squamous Epithelium,<br>Inflammation | 1 | 1 |   | 1 | 2 | 1 | 1 | 2 | 1 |   |
|                                      |   |   |   |   |   |   |   |   |   |   |
|                                      |   |   |   |   |   |   |   |   |   |   |
|                                      |   |   |   |   |   |   |   |   |   |   |
|                                      |   |   |   |   |   |   |   |   |   |   |
|                                      |   |   |   |   |   |   |   |   |   |   |
|                                      |   |   |   |   |   |   |   |   |   |   |
|                                      |   |   |   |   |   |   |   |   |   |   |
|                                      |   |   |   |   |   |   |   |   |   |   |
|                                      |   |   |   |   |   |   |   |   |   |   |
|                                      |   |   |   |   |   |   |   |   |   |   |
|                                      |   |   |   |   |   |   |   |   |   |   |
|                                      |   |   |   |   |   |   |   |   |   |   |
|                                      |   |   |   |   |   |   |   |   |   |   |
|                                      |   |   |   |   |   |   |   |   |   |   |
|                                      |   |   |   |   |   |   |   |   |   |   |
|                                      |   |   |   |   |   |   |   |   |   |   |
|                                      |   |   |   |   |   |   |   |   |   |   |
|                                      |   |   |   |   |   |   |   |   |   |   |
|                                      |   |   |   |   |   |   |   |   |   |   |
|                                      |   |   |   |   |   |   |   |   |   |   |
|                                      |   |   |   |   |   |   |   |   |   |   |
|                                      |   |   |   |   |   |   |   |   |   |   |
|                                      |   |   |   |   |   |   |   |   |   |   |
|                                      |   |   |   |   |   |   |   |   |   |   |
|                                      |   |   |   |   |   |   |   |   |   |   |
|                                      |   |   |   |   |   |   |   |   |   |   |
|                                      |   |   |   |   |   |   |   |   |   |   |
|                                      |   |   |   |   |   |   |   |   |   |   |
|                                      |   |   |   |   |   |   |   |   |   |   |
|                                      |   |   |   |   |   |   |   |   |   |   |
|                                      |   |   |   |   |   |   |   |   |   |   |
|                                      |   |   |   |   |   |   |   |   |   |   |

Key : X-Not Remarkable N-No Section I-Incomplete A-Autolysis  
 1-minimal 2-slight/mild 3-moderate 4-moderately severe 5-severe/high  
 P-Present B-Benign M-Malignant  
 m-missing one paired organ u-unscheduled sac./death

Dose-response Data and BMD Curves from NTP 2-year Rat Study  
(NTP, 2000)

NTP Data Available at:

<http://ntp.niehs.nih.gov/results/pubs/longterm/reports/longterm/tr500580/listedreports/tr500/index.html>

**Female Olfactory Epithelial Hyperplasia (f\_oe\_h\_md4) from the 2-year NTP (2000) Study**

| <b>Conc (ppm)</b> | <b>Amt Mtb (nmol/min-g)</b> | <b>Number</b> | <b>Effect</b> |
|-------------------|-----------------------------|---------------|---------------|
| 0                 | 0.000                       | 49            | 0             |
| 10                | 10.219                      | 49            | 48            |
| 30                | 19.383                      | 49            | 48            |
| 60                | 25.966                      | 49            | 43            |

**Male Respiratory Epithelial Hyperplasia (m\_reh\_md4) from the 2-year NTP (2000) Study**

| <b>Conc (ppm)</b> | <b>Amt Mtb (nmol/min-g)</b> | <b>Number</b> | <b>Effect</b> |
|-------------------|-----------------------------|---------------|---------------|
| 0                 | 0.000                       | 49            | 3             |
| 10                | 7.123                       | 49            | 21            |
| 30                | 7.548                       | 48            | 29            |
| 60                | 8.492                       | 48            | 29            |

### A: Gamma\_f\_oed\_md4\_Gam-BMR10-Restrict

Gamma Multi-Hit Model, with BMR of 10% Extra Risk for the BMD and 0.95 Lower Confidence Limit for the

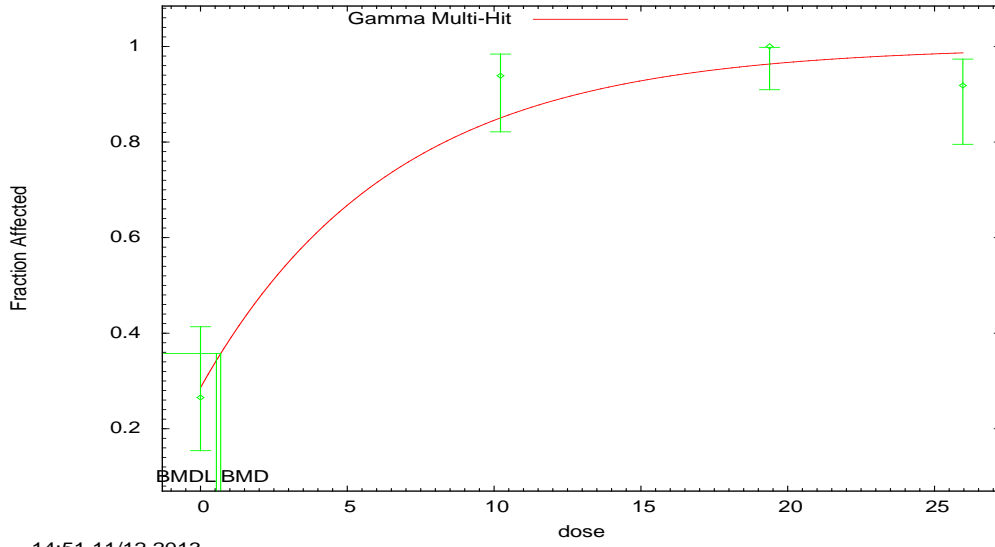

14:51 11/12 2013

### B: Logistic\_f\_oed\_md4\_Log-BMR10

Logistic Model, with BMR of 10% Extra Risk for the BMD and 0.95 Lower Confidence Limit for the BM

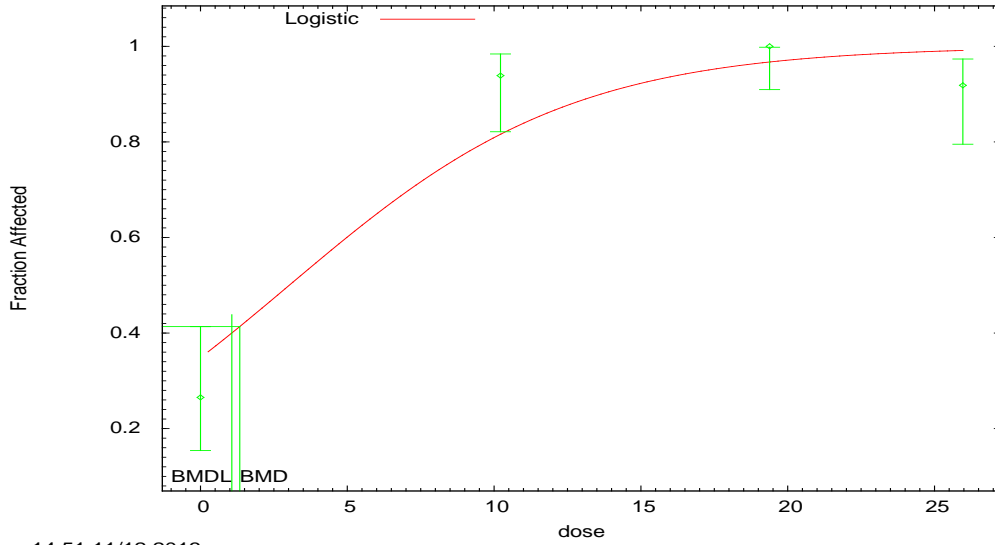

14:51 11/12 2013

### C: LogLogistic\_f\_oed\_md4\_Lnl-BMR10-Restrict

Log-Logistic Model, with BMR of 10% Extra Risk for the BMD and 0.95 Lower Confidence Limit for the E

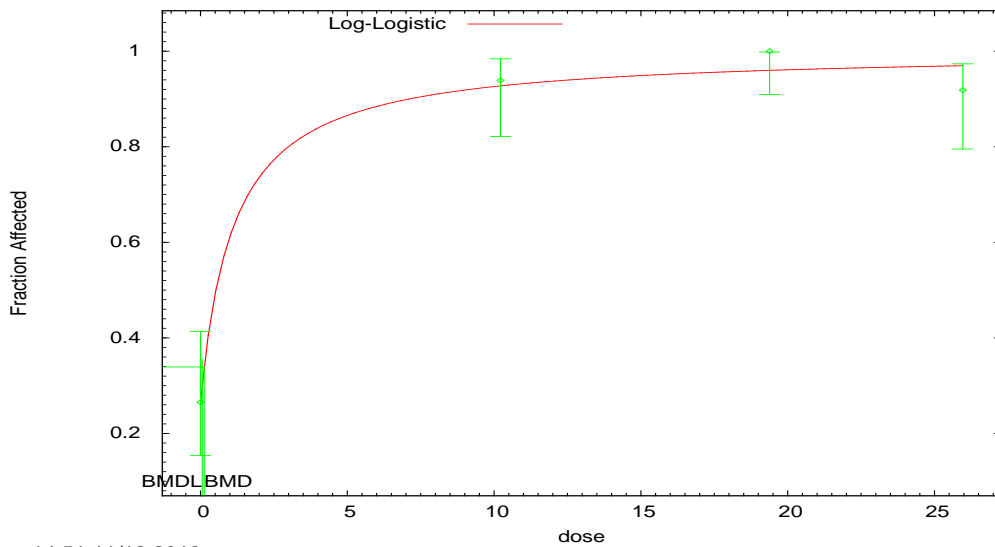

14:51 11/12 2013

**D: Probit\_f\_oed\_md4\_Pro-BMR10**

Probit Model, with BMR of 10% Extra Risk for the BMD and 0.95 Lower Confidence Limit for the BMD

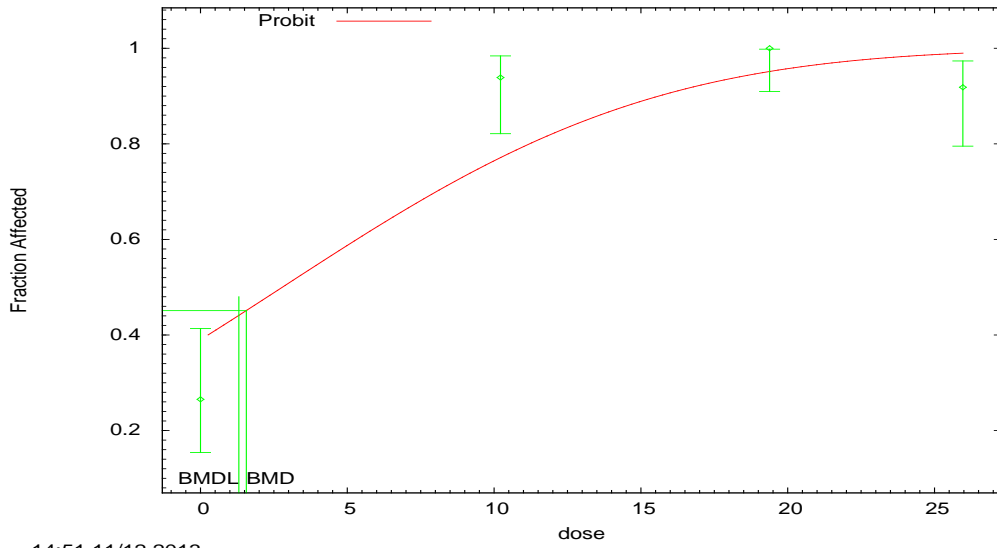

14:51 11/12 2013

**E: LogProbit\_f\_oed\_md4\_Lnp-BMR10-Restrict**

LogProbit Model, with BMR of 10% Extra Risk for the BMD and 0.95 Lower Confidence Limit for the BMD

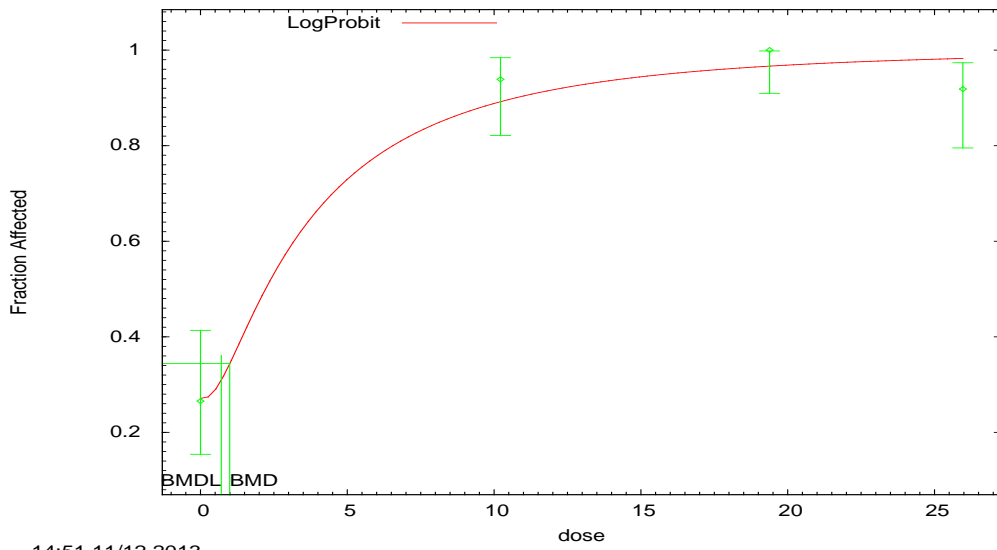

14:51 11/12 2013

**F: Multistage\_f\_oed\_md4\_Mst2-BMR10-Restrict**

Multistage Model, with BMR of 10% Extra Risk for the BMD and 0.95 Lower Confidence Limit for the BMD

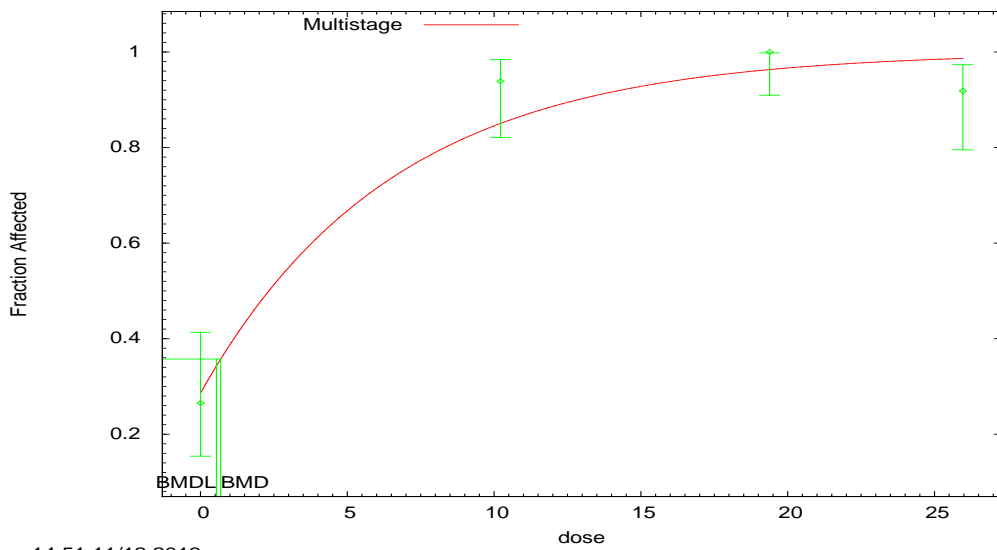

14:51 11/12 2013



### G: Weibull\_f\_oed\_md4\_Wei-BMR10-Restrict

Weibull Model, with BMR of 10% Extra Risk for the BMD and 0.95 Lower Confidence Limit for the BM

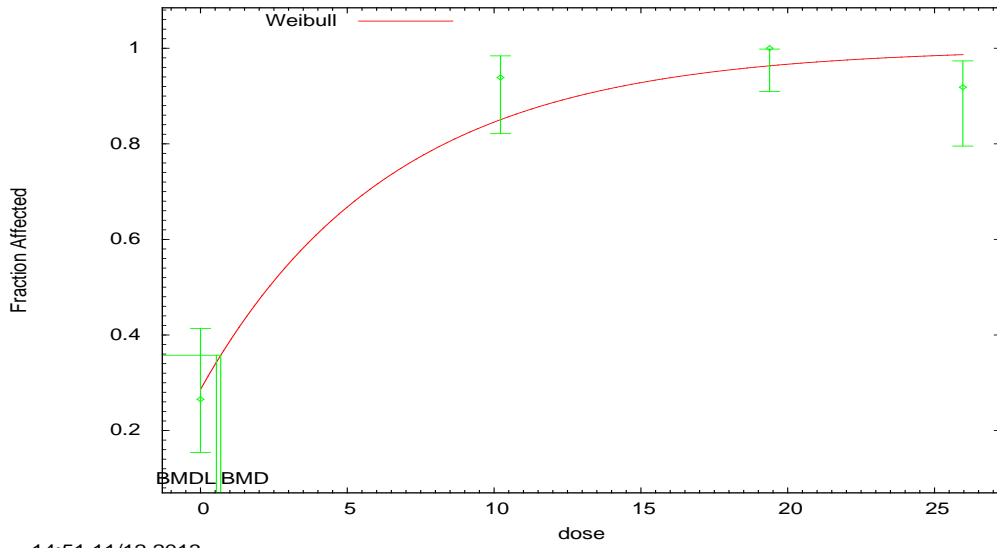

14:51 11/12 2013

### H: Quantal-Linear\_f\_oed\_md4\_Qln-BMR10

Quantal Linear Model, with BMR of 10% Extra Risk for the BMD and 0.95 Lower Confidence Limit for the

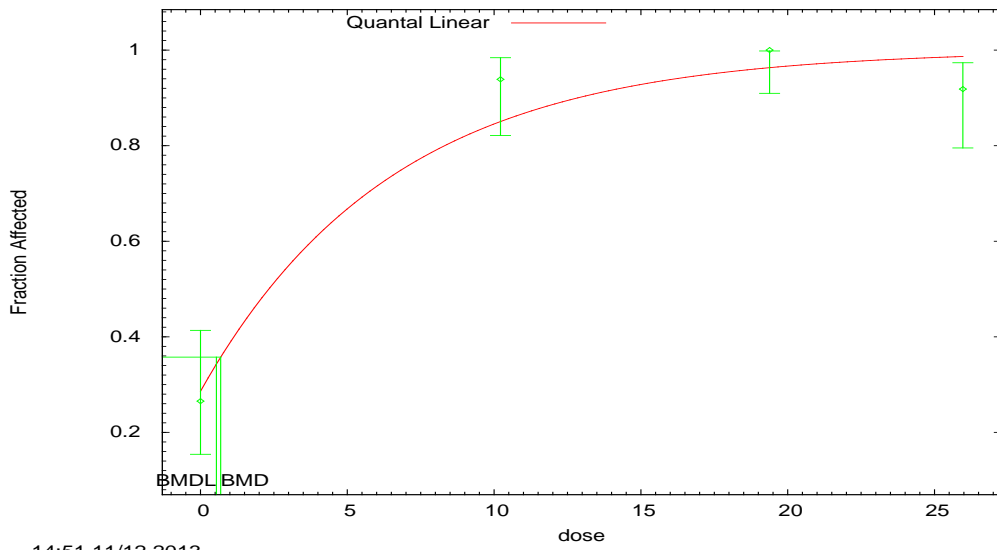

14:51 11/12 2013

### A: Gamma\_f\_oe\_h\_md4\_Gam-BMR10-Restrict

Gamma Multi-Hit Model, with BMR of 10% Extra Risk for the BMD and 0.95 Lower Confidence Limit for the

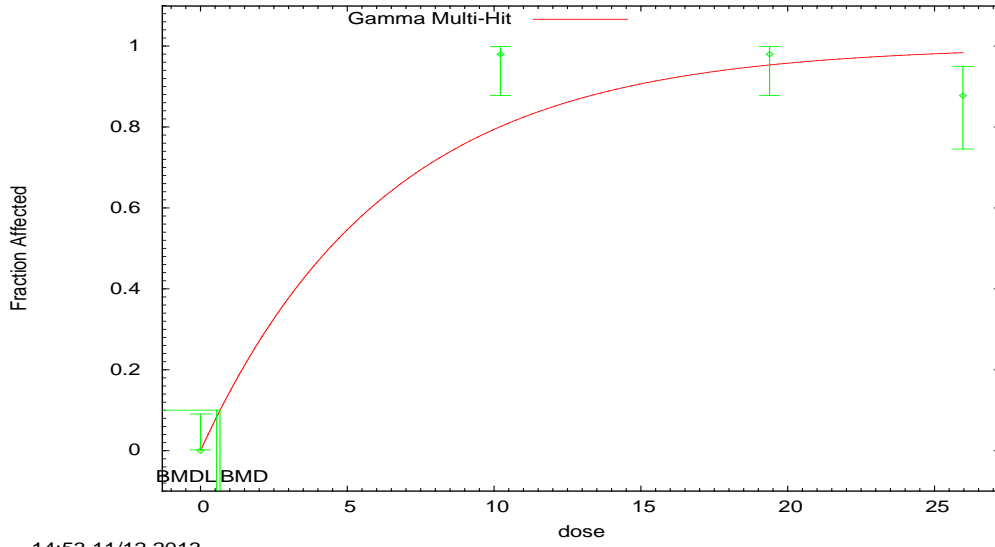

14:53 11/12 2013

### B: Logistic\_f\_oe\_h\_md4\_Log-BMR10

Logistic Model, with BMR of 10% Extra Risk for the BMD and 0.95 Lower Confidence Limit for the BM

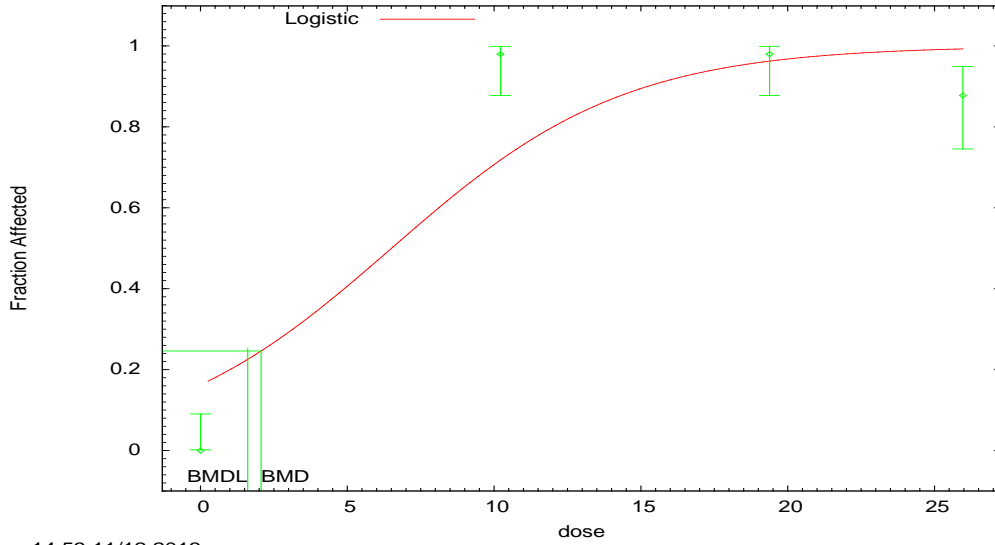

14:53 11/12 2013

### C: LogLogistic\_f\_oe\_h\_md4\_Lnl-BMR10-Restrict

Log-Logistic Model, with BMR of 10% Extra Risk for the BMD and 0.95 Lower Confidence Limit for the E

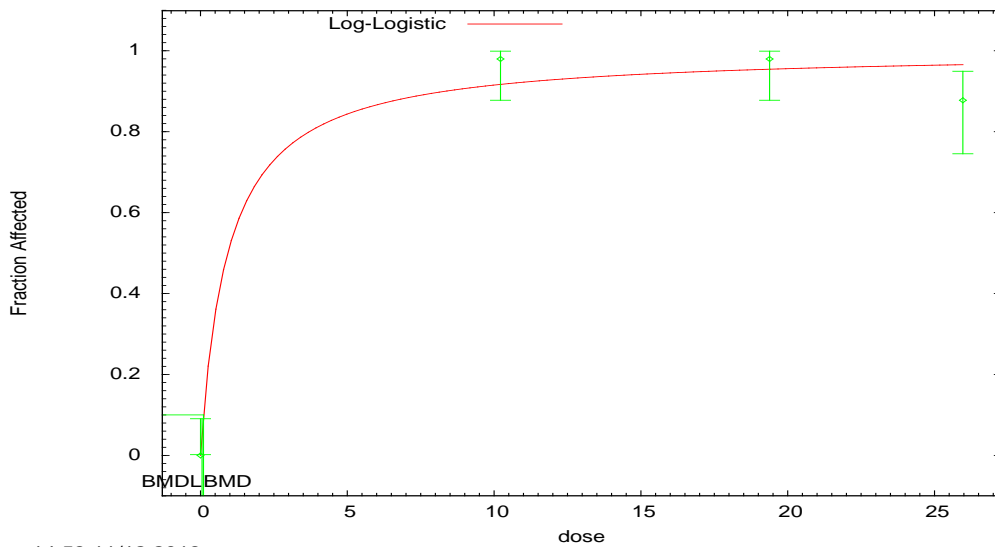

14:53 11/12 2013

**D: Probit\_f\_oe\_h\_md4\_Pro-BMR10**

Probit Model, with BMR of 10% Extra Risk for the BMD and 0.95 Lower Confidence Limit for the BMD

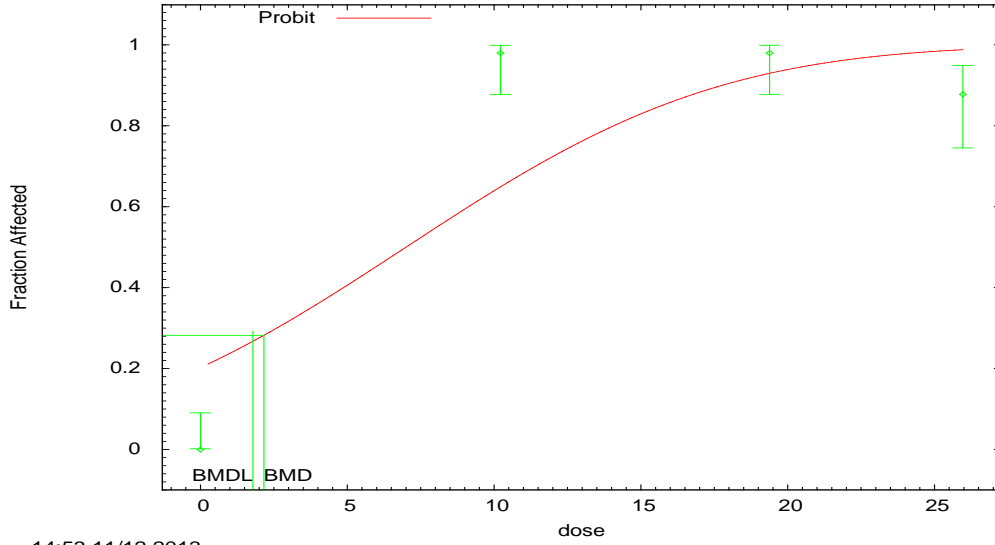

14:53 11/12 2013

**E: LogProbit\_f\_oe\_h\_md4\_Lnp-BMR10-Restrict**

LogProbit Model, with BMR of 10% Extra Risk for the BMD and 0.95 Lower Confidence Limit for the BMD

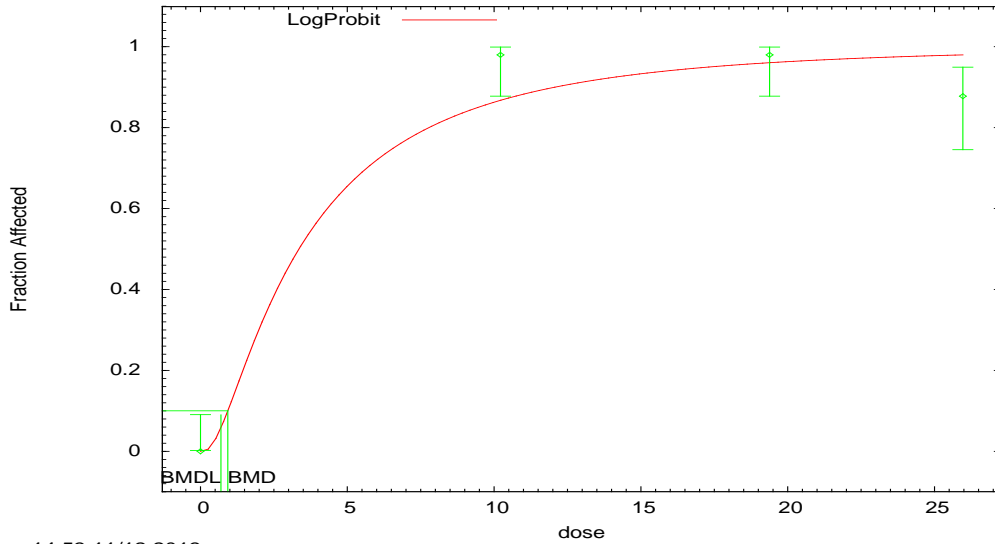

14:53 11/12 2013

**F: Multistage\_f\_oe\_h\_md4\_Mst2-BMR10-Restrict**

Multistage Model, with BMR of 10% Extra Risk for the BMD and 0.95 Lower Confidence Limit for the BMD

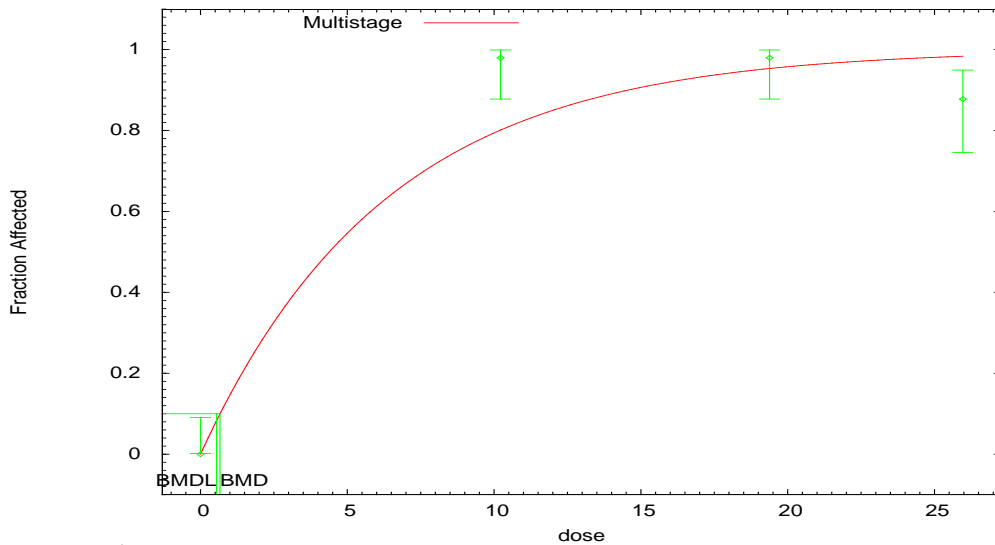

14:53 11/12 2013

**G: Weibull\_f\_oh\_md4\_Wei-BMR10-Restrict**

Weibull Model, with BMR of 10% Extra Risk for the BMD and 0.95 Lower Confidence Limit for the BM

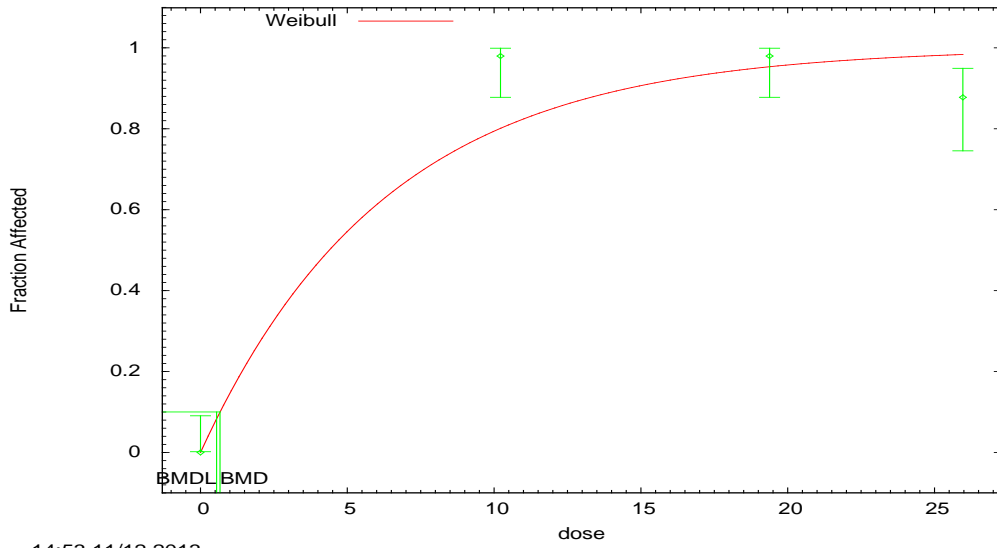

14:53 11/12 2013

**H: Quantal-Linear\_f\_oh\_md4\_Qln-BMR10**

Quantal Linear Model, with BMR of 10% Extra Risk for the BMD and 0.95 Lower Confidence Limit for the

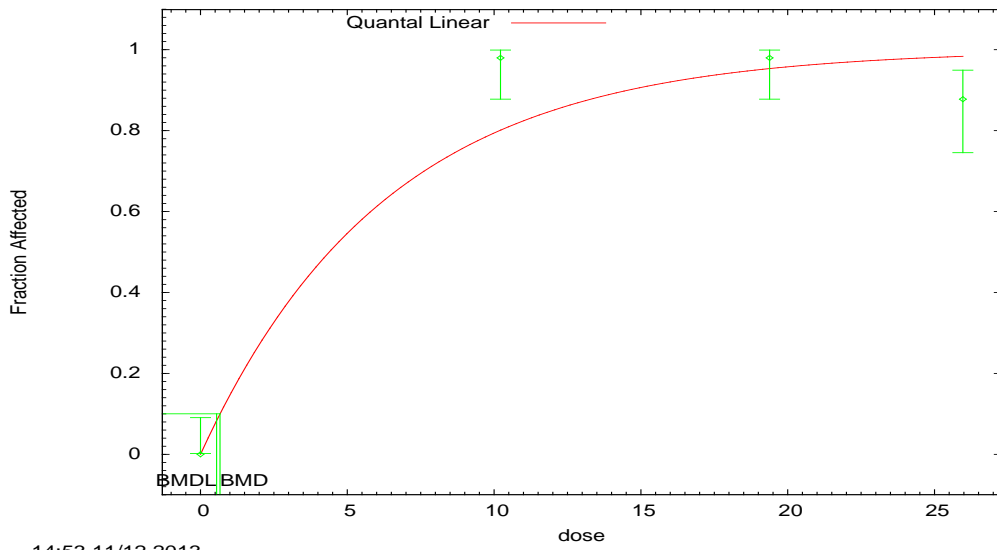

14:53 11/12 2013

### A: Gamma\_f\_red\_md4\_Gam-BMR10-Restrict

Gamma Multi-Hit Model, with BMR of 10% Extra Risk for the BMD and 0.95 Lower Confidence Limit for the

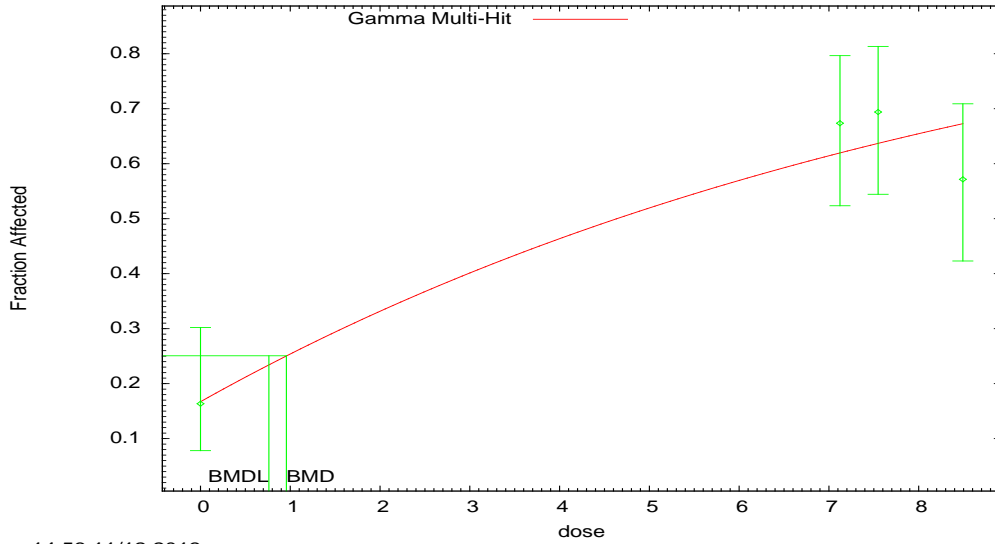

14:56 11/12 2013

### B: Logistic\_f\_red\_md4\_Log-BMR10

Logistic Model, with BMR of 10% Extra Risk for the BMD and 0.95 Lower Confidence Limit for the BM

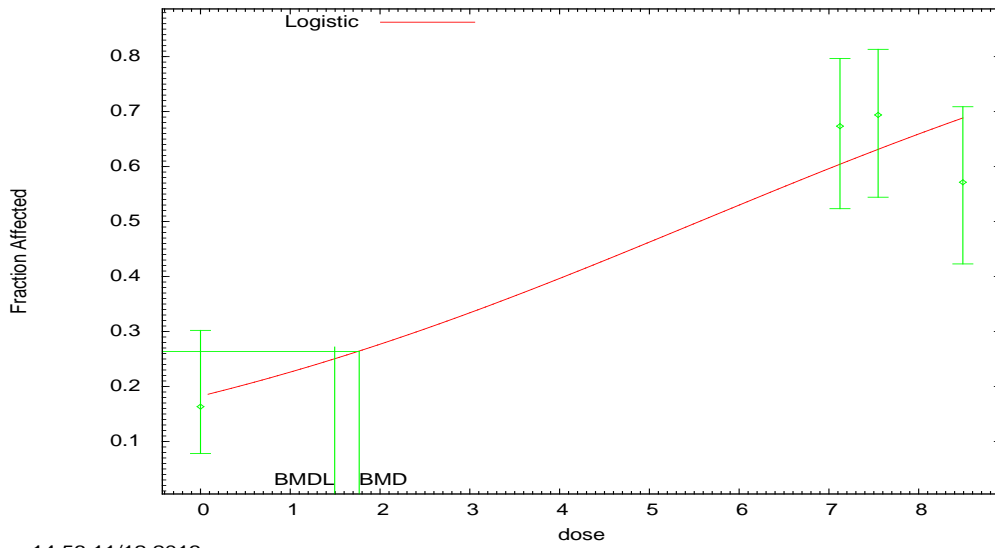

14:56 11/12 2013

### C: LogLogistic\_f\_red\_md4\_Lnl-BMR10-Restrict

Log-Logistic Model, with BMR of 10% Extra Risk for the BMD and 0.95 Lower Confidence Limit for the E

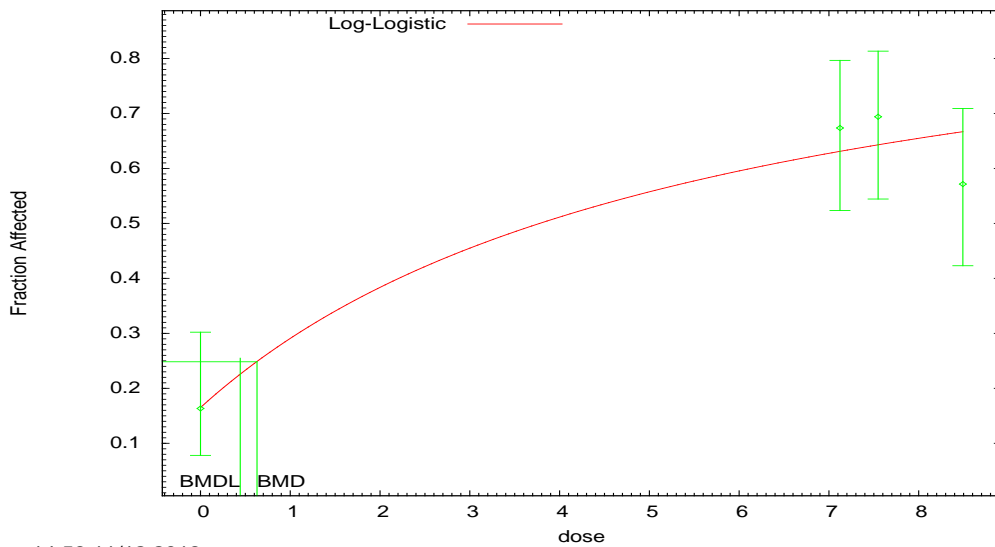

14:56 11/12 2013

**D: Probit\_f\_red\_md4\_Pro-BMR10**

Probit Model, with BMR of 10% Extra Risk for the BMD and 0.95 Lower Confidence Limit for the BMD

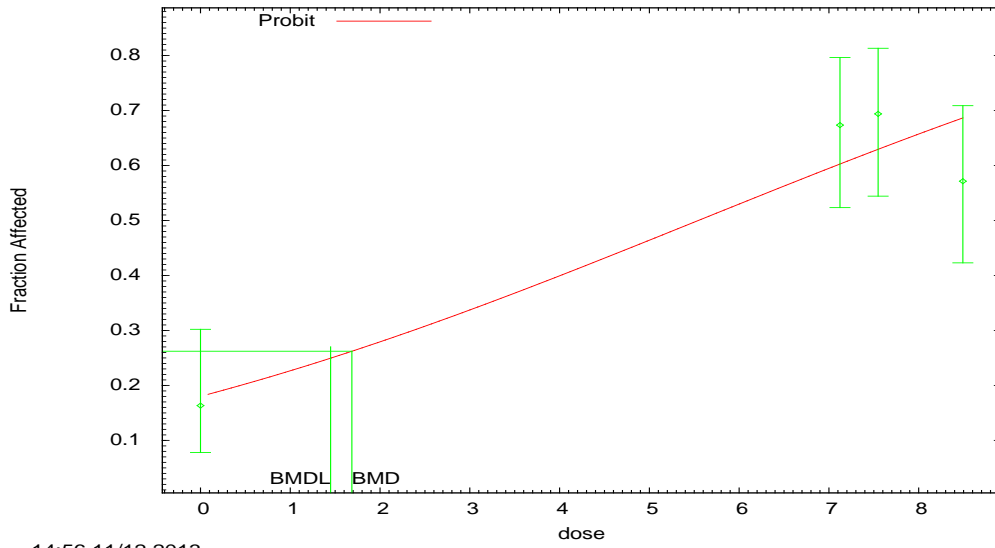

14:56 11/12 2013

**E: LogProbit\_f\_red\_md4\_Lnp-BMR10-Restrict**

LogProbit Model, with BMR of 10% Extra Risk for the BMD and 0.95 Lower Confidence Limit for the BMD

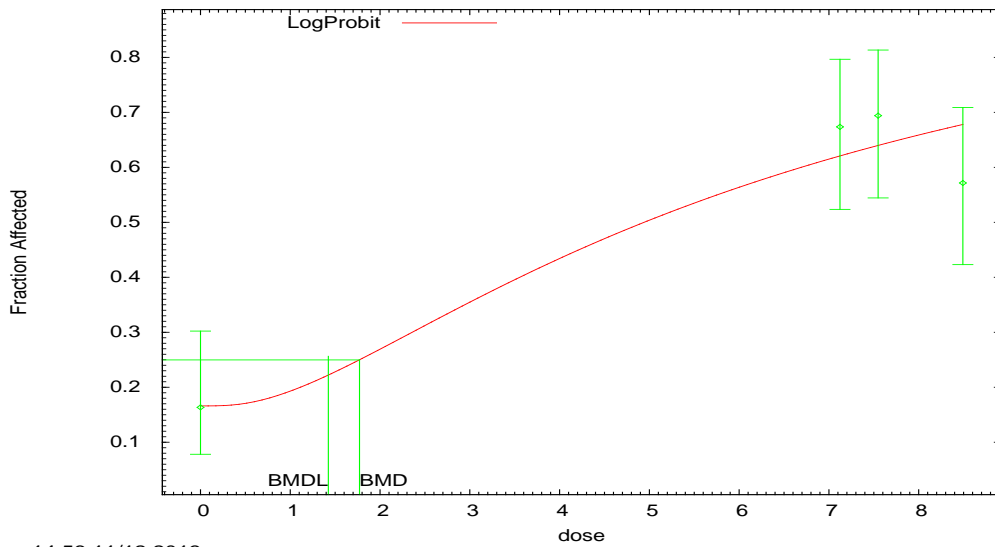

14:56 11/12 2013

**F: Multistage\_f\_red\_md4\_Mst2-BMR10-Restrict**

Multistage Model, with BMR of 10% Extra Risk for the BMD and 0.95 Lower Confidence Limit for the BMD

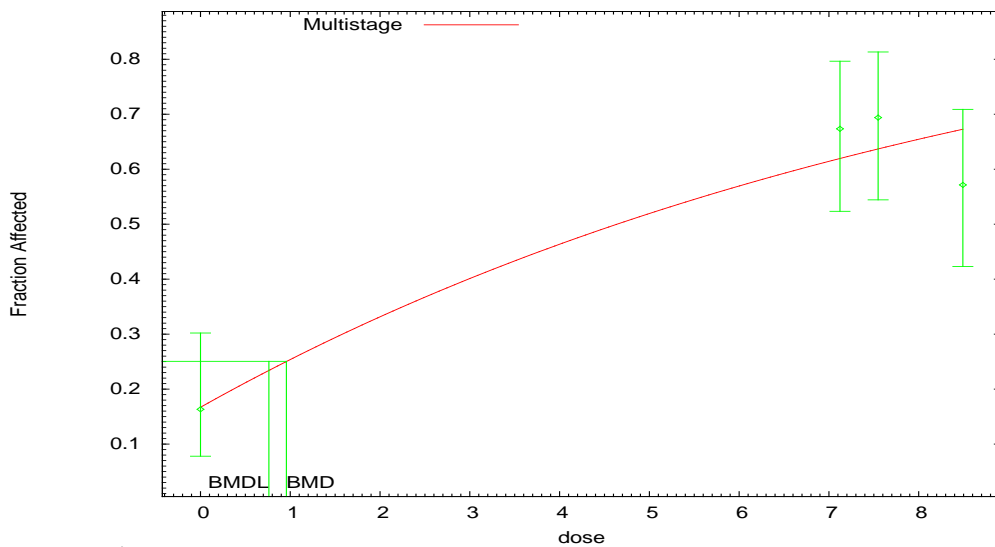

14:56 11/12 2013

### G: Weibull\_f\_red\_md4\_Wei-BMR10-Restrict

Weibull Model, with BMR of 10% Extra Risk for the BMD and 0.95 Lower Confidence Limit for the BM

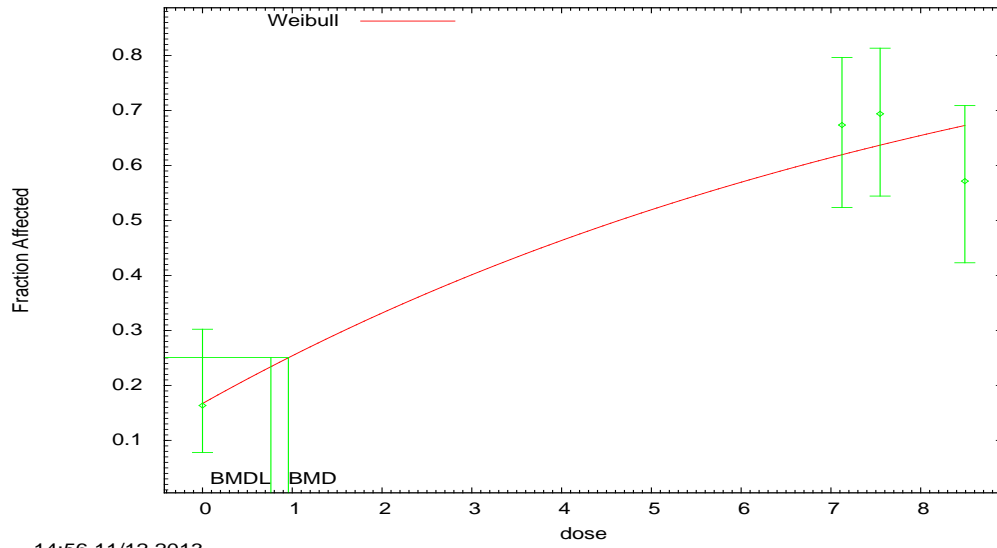

14:56 11/12 2013

### H: Quantal-Linear\_f\_red\_md4\_Qln-BMR10

Quantal Linear Model, with BMR of 10% Extra Risk for the BMD and 0.95 Lower Confidence Limit for the

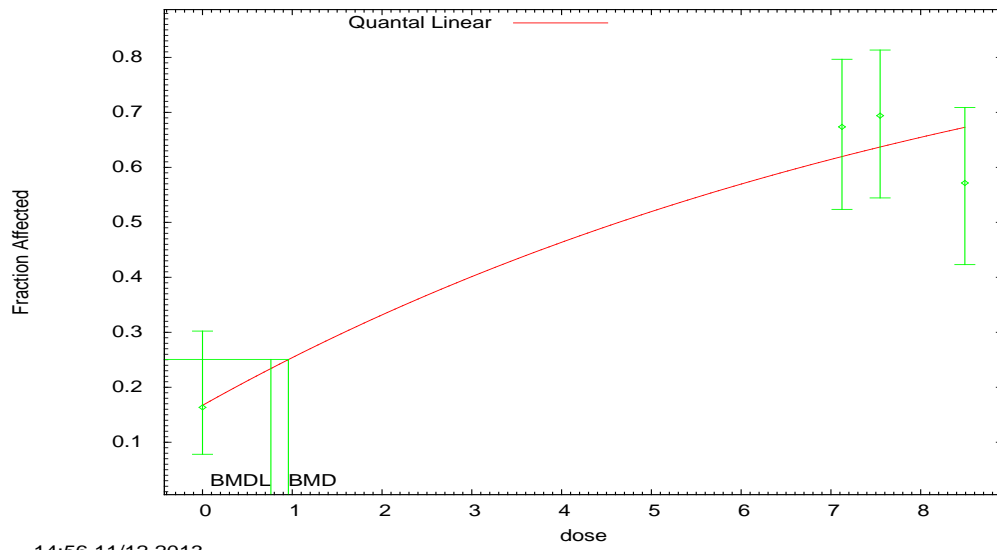

14:56 11/12 2013

### A: Gamma\_f\_reh\_md4\_Gam-BMR10-Restrict

Gamma Multi-Hit Model, with BMR of 10% Extra Risk for the BMD and 0.95 Lower Confidence Limit for the

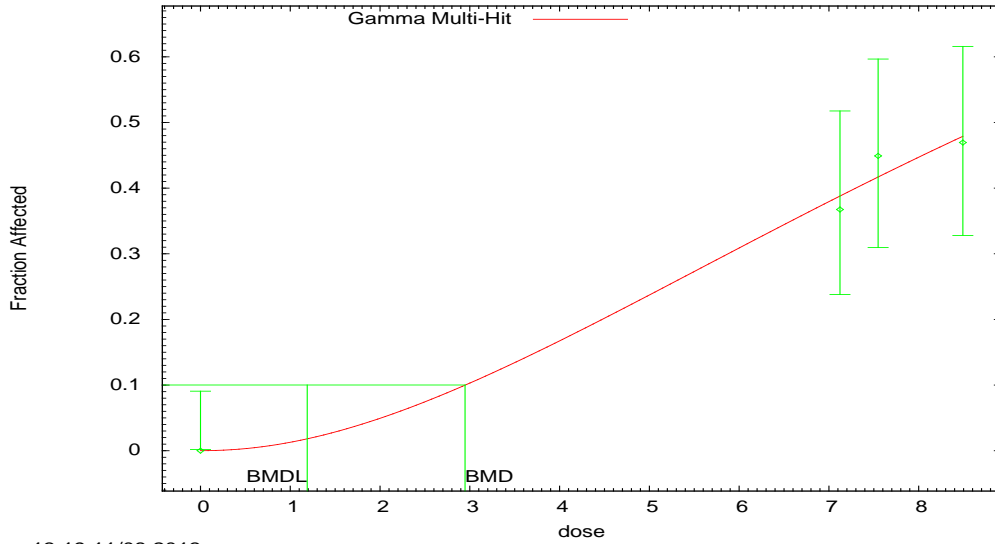

13:19 11/08 2013

### B: Logistic\_f\_reh\_md4\_Log-BMR10

Logistic Model, with BMR of 10% Extra Risk for the BMD and 0.95 Lower Confidence Limit for the BM

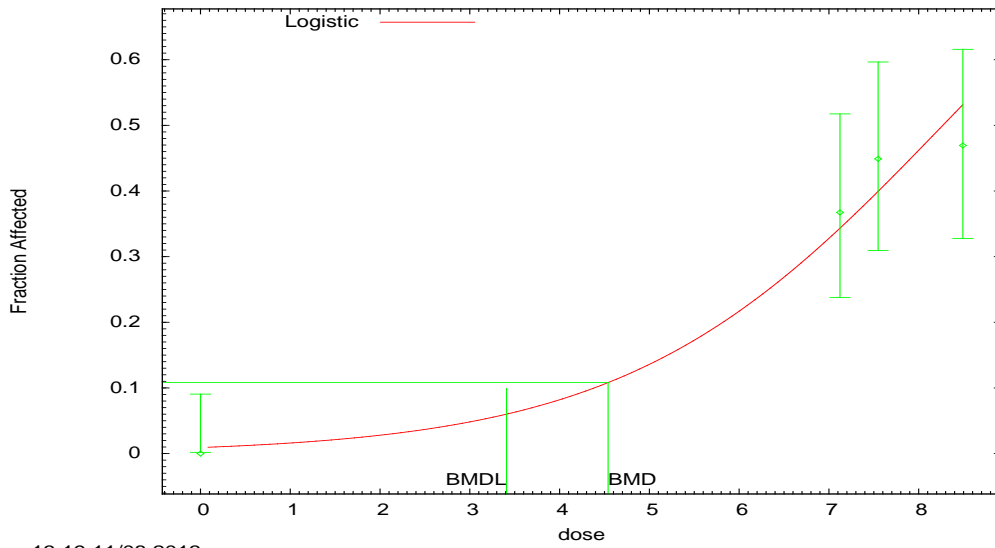

13:19 11/08 2013

### C: LogLogistic\_f\_reh\_md4\_Lnl-BMR10-Restrict

Log-Logistic Model, with BMR of 10% Extra Risk for the BMD and 0.95 Lower Confidence Limit for the E

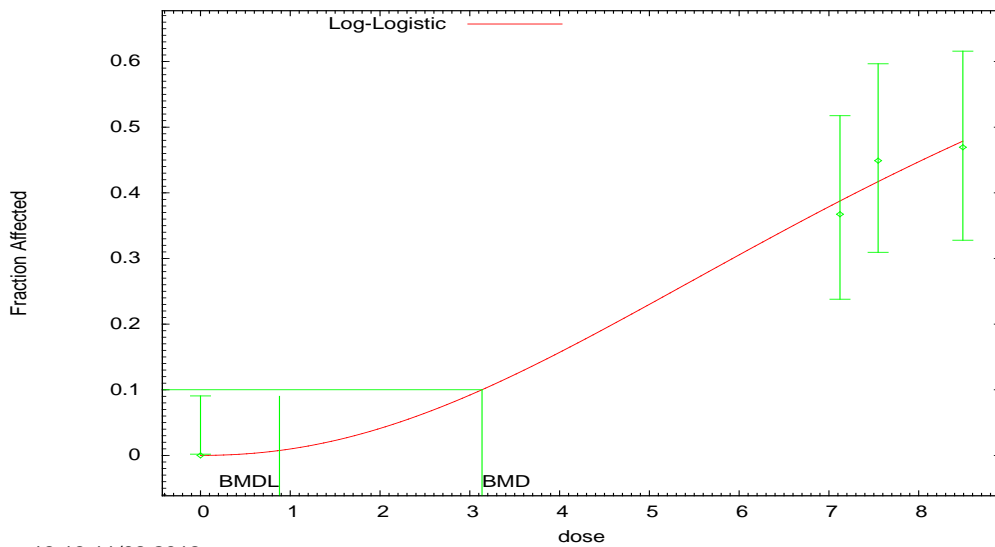

13:19 11/08 2013



**D: Probit\_f\_reh\_md4\_Pro-BMR10**

Probit Model, with BMR of 10% Extra Risk for the BMD and 0.95 Lower Confidence Limit for the BMD

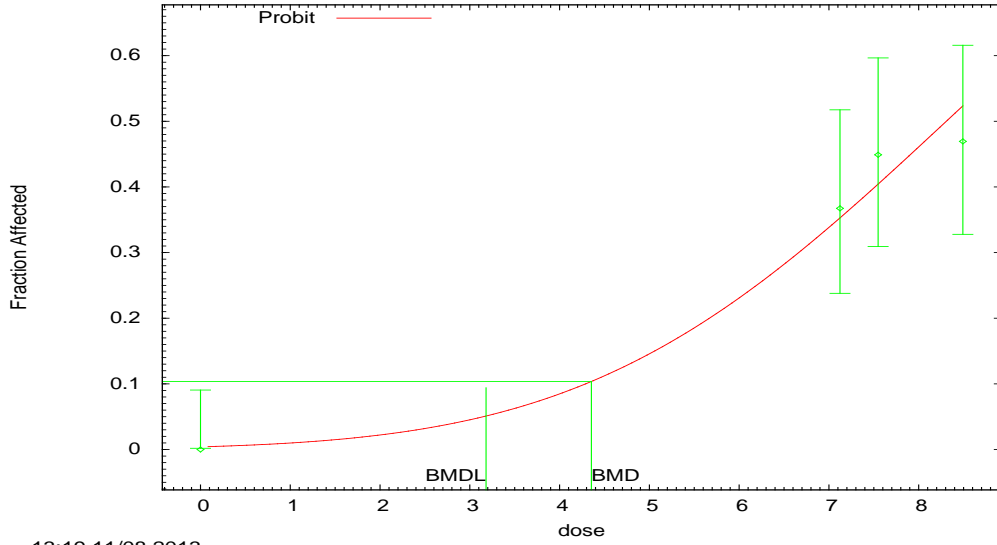

13:19 11/08 2013

**E: LogProbit\_f\_reh\_md4\_Lnp-BMR10-Restrict**

LogProbit Model, with BMR of 10% Extra Risk for the BMD and 0.95 Lower Confidence Limit for the BMD

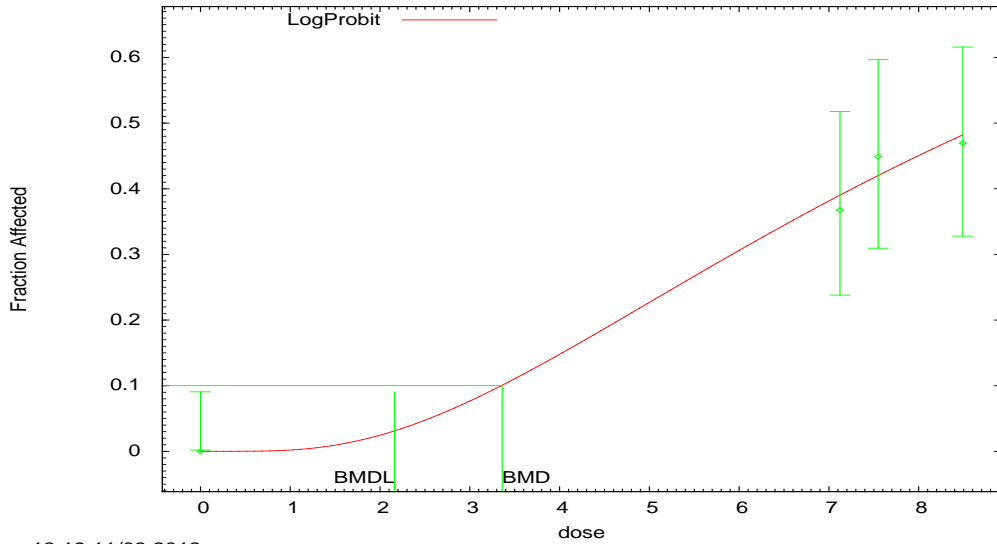

13:19 11/08 2013

**F: Multistage\_f\_reh\_md4\_Mst2-BMR10-Restrict**

Multistage Model, with BMR of 10% Extra Risk for the BMD and 0.95 Lower Confidence Limit for the BMD

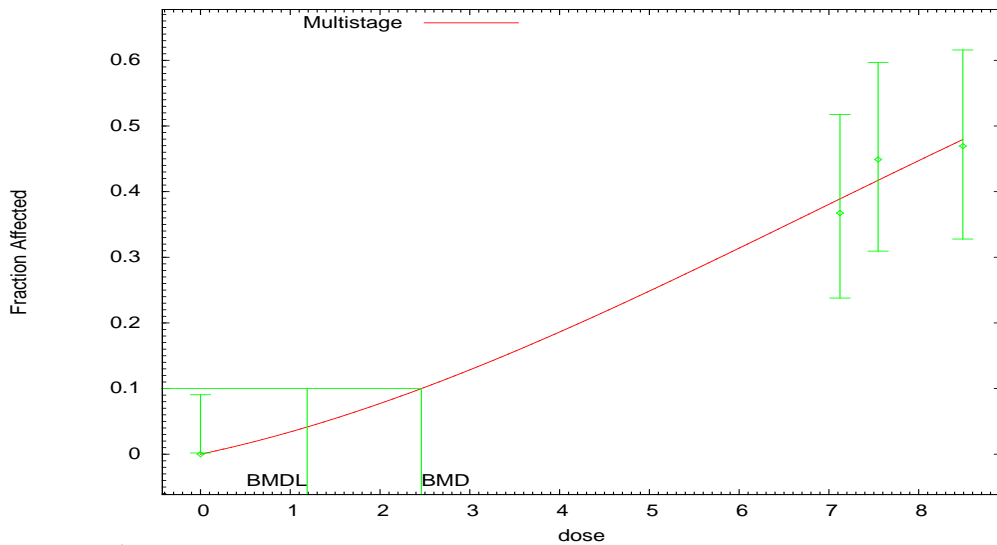

13:19 11/08 2013

### G: Weibull\_f\_reh\_md4\_Wei-BMR10-Restrict

Weibull Model, with BMR of 10% Extra Risk for the BMD and 0.95 Lower Confidence Limit for the BM

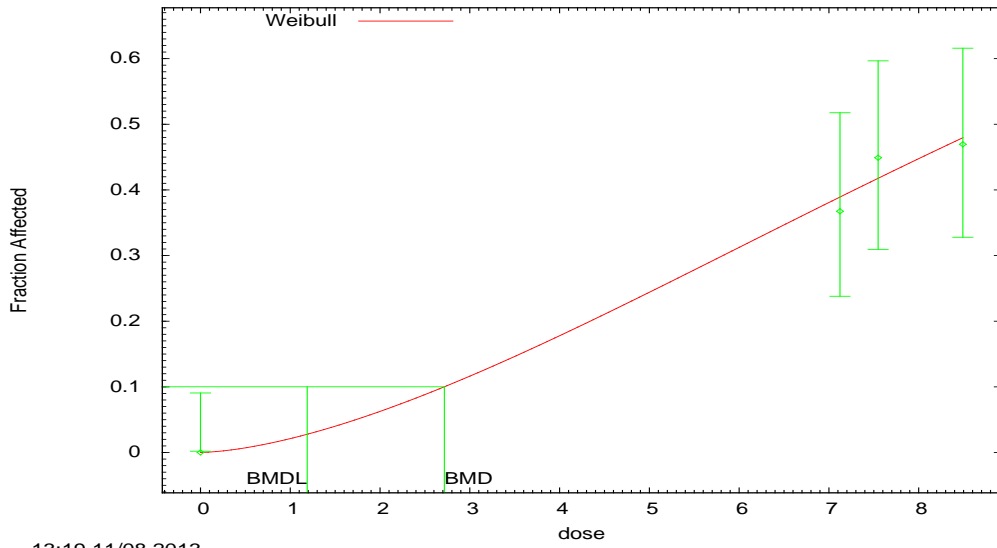

13:19 11/08 2013

### H: Quantal-Linear\_f\_reh\_md4\_Qln-BMR10

Quantal Linear Model, with BMR of 10% Extra Risk for the BMD and 0.95 Lower Confidence Limit for the

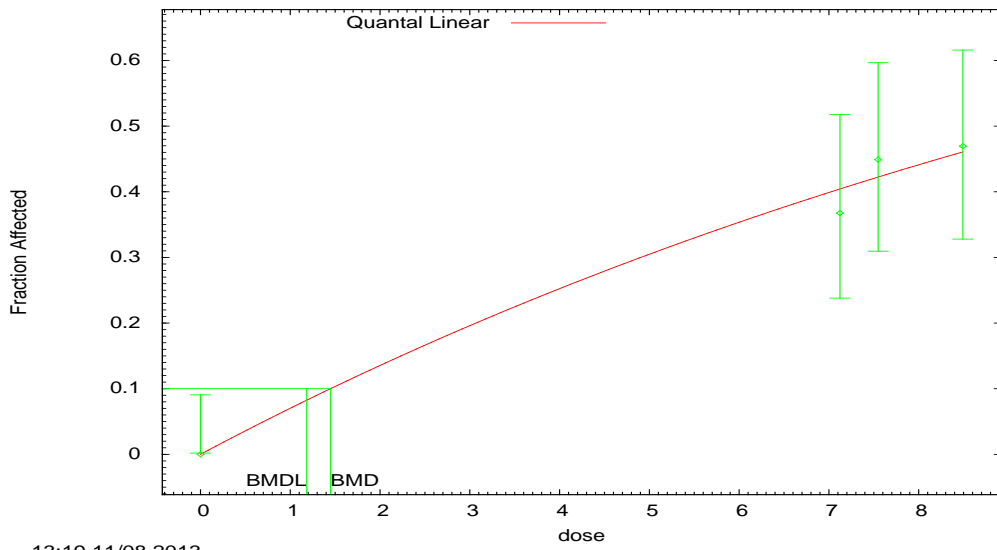

13:19 11/08 2013

### A: Gamma\_f\_resm\_md4\_Gam-BMR10-Restrict

Gamma Multi-Hit Model, with BMR of 10% Extra Risk for the BMD and 0.95 Lower Confidence Limit for the

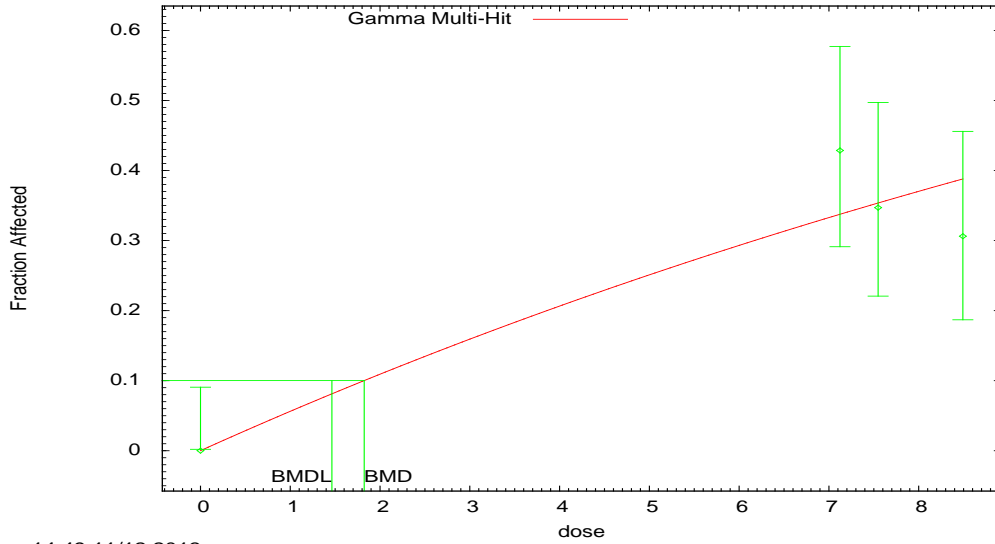

14:49 11/12 2013

### B: Logistic\_f\_resm\_md4\_Log-BMR10

Logistic Model, with BMR of 10% Extra Risk for the BMD and 0.95 Lower Confidence Limit for the BM

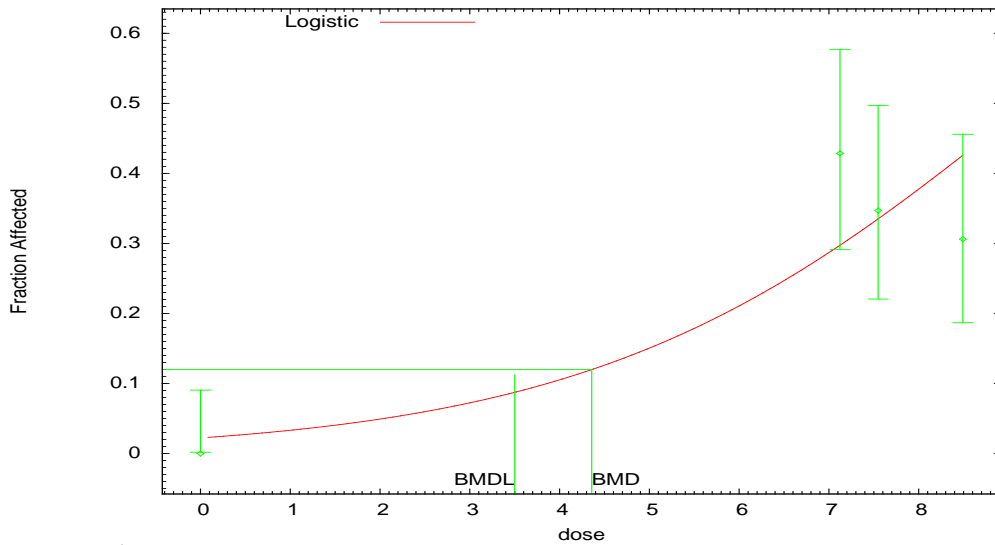

14:49 11/12 2013

### C: LogLogistic\_f\_resm\_md4\_Lnl-BMR10-Restrict

Log-Logistic Model, with BMR of 10% Extra Risk for the BMD and 0.95 Lower Confidence Limit for the E

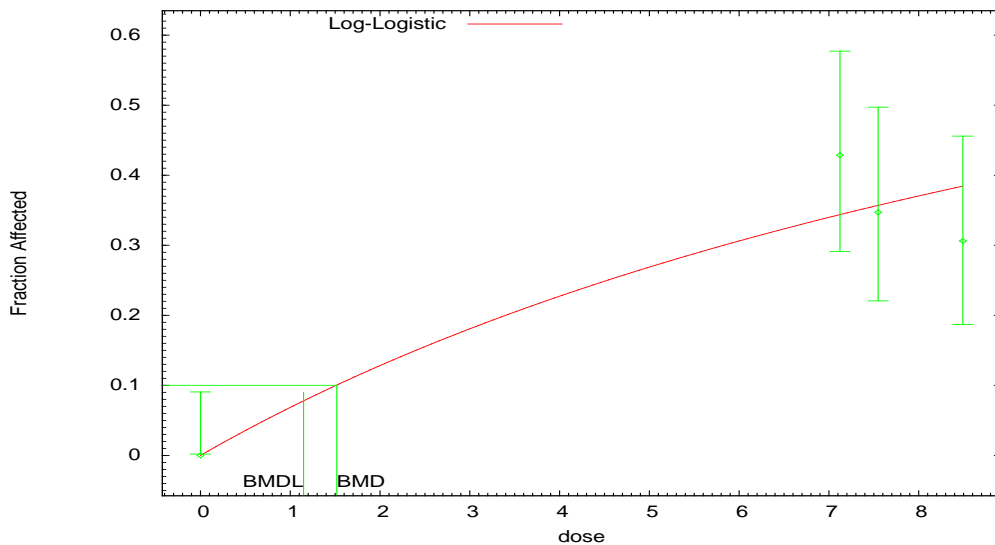

14:49 11/12 2013

**D: Probit\_f\_resm\_md4\_Pro-BMR10**

Probit Model, with BMR of 10% Extra Risk for the BMD and 0.95 Lower Confidence Limit for the BMD

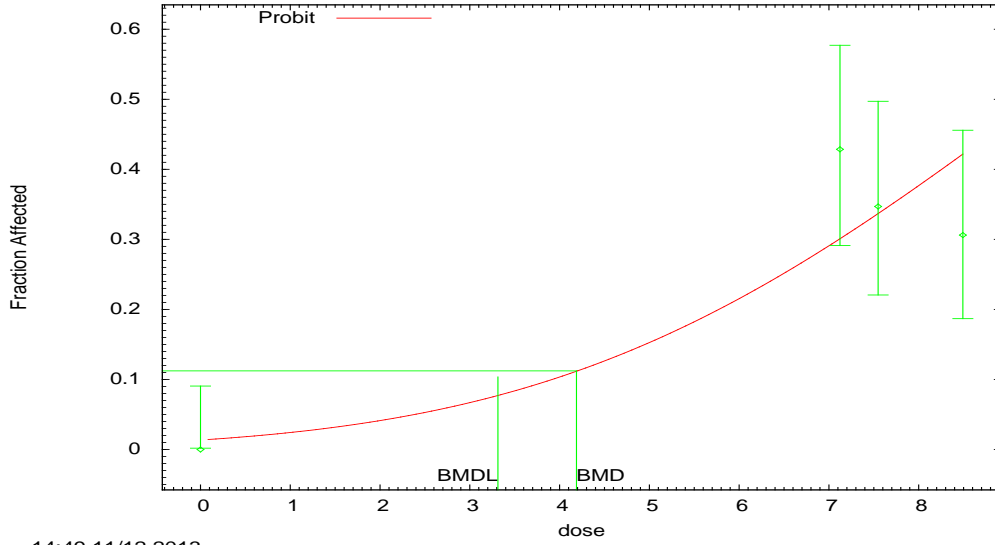

14:49 11/12 2013

**E: LogProbit\_f\_resm\_md4\_Lnp-BMR10-Restrict**

LogProbit Model, with BMR of 10% Extra Risk for the BMD and 0.95 Lower Confidence Limit for the BMD

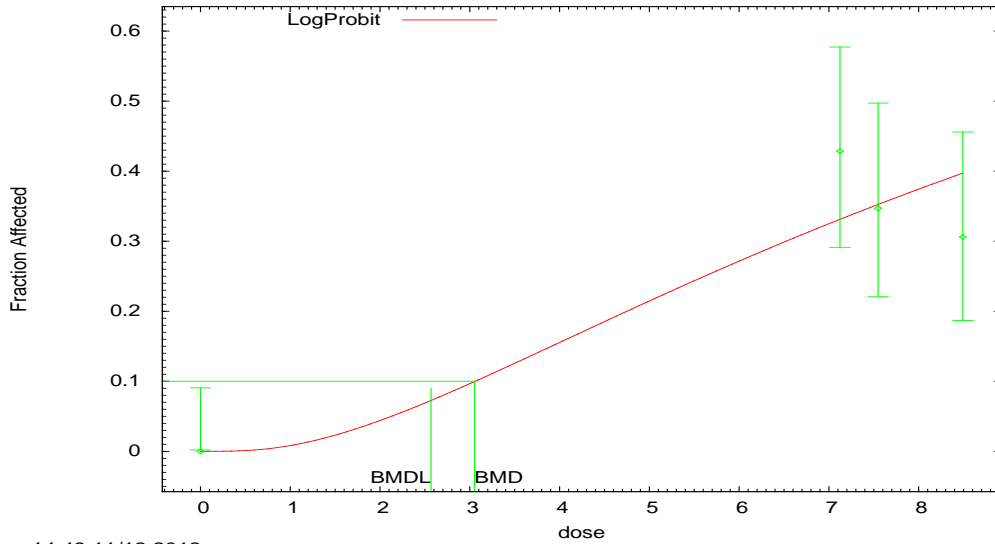

14:49 11/12 2013

**F: Multistage\_f\_resm\_md4\_Mst2-BMR10-Restrict**

Multistage Model, with BMR of 10% Extra Risk for the BMD and 0.95 Lower Confidence Limit for the BMD

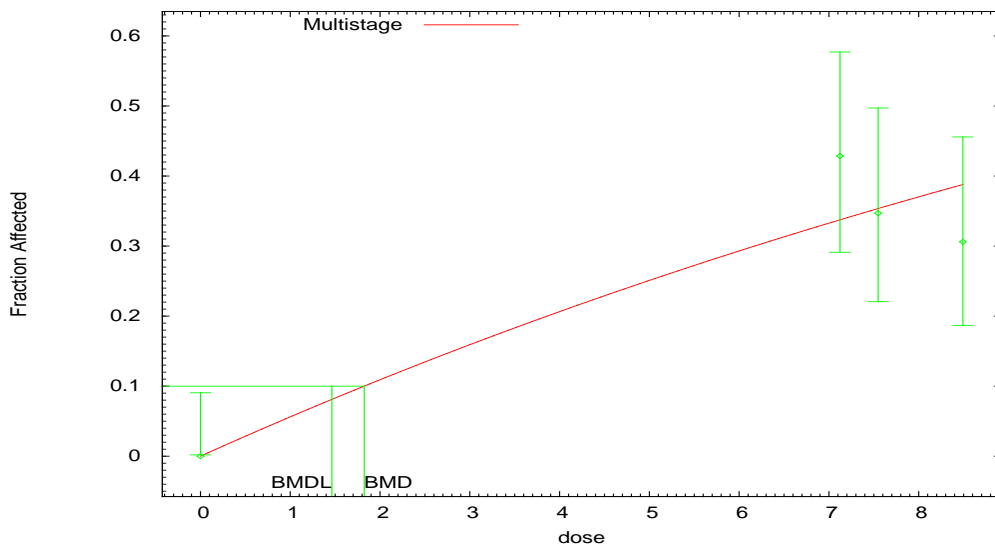

14:49 11/12 2013

### G: Weibull\_f\_resm\_md4\_Wei-BMR10-Restrict

Weibull Model, with BMR of 10% Extra Risk for the BMD and 0.95 Lower Confidence Limit for the BM

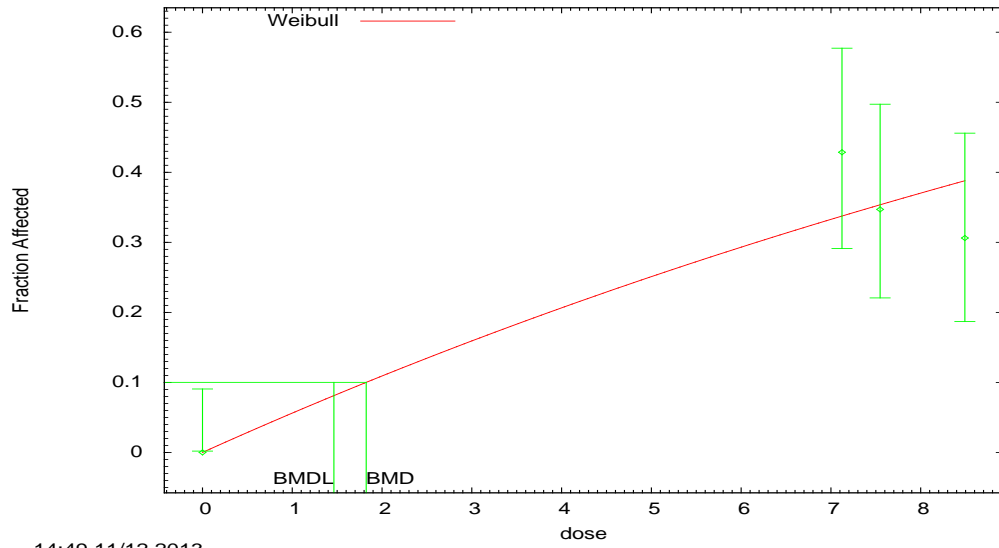

14:49 11/12 2013

### H: Quantal-Linear\_f\_resm\_md4\_Qln-BMR10

Quantal Linear Model, with BMR of 10% Extra Risk for the BMD and 0.95 Lower Confidence Limit for the

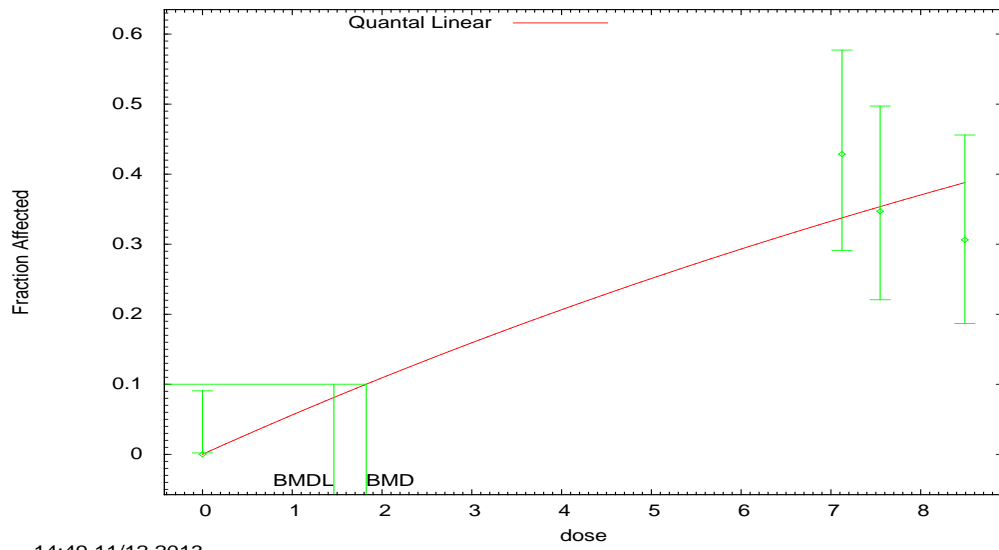

14:49 11/12 2013

### A: Gamma\_m\_oed\_md4\_Gam-BMR10-Restrict

Gamma Multi-Hit Model, with BMR of 10% Extra Risk for the BMD and 0.95 Lower Confidence Limit for the

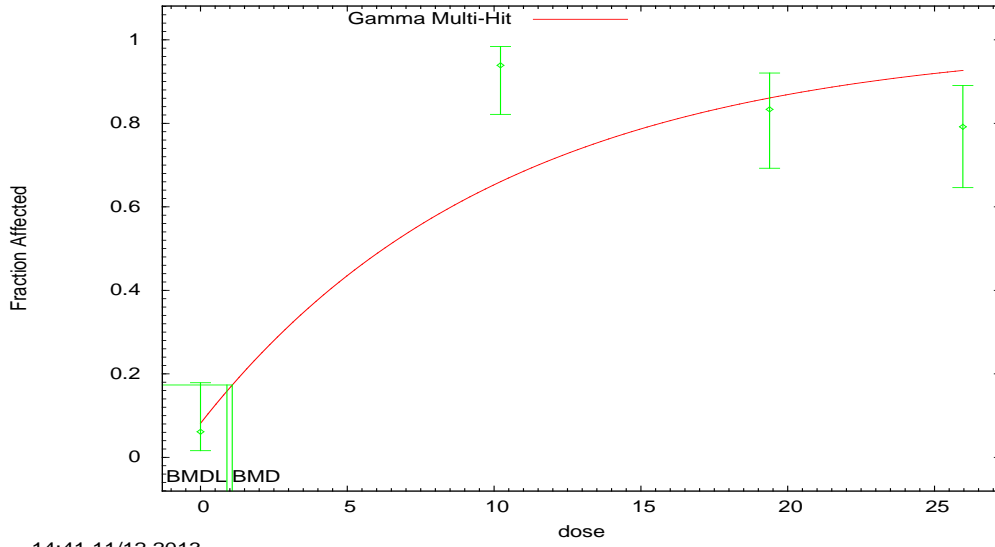

14:41 11/12 2013

### B: Logistic\_m\_oed\_md4\_Log-BMR10

Logistic Model, with BMR of 10% Extra Risk for the BMD and 0.95 Lower Confidence Limit for the BM

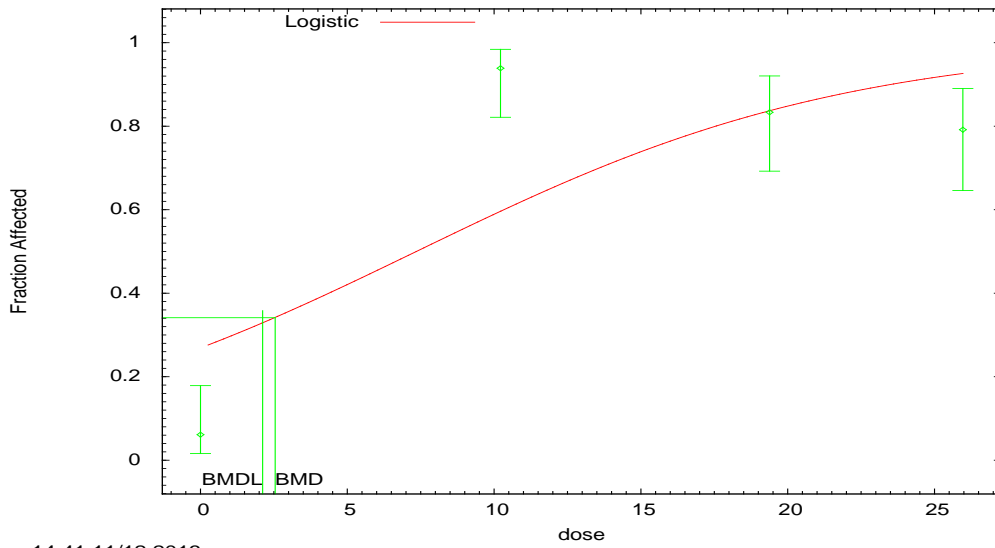

14:41 11/12 2013

### C: LogLogistic\_m\_oed\_md4\_Lnl-BMR10-Restrict

Log-Logistic Model, with BMR of 10% Extra Risk for the BMD and 0.95 Lower Confidence Limit for the E

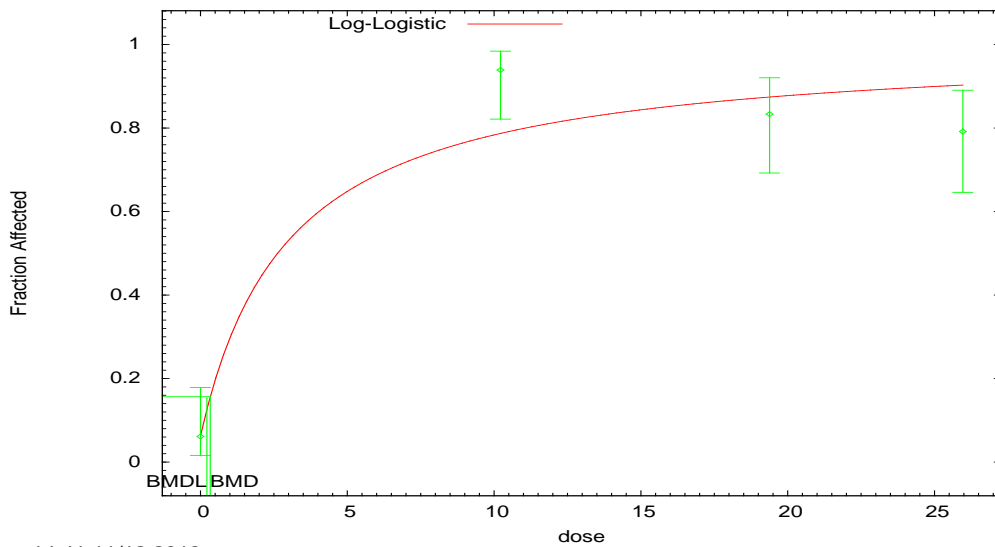

14:41 11/12 2013

**D: Probit\_m\_oed\_md4\_Pro-BMR10**

Probit Model, with BMR of 10% Extra Risk for the BMD and 0.95 Lower Confidence Limit for the BMD

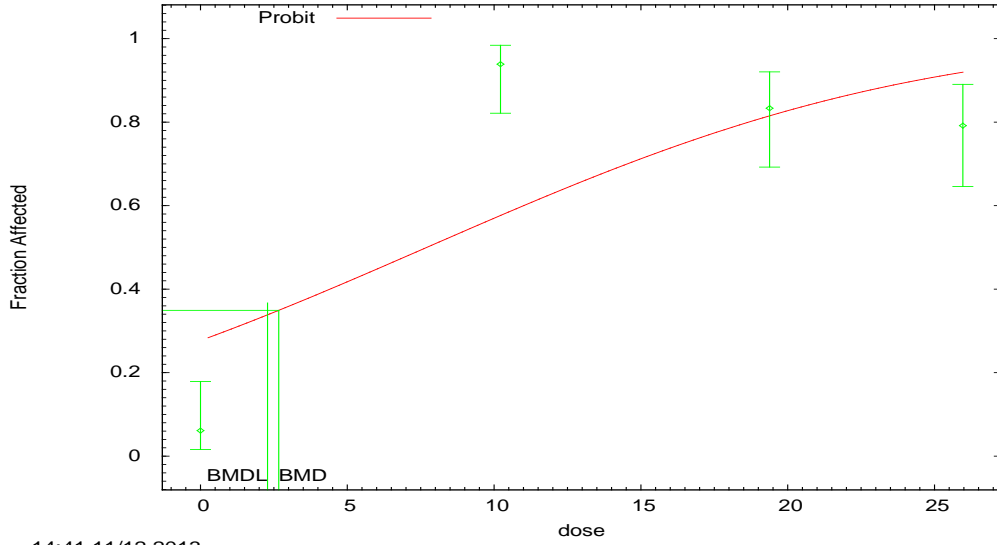

14:41 11/12 2013

**E: LogProbit\_m\_oed\_md4\_Lnp-BMR10-Restrict**

LogProbit Model, with BMR of 10% Extra Risk for the BMD and 0.95 Lower Confidence Limit for the BMD

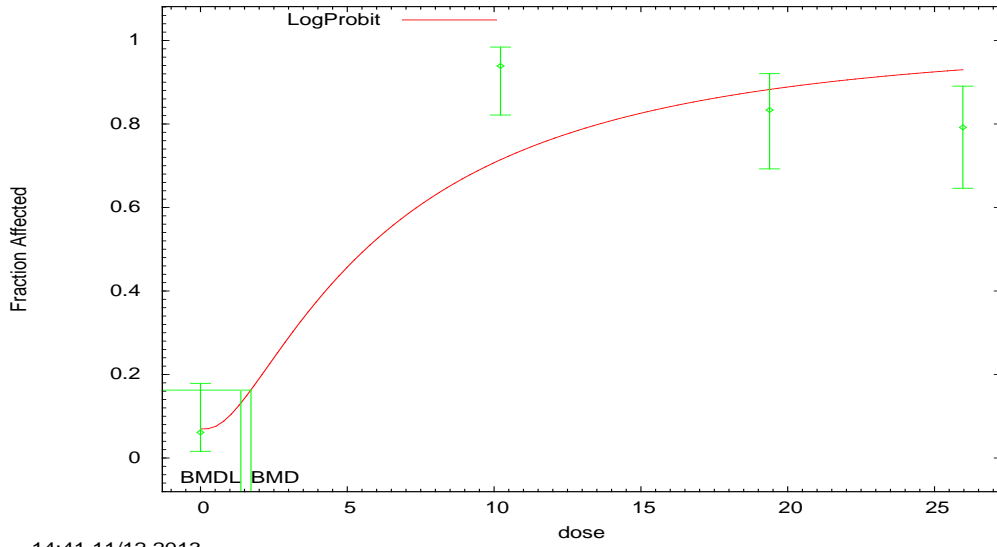

14:41 11/12 2013

**F: Multistage\_m\_oed\_md4\_Mst2-BMR10-Restrict**

Multistage Model, with BMR of 10% Extra Risk for the BMD and 0.95 Lower Confidence Limit for the BMD

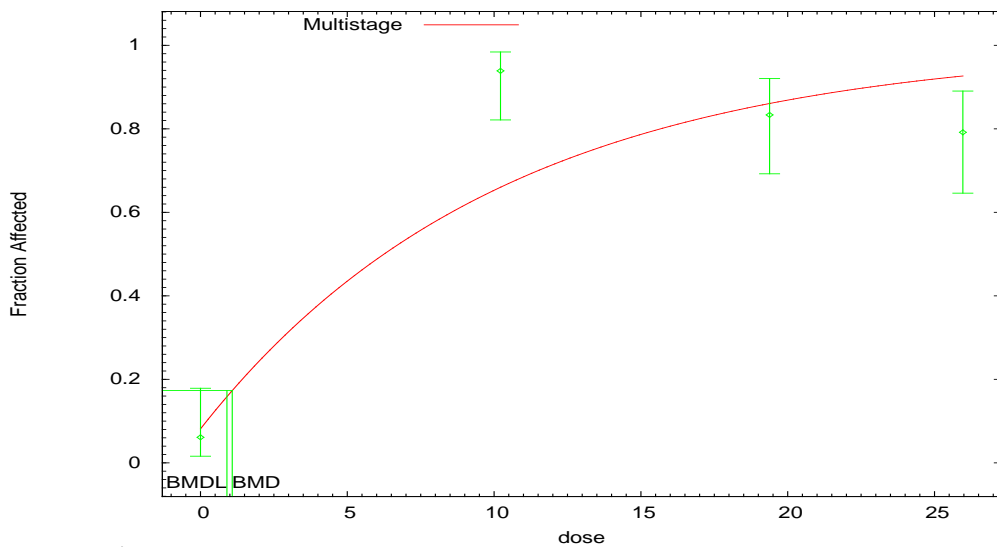

14:41 11/12 2013

### G: Weibull\_m\_oed\_md4\_Wei-BMR10-Restrict

Weibull Model, with BMR of 10% Extra Risk for the BMD and 0.95 Lower Confidence Limit for the BM

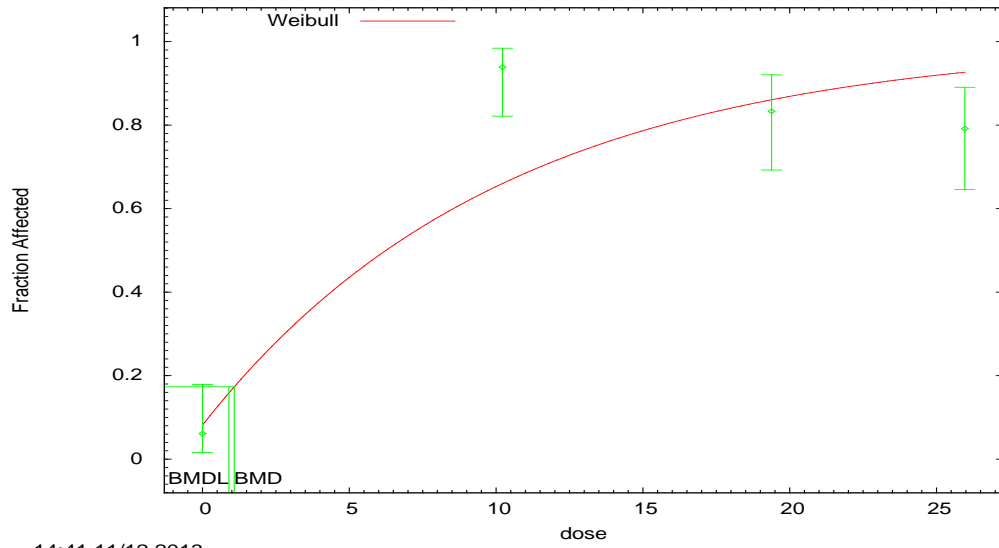

14:41 11/12 2013

### H: Quantal-Linear\_m\_oed\_md4\_Qln-BMR10

Quantal Linear Model, with BMR of 10% Extra Risk for the BMD and 0.95 Lower Confidence Limit for the

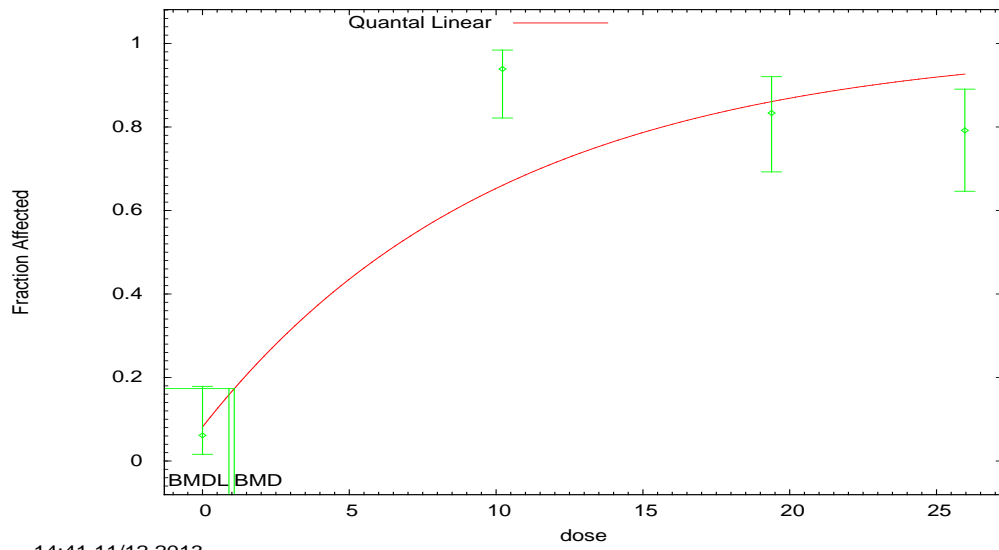

14:41 11/12 2013



### A: Gamma\_m\_oe\_h\_md4\_Gam-BMR10-Restrict

Gamma Multi-Hit Model, with BMR of 10% Extra Risk for the BMD and 0.95 Lower Confidence Limit for the

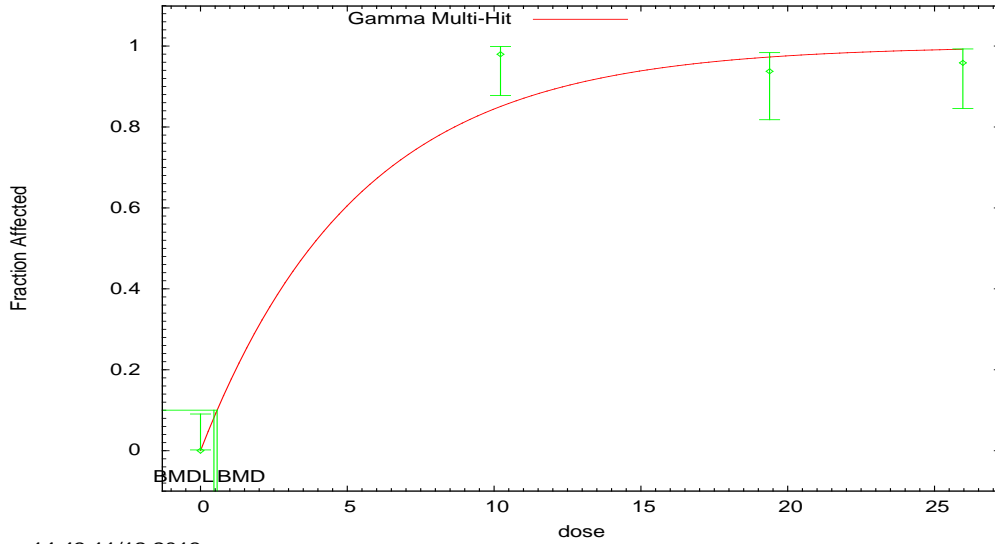

14:43 11/12 2013

### B: Logistic\_m\_oe\_h\_md4\_Log-BMR10

Logistic Model, with BMR of 10% Extra Risk for the BMD and 0.95 Lower Confidence Limit for the BM

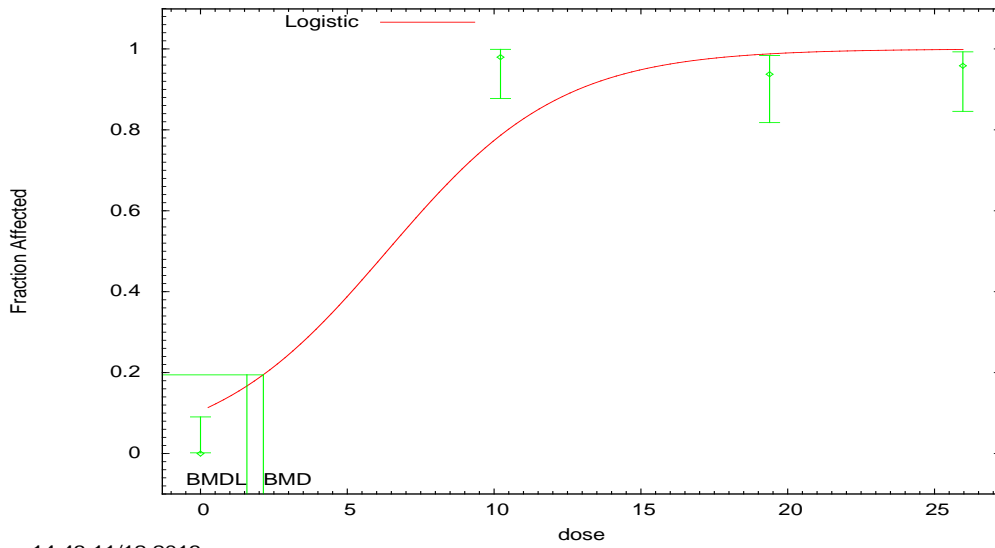

14:43 11/12 2013

### C: LogLogistic\_m\_oe\_h\_md4\_Lnl-BMR10-Restrict

Log-Logistic Model, with BMR of 10% Extra Risk for the BMD and 0.95 Lower Confidence Limit for the E

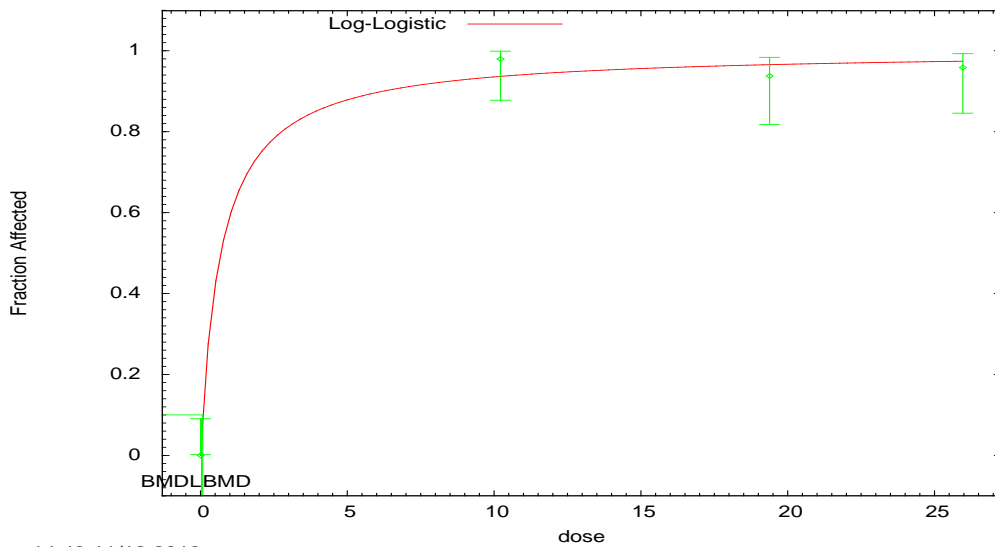

14:43 11/12 2013

**D: Probit\_m\_oe\_h\_md4\_Pro-BMR10**

Probit Model, with BMR of 10% Extra Risk for the BMD and 0.95 Lower Confidence Limit for the BMD

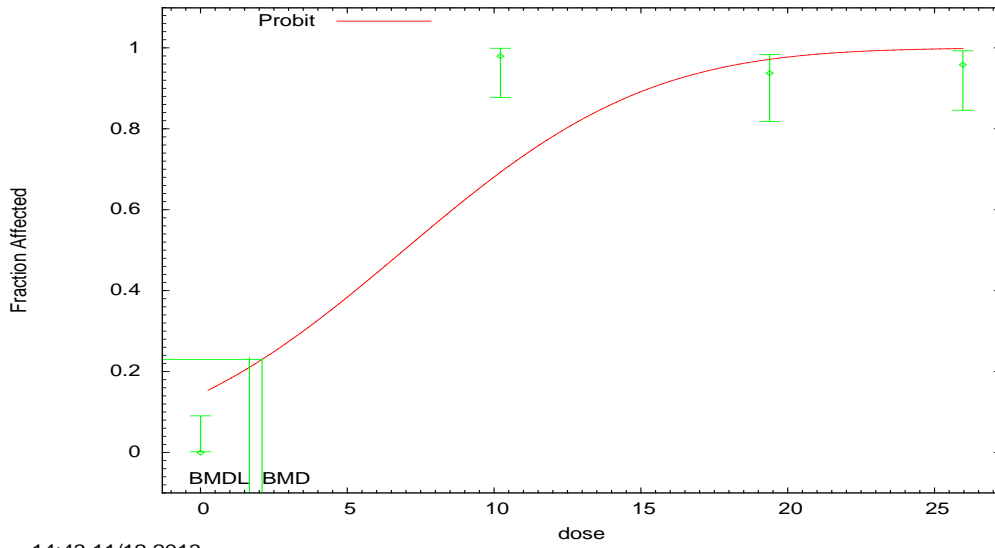

14:43 11/12 2013

**E: LogProbit\_m\_oe\_h\_md4\_Lnp-BMR10-Restrict**

LogProbit Model, with BMR of 10% Extra Risk for the BMD and 0.95 Lower Confidence Limit for the BMD

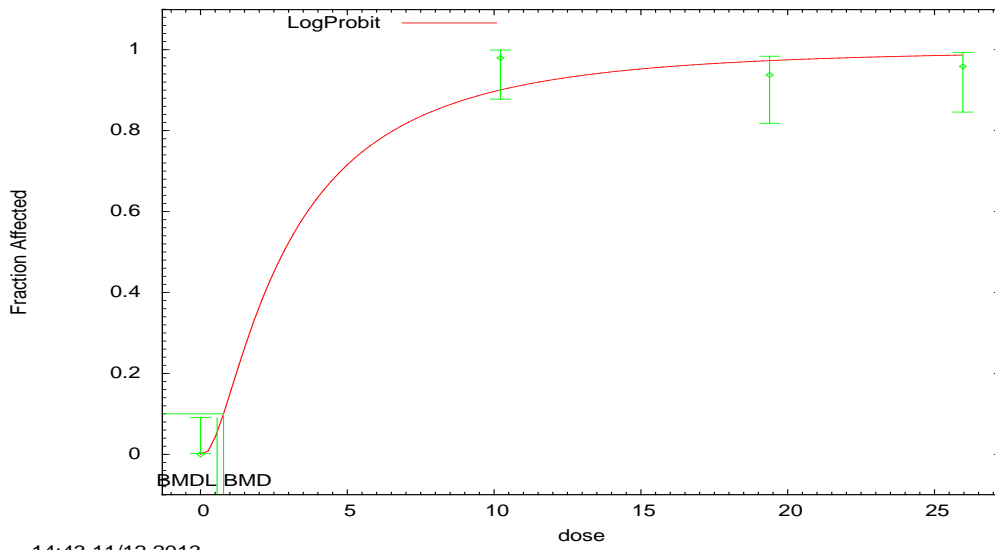

14:43 11/12 2013

**F: Multistage\_m\_oe\_h\_md4\_Mst2-BMR10-Restrict**

Multistage Model, with BMR of 10% Extra Risk for the BMD and 0.95 Lower Confidence Limit for the BMD

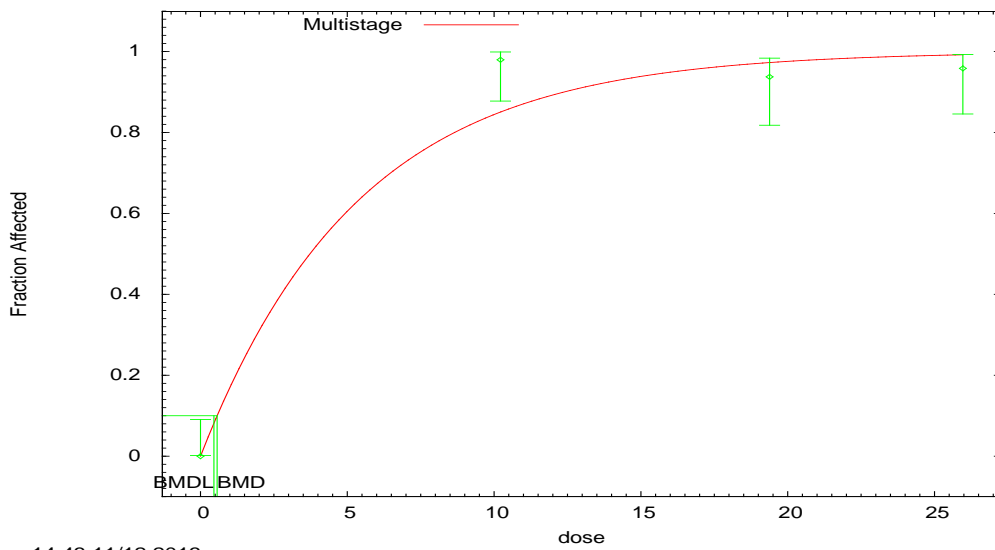

14:43 11/12 2013

### G: Weibull\_m\_oh\_md4\_Wei-BMR10-Restrict

Weibull Model, with BMR of 10% Extra Risk for the BMD and 0.95 Lower Confidence Limit for the BM

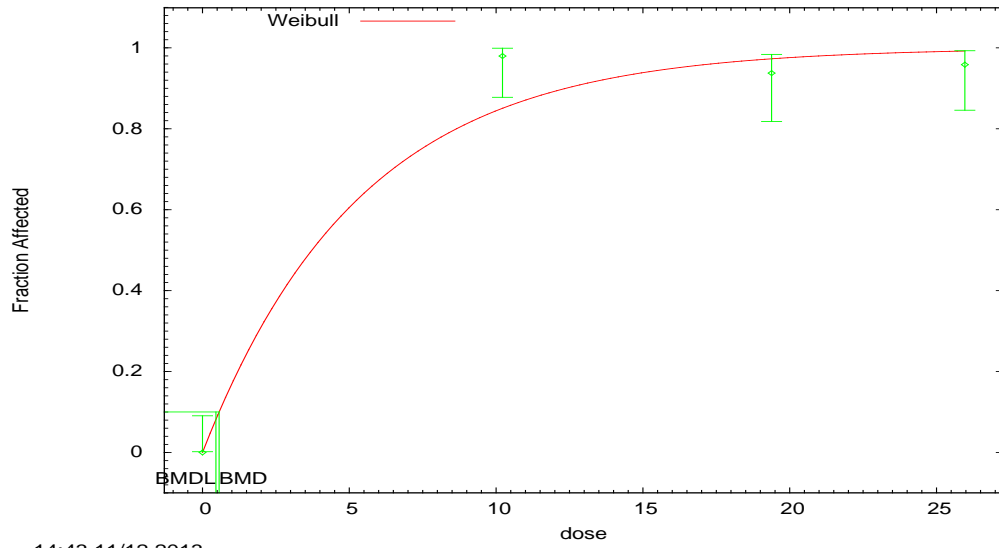

14:43 11/12 2013

### H: Quantal-Linear\_m\_oh\_md4\_Qln-BMR10

Quantal Linear Model, with BMR of 10% Extra Risk for the BMD and 0.95 Lower Confidence Limit for the

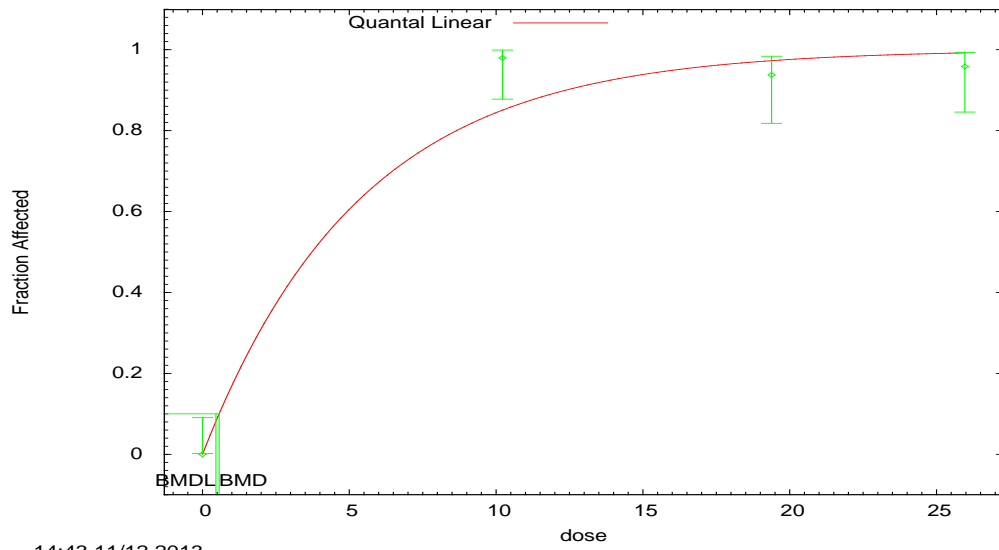

14:43 11/12 2013

### A: Gamma\_m\_red\_md4\_Gam-BMR10-Restrict

Gamma Multi-Hit Model, with BMR of 10% Extra Risk for the BMD and 0.95 Lower Confidence Limit for the

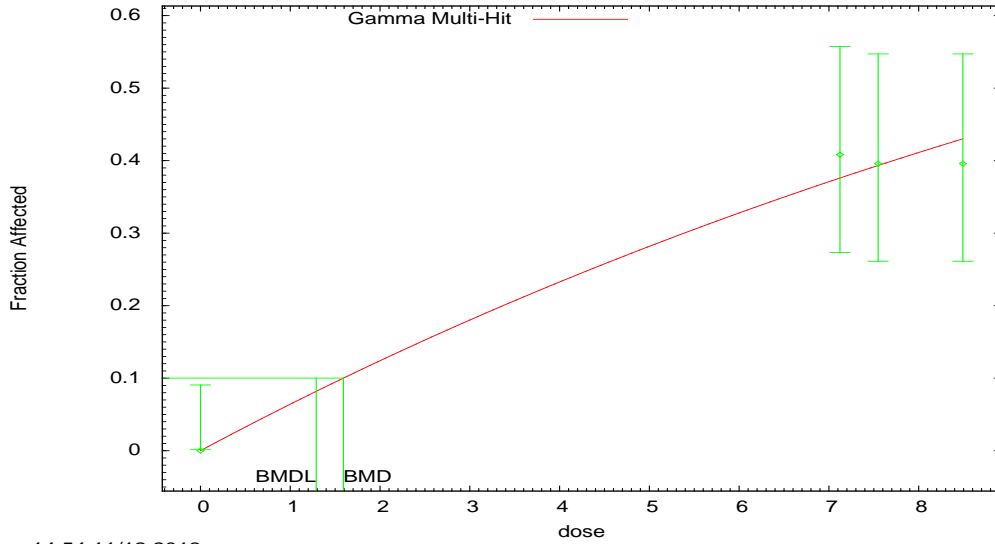

14:54 11/12 2013

### B: Logistic\_m\_red\_md4\_Log-BMR10

Logistic Model, with BMR of 10% Extra Risk for the BMD and 0.95 Lower Confidence Limit for the BM

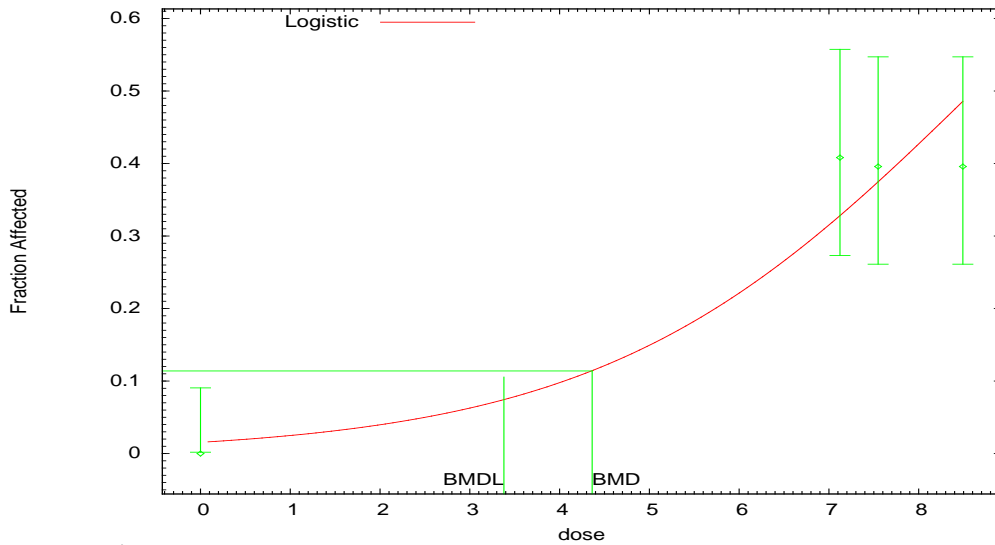

14:54 11/12 2013

### C: LogLogistic\_m\_red\_md4\_Lnl-BMR10-Restrict

Log-Logistic Model, with BMR of 10% Extra Risk for the BMD and 0.95 Lower Confidence Limit for the E

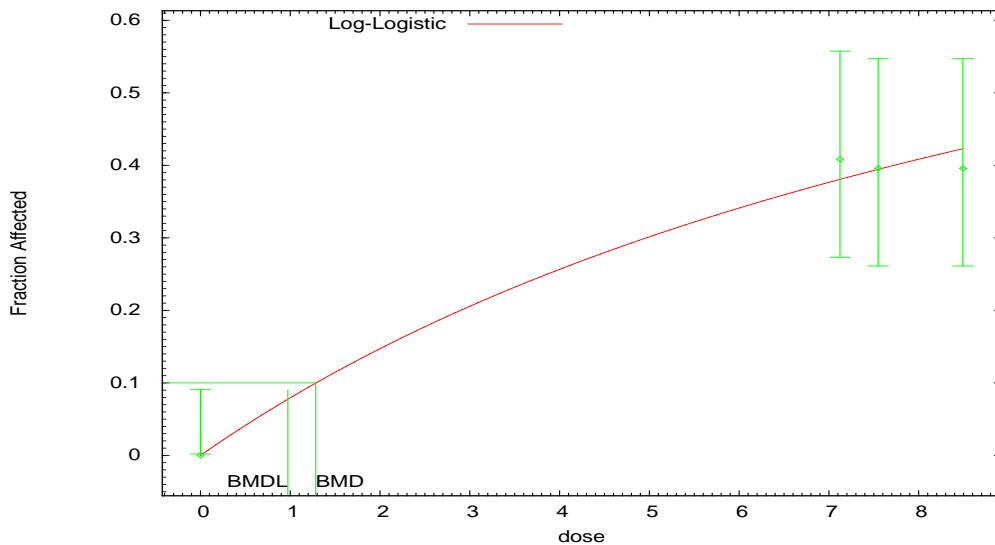

14:54 11/12 2013

**D: Probit\_m\_red\_md4\_Pro-BMR10**

Probit Model, with BMR of 10% Extra Risk for the BMD and 0.95 Lower Confidence Limit for the BMD

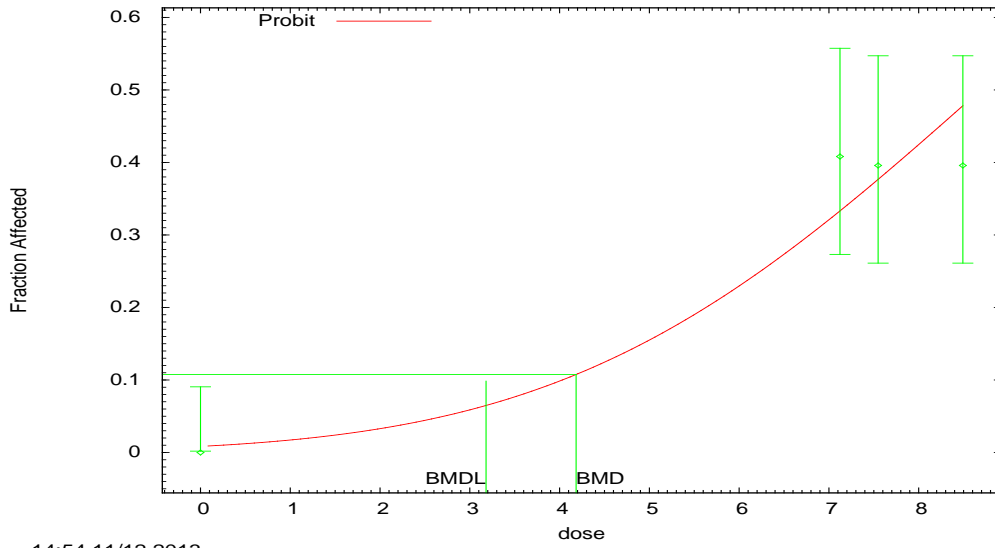

14:54 11/12 2013

**E: LogProbit\_m\_red\_md4\_Lnp-BMR10-Restrict**

LogProbit Model, with BMR of 10% Extra Risk for the BMD and 0.95 Lower Confidence Limit for the BMD

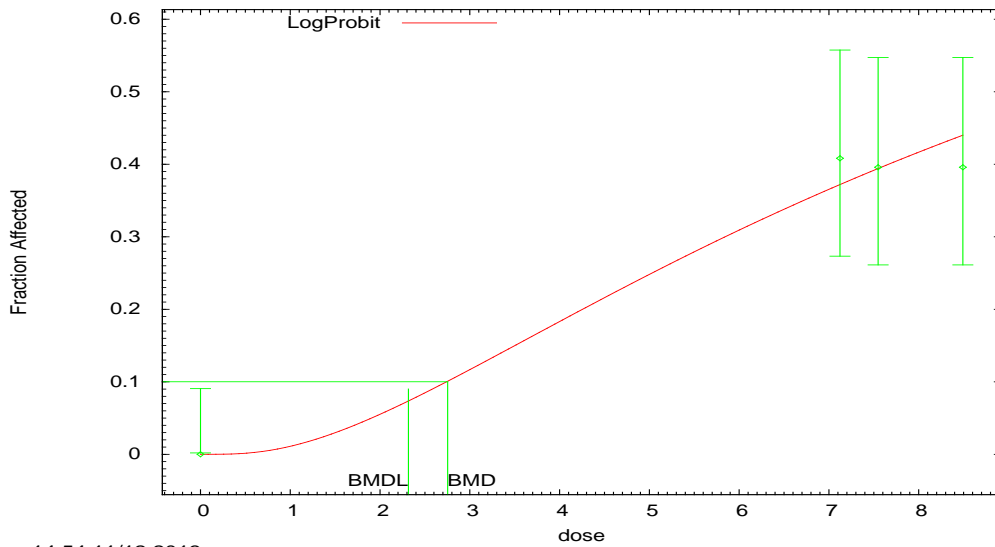

14:54 11/12 2013

**F: Multistage\_m\_red\_md4\_Mst2-BMR10-Restrict**

Multistage Model, with BMR of 10% Extra Risk for the BMD and 0.95 Lower Confidence Limit for the BMD

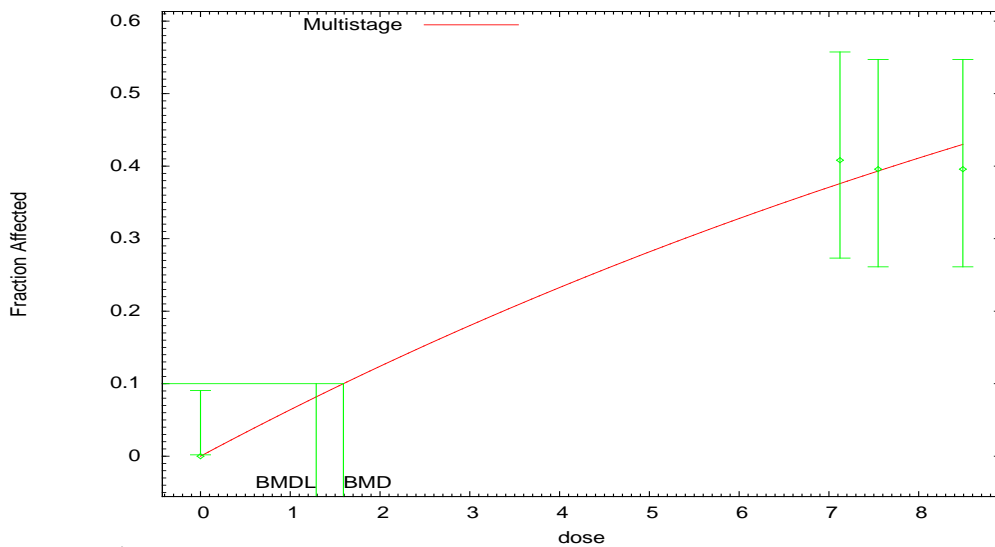

14:54 11/12 2013

### G: Weibull\_m\_red\_md4\_Wei-BMR10-Restrict

Weibull Model, with BMR of 10% Extra Risk for the BMD and 0.95 Lower Confidence Limit for the BM

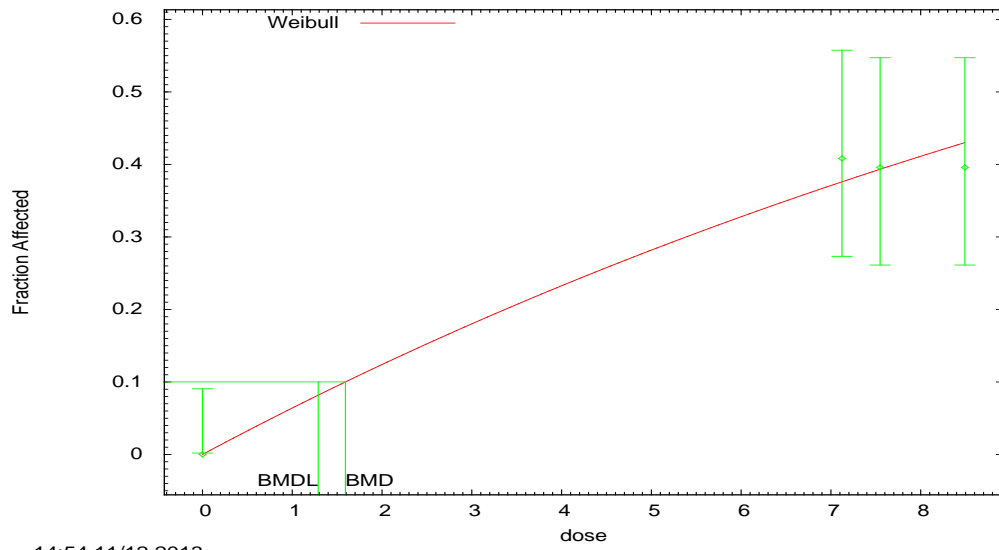

14:54 11/12 2013

### H: Quantal-Linear\_m\_red\_md4\_Qln-BMR10

Quantal Linear Model, with BMR of 10% Extra Risk for the BMD and 0.95 Lower Confidence Limit for the

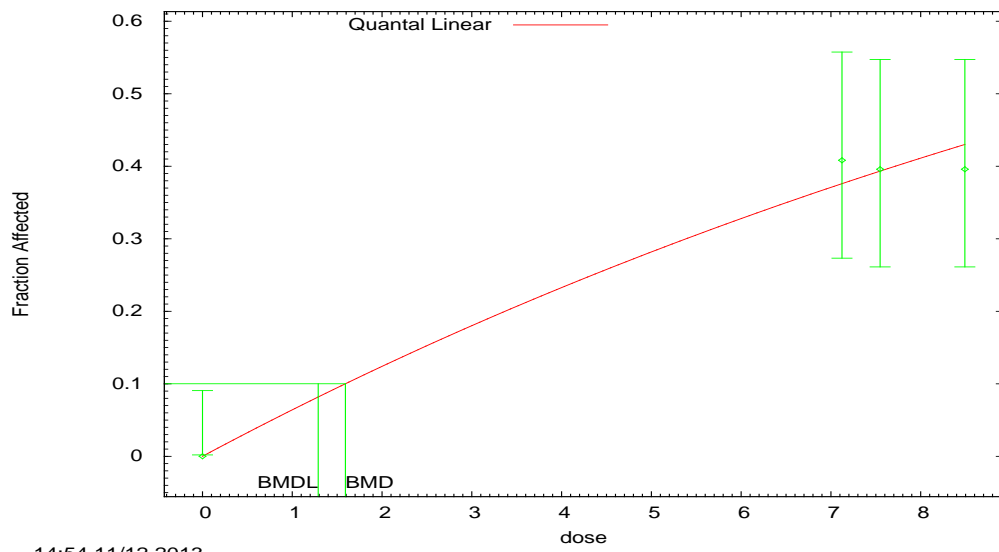

14:54 11/12 2013

### A: Gamma\_m\_reh\_md4\_Gam-BMR10-Restrict

Gamma Multi-Hit Model, with BMR of 10% Extra Risk for the BMD and 0.95 Lower Confidence Limit for the BMD

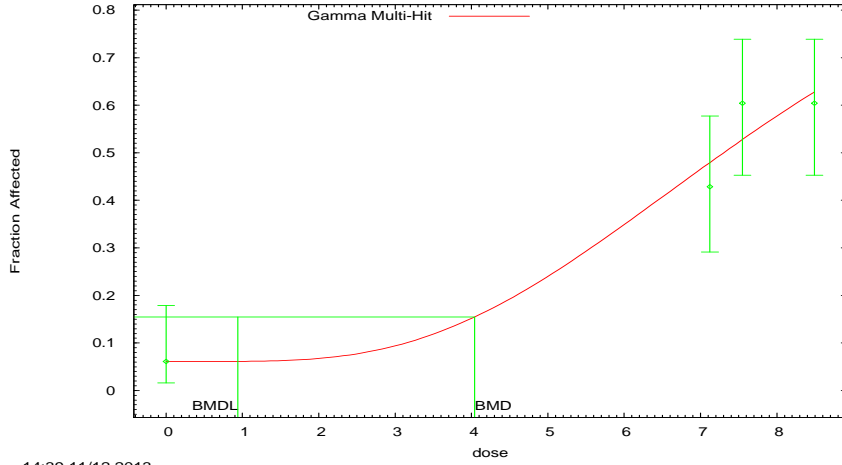

14:39 11/12 2013

### B: Logistic\_m\_reh\_md4\_Log-BMR10

Logistic Model, with BMR of 10% Extra Risk for the BMD and 0.95 Lower Confidence Limit for the BMDL

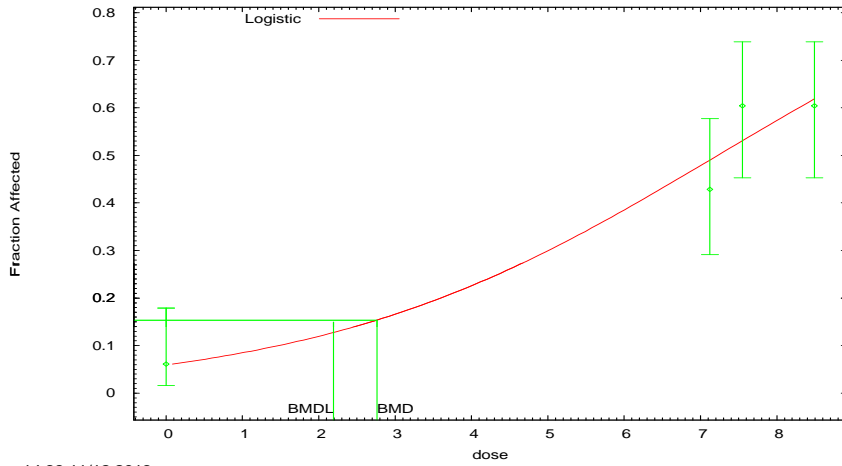

14:39 11/12 2013

### C: LogLogistic\_m\_reh\_md4\_Lnl-BMR10-Restrict

Log-Logistic Model, with BMR of 10% Extra Risk for the BMD and 0.95 Lower Confidence Limit for the BMDL

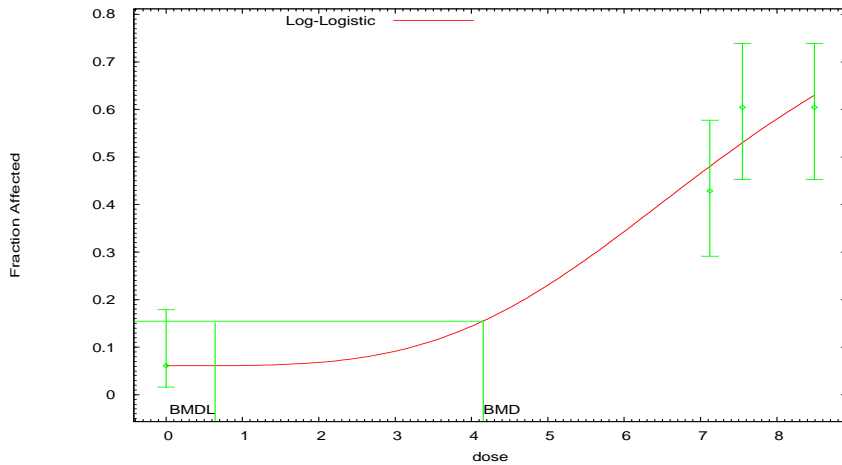

14:39 11/12 2013

**D: Probit\_m\_reh\_md4\_Pro-BMR10**

Probit Model, with BMR of 10% Extra Risk for the BMD and 0.95 Lower Confidence Limit for the BMDL

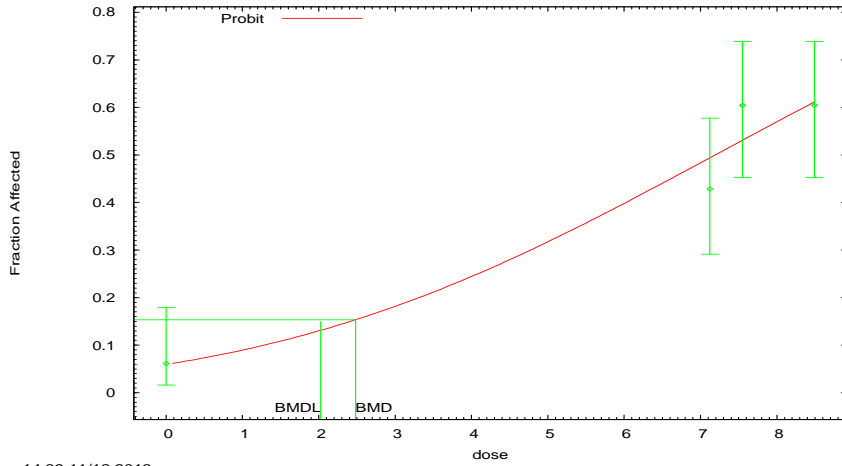

14:39 11/12 2013

**E: LogProbit\_m\_reh\_md4\_Lnp-BMR10-Restrict**

LogProbit Model, with BMR of 10% Extra Risk for the BMD and 0.95 Lower Confidence Limit for the BMDL

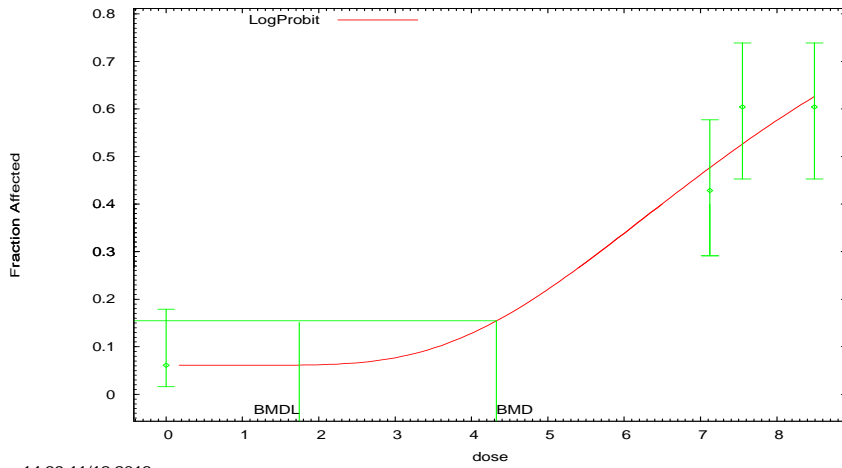

14:39 11/12 2013

**F: Multistage\_m\_reh\_md4\_Mst2-BMR10-Restrict**

Multistage Model, with BMR of 10% Extra Risk for the BMD and 0.95 Lower Confidence Limit for the BMDL

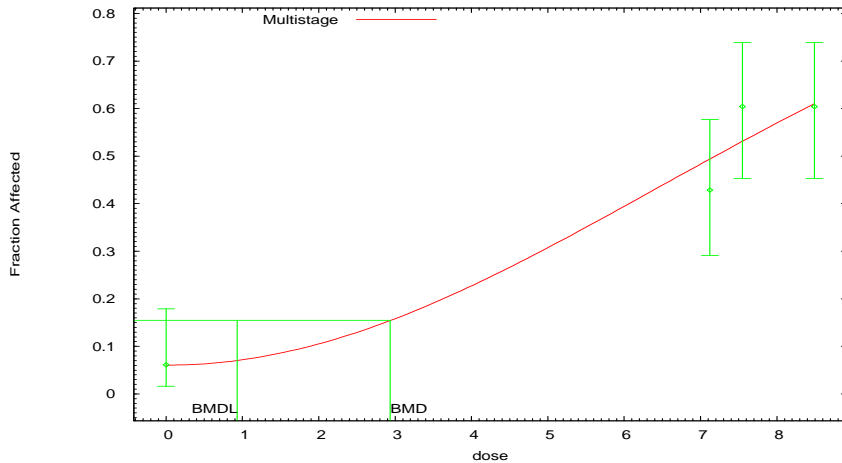

14:39 11/12 2013



### G: Weibull\_m\_reh\_md4\_Wei-BMR10-Restrict

Weibull Model, with BMR of 10% Extra Risk for the BMD and 0.95 Lower Confidence Limit for the BMDL

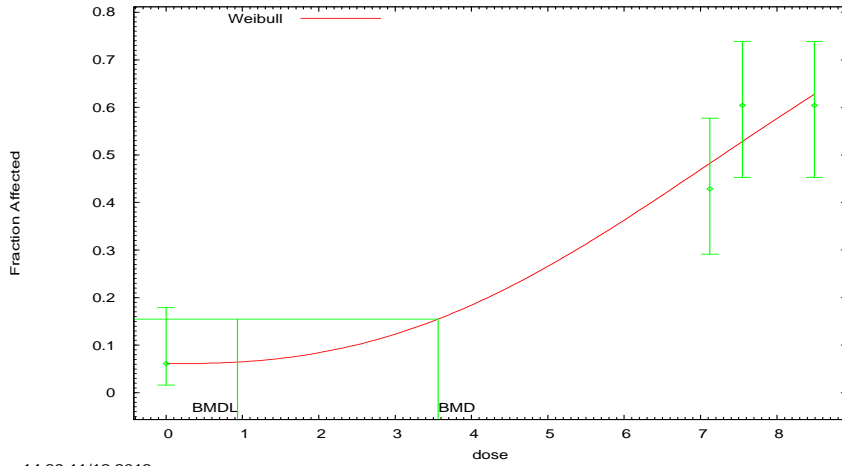

14:39 11/12 2013

### H: Quantal-Linear\_m\_reh\_md4\_Qln-BMR10

Quantal Linear Model, with BMR of 10% Extra Risk for the BMD and 0.95 Lower Confidence Limit for the BMD

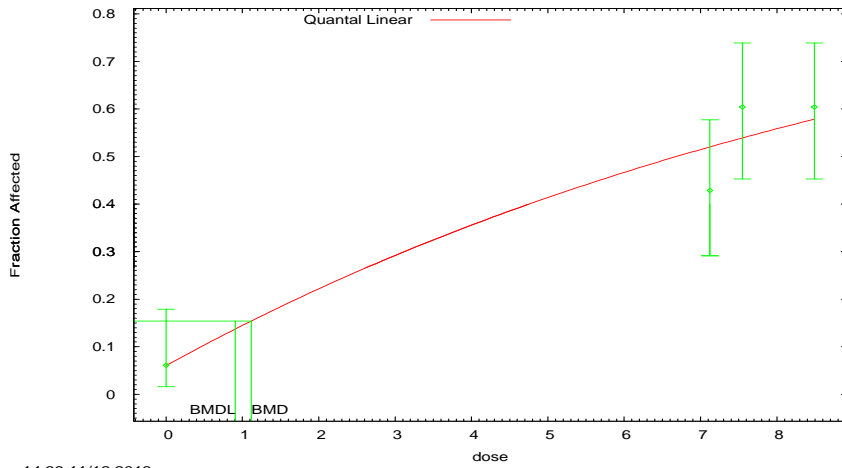

14:39 11/12 2013

### A: Gamma\_m\_resm\_md4\_Gam-BMR10-Restrict

Gamma Multi-Hit Model, with BMR of 10% Extra Risk for the BMD and 0.95 Lower Confidence Limit for the

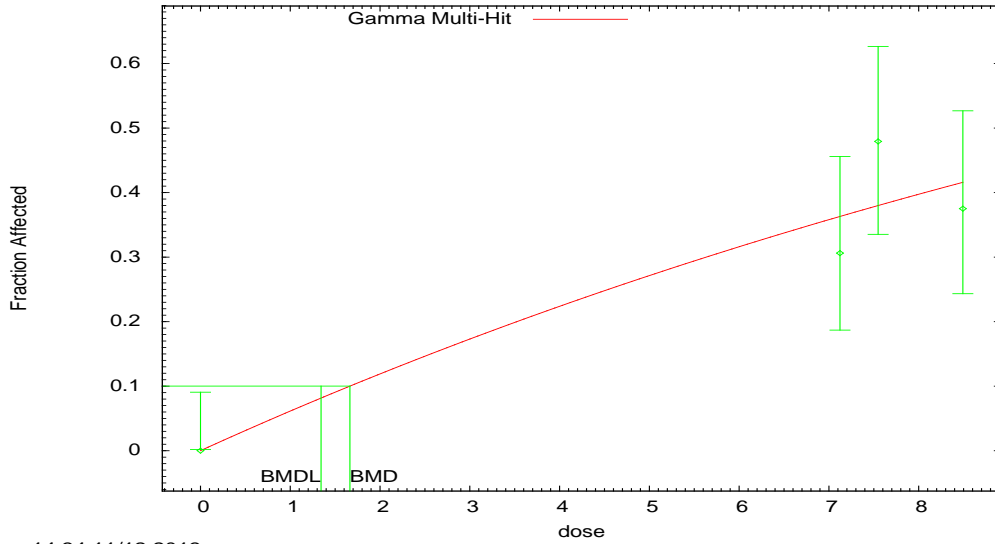

14:34 11/12 2013

### B: Logistic\_m\_resm\_md4\_Log-BMR10

Logistic Model, with BMR of 10% Extra Risk for the BMD and 0.95 Lower Confidence Limit for the BM

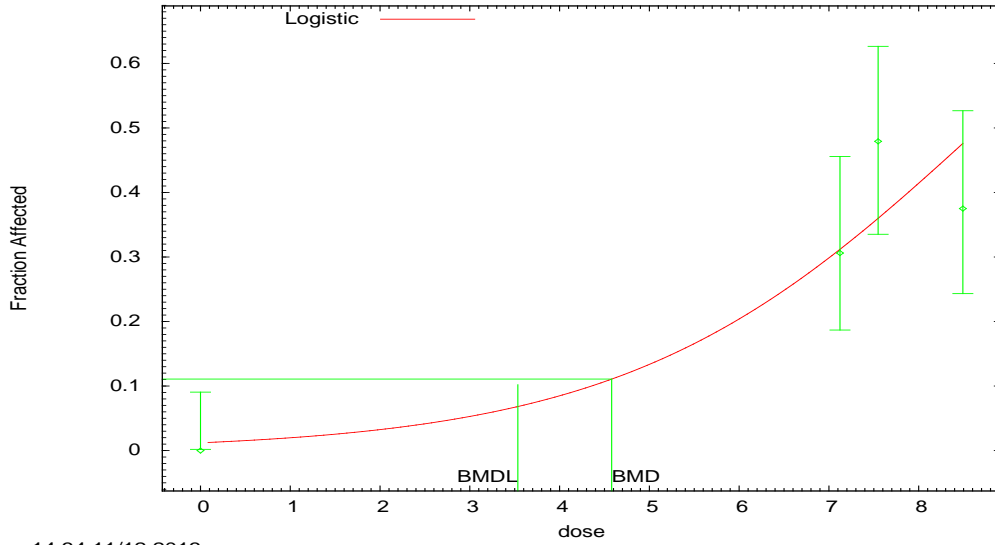

14:34 11/12 2013

### C: LogLogistic\_m\_resm\_md4\_Lnl-BMR10-Restrict

Log-Logistic Model, with BMR of 10% Extra Risk for the BMD and 0.95 Lower Confidence Limit for the E

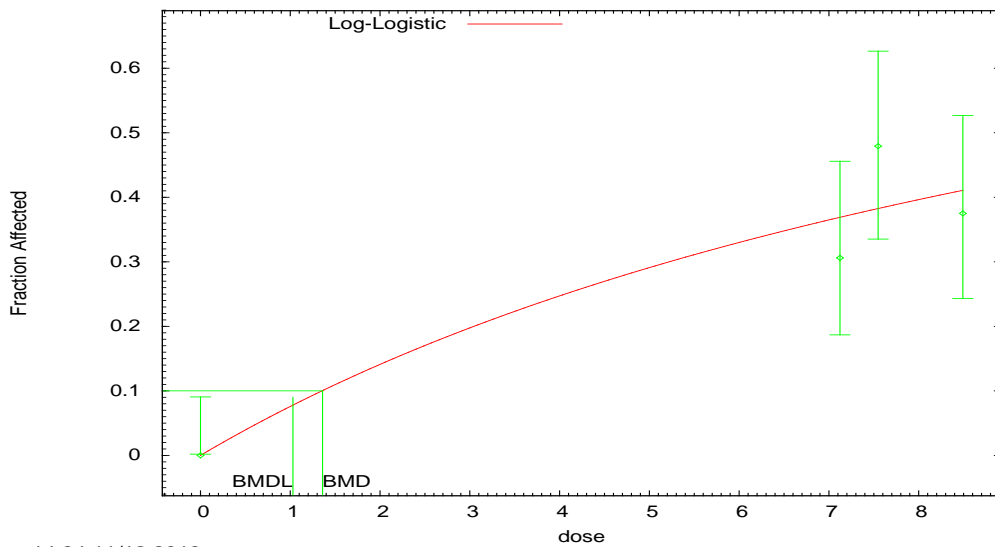

14:34 11/12 2013

**D: Probit\_m\_resm\_md4\_Pro-BMR10**

Probit Model, with BMR of 10% Extra Risk for the BMD and 0.95 Lower Confidence Limit for the BMD

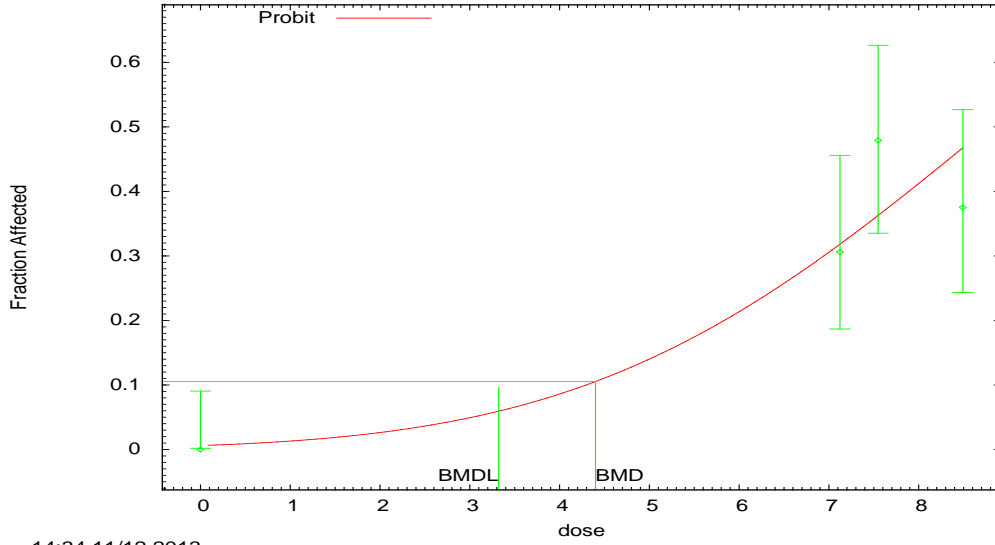

**E: LogProbit\_m\_resm\_md4\_Lnp-BMR10-Restrict**

LogProbit Model, with BMR of 10% Extra Risk for the BMD and 0.95 Lower Confidence Limit for the BMD

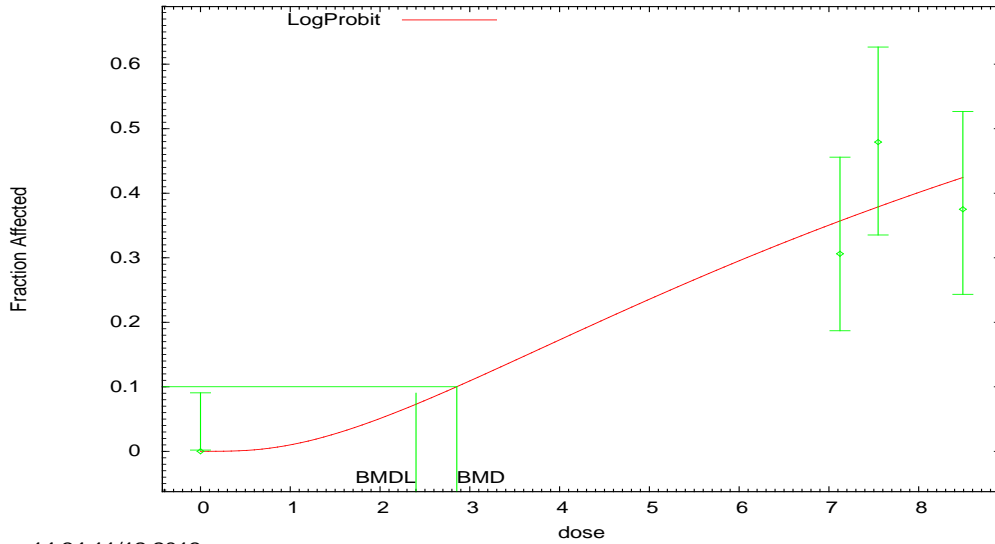

**F: Multistage\_m\_resm\_md4\_Mst2-BMR10-Restrict**

Multistage Model, with BMR of 10% Extra Risk for the BMD and 0.95 Lower Confidence Limit for the BMD

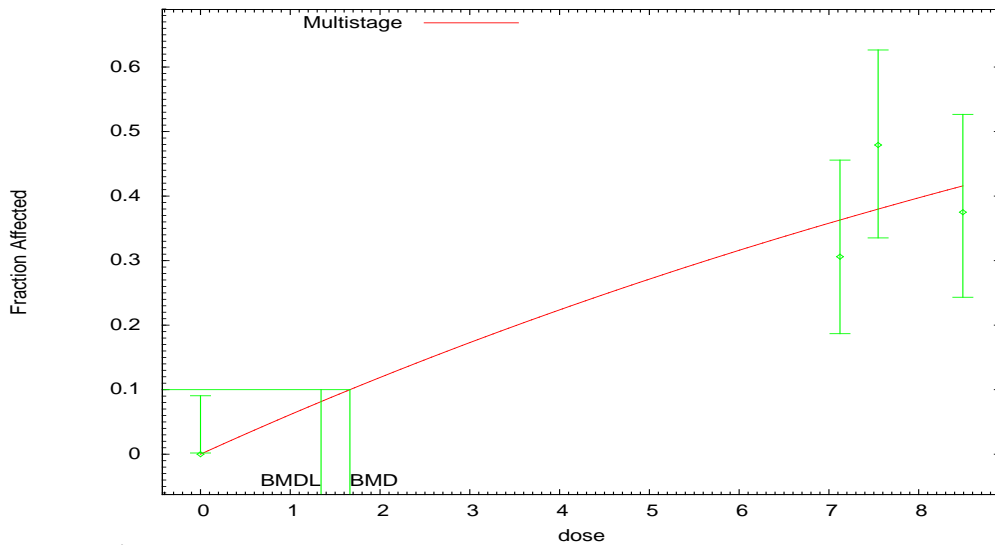

### G: Weibull\_m\_resm\_md4\_Wei-BMR10-Restrict

Weibull Model, with BMR of 10% Extra Risk for the BMD and 0.95 Lower Confidence Limit for the BM

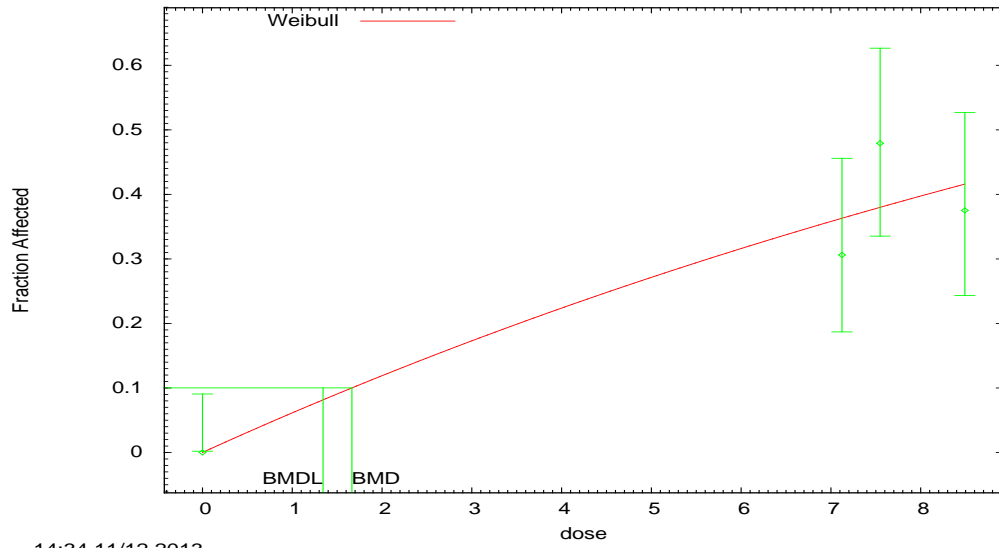

14:34 11/12 2013

### H: Quantal-Linear\_m\_resm\_md4\_Qln-BMR10

Quantal Linear Model, with BMR of 10% Extra Risk for the BMD and 0.95 Lower Confidence Limit for the

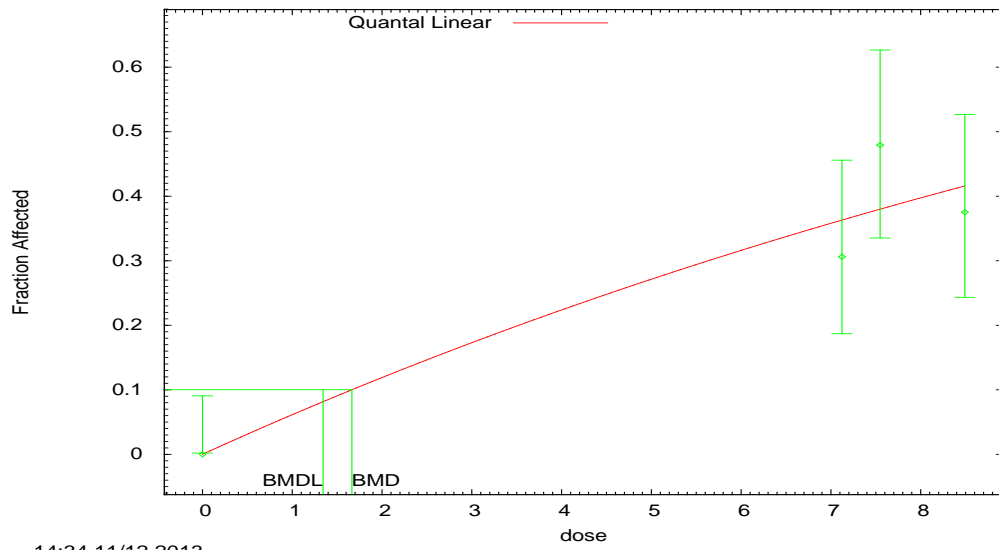

14:34 11/12 2013

## Model Selection Criteria:

### Best fit model:

- Select the model with a P-value  $\geq 0.1$  and with the lowest AIC
  - The lowest AIC model generally had largest P-value, too, but not always.
- If multiple models tie for lowest AIC and largest P-value, select the model with the smallest delta BMD (*i.e.*, BMD - BMDL).

### Averaging BMD and BMDL:

Models should be excluded from the average calculation if:

- The model fails to run.
- The model fails to calculate a BMDL or calculates a BMDL of 0.
- The P-value is less than 0.1.
- The AIC is qualitatively larger than other models in the endpoint group.
  - For example, among a set of AIC values containing 2, 3, 4, and 11, the model which produced an AIC of 11 would be excluded from the average calculation.
  - These usually have much lower P-values than the other models, too.

When more than one multistage model fits the data, the multistage model with the lowest AIC should be selected, such that only one multistage model is included in the average calculation.
